# Supplementary material for: Integrated volatile metabolome and transcriptome analyses provide insights into the warm aroma formation elicited by methyl jasmonate in carrot root
Source: Front Plant Sci. 2024 Sep 18;15:1467957. doi: 10.3389/fpls.2024.1467957 (PMC11457697; doi:10.3389/fpls.2024.1467957)
Supplement: Supplementary file 1 [file Table1.xlsx]

## Sheet: Sheet1
Table S1 Relative contents of volatile organic compounds in different samples
Index	Compounds	Class I	Formula	CAS	CK-1	CK-2	CK-3	CK-4	CK-5	CK-6	MeJA100-1	MeJA100-2	MeJA100-3	MeJA100-4	MeJA100-5	MeJA100-6	MeJA200-1	MeJA200-2	MeJA200-3	MeJA200-4	MeJA200-5	MeJA200-6	DIECA-1	DIECA-2	DIECA-3	DIECA-4	DIECA-5	DIECA-6	QC01	QC02	QC03
WMW0159	(+)-(1R,4R,5R)-2-(10)-PINEN-4-OL	Terpenoids	C10H16O	13040-03-4	0.0792279	0.0797435	0.0853107	0.068826	0.0805083	0.0663874	0.199459	0.221751	0.196932	0.20209	0.217163	0.168253	0.268728	0.246081	0.206246	0.215357	0.260835	0.209709	0.0382653	0.0372742	0.0363873	0.035048	0.0379791	0.0391909	0.125821	0.128215	0.141839
KMW0328	(+)-(E)-Limonene oxide	Terpenoids	C10H16O	6909-30-4	0.302439	0.308488	0.330332	0.264669	0.311041	0.252981	0.775274	0.868233	0.769266	0.786898	1.07416	0.66941	0.943486	0.865667	0.725392	0.764207	1.21725	0.753296	0.158377	0.144837	0.142622	0.141163	0.143529	0.171969	0.476101	0.502366	0.5592
XMW0006*015	(+)-3-Carene	Terpenoids	C10H16	498-15-7	4.44126	4.35249	4.65191	3.89525	4.26332	3.40134	7.16084	7.6994	6.57513	7.31808	7.48873	6.58444	5.75518	5.30626	4.81411	4.8424	5.13268	4.99152	1.67879	1.68095	1.57719	1.60782	1.81602	1.78987	5.11927	4.96376	4.932
XMW0192*015	(+)-4-Carene	Terpenoids	C10H16	29050-33-7	4.44126	4.35249	4.65191	3.89525	4.26332	3.40134	7.16084	7.6994	6.57513	7.31808	7.48873	6.58444	5.75518	5.30626	4.81411	4.8424	5.13268	4.99152	1.67879	1.68095	1.57719	1.60782	1.81602	1.78987	5.11927	4.96376	4.932
KMW0717	(+)-Diethyl L-tartrate	Ester	C8H14O6	87-91-2	0.00864998	0.00736533	0.00849605	0.00763331	0.00806339	0.00669471	0.01394	0.0267804	0.0129272	0.0159035	0.0202738	0.0136901	0.0120783	0.0102469	0.00974025	0.00784131	0.0101634	0.00852981	0.00402743	0.00387498	0.0029229	0.00263419	0.00345051	0.00510159	0.00874358	0.0103848	0.00890214
WMW0023*011	(+)-alpha-Pinene	Terpenoids	C10H16	7785-70-8	18.2366	18.0955	20.44	18.6241	19.1178	18.0242	59.1832	58.7217	55.343	61.821	67.8419	56.444	75.128	70.3359	66.3377	64.0782	71.3097	65.4526	6.53364	4.97822	5.20116	5.32166	5.60681	6.05397	35.051	38.3822	38.9798
D333	(+)-cis-Verbenol, acetate	Ester	C12H18O2	29135-27-1	0.721777	0.696339	0.719195	0.682461	0.683927	0.632007	1.17531	1.32123	1.09043	1.15393	1.46804	1.13103	1.14878	1.00057	0.950252	0.953138	1.10282	0.91284	0.61973	0.584012	0.566369	0.563116	0.568993	0.626149	1.11841	1.01206	1.26145
NMW0092	(+)-neodihydrocarveol	Terpenoids	C10H18O	18675-33-7	0.0035332	0.00339157	0.00342274	0.00335277	0.0034019	0.00317535	0.0306125	0.0344662	0.0303192	0.0324709	0.0399563	0.0291507	0.0400797	0.0366387	0.0359313	0.0366444	0.0427889	0.0341194	0.00396698	0.00381001	0.00359762	0.00360331	0.0035614	0.00402963	0.0177814	0.0200385	0.0187448
KMW0552	(-)-.beta.-Bourbonene	Terpenoids	C15H24	5208-59-3	0.461149	0.404516	0.468312	0.424138	0.448982	0.406924	1.37095	1.60374	1.27934	1.44599	1.82477	1.08844	2.09133	1.82085	1.76511	1.63042	1.94439	1.53046	0.395808	0.35679	0.337849	0.356061	0.375938	0.440565	0.840008	0.921535	0.826737
WMW0016	(-)-Bornyl acetate	Terpenoids	C12H20O2	5655-61-8	71.2142	69.729	72.5123	67.5269	68.8497	62.0801	240.415	275.869	234.519	238.359	302.587	233.216	235.656	208.094	201.054	200.114	231.685	194.88	61.4866	58.0843	55.862	55.9891	56.636	62.2831	123.595	146.589	136.455
D374	(-)-trans-Pinane	Terpenoids	C10H18	33626-25-4	0.0354526	0.0361925	0.0384564	0.0358197	0.0371663	0.0340442	0.132233	0.129929	0.111546	0.121824	0.150843	0.117293	0.131965	0.140227	0.128541	0.130474	0.132869	0.112325	0.0275295	0.0227941	0.0227141	0.02433	0.0236837	0.0232235	0.0660408	0.0654812	0.073583
NMW0072	(1.alpha.,2.beta.,5.alpha.)-2-methyl-5-(1-methylethenyl)-Cyclohexanol	Terpenoids	C10H18O	38049-26-2	0.0812684	0.0813339	0.0849021	0.0693422	0.0841234	0.0694465	0.1128	0.0145716	0.113415	0.115182	0.168609	0.124213	0.0158272	0.0140259	0.0137301	0.0137272	0.0830649	0.013799	0.0758579	0.0686809	0.0647666	0.0670101	0.0628198	0.0798094	0.0678005	0.0901225	0.0837183
KMW0616*152	(1.alpha.,4a.beta.,8a.alpha.)-1,2,3,4,4a,5,6,8a-octahydro-7-methyl-4-methylene-1-(1-methylethyl)-Naphthalene	Terpenoids	C15H24	39029-41-9	11.803	11.0665	10.8207	10.9126	11.1821	10.4269	32.2856	52.3341	30.7806	44.9829	43.5494	32.0266	52.1551	44.3413	42.6251	44.0729	52.9478	35.1035	10.4188	9.83316	9.24382	9.37074	9.35735	10.8357	19.8051	19.7623	18.3425
D408	(1Alpha,3beta,4beta)-p-menthane-3,8-diol	Terpenoids	C10H20O2	3564-95-2	0.0684069	0.0632928	0.0716887	0.0575913	0.0662484	0.056943	0.202032	0.238042	0.193009	0.203576	0.276628	0.198971	0.204839	0.186743	0.180184	0.180006	0.209505	0.174636	0.00439665	0.0223685	0.0199364	0.00399359	0.00394714	0.0259683	0.10492	0.123237	0.124296
KMW0418	(1R)-(-)-Myrtenal	Aldehyde	C10H14O	18486-69-6	0.0724555	0.069551	0.0701902	0.0687553	0.0697629	0.065117	1.04871	1.1619	1.04672	1.0012	1.29744	0.559064	1.30483	1.17174	0.880118	0.916604	1.17031	0.826118	0.081351	0.0781319	0.0737766	0.0738933	0.0730338	0.0826357	0.462463	0.501524	0.384399
XMW1180	(1R,1aR,2aS,5R,6R,6aS,7aS)-1,6,6a-trimethyldecahydro-1,2a-methanocyclopropa[b]naphthalen-5-ol	Terpenoids	C15H24O	860769-47-7	1.32975	1.31593	1.49526	0.252368	1.29626	0.239013	3.22749	3.73963	3.05476	3.34148	4.2943	2.85044	3.52224	3.13694	3.00335	2.8955	3.43488	2.70584	0.298601	0.286785	0.270799	0.271227	0.268072	0.303316	1.95114	2.24872	2.03441
XMW0746*118	(1R,2R,4S,6S,7S,8S)-8-Isopropyl-1-methyl-3-methylenetricyclo[4.4.0.02,7]decan-4-ol	Terpenoids	C15H24O	124753-76-0	0.213469	0.110491	0.128207	0.103266	0.139796	0.145014	0.160109	0.181898	0.189228	0.171828	0.167192	0.0880429	0.0755778	0.0688127	0.0752343	0.0655003	0.0856002	0.0716429	0.119925	0.122077	0.0859195	0.0968977	0.0995634	0.185382	0.0911428	0.0865051	0.078864
XMW0980*143	(1R,3aR,4aR,8aR)-1,4,4,6-Tetramethyl-1,2,3,3a,4,4a,7,8-octahydrocyclopenta[1,4]cyclobuta[1,2]benzene	Terpenoids	C15H24	94482-89-0	0.261435	0.223951	0.276429	0.228892	0.245996	0.21537	0.541905	0.622636	0.521326	0.536812	0.711984	0.483174	0.517467	0.457516	0.437395	0.42669	0.514338	0.418829	0.190388	0.171525	0.163274	0.174567	0.129793	0.203235	0.320175	0.353929	0.335269
D178	(1R,3aR,5aR,9aS)-1,4,4,7-Tetramethyl-1,2,3,3a,4,5a,8,9-octahydrocyclopenta[c]benzofuran	Terpenoids	C15H24O	104188-25-2	4.84919	5.60144	6.63473	5.2862	4.29152	4.7112	7.17703	8.52954	6.89981	7.36812	9.27618	7.79813	8.87246	6.29598	7.78545	7.88962	9.59798	8.46514	1.00087	0.961269	0.907684	0.90912	0.898546	1.01668	5.49365	8.69527	7.74113
XMW0033*143	(1R,3aS,4aS,8aS)-1,4,4,6-Tetramethyl-1,2,3,3a,4,4a,7,8-octahydrocyclopenta[1,4]cyclobuta[1,2]benzene	Terpenoids	C15H24	94535-52-1	0.261435	0.223951	0.276429	0.228892	0.245996	0.21537	0.541905	0.622636	0.521326	0.536812	0.711984	0.483174	0.517467	0.457516	0.437395	0.42669	0.514338	0.418829	0.190388	0.171525	0.163274	0.174567	0.129793	0.203235	0.320175	0.353929	0.335269
XMW1149	(1R,3aS,8aS)-1,4,4,6-Tetramethyl-1,2,3,3a,4,5,7,8-octahydrocyclopenta[c]pentalene	Terpenoids	C15H24	871660-96-7	0.021838	0.021889	0.0255486	0.0233872	0.0231693	0.0206223	0.0694865	0.0755375	0.0558786	0.0743342	0.0963125	0.0832811	0.0384337	0.0329924	0.0382568	0.0303204	0.031554	0.0285327	0.00788154	0.00721069	0.00764749	0.00717515	0.00798048	0.00790339	0.0343795	0.039315	0.0355467
XMW0045	(1R,4R,4aS,8aR)-4,7-Dimethyl-1-(prop-1-en-2-yl)-1,2,3,4,4a,5,6,8a-octahydronaphthalene	Terpenoids	C15H24	92692-39-2	3.21683	2.83002	3.12678	2.84491	2.94977	2.69188	1.82578	2.22562	1.69501	1.99029	2.46028	6.60688	0.424313	0.376022	0.368093	7.06626	8.51649	6.92142	1.96039	1.80171	1.7125	1.77097	1.82118	2.04047	4.38228	5.00068	4.46813
XMW0263	(1R,4S,9aS)-1-Methyl-4-((Z)-pent-2-en-4-yn-1-yl)octahydro-1H-quinolizine	Heterocyclic compound	C15H23N	151805-13-9	0.0331844	0.025807	0.0294192	0.0254479	0.0278382	0.0273533	0.0678513	0.0805333	0.0725162	0.0629341	0.0803383	0.00246869	0.1298	0.12231	0.122578	0.109868	0.0419239	0.115013	0.0553511	0.0513628	0.012228	0.0146434	0.0117164	0.0585698	0.0860986	0.0994281	0.101852
NMW0361	(1R,4aR,7R,8aR)-7-(2-Hydroxypropan-2-yl)-1,4a-dimethyldecahydronaphthalen-1-ol	Terpenoids	C15H28O2	4666-84-6	0.0102876	0.00713065	0.00766366	0.0048026	0.00766212	0.00557881	0.0130756	0.0246105	0.0140928	0.0133281	0.0256445	0.0100949	0.00968238	0.00883348	0.00851047	0.00852042	0.0129839	0.00801123	0.00447035	0.0036295	0.00298072	0.00337068	0.0034165	0.00614836	0.00632571	0.00862714	0.00608972
XMW0937	(1R,5S,6R)-2,7,7-Trimethylbicyclo[3.1.1]hept-2-en-6-yl acetate	Ester	C12H18O2	67999-48-8	1.15981	1.08324	1.25284	1.07488	1.08606	1.03407	4.49892	5.01651	4.31551	4.36081	5.43214	4.25276	6.84827	5.86131	5.77444	5.79486	6.38509	5.62553	0.363939	0.333143	0.32751	0.265194	0.344522	0.29427	2.59952	2.99992	2.83671
NMW0206	(1R,9R,E)-4,11,11-Trimethyl-8-methylenebicyclo[7.2.0]undec-4-ene	Terpenoids	C15H24	68832-35-9	3.51221	3.08444	3.5092	3.06241	3.23953	2.9096	7.86204	9.19458	7.41194	8.17721	10.3857	6.79213	3.30197	2.86969	2.6914	7.37413	8.79232	7.02066	2.02601	1.84262	1.75329	1.83191	1.87214	2.09337	4.69319	5.18318	4.62643
NMW0783*011	(1S)-2,6,6-Trimethylbicyclo[3.1.1]hept-2-ene	Terpenoids	C10H16	7785-26-4	18.2366	18.0955	20.44	18.6241	19.1178	18.0242	59.1832	58.7217	55.343	61.821	67.8419	56.444	75.128	70.3359	66.3377	64.0782	71.3097	65.4526	6.53364	4.97822	5.20116	5.32166	5.60681	6.05397	35.051	38.3822	38.9798
KMW0604	(1S,2E,6E,10R)-3,7,11,11-Tetramethylbicyclo[8.1.0]undeca-2,6-diene	Terpenoids	C15H24	24703-35-3	7.79257	6.86879	7.62413	5.23219	7.2343	6.70915	8.81403	9.69202	8.22	8.84621	11.3209	7.92879	11.4196	10.082	14.8871	16.2642	19.4764	11.8355	2.73218	2.39921	2.32573	2.4413	2.48393	2.79821	6.14768	7.36424	6.91276
XMW0819*058	(1S,4S,4aR)-1-Isopropyl-4-methyl-7-methylene-1,2,3,4,4a,5,6,7-octahydronaphthalene	Terpenoids	C15H24	157477-72-0	2.68613	2.36567	2.66639	2.47607	2.51923	2.31346	4.85845	7.12871	4.45954	6.32992	6.47175	5.1303	7.39119	6.62506	6.51101	6.12722	7.25771	6.09429	1.47277	1.3759	1.31978	1.30131	1.41837	1.51182	4.04103	3.45976	3.07718
XMW0197*058	(1S,4S,4aS)-1-Isopropyl-4,7-dimethyl-1,2,3,4,4a,5-hexahydronaphthalene	Terpenoids	C15H24	267665-20-3	2.68613	2.36567	2.66639	2.47607	2.51923	2.31346	4.85845	7.12871	4.45954	6.32992	6.47175	5.1303	7.39119	6.62506	6.51101	6.12722	7.25771	6.09429	1.47277	1.3759	1.31978	1.30131	1.41837	1.51182	4.04103	3.45976	3.07718
XMW0549	(1S,4aR,7R)-1,4a-Dimethyl-7-(prop-1-en-2-yl)-1,2,3,4,4a,5,6,7-octahydronaphthalene	Terpenoids	C15H24	52026-55-8	0.254128	0.220601	0.248606	0.228903	0.234073	0.215017	0.344249	0.368994	0.336263	0.343657	0.449677	0.38337	0.377632	0.336612	0.330412	0.34165	0.424284	0.340799	0.157652	0.146182	0.138353	0.141556	0.141547	0.168274	0.216691	0.267064	0.336903
XMW0853	(1S,4aR,7R,8aR)-1,4a-Dimethyl-7-(prop-1-en-2-yl)decahydronaphthalen-1-ol	Terpenoids	C15H26O	5945-72-2	0.0949249	0.0647576	0.0674867	0.0589515	0.070201	0.0698142	0.121917	0.142086	0.130573	0.121154	0.197844	0.0817588	0.0673754	0.0651969	0.0622697	0.0614166	0.0796115	0.0584834	0.0470436	0.0474713	0.0361192	0.0387179	0.038312	0.0639645	0.0425548	0.0447154	0.0407442
XMW0965*143	(1S,5S)-2-Methyl-5-((R)-6-methylhept-5-en-2-yl)bicyclo[3.1.0]hex-2-ene	Hydrocarbons	C15H24	159407-35-9	0.261435	0.223951	0.276429	0.228892	0.245996	0.21537	0.541905	0.622636	0.521326	0.536812	0.711984	0.483174	0.517467	0.457516	0.437395	0.42669	0.514338	0.418829	0.190388	0.171525	0.163274	0.174567	0.129793	0.203235	0.320175	0.353929	0.335269
XMW0817	(1S,5S,6R)-6-Methyl-2-methylene-6-(4-methylpent-3-en-1-yl)bicyclo[3.1.1]heptane	Terpenoids	C15H24	15438-94-5	0.674501	0.614497	0.696176	0.641955	0.639081	0.587474	1.35128	1.61999	1.22951	1.43798	1.81892	1.18431	1.41429	1.258	1.21136	1.084	1.28822	1.19162	0.389803	0.363856	0.3488	0.358373	0.451804	0.388928	0.887326	1.06552	0.798684
D177	(1aR,1bS,2aS,5S,5aS,7aS)-2,2,5,7a-Tetramethyldecahydrocyclopenta[2',3']cyclobuta[1',2':3,4]benzo[1,2-b]oxirene	Terpenoids	C15H24O	104188-24-1	2.04247	1.72208	2.00253	1.71524	1.8802	1.63659	0.24605	0.285983	0.242645	0.259602	0.340185	0.259779	0.310626	0.275273	0.269469	0.269411	0.32371	0.270821	1.42384	1.33663	1.24545	1.27276	1.29726	1.48827	2.74346	3.01682	2.76776
XMW0843	(2E,4S,7E)-4-Isopropyl-1,7-dimethylcyclodeca-2,7-dienol	Alcohol	C15H26O	198991-79-6	0.096704	0.0612902	0.0841164	0.0642663	0.07729	0.0665647	0.0412182	0.134426	0.0843016	0.109216	0.130324	0.0944274	0.0684142	0.0580778	0.0661478	0.0509971	0.0704019	0.0729109	0.0387994	0.0373185	0.031063	0.030124	0.0293689	0.0459639	0.066868	0.0689334	0.0731001
XMW0157*063	(2R,3R,6S)-6-Isopropyl-3-methyl-2-(prop-1-en-2-yl)-3-vinylcyclohexanone	Terpenoids	C15H24O	39020-72-9	0.0926742	0.0827217	0.0867455	0.0810973	0.086469	0.0794437	0.0171916	0.0199818	0.0169537	0.0181385	0.0237689	0.257689	0.325618	0.280228	0.268059	0.2224	0.263771	0.233988	0.0191908	0.0184314	0.017404	0.0174315	0.0172288	0.0194939	0.146795	0.18673	0.174337
XMW0216*063	(2S,3S,6S)-6-Isopropyl-3-methyl-2-(prop-1-en-2-yl)-3-vinylcyclohexanone	Terpenoids	C15H24O	21698-44-2	0.0926742	0.0827217	0.0867455	0.0810973	0.086469	0.0794437	0.0171916	0.0199818	0.0169537	0.0181385	0.0237689	0.257689	0.325618	0.280228	0.268059	0.2224	0.263771	0.233988	0.0191908	0.0184314	0.017404	0.0174315	0.0172288	0.0194939	0.146795	0.18673	0.174337
XMW0556*064	(2S,4aR,8aR)-4a,8-Dimethyl-2-(prop-1-en-2-yl)-1,2,3,4,4a,5,6,8a-octahydronaphthalene	Terpenoids	C15H24	123123-37-5	3.87412	4.52466	4.27454	4.0767	3.80714	3.66369	3.07151	3.60618	2.90029	3.35659	4.03134	2.95707	2.17528	2.21678	2.05547	2.50681	2.83573	1.18396	1.31185	1.19245	1.17707	1.17941	1.17785	1.3011	2.59777	3.42714	3.03537
XMW0685	(2S,6R,7S,8E)-(+)-2,7-Epoxy-4,8-megastigmadiene	Heterocyclic compound	C13H20O	108342-25-2	0.0685559	0.0643934	0.0728632	0.0653465	0.0648444	0.0598722	0.262046	0.302841	0.25593	0.263644	0.335798	0.262682	0.320238	0.281909	0.272399	0.26812	0.319828	0.272776	0.0239268	0.0225343	0.0219664	0.0211651	0.0236658	0.0238155	0.147243	0.174099	0.163657
D320	(3E,7E)-1,5,5,8-Tetramethylcycloundeca-3,7-dienol	Terpenoids	C15H26O	28446-26-6	0.171477	0.126588	0.11607	0.0993652	0.113658	0.110603	0.240914	0.303373	0.240977	0.260346	0.282188	0.22865	0.200705	0.19039	0.198011	0.158866	0.199567	0.163201	0.021679	0.0217446	0.0170243	0.0200831	0.0259414	0.0394713	0.147017	0.142765	0.120361
NMW0249	(3E,7E)-4,8,12-Trimethyltrideca-1,3,7,11-tetraene	Terpenoids	C16H26	62235-06-7	0.47172	0.0890417	0.261232	0.0810281	0.370261	0.350034	0.946201	1.13152	1.02718	0.916394	1.21773	0.675487	0.624222	0.554956	0.556012	0.560427	0.775225	0.559438	0.238384	0.246085	0.195109	0.211157	0.188054	0.361136	0.341514	0.356542	0.405269
D325	(3R,3aR,7S,8aS)-3,6,8,8-Tetramethyl-4,7,8,8a-tetrahydro-1H-3a,7-methanoazulen-2(3H)-one	Terpenoids	C15H22O	288249-25-2	0.23323	0.179533	0.197907	0.184656	0.193019	0.178231	0.302628	0.346667	0.34771	0.295696	0.376999	0.237834	0.213984	0.194665	0.187159	0.180598	0.233657	0.179899	0.148601	0.145608	0.122092	0.129129	0.123222	0.164872	0.169171	0.183271	0.165028
XMW0454*035	(3R,6S)-2,2,6-Trimethyl-6-vinyltetrahydro-2H-pyran-3-ol	Heterocyclic compound	C10H18O2	39028-58-5	0.436206	0.400716	0.409504	0.39482	0.401327	0.339918	0.312089	0.371752	0.30692	0.309146	0.367899	0.303948	0.375898	0.330825	0.283821	0.30707	0.314574	0.28963	0.370961	0.353503	0.320009	0.323924	0.331865	0.388009	0.385937	0.432384	0.381816
XMW0146	(3S,3aR)-3-Butyl-3a,4,5,6-tetrahydroisobenzofuran-1(3H)-one	Ester	C12H18O2	4567-33-3	0.00617154	0.00427315	0.0066352	0.00366712	0.00495183	0.00432007	0.00708823	0.0139489	0.00695241	0.012315	0.00662731	0.000820761	0.00735176	0.00620432	0.000851375	0.0077863	0.00793666	0.00538748	0.00982621	0.00948406	0.00872826	0.00962573	0.00873655	0.00695261	0.00581312	0.00609835	0.00583168
D244	(3S,3aR,3bR,4S,7R,7aR)-4-Isopropyl-3,7-dimethyloctahydro-1H-cyclopenta[1,3]cyclopropa[1,2]benzen-3-ol	Terpenoids	C15H26O	23445-02-5	0.0120026	0.0107293	0.0143866	0.00988195	0.0110153	0.00972071	0.0110301	0.0227572	0.010228	0.0203641	0.0130264	0.0190853	0.0128064	0.0102719	0.0101639	0.0107756	0.0133581	0.0110605	0.00204983	0.00196872	0.00185897	0.00186191	0.00184026	0.0020822	0.0130407	0.0111593	0.0107449
D322	(3S,3aR,6R,8aS)-3,7,7-Trimethyl-8-methylenehexahydro-1H-3a,6-methanoazulen-2(3H)-one	Terpenoids	C15H22O	28624-27-3	0.06962	0.0438614	0.045544	0.0395573	0.0499512	0.0524178	0.090693	0.105031	0.0992872	0.0904311	0.109816	0.0642075	0.0542233	0.0500608	0.0488959	0.0468253	0.0680511	0.047693	0.0352981	0.0355914	0.027324	0.0285699	0.0274	0.0505263	0.0350573	0.0379049	0.0388462
XMW0182	(3S,3aS,6R,8aS)-3,8,8-Trimethyl-7-methyleneoctahydro-1H-3a,6-methanoazulene	Terpenoids	C15H24	31145-21-8	4.78736	3.20643	4.76658	3.25087	4.38318	3.13584	7.89036	8.4463	7.26617	7.61932	10.1291	8.37924	13.11	11.6733	10.9109	11.2041	13.3329	11.047	3.02128	2.70653	2.56168	2.70425	2.83838	3.1132	4.84464	7.1672	6.38564
XMW1016	(4,4-Dimethyl-2,4,5,6-tetrahydro-1H-inden-2-yl)acetic Acid	Acid	C13H18O2	113522-67-1	0.090371	0.0716817	0.0763689	0.0712411	0.0744856	0.0697856	0.124665	0.139695	0.120982	0.117344	0.149223	0.0965583	0.0942261	0.0875334	0.0832198	0.0777008	0.0983649	0.074484	0.0504986	0.0503121	0.0466904	0.0454484	0.0472178	0.0585081	0.0734381	0.076361	0.0684588
D327	(4R,4aR)-4,4a-Dimethyl-6-(prop-1-en-2-yl)-1,2,3,4,4a,7-hexahydronaphthalene	Terpenoids	C15H22	28908-26-1	0.396342	0.453373	0.709046	0.432538	0.392341	0.394784	0.74231	0.7749	0.736618	0.686586	0.959829	0.765605	0.255339	0.412142	0.232312	0.201699	0.237726	0.330118	0.463596	0.288189	0.279764	0.414483	0.408607	0.455216	0.448842	0.390675	0.351494
XMW0388	(4aR,8aR)-5,8a-dimethyl-3-propan-2-ylidene-1,2,4,4a,7,8-hexahydronaphthalene	Terpenoids	C15H24	6813-21-4	8.42572	10.3972	8.59662	9.95249	9.14883	9.08593	7.67789	8.72111	7.13025	7.60844	9.78047	7.69272	5.18685	3.75289	4.61586	4.01193	4.74821	3.87331	6.29409	7.6237	6.92494	5.59135	5.75716	10.2549	7.52798	8.92147	7.48662
KMW0566*060	(4aR-trans)-decahydro-4a-methyl-1-methylene-7-(1-methylethylidene)-Naphthalene	Terpenoids	C15H24	515-17-3	1.38129	1.17438	1.38836	1.22475	1.25622	1.15529	1.63618	2.37179	1.53519	2.15426	2.06958	1.34134	2.97935	3.29017	2.45072	2.43009	2.99291	2.48644	0.533252	0.467988	0.450129	0.473433	0.476968	0.550091	1.48407	1.87349	1.69645
XMW0916	(5-bromopentyl)-Benzene	Aromatics	C11H15Br	14469-83-1	2.31109	2.58231	2.3401	2.60328	2.12542	1.9967	6.03919	6.9761	5.56917	6.31057	7.80888	5.11768	10.4187	9.32474	8.91679	8.28905	9.92354	8.04732	2.35087	2.28284	2.00123	2.09891	2.12109	2.56102	4.85257	5.31845	4.76539
D328	(5R,10R)-10-Methyl-6-methylene-2-(propan-2-ylidene)spiro[4.5]dec-7-ene	Terpenoids	C15H22	28908-27-2	0.194234	0.158399	0.201654	0.155289	0.169487	0.156081	0.641422	0.793665	0.602722	0.0260651	0.034156	0.48755	0.94859	0.834127	0.797496	0.720639	0.83437	0.665811	0.16386	0.147482	0.125048	0.147098	0.148239	0.178144	0.452662	0.479506	0.424106
NMW0252	(5R,6R)-3,6-Dimethyl-5-(prop-1-en-2-yl)-6-vinyl-6,7-dihydrobenzofuran-4(5H)-one	Terpenoids	C15H18O2	20493-56-5	0.126807	0.0873738	0.0764237	0.0785169	0.0789767	0.0962821	0.303179	0.377855	0.335713	0.301881	0.400102	0.21756	0.188893	0.155423	0.154941	0.170575	0.27743	0.176783	0.0658302	0.0909977	0.0735048	0.0743621	0.0519371	0.117685	0.0799429	0.089024	0.0920751
XMW0546	(5R,8aR)-5-Propyloctahydroindolizine	Heterocyclic compound	C11H21N	120057-35-4	0.209958	0.202449	0.205421	0.197456	0.199052	0.18295	0.762664	0.866212	0.730764	0.755231	0.948955	0.738206	0.73484	0.658289	0.627979	0.632858	0.713509	0.608988	0.179948	0.16926	0.164324	0.164594	0.165769	0.183553	0.385165	0.450905	0.4211
XMW1435	(6,6-dimethyl-2-bicyclo[3.1.1]hept-2-enyl)methyl 2-methylpropanoate	Ester	C14H22O2	29021-37-2	5.64624	4.95059	5.65463	1.29568	5.22924	4.70968	12.24	14.3266	11.5056	12.7208	16.2368	10.6413	14.735	13.1129	12.5931	11.7784	14.1207	11.2626	0.767876	0.703697	0.705674	0.710666	0.693085	0.756736	1.53954	2.27481	2.04118
WMW0065	(6Z)-Nonen-1-ol	Alcohol	C9H18O	35854-86-5	0.279336	0.23465	0.271832	0.211223	0.263639	0.190931	0.833505	0.944491	0.780242	0.799012	0.926843	0.561662	0.820954	0.70619	0.647339	0.67846	0.836545	0.654525	0.238165	0.231425	0.207669	0.21696	0.211341	0.265356	0.422944	0.436078	0.4597
D310	(8R,8aS)-8,8a-Dimethyl-2-(propan-2-ylidene)-1,2,3,7,8,8a-hexahydronaphthalene	Terpenoids	C15H22	27840-40-0	0.116139	0.10058	0.111085	0.0981133	0.111913	0.103383	0.0738492	0.147908	0.0766408	0.129719	0.0920818	0.079893	0.129266	0.117464	0.112508	0.0918393	0.126218	0.123323	0.0915557	0.0712509	0.0855084	0.0866852	0.0874771	0.0990921	0.0910118	0.120316	0.104476
KMW0573*147	(E)-.beta.-Famesene	Terpenoids	C15H24	18794-84-8	0.549328	0.45464	0.551905	0.464789	0.486491	0.448693	1.0394	1.20964	0.953792	1.08418	1.39064	1.18808	1.68959	1.25615	1.47536	1.12993	1.31114	1.04627	0.279658	0.251587	0.373914	0.255026	0.259795	0.28656	0.708561	0.734882	0.661477
WMW0052	(E)-1-Methyl-4-(6-methylhept-5-en-2-ylidene)cyclohex-1-ene	Terpenoids	C15H24	53585-13-0	107.055	95.0174	107.016	95.0398	100.391	91.2162	171.276	201.726	160.81	178.687	225.012	153.704	165.92	145.909	140.642	119.395	146.672	127.284	81.7732	75.8334	70.6917	73.0732	73.653	84.0285	111.86	124.532	114.054
XMW1072	(E)-2,6-Dimethylocta-5,7-dien-2-ol	Alcohol	C10H18O	7643-60-9	0.0864267	0.116899	0.124749	0.103803	0.120196	0.099379	0.388526	0.572001	0.385963	0.373491	0.432227	0.313635	0.412972	0.364222	0.336439	0.353083	0.42398	0.33602	0.0812943	0.0755053	0.112757	0.119721	0.0945021	0.0797894	0.255027	0.264851	0.235699
GMW0087	(E)-2-Decenal	Aldehyde	C10H18O	3913-81-3	0.819179	1.06033	1.15296	1.0565	1.02898	0.89131	0.969065	1.18901	0.71476	1.13356	1.63041	1.10529	1.43025	1.38016	1.14066	1.17874	1.46104	1.24386	0.523015	0.431277	0.457141	0.464156	0.541347	0.491997	0.926942	0.985304	0.993943
KMW0157*012	(E)-2-Heptenal	Aldehyde	C7H12O	18829-55-5	0.0544302	0.0539899	0.0611878	0.0573985	0.056183	0.0537989	0.287891	0.298578	0.270453	0.307254	0.345153	0.298084	0.298084	0.276827	0.260934	0.255772	0.289113	0.259016	0.0283979	0.0340693	0.028481	0.0360096	0.0383782	0.0344557	0.108824	0.118945	0.123877
XMW1227	(E)-2-Methylbut-2-en-1-yl methacrylate	Ester	C9H14O2	88142-95-4	0.254165	0.250396	0.204824	0.256006	0.258703	0.226701	0.231282	0.218241	0.221639	0.182225	0.240618	0.227524	0.456667	0.352287	0.39147	0.391226	0.348498	0.428198	0.17873	0.164942	0.164951	0.167511	0.172264	0.17476	0.198965	0.249985	0.270552
KMW0243	(E)-2-Octenal	Aldehyde	C8H14O	2548-87-0	0.0655875	0.0657944	0.0723022	0.0678843	0.0668769	0.063335	0.311148	0.307158	0.286652	0.318328	0.337052	0.270365	0.416655	0.366563	0.336565	0.339825	0.361308	0.338043	0.0694347	0.0630587	0.0643008	0.0662738	0.0697838	0.0665993	0.210934	0.255539	0.211938
XMW1000	(E)-5-((1R,3R,6S)-2,3-Dimethyltricyclo[2.2.1.02,6]heptan-3-yl)-2-methylpent-2-enal	Terpenoids	C15H22O	19903-70-9	0.165019	0.134552	0.144902	0.129125	0.141505	0.135277	0.28998	0.350327	0.306818	0.271547	0.354809	0.26165	0.226152	0.222766	0.213518	0.199361	0.240599	0.203066	0.0710747	0.0680048	0.0619483	0.0625996	0.0548965	0.0923019	0.116631	0.133543	0.129398
KMW0467*077	(E)-CinnamAldehyde	Aldehyde	C9H8O	14371-10-9	0.00177279	0.00690713	0.00266869	0.00587515	0.00227323	0.00575711	0.00774659	0.00904607	0.00781035	0.00810177	0.0152173	0.00756985	0.0132935	0.0114134	0.0143739	0.0111737	0.0124552	0.0107996	0.000398089	0.000382336	0.000361023	0.000361595	0.000357389	0.000404375	0.0108248	0.0114573	0.0115214
XMW0750	(E)-Tetradec-2-enal	Aldehyde	C14H26O	51534-36-2	0.0276909	0.0154282	0.0166129	0.0163228	0.0169114	0.0168771	0.0342029	0.0397208	0.0427822	0.0391862	0.0415828	0.0855348	0.0240208	0.0656549	0.00577024	0.0572919	0.0268682	0.0577028	0.01017	0.0120733	0.00863504	0.00935731	0.00790222	0.0167534	0.0145863	0.0169973	0.0155773
D344	(E,E)-2,4-Undecadienal	Aldehyde	C11H18O	30361-29-6	19.9119	18.2039	19.9589	18.1543	18.8398	17.0986	40.4405	46.7749	37.7263	41.4494	53.474	35.7696	43.7894	38.7713	37.3508	35.2585	41.9536	34.2049	4.25847	4.08996	3.86197	3.86808	3.82309	4.32572	24.1729	27.8805	25.3929
XMW1409	(R)-(+)-1-(p-Tolyl)ethylAmine	Amine	C9H13N	4187-38-6	0.151036	0.130903	0.134159	0.119731	0.138255	0.129269	0.435025	0.48559	0.456154	0.448523	0.570097	0.297052	0.572508	0.524628	0.46676	0.475082	0.62849	0.448132	0.0902681	0.0800008	0.0732089	0.0740133	0.0754803	0.0954344	0.205604	0.216109	0.210314
XMW0082	(R)-(-)-2-Pyrrolidinemethanol	Heterocyclic compound	C5H11NO	68832-13-3	0.0916272	0.0890896	0.0989379	0.0878905	0.0901665	0.0827938	0.0122961	0.0142917	0.0121259	0.0129734	0.0170004	0.0129822	0.0155232	0.0137565	0.0134664	0.0134636	0.0161771	0.013534	0.0718381	0.0661391	0.0644817	0.0658378	0.067195	0.0697138	0.198171	0.222173	0.211858
XMW0764*131	(S)-(-)-(4-Isopropenyl-1-cyclohexenyl)methanol	Terpenoids	C10H16O	18457-55-1	1.65318	1.62182	1.70481	1.56725	1.6047	1.43677	5.28597	6.02449	5.11202	5.28901	6.77753	5.19094	5.30719	4.68531	4.51318	4.46884	5.18626	4.37921	1.30836	1.25108	1.19961	1.18479	1.19793	1.31982	2.81216	3.32515	3.10998
NMW0277	(S)-4-(1-Acetoxyallyl)phenyl acetate	Ester	C13H14O4	52946-22-2	0.0398854	0.0336914	0.0376653	0.0297297	0.0377962	0.0252893	0.0344878	0.0419095	0.0336874	0.035641	0.0467313	0.0291956	0.0346734	0.0276539	0.0258066	0.0241878	0.0291675	0.0281045	0.0156739	0.0252149	0.0130381	0.0140881	0.0149188	0.032022	0.0276386	0.0283682	0.0294908
NMW0350	(S,E)-4-Hydroxy-3,5,5-trimethyl-4-(3-oxobut-1-en-1-yl)cyclohex-2-enone	Terpenoids	C13H18O3	39763-33-2	0.0148133	0.0108051	0.00783408	0.00578262	0.00829165	0.0081693	0.0127585	0.0242433	0.0143499	0.0239673	0.0386686	0.0167079	0.00766905	0.00693434	0.00683291	0.00665255	0.0524672	0.00646459	0.00606373	0.00396322	0.00317515	0.00304734	0.00267503	0.00885023	0.0172955	0.0188943	0.0180105
D370*114	(Z)-2,2-Dimethyl-3-(3-methylpenta-2,4-dien-1-yl)oxirane	Terpenoids	C10H16O	33281-83-3	0.186059	0.188397	0.173524	0.164412	0.197589	0.1624	0.0236089	1.65589	0.0232822	1.21595	1.78429	1.13845	1.96265	1.77768	1.55587	1.62045	1.978	1.50545	0.131772	0.130787	0.141767	0.132735	0.128731	0.133989	0.822282	0.809383	0.579206
D376	(Z)-2,6-Dimethylocta-2,5,7-trien-4-one	Ketone	C10H14O	33746-71-3	0.00856595	0.00856928	0.00897682	0.00756488	0.00829778	0.00711804	0.0416687	0.0476628	0.0413139	0.0431469	0.0559892	0.0388588	0.0567052	0.0518367	0.0516283	0.0502062	0.0592327	0.0482636	0.00553213	0.0050164	0.00473532	0.00529309	0.00542873	0.00589148	0.0212715	0.0232746	0.0227783
KMW0156*012	(Z)-2-Heptenal	Aldehyde	C7H12O	57266-86-1	0.0544302	0.0539899	0.0611878	0.0573985	0.056183	0.0537989	0.287891	0.298578	0.270453	0.307254	0.345153	0.298084	0.298084	0.276827	0.260934	0.255772	0.289113	0.259016	0.0283979	0.0340693	0.028481	0.0360096	0.0383782	0.0344557	0.108824	0.118945	0.123877
XMW1357	(Z)-Oxacyclopentadec-6-en-2-one	Ketone	C14H24O2	63958-52-1	0.0135991	0.0158286	0.0185235	0.0148067	0.0149618	0.016677	0.00824926	0.0181615	0.0115065	0.0083616	0.0113532	0.0103933	0.0133746	0.0170193	0.017006	0.0133784	0.0169451	0.0118567	0.00808883	0.016802	0.0105047	0.0204835	0.0085035	0.0164678	0.0121524	0.0130029	0.0154494
D288	(Z)-Pentadec-6-en-2-one	Ketone	C15H28O	252931-22-9	0.013148	0.00871339	0.0092755	0.00793328	0.00976721	0.00962978	0.0212367	0.0240331	0.0241294	0.0213816	0.0263584	0.0151527	0.0124984	0.0117348	0.0114868	0.0112499	0.0149309	0.0118445	0.00691827	0.00766362	0.00544343	0.00579589	0.00548966	0.0101093	0.00831196	0.00918615	0.00851212
NMW0306*099	(Z)-epi-.beta.-Santalol	Terpenoids	C15H24O	79081-90-6	0.0313605	0.0270661	0.0309029	0.0281726	0.0289575	0.0269277	0.0378482	0.0475667	0.0387803	0.0396181	0.0526685	0.0493402	0.0456418	0.0387047	0.0381874	0.0361739	0.0495628	0.0350747	0.0182431	0.015757	0.0127266	0.013872	0.0133102	0.0191025	0.0254179	0.0299839	0.0308135
KMW0661*133	.alpha.-Bisabolol	Terpenoids	C15H26O	515-69-5	0.288343	0.246518	0.286159	0.346274	0.339725	0.315105	0.314932	0.44308	0.306553	0.3529	0.474166	0.370267	0.293096	0.270923	0.268526	0.242479	0.330552	0.245806	0.168385	0.172812	0.142683	0.15155	0.138082	0.201046	0.19069	0.24107	0.257825
KMW0704	.alpha.-Calacorene	Terpenoids	C15H20	21391-99-1	0.581419	0.558112	0.563241	0.551727	0.559812	0.522531	5.27548	6.4873	5.29755	5.55436	6.66095	4.90088	4.2955	3.68847	3.61257	3.2016	4.05556	3.43615	0.652801	0.626969	0.59202	0.592957	0.58606	0.66311	6.44831	6.99651	5.29628
KMW0512	.alpha.-Cubebene	Terpenoids	C15H24	17699-14-8	0.0305169	0.0297522	0.0321338	0.0311121	0.0296413	0.026854	0.0416579	0.0417516	0.0361068	0.042106	0.0516594	0.0474762	0.0690323	0.0631305	0.0599034	0.0565645	0.0638246	0.0520773	0.00932173	0.00767268	0.0075374	0.0090239	0.00843654	0.00834216	0.0355803	0.0379997	0.0335423
KMW0613	.alpha.-Farnesene	Terpenoids	C15H24	502-61-4	3.82784	3.9858	3.51816	3.9233	3.74671	3.58455	15.9528	18.3066	15.2776	16.3817	21.0079	14.0793	17.9992	16.0687	15.5115	14.2992	17.1317	13.9346	3.7271	3.67326	3.44682	3.41643	3.35184	3.79159	8.03342	9.82305	9.0911
D216	.alpha.-Irone	Terpenoids	C14H22O	79-69-6	12.0813	11.0702	12.891	11.204	11.3664	10.4843	8.86252	8.13512	8.55693	7.33277	10.7461	7.74294	4.81516	4.25558	4.15777	4.60887	5.9311	5.6906	2.46193	2.27099	2.20263	2.23308	2.24888	2.45927	5.38825	8.37968	7.62251
XMW0598	.alpha.-Methylstyrene	Aromatics	C9H10	98-83-9	0.0286047	0.0280956	0.0313245	0.0248903	0.0296099	0.0230426	0.107549	0.114942	0.0985178	0.113521	0.131481	0.104266	0.125652	0.113509	0.10946	0.106798	0.118597	0.105827	0.0222781	0.0197506	0.0203799	0.0150711	0.0151335	0.020497	0.0522818	0.0591775	0.0597722
KMW0198*015	.alpha.-Phellandrene 1	Terpenoids	C10H16	99-83-2	4.44126	4.35249	4.65191	3.89525	4.26332	3.40134	7.16084	7.6994	6.57513	7.31808	7.48873	6.58444	5.75518	5.30626	4.81411	4.8424	5.13268	4.99152	1.67879	1.68095	1.57719	1.60782	1.81602	1.78987	5.11927	4.96376	4.932
XMW1495	.alpha.-Phellandrene, dimer	Aromatics	C20H32	7350-11-0	0.0210906	0.0153939	0.0165617	0.0110549	0.0167027	0.0151493	0.0292619	0.0832804	0.0316063	0.0298908	0.0788421	0.0219771	0.0248516	0.0216456	0.0230836	0.0196708	0.0317969	0.0179772	0.0118282	0.018573	0.0114385	0.0142874	0.00717672	0.0191668	0.0146532	0.0169885	0.013784
KMW0148*011	.alpha.-Pinene	Terpenoids	C10H16	80-56-8	18.2366	18.0955	20.44	18.6241	19.1178	18.0242	59.1832	58.7217	55.343	61.821	67.8419	56.444	75.128	70.3359	66.3377	64.0782	71.3097	65.4526	6.53364	4.97822	5.20116	5.32166	5.60681	6.05397	35.051	38.3822	38.9798
KMW0484*144	.alpha.-Terpineol	Terpenoids	C10H18O	98-55-5	0.00222792	0.0172923	0.0189386	0.0169625	0.0180102	0.0164233	0.0770341	0.0781532	0.0747312	0.0772477	0.102711	0.091958	0.0734572	0.0674104	0.0674166	0.0645458	0.0665447	0.0623879	0.0152646	0.0122803	0.012252	0.0125973	0.011516	0.0127048	0.0276543	0.0455808	0.0479019
KMW0516*081	.alpha.-Terpinyl acetate	Ester	C12H20O2	80-26-2	0.355956	0.332996	0.3809	0.329061	0.351834	0.307206	1.53199	1.81335	1.47242	1.53905	2.05807	1.51006	1.57715	1.41133	1.36971	1.35684	1.58019	1.32629	0.125545	0.118304	0.109519	0.10941	0.107279	0.129664	0.487458	0.620705	0.604194
D319	.beta.-Acorenol	Terpenoids	C15H26O	28400-11-5	0.654316	0.553233	0.595394	0.541963	0.579453	0.472904	0.745693	0.914684	0.718727	0.753131	1.03733	0.717716	0.681051	0.597845	0.588778	0.551054	0.687822	0.547566	0.424822	0.400146	0.357648	0.375534	0.370164	0.482805	0.595205	0.681959	0.554504
NMW0266	.beta.-Asarone	Aromatics	C12H16O3	5273-86-9	0.0203911	0.0275884	0.0259859	0.0263866	0.0226731	0.0239654	0.379281	0.375956	0.348547	0.340513	0.466879	0.504355	0.474864	0.379231	0.4409	0.412304	0.401521	0.430609	0.0106182	0.0077017	0.00609371	0.00812992	0.0069404	0.00803248	0.276461	0.219329	0.284642
GMW0078	.beta.-Bisabolene	Terpenoids	C15H24	495-61-4	23.5107	20.8847	22.1984	20.8363	21.6427	20.0426	81.3835	94.3761	77.5559	84.6774	105.942	70.5977	91.8566	82.4562	79.2298	73.3805	88.0631	71.1231	19.5982	18.2749	17.2177	17.566	17.8403	20.3433	42.6253	47.7566	44.3267
KMW0582*151	.beta.-Guaiene	Terpenoids	C15H24	88-84-6	0.432428	0.64351	0.481229	0.674578	0.710501	0.598937	1.34119	1.66719	1.13471	1.41513	2.03931	1.35058	0.0538436	0.0477157	0.0467095	0.0466996	0.0561117	0.0469439	0.261276	0.230998	0.215885	0.227017	0.235353	0.272999	0.621933	0.64702	0.592583
KMW0199	.beta.-Myrcene	Terpenoids	C10H16	123-35-3	11.2979	11.5791	12.8555	12.0401	11.8323	11.1306	55.4078	57.7009	50.6007	57.7596	65.5073	51.4872	60.0425	54.2416	51.2862	50.116	58.014	50.1488	7.24712	7.35851	7.61272	7.57132	8.10362	7.57758	19.2388	26.2131	21.3196
WMW0215*018	.beta.-Ocimene	Terpenoids	C10H16	13877-91-3	23.8486	23.4254	23.7077	23.3411	23.1046	21.8528	76.5107	76.5606	72.0427	77.9249	87.176	70.279	76.5213	66.9084	66.5047	65.0509	75.8976	63.9923	15.6219	14.6225	14.6872	14.5638	15.1593	15.1722	43.7513	44.9213	46.0553
D154	.beta.-Phenylethyl butyrate	Ester	C12H16O2	103-52-6	0.0619269	0.0537844	0.0602733	0.0570488	0.0561839	0.0512536	0.0816264	0.0876759	0.0816551	0.0822458	0.107403	0.0926553	0.09115	0.0810959	0.0799148	0.0821003	0.101948	0.0830035	0.0374937	0.0347777	0.0332696	0.0338399	0.0343441	0.0402362	0.0509696	0.0889553	0.0808871
KMW0193*119	.beta.-Pinene	Terpenoids	C10H16	127-91-3	50.3686	50.8965	55.0749	51.7567	51.9983	48.2171	170.219	185.308	160.147	177.402	212.918	168.214	194.766	177.109	170.034	164.791	191.372	164.842	36.945	35.366	36.3149	36.1186	38.1527	36.0745	87.2259	101.385	99.3296
KMW0684	.delta.-Dodecalactone	Ester	C12H22O2	713-95-1	0.0458827	0.0387265	0.0361081	0.0382306	0.0420101	0.0469541	0.0190135	0.0294435	0.0208052	0.0206149	0.024026	0.0215858	0.0197797	0.0192178	0.0216043	0.0189116	0.0258432	0.0232523	0.01878	0.0274026	0.0187823	0.0240978	0.0199111	0.0314381	0.0247348	0.0219765	0.0224799
WMW0175	.delta.-Terpineol, acetate	Terpenoids	C12H20O2	93836-50-1	0.142114	0.135938	0.149814	0.131918	0.137182	0.114082	0.455349	0.518551	0.425805	0.52234	0.656658	0.513073	0.603727	0.526112	0.530528	0.52426	0.570832	0.504032	0.0463205	0.0430028	0.0388161	0.0392671	0.0436168	0.0505116	0.263178	0.320759	0.292745
KMW0553	.gamma.-Elemene	Terpenoids	C15H24	29873-99-2	24.1496	21.8043	24.0876	21.6817	22.7458	20.7274	47.6891	54.9722	45.2557	48.9814	62.8729	42.1794	51.4431	45.3235	43.7555	42.3623	50.1938	39.898	14.1717	12.7127	12.4408	12.8852	13.1694	14.8122	29.1231	34.0889	30.7299
KMW0259	.gamma.-Terpinene	Terpenoids	C10H16	99-85-4	19.8721	19.0755	19.2508	18.8573	19.1336	17.8594	198.519	217.998	183.748	204.439	248.654	189.866	200.838	176.9	171.667	168.862	189.211	165.93	22.3119	21.429	20.2344	20.2665	20.0307	22.6642	95.7451	109.646	105.428
KMW0667	.tau.-Muurolol	Terpenoids	C15H26O	19912-62-0	0.256625	0.136021	0.14551	0.119172	0.203276	0.192132	0.356771	0.430316	0.352391	0.366417	0.462834	0.323429	0.301776	0.27733	0.250218	0.255348	0.311647	0.24692	0.173369	0.159002	0.139786	0.147577	0.147373	0.189325	0.230922	0.244209	0.226525
XMW1026	1(2H)-Naphthalenone, 3,4,4a,5,6,7-hexahydro-4a,5-dimethyl-3-(1-methylethenyl)-, [3S-(3.alpha.,4a.alpha.,5.alpha.)]-	Terpenoids	C15H22O	562-23-2	0.000195206	0.000187381	0.000189103	0.000185237	0.000187951	0.000175435	0.0126243	0.0175822	0.0130106	0.013646	0.017267	0.0115476	0.0105004	0.0095757	0.00832776	0.0097153	0.0116661	0.00812164	0.000219172	0.000210499	0.000993824	0.00131101	0.000196764	0.00154807	0.00757819	0.00836636	0.00854531
NMW0293	1(3H)-Isobenzofuranone, 3-butylidene-	Heterocyclic compound	C12H12O2	551-08-6	0.379193	0.184881	0.202321	0.174833	0.270588	0.280173	0.375395	0.358014	0.337675	0.322045	0.304866	0.225771	0.177815	0.165458	0.143236	0.160189	0.228485	0.191303	0.226472	0.314425	0.168111	0.204319	0.195249	0.414358	0.125534	0.140758	0.165256
XMW0262	1,1,7,7a-Tetramethyl-1a,2,6,7,7a,7b-hexahydro-1H-cyclopropa[a]naphthalene	Terpenoids	C15H22	154098-14-3	0.35587	0.323337	0.36451	0.319128	0.333957	0.299912	0.696113	0.810409	0.655536	0.71861	0.939466	0.638896	0.764364	0.693233	0.661312	0.628272	0.751988	0.604747	0.0749363	0.071971	0.0679591	0.0680666	0.0672749	0.0761197	0.446361	0.503976	0.458998
WMW0082	1,10-Undecadiene	Hydrocarbons	C11H20	13688-67-0	1.22801	1.16347	1.19437	1.09421	1.16764	1.10972	6.38954	13.4542	10.5666	6.64283	6.41289	9.172	18.243	16.1083	13.4511	13.56	11.7582	13.4713	1.15143	1.08517	1.02991	1.04658	1.07261	1.18092	0.788342	1.14808	0.889614
XMW0191	1,2,3,4-Tetrahydro-3-isopropyl-5-methyl-1-oxonaphthalene	Ketone	C14H18O	29107-42-4	0.844996	0.704835	0.769462	0.687465	0.741286	0.669895	0.824806	1.01972	0.799341	0.850045	1.1273	0.760345	0.726184	0.655483	0.637875	0.58831	0.763277	0.582889	0.54811	0.520472	0.459369	0.481567	0.471707	0.617217	0.696033	0.787401	0.654078
KMW0581	1,2,3-trimethoxy-5-(2-propenyl)-Benzene	Aromatics	C12H16O3	487-11-6	0.279583	0.259578	0.285497	0.24291	0.257737	0.228228	1.52693	1.94604	1.47518	1.63375	1.9874	1.65492	2.48675	2.18368	2.09576	2.09786	2.42747	1.74832	0.119981	0.108354	0.0976858	0.106022	0.0983668	0.119306	0.819053	0.999424	0.935264
XMW0444	1,2,4,5-Tetrazin-3-Amine	Heterocyclic compound	C2H3N5	79329-74-1	0.214541	0.211458	0.223284	0.208987	0.213339	0.195819	0.614126	0.683363	0.587153	0.639289	0.78438	0.612502	0.705646	0.637897	0.612568	0.599281	0.70756	0.595649	0.173498	0.159749	0.161048	0.133876	0.165146	0.162862	0.320716	0.373456	0.362724
XMW0448	1,2,4,5-Tetrazine-3,6-diAmine	Heterocyclic compound	C2H4N6	19617-90-4	0.0226556	0.0206383	0.0224783	0.0221466	0.023059	0.0199066	0.0144243	0.0179093	0.0148226	0.00304375	0.00398856	0.00304583	0.00364199	0.00322749	0.00315944	0.00315876	0.0037954	0.00317529	0.0174186	0.022779	0.0169287	0.019046	0.0182054	0.021781	0.0143185	0.0157161	0.0175076
NMW0223	1,2,4-Benzenetriol	Alcohol	C6H6O3	533-73-3	0.00622257	0.00658979	0.00503798	0.00623609	0.00609852	0.00636097	0.0130835	0.0144626	0.0121991	0.014334	0.0150734	0.0128088	0.0137604	0.012448	0.0117855	0.0104036	0.0159582	0.0130812	0.00634646	0.00641844	0.0059477	0.00608167	0.00552573	0.00678146	0.00803383	0.011322	0.0110704
XMW0974	1,2,4-Methenoazulene, decahydro-1,5,5,8a-tetramethyl-, [1S-(1.alpha.,2.alpha.,3a.beta.,4.alpha.,8a.beta.,9R*)]-	Terpenoids	C15H24	1137-12-8	0.242064	0.210534	0.24111	0.204525	0.219019	0.196996	0.7318	0.737821	0.686205	0.752672	0.942527	0.562613	1.08919	0.968272	0.921726	0.860615	1.03029	0.810169	0.242266	0.218234	0.208211	0.216169	0.219936	0.244616	0.397037	0.430878	0.436347
XMW0053	1,2-Benzenedicarboxylic acid, bis(2-methylpropyl) ester	Ester	C16H22O4	84-69-5	0.00215978	0.0020732	0.00209225	0.0526935	0.00207952	0.00194103	0.00217233	0.00252489	0.00214226	0.00229197	0.00300342	0.00229354	0.0183371	0.0182781	0.0158901	0.0162644	0.0214185	0.014977	0.0121247	0.00232898	0.00219916	0.00220264	0.0118087	0.00246323	0.0120474	0.0151591	0.016019
XMW0107	1,2-Benzenedimethanol	Alcohol	C8H10O2	612-14-6	0.20627	0.181077	0.20813	0.176512	0.187756	0.172376	0.584632	0.672282	0.54856	0.601287	0.757992	0.455658	0.88106	0.783938	0.748369	0.707222	0.849175	0.664213	0.154924	0.14032	0.129705	0.141239	0.14097	0.160051	0.366778	0.397651	0.356582
NMW0109	1,2-Benzenediol, 3-methyl-	Alcohol	C7H8O2	488-17-5	0.0243947	0.0333395	0.0374621	0.0322055	0.0333871	0.029893	0.0710874	0.0752886	0.0672324	0.0726668	0.0896279	0.0697677	0.107723	0.0935381	0.0944094	0.0922913	0.103471	0.0938463	0.0110985	0.00987948	0.0113234	0.0103556	0.0113433	0.0106377	0.0336224	0.0385563	0.0379335
NMW0119	1,2-Benzenediol, 4-methyl-	Alcohol	C7H8O2	452-86-8	1.58293	1.52403	1.6995	1.49585	1.51233	1.38682	5.70675	6.50256	5.4865	5.66498	7.11364	5.53784	5.4942	4.91973	4.70511	4.69598	5.3313	4.54461	1.35897	1.27554	1.24408	1.24068	1.25301	1.37686	2.89068	3.38773	3.14473
NMW0070	1,2-Propanedione, 1-phenyl-	Ketone	C9H8O2	579-07-7	0.0674048	0.0571024	0.0597166	0.0436967	0.0595914	0.042824	0.284223	0.375804	0.285109	0.295443	0.390251	0.18297	0.357919	0.325508	0.303513	0.297069	0.416898	0.27826	0.0354159	0.0277288	0.0237996	0.0249311	0.0253038	0.0395555	0.148177	0.152501	0.138792
XMW0588	1,3,5-Triazaadamantan-7-ol	Heterocyclic compound	C7H13N3O	130267-10-6	0.198796	0.18477	0.178145	0.175708	0.183498	0.181047	0.121758	0.140549	0.119087	0.120291	0.15227	0.134709	0.138549	0.12601	0.111744	0.118631	0.119333	0.11335	0.186748	0.182084	0.165042	0.171032	0.166684	0.197602	0.149152	0.167965	0.152964
XMW1411	1,3,6,10-Dodecatetraene, 3,7,11-trimethyl-, (Z,E)-	Terpenoids	C15H24	26560-14-5	0.444699	0.476956	0.42607	0.474857	0.511078	0.465347	0.464042	0.506641	0.441063	0.453956	0.603199	0.3562	0.951727	1.29926	1.24213	0.801815	0.988506	0.830768	0.10477	0.0914524	0.0865354	0.138551	0.139024	0.104846	0.297221	0.400672	0.371006
KMW0235*018	1,3,6-Octatriene, 3,7-dimethyl-, (Z)-	Terpenoids	C10H16	3338-55-4	23.8486	23.4254	23.7077	23.3411	23.1046	21.8528	76.5107	76.5606	72.0427	77.9249	87.176	70.279	76.5213	66.9084	66.5047	65.0509	75.8976	63.9923	15.6219	14.6225	14.6872	14.5638	15.1593	15.1722	43.7513	44.9213	46.0553
KMW0252*154	1,3,7-Octatriene, 3,7-dimethyl-	Terpenoids	C10H16	502-99-8	105.509	103.412	105.403	101.494	102.987	95.5388	13.6956	15.9183	13.5061	14.4499	18.9353	14.4598	17.29	15.3222	14.9991	14.9959	18.0183	15.0744	81.7534	73.4163	74.6553	75.3225	76.7966	77.9529	212.632	238.343	233.145
XMW0455	1,3-Benzenediol, 4,5-dimethyl-	Phenol	C8H10O2	527-55-9	0.460273	0.0688299	0.433047	0.543309	0.0690395	0.0644418	0.468151	0.553495	0.441478	0.458239	0.623278	0.46916	0.564349	0.507832	0.439347	0.458193	0.47442	0.458241	0.645566	0.653194	0.543974	0.599172	0.568988	0.707532	0.506608	0.486317	0.438606
NMW0130	1,3-Benzodioxol-5-ol	Heterocyclic compound	C7H6O3	533-31-3	0.329019	0.319862	0.347594	0.306724	0.318335	0.268718	1.12546	1.27962	1.56737	1.27877	1.60279	1.26	1.52185	1.33326	1.70507	1.32688	1.41838	1.26973	0.10538	0.0993637	0.09547	0.0929336	0.104733	0.10697	0.664915	0.797259	0.729138
XMW0741	1,3-Benzodioxole, 2-acetyl-4-methoxy-2-methyl-	Heterocyclic compound	C11H12O4	91057-65-7	0.0364863	0.0266406	0.0287441	0.0221494	0.0274614	0.0265327	0.104504	0.12173	0.12209	0.100078	0.130376	0.0704824	0.0739081	0.064771	0.0632168	0.0559323	0.0847216	0.0568165	0.0239535	0.0259557	0.0212875	0.0213933	0.0201642	0.0300511	0.0266803	0.0349388	0.0442289
KMW0223	1,3-Cyclohexadiene, 1-methyl-4-(1-methylethyl)-	Terpenoids	C10H16	99-86-5	6.4199	6.19495	6.80733	6.3673	6.10104	5.50441	15.5647	16.3497	14.3263	16.0617	17.4704	15.4782	13.2465	11.8483	11.1415	11.1151	11.9251	11.2408	2.9247	2.88223	2.77978	2.68555	3.01189	2.99159	9.11909	9.30243	8.80858
KMW0595*084	1,3-Cyclohexadiene, 5-(1,5-dimethyl-4-hexenyl)-2-methyl-, [S-(R*,S*)]-	Terpenoids	C15H24	495-60-3	3.36921	3.37559	3.50107	3.53808	2.46219	2.19359	8.263	9.76708	7.44052	8.62997	11.1597	7.45438	8.73431	7.80235	7.5202	6.80263	7.9215	6.44661	2.12909	1.91835	1.85002	1.89975	2.00592	2.13375	4.57302	5.37426	5.1102
XMW0416	1,3-Cyclohexadiene, 5-butyl-	Hydrocarbons	C10H16	30168-57-1	10.5352	10.4623	11.0204	10.4095	10.3681	9.64978	30.036	20.332	28.1567	30.3231	21.7492	19.6038	19.9195	32.0486	18.0859	17.1749	21.7214	17.0978	5.46287	4.5836	4.63753	4.54696	4.68676	4.76295	14.9017	12.557	11.8281
KMW0479*140	1,3-Cyclohexadiene-1-carboxaldehyde, 2,6,6-trimethyl-	Terpenoids	C10H14O	116-26-7	1.24568	1.1827	1.11955	1.11354	1.14503	1.04159	0.14837	0.17245	0.146316	0.156542	0.205134	0.156648	0.187309	0.165991	0.162491	0.162457	0.195199	0.163307	1.17084	1.14493	1.04085	1.09742	1.04537	1.22183	0.732121	0.80977	0.782602
D393	1,3-Cyclohexadiene-1-carboxylic acid, 2,6,6-trimethyl-, ethyl ester	Ester	C12H18O2	35044-59-8	1.75524	1.53023	1.70447	1.57111	1.59358	1.47528	2.24716	2.40812	2.2176	0.194342	2.94006	2.56779	2.80333	2.49359	2.45149	2.32311	2.91377	2.33899	1.06689	0.987402	0.933603	0.957288	0.964501	1.13063	2.29574	2.58845	2.32773
XMW0153	1,3-Cyclopentadiene, 1,2,3,4,5-pentamethyl-	Hydrocarbons	C10H16	4045-44-7	6.38842	6.39506	6.84751	6.50657	6.48695	6.1373	23.9329	26.7685	23.049	24.4697	30.7553	23.872	30.2679	27.5398	26.4421	22.6909	26.9835	25.5238	3.98296	4.64764	4.74753	4.70781	4.94571	4.69674	13.5622	15.6385	15.2309
XMW0772	1,3-Cyclopentanedione, 2-acetyl-4-methyl-	Ketone	C8H10O3	4056-69-3	11.9649	11.7415	12.4213	11.3208	11.5793	9.78272	40.4345	45.943	38.6661	40.3599	51.8411	39.5346	40.4653	35.8905	34.5374	34.239	39.0879	33.5397	9.8161	9.25365	9.0015	8.92881	9.06214	10.0072	21.7792	24.9244	23.5449
XMW0036	1,3-Cyclopentanedione, 4-(3-methylbutyl)-	Ketone	C10H16O2	939-86-6	0.0115878	0.0122446	0.012068	0.0118808	0.0111696	0.0105203	0.0255831	0.0380348	0.0253662	0.0291275	0.036621	0.0233986	0.0147184	0.0125349	0.0126198	0.0140033	0.0157499	0.0128354	0.00706627	0.00601083	0.00416203	0.00388633	0.00535105	0.0082486	0.010056	0.0130764	0.0110867
XMW1239	1,3-Dioxepane, 2-heptyl-	Heterocyclic compound	C12H24O2	61732-92-1	0.0293488	0.0252897	0.00975687	0.00994032	0.00949901	0.00882119	0.0014007	0.00162803	0.00138132	0.00147785	0.00193659	0.0073943	0.0355394	0.0309711	0.0288875	0.0293045	0.0018428	0.0289818	0.0128508	0.0126705	0.011973	0.0124393	0.0116334	0.0138964	0.00888474	0.00959842	0.00913034
XMW0021	1,3-Dioxolan-2-one	Ketone	C3H4O3	96-49-1	0.00375414	0.00415819	0.00422995	0.00446294	0.00394957	0.00400912	0.0113398	0.0113968	0.0101939	0.0113193	0.0129746	0.0109512	0.0128052	0.0117759	0.011533	0.0108928	0.012057	0.0112882	0.0014835	0.00169771	0.00150481	0.0015641	0.00178931	0.00173509	0.00558758	0.00562992	0.00571876
XMW1291	1,3-Dioxolane, 4-methyl-2-(2-methylpropyl)-	Heterocyclic compound	C8H16O2	18433-93-7	0.00763902	0.00760562	0.00841286	0.00744294	0.00821637	0.00755273	0.023871	0.0256195	0.0225134	0.0261996	0.0286017	0.024255	0.0314185	0.0292739	0.027342	0.0261643	0.0291015	0.0267385	0.00258235	0.00229972	0.00197308	0.00218755	0.0022417	0.0020602	0.0146542	0.0163272	0.0161394
WMW0126	1,3-Hexadiene, 3-ethyl-2-methyl-	Hydrocarbons	C9H16	61142-36-7	5.59218	5.52724	6.1028	5.47821	5.57195	5.15538	28.035	31.1107	27.89	28.9252	35.0713	27.2214	40.3101	35.4658	34.623	33.8067	39.5122	33.4403	2.80114	2.59547	2.68018	2.68574	2.83931	2.65866	12.0787	15.0875	13.6474
XMW0809	1,3-Pentanedione, 4,4-dimethyl-1-phenyl-	Ketone	C13H16O2	13988-67-5	0.0109635	0.0153116	0.0205918	0.0176087	0.0166313	0.00857049	0.00176239	0.00204842	0.001738	0.00185946	0.00243665	0.00186072	0.00222492	0.00197171	0.00193013	0.00192972	0.00231865	0.00193981	0.0100276	0.0106008	0.00900631	0.00900065	0.00883097	0.0120969	0.0148468	0.01869	0.0194891
XMW0098*043	1,4-BenzenedicarboxAldehyde	Aldehyde	C8H6O2	623-27-8	0.192142	0.222426	0.247378	0.175123	0.163545	0.162246	0.230011	0.262862	0.22718	0.22836	0.283557	0.225407	2.07465	1.85668	1.70381	1.79638	1.98503	1.75352	0.178696	0.155219	0.163445	0.169829	0.169983	0.179624	0.466907	0.529837	0.505974
XMW0209	1,4-Cyclohexadiene-1-methanol, 4-(1-methylethyl)-	Alcohol	C10H16O	22539-72-6	0.347437	0.313571	0.35703	0.311114	0.338313	0.276162	0.61012	1.13518	0.562263	0.680381	0.868078	0.57784	0.416422	0.373288	0.348217	0.333884	0.423219	0.356693	0.160857	0.154257	0.11525	0.10482	0.144593	0.211197	0.360499	0.443554	0.366228
NMW0026	1,4-Dithiane	Amine	C4H8S2	505-29-3	0.605772	0.58149	0.586834	0.574837	0.583261	0.544418	6.10979	6.5422	5.74555	6.25167	7.49935	5.77488	6.06953	5.40441	5.20307	5.14047	6.02699	5.04085	0.680145	0.653231	0.616818	0.617793	0.610608	0.690886	2.94097	3.22544	3.21382
XMW1064	1,4-Methano-1H-Cyclopropa[d]pyridazine, 4,4a,5,5a-tetrahydro-6,6-dimethyl-, (1.alpha.,4.alpha.,4a.alpha.,5a.alpha.)-	Heterocyclic compound	C8H12N2	109746-10-3	0.0279566	0.020863	0.0173216	0.0161988	0.0221016	0.0227766	0.0484502	0.00247807	0.0264338	0.00224948	0.00294773	0.00225101	0.0026916	0.00238527	0.00233497	0.00233447	0.0224207	0.00234669	0.0130042	0.011429	0.0111267	0.0111304	0.0114036	0.0144448	0.0194301	0.0205628	0.0191368
XMW0031	1,4-Methanoazulen-3-ol, decahydro-1,5,5,8a-tetramethyl-, [1S-(1.alpha.,3.beta.,3a.beta.,4.alpha.,8a.beta.)]-	Terpenoids	C15H26O	99481-30-8	0.0411488	0.027995	0.0331138	0.0264266	0.0326351	0.0321649	0.0765829	0.0857532	0.0846577	0.0719968	0.105721	0.0782532	0.0726079	0.0601248	0.0615327	0.0655351	0.0893766	0.0692298	0.0246177	0.0253205	0.020309	0.0199708	0.0170244	0.0308452	0.0276666	0.0279254	0.0305194
XMW0652	1,4-Pentanediol	Alcohol	C5H12O2	626-95-9	0.00497329	0.00526293	0.00617901	0.00551174	0.00564123	0.00502997	0.0181594	0.0177618	0.0164314	0.0187271	0.020554	0.0174117	0.0228014	0.0204445	0.0191702	0.0194311	0.0214009	0.0196564	0.0028099	0.00152749	0.00158122	0.00150622	0.00155436	0.00304851	0.00917822	0.00978655	0.0106335
KMW0623	1,5-Cyclodecadiene, 1,5-dimethyl-8-(1-methylethylidene)-, (E,E)-	Terpenoids	C15H24	15423-57-1	1.65442	1.58811	1.6027	1.56994	1.59294	1.48686	33.435	34.3378	31.9304	31.0811	42.5727	32.5809	32.9395	28.1214	27.3961	23.0789	38.667	9.15781	1.85754	1.78404	1.68459	1.68726	1.66763	1.88688	15.025	30.6118	25.2981
XMW0634*039	1,5-Cyclohexadiene-1-methanol, 4-(1-methylethyl)-	Terpenoids	C10H16O	19876-45-0	0.0267077	0.0277496	0.0299341	0.0263074	0.0295601	0.0219558	0.1752	0.198754	0.175452	0.180341	0.258249	0.15618	0.134722	0.12763	0.114554	0.115422	0.163869	0.108474	0.014622	0.0118272	0.0122089	0.0125204	0.0125704	0.0153367	0.0494859	0.0506516	0.0554394
XMW0437	1,5-Cyclooctadiene, 1,6-dimethyl-	Hydrocarbons	C10H16	3760-13-2	38.1003	36.573	36.9092	36.1546	36.6844	34.2414	230.62	244.877	420.979	455.163	264.915	211.825	586.382	481.127	334.572	357.45	518.516	353.072	42.778	41.0853	38.795	38.8564	38.4044	43.4536	284.398	322.377	308.257
XMW0097	1,5-Cycloundecadiene, 8,8-dimethyl-9-methylene-	Hydrocarbons	C14H22	62338-54-9	5.21091	4.55799	5.25855	5.96525	4.79048	4.51079	8.17497	9.14041	7.65649	8.31374	10.592	6.53674	17.4079	15.6317	14.916	13.1843	15.942	9.92174	2.49104	1.95567	1.89353	2.19929	2.19759	2.56412	6.03834	7.11684	6.61283
XMW0573	1,5-Diazabicyclo[3.1.0]hexane	Heterocyclic compound	C4H8N2	13090-31-8	0.115736	0.101878	0.0984406	0.103225	0.104145	0.0982576	0.0734542	0.0773347	0.0733544	0.0707455	0.0868186	0.0763228	0.0755999	0.0661132	0.0660383	0.0658062	0.0671254	0.0658606	0.0739539	0.07306	0.0611358	0.0662496	0.063766	0.079872	0.0807377	0.0857644	0.0809506
WMW0075	1,6,10-Dodecatrien-3-ol, 3,7,11-trimethyl-	Terpenoids	C15H26O	7212-44-4	6.22909	6.97253	5.76344	6.76315	6.45373	6.24634	10.8621	12.9164	4.67694	11.3599	14.2651	7.6111	6.62363	7.83499	7.75044	6.21127	7.562	6.82341	6.33701	4.97976	4.77175	5.67832	5.69086	6.46637	6.68158	7.01734	6.41796
NMW0200*147	1,6,10-Dodecatriene, 7,11-dimethyl-3-methylene-	Terpenoids	C15H24	77129-48-7	0.549328	0.45464	0.551905	0.464789	0.486491	0.448693	1.0394	1.20964	0.953792	1.08418	1.39064	1.18808	1.68959	1.25615	1.47536	1.12993	1.31114	1.04627	0.279658	0.251587	0.373914	0.255026	0.259795	0.28656	0.708561	0.734882	0.661477
XMW1295	1,6-HexanediAmine, N,N,N',N'-tetramethyl-	Amine	C10H24N2	111-18-2	0.000149086	0.000143109	0.000144425	0.000141472	0.000143545	0.000133986	0.000149952	0.000174288	0.000147877	0.000158211	0.000207321	0.000158319	0.000946532	0.000167761	0.000164224	0.000164189	0.000197281	0.000165048	0.683133	0.60956	0.594564	0.591086	0.587572	0.71204	0.202618	0.254404	0.199243
D264	1,6-Octadiene, 3,7-dimethyl-	Terpenoids	C10H18	2436-90-0	0.0762599	0.0766708	0.0850661	0.0784756	0.0788618	0.0734625	0.322019	0.326925	0.301669	0.337003	0.372123	0.323979	0.342334	0.322715	0.302633	0.295397	0.330318	0.302624	0.0488132	0.0451379	0.0488804	0.0479295	0.0515504	0.0461069	0.171338	0.186314	0.188417
D167	1,7,7-Trimethylbicyclo[2.2.1]heptan-2-ol	Terpenoids	C10H18O	10385-78-1	0.13067	0.133604	0.143336	0.109	0.140421	0.117128	0.306487	0.379109	0.305768	0.306294	0.409931	0.29588	0.400103	0.368113	0.324123	0.335737	0.0207891	0.324444	0.10974	0.0916217	0.0868393	0.0959015	0.0791788	0.107983	0.165997	0.198288	0.200771
XMW0013	1,7,7-trimethyl-Tricyclo[2.2.1.0(2,6)]heptane	Terpenoids	C10H16	508-32-7	0.392327	0.412162	0.476249	0.453169	0.428188	0.434924	2.49205	2.03593	2.34079	2.61457	2.28069	2.4629	2.18075	2.14082	2.02911	1.95473	2.11836	1.99365	0.2435	0.238972	0.258253	0.26339	0.283978	0.227573	1.02706	0.952824	1.16377
XMW0671	1,7-Diazabicyclo[2.2.0]heptane	Heterocyclic compound	C5H10N2	279-42-5	0.0985664	0.0976223	0.112664	0.102771	0.104839	0.100307	0.359571	0.37168	0.339312	0.378393	0.427619	0.346255	0.390889	0.365591	0.401562	0.334431	0.438323	0.337746	0.0366131	0.0333051	0.0350697	0.0285179	0.0302377	0.0337712	0.192674	0.206059	0.212264
WMW0105	1,7-Nonadiene, 4,8-dimethyl-	Hydrocarbons	C11H20	62108-28-5	0.665456	0.663327	0.904395	0.905066	0.904731	0.606883	4.36834	5.28515	4.3592	4.42843	5.94732	4.20226	5.31112	4.75434	4.49718	4.45248	5.27252	4.33242	1.11138	1.03817	1.04964	1.04384	1.07813	1.1017	2.60179	2.78826	2.75014
XMW0793	1,7-Octadiene, 2,7-dimethyl-3,6-bis(methylene)-	Hydrocarbons	C12H18	16714-60-6	22.6136	21.8467	24.8641	20.9791	21.3726	20.1994	2.20846	2.56688	2.1779	2.3301	3.05338	2.33168	2.78806	2.47075	2.41865	2.41814	2.90551	2.43079	12.3264	12.2353	11.334	11.4559	11.7741	12.8518	66.598	75.9194	75.2137
XMW0521	1,7-Octadiene, 2-methyl-6-methylene-	Terpenoids	C10H16	1686-30-2	9.03079	9.11957	9.86954	9.2255	9.36312	8.5839	30.2909	33.0189	28.4634	31.7345	37.9762	29.8279	34.7327	31.7059	30.2977	29.3397	34.1438	29.4336	6.56629	5.95264	6.09022	6.06524	6.35848	6.11032	15.774	16.3386	17.9595
NMW0287	1,8,11,14-Heptadecatetraene, (Z,Z,Z)-	Hydrocarbons	C17H28	10482-53-8	0.167045	0.104462	0.108836	0.095743	0.117292	0.121689	0.214021	0.251985	0.238579	0.218528	0.255494	0.148658	0.103038	0.112708	0.11098	0.111738	0.179595	0.0891337	0.085687	0.0845977	0.0652863	0.0678982	0.0643256	0.119521	0.0804507	0.10218	0.101033
XMW0231*075	1-((1S,3aR,4R,7S,7aS)-4-Hydroxy-7-isopropyl-4-methyloctahydro-1H-inden-1-yl)ethanone	Terpenoids	C15H26O2	1911-78-0	0.000264904	0.000254285	0.00128311	0.000251376	0.00025506	0.000238074	0.00925905	0.0122487	0.00856319	0.00949832	0.0118937	0.00956212	0.0426296	0.0413601	0.0361091	0.0373493	0.0446783	0.0346978	0.00201162	0.00198454	0.00158041	0.00171496	0.00155455	0.00175855	0.0109246	0.0122801	0.0120821
XMW0184	1-(1-Adamantyl)-1-phenylethanol	Aromatics	C18H24O	303797-64-0	0.0124725	0.00989394	0.00964128	0.00490075	0.00886379	0.00778834	0.0150415	0.0310757	0.0181454	0.0192756	0.0311068	0.0155745	0.0186966	0.0164522	0.016135	0.014078	0.0185966	0.0127386	0.00470193	0.0100804	0.00402312	0.00721235	0.00426146	0.0106644	0.00744228	0.0117526	0.00818078
XMW0167	1-(2,3,4,5-Tetramethylphenyl)ethanone	Ketone	C12H16O	34764-71-1	0.140178	0.127722	0.135897	0.131498	0.135595	0.123738	0.157001	0.00989733	0.146112	0.00898434	0.0117732	0.142607	0.312196	0.275355	0.257117	0.254222	0.311061	0.26006	0.0524142	0.0456471	0.0442173	0.0466095	0.0470856	0.0543903	0.111501	0.149622	0.138977
XMW1429	1-(2-Hydroxyethyl)-1,2,4-triazole	Heterocyclic compound	C4H7N3O	3273-14-1	0.535136	0.506017	0.565184	0.470218	0.508991	0.445837	0.458267	1.46712	0.415481	0.429321	1.48634	0.363245	0.0868687	0.0769822	0.0753589	0.0753428	0.0905279	0.075737	0.484062	0.482676	0.438312	0.45699	0.439909	0.500616	0.376573	0.353156	0.367582
KMW0378*036	1-(4-methylphenyl)-Ethanone	Ketone	C9H10O	122-00-9	0.357031	0.313782	0.32318	0.285796	0.329819	0.277673	0.954594	1.09261	0.996389	0.977067	1.24359	0.616682	1.18204	1.07503	0.961167	0.966774	1.27116	0.907837	0.2072	0.196393	0.179225	0.173331	0.177115	0.217427	0.435135	0.445474	0.435361
XMW1273	1-(5-Dimethylethyl)pyrazin-2-yl-ethan-1-one	Heterocyclic compound	C10H14N2O	182306-61-2	0.00247426	0.00310935	0.0042491	0.00375188	0.0040286	0.00317441	0.0105162	0.0134138	0.00711022	0.0118767	0.0163253	0.0142407	0.00394351	0.00304795	0.00357738	0.00277684	0.0035643	0.00232508	0.000920571	0.000760206	0.000985127	0.00114366	0.00109078	0.00108218	0.0046334	0.00589114	0.00563601
XMW0283	1-(Furan-2-yl)-2-methylpentan-1-one	Heterocyclic compound	C10H14O2	1248070-62-3	0.438679	0.492951	0.535197	0.480648	0.47651	0.427011	1.03456	1.14823	0.960549	1.05318	1.34791	1.00102	1.48387	1.31783	1.2593	1.25451	1.43286	1.23515	0.200704	0.176782	0.18211	0.185514	0.20588	0.197088	0.634079	0.706077	0.683848
XMW0783	1-Adamantanol	Alcohol	C10H16O	768-95-6	0.189797	0.166462	0.19323	0.15982	0.183378	0.141718	0.0107187	0.0124583	0.0105704	0.0113091	0.0148195	0.0113168	0.0135318	0.0119918	0.0117389	0.0117364	0.319514	0.0117978	0.0859962	0.0826015	0.0591998	0.0543414	0.0754926	0.117557	0.192667	0.235148	0.194623
XMW0470	1-ButanAmine, N-(2-pyridinylmethylene)-	Heterocyclic compound	C10H14N2	7032-24-8	0.0329048	0.0265599	0.020058	0.0259067	0.0305299	0.026124	0.00261713	0.00304188	0.00258091	0.00276127	0.0036184	0.00276316	0.00330399	0.00292796	0.00286622	0.00286561	0.00344316	0.026165	0.0164095	0.014047	0.0132473	0.0156781	0.0165051	0.0177296	0.0269036	0.0260821	0.0230604
KMW0454	1-Cyclohexene-1-carboxAldehyde, 4-(1-methylethenyl)-	Aldehyde	C10H14O	2111-75-3	0.210224	0.292415	0.328643	0.302422	0.29039	0.254662	0.267845	0.335958	0.183363	0.325351	0.324728	0.316362	0.288697	0.26348	0.226157	0.230024	0.343096	0.235959	0.16323	0.135549	0.142062	0.15607	0.176175	0.156481	0.224806	0.253418	0.250052
KMW0489	1-Cyclohexene-1-carboxAldehyde, 4-(1-methylethenyl)-, (S)-	Aldehyde	C10H14O	18031-40-8	0.68086	0.647065	0.6285	0.607239	0.645284	0.584751	0.609698	0.70826	0.597937	0.598257	0.738927	0.569791	0.669806	0.591872	0.543628	0.568768	0.583093	0.532666	0.691803	0.643396	0.594204	0.599812	0.592389	0.719185	0.571497	0.578492	0.612607
NMW0211	1-Cyclohexene-1-carboxylic acid, 4-(1-methylethenyl)-	Terpenoids	C10H14O2	7694-45-3	1.14949	0.946046	1.14813	0.947603	1.02818	0.930228	1.59193	1.12659	0.960302	1.00636	1.30612	1.01823	2.80005	2.48923	2.5192	2.27218	2.74874	2.24232	0.356941	0.329466	0.314422	0.307573	0.313657	0.364811	1.12817	0.900185	0.855945
XMW1260	1-Cyclohexene-1-propanol, .alpha.,2,6,6-tetramethyl-	Alcohol	C13H24O	3293-47-8	0.865257	0.757417	0.127395	0.760054	0.802908	0.720744	0.992936	1.11212	0.942966	0.995619	1.29448	0.976526	1.23324	1.07059	1.03466	0.985093	1.17801	0.0291172	0.48552	0.445068	0.423379	0.434928	0.448684	0.505525	0.164001	0.184187	0.163613
XMW1074	1-Cyclopentene-1-methanol, 2-methyl-5-(1-methylethyl)-	Alcohol	C10H18O	80113-82-2	0.0744059	0.0776314	0.0614457	0.0661001	0.0810292	0.0654055	0.118298	0.159133	0.117824	0.121603	0.189938	0.108947	0.0835751	0.0752292	0.0742514	0.0748445	0.0858387	0.0708269	0.0673695	0.0580853	0.0552438	0.0581286	0.0527755	0.0666089	0.0584762	0.0797652	0.0743567
KMW0456	1-Decanol	Alcohol	C10H22O	112-30-1	0.845955	1.16534	1.2962	1.18861	1.14596	1.00327	1.08832	1.40046	0.737954	1.33883	1.88902	1.28707	1.18133	1.08528	0.923246	1.27922	1.17039	0.937105	0.629893	0.533478	0.557126	0.7043	0.807598	0.614871	1.0703	1.2936	1.17307
KMW0629	1-Dodecanol	Alcohol	C12H26O	112-53-8	0.768927	0.816664	0.736687	0.818339	0.881235	0.801658	1.63254	0.896563	1.5245	1.7323	2.13714	0.618085	2.6397	2.34165	2.23686	2.23291	2.66737	2.17579	0.266279	0.151817	0.144846	0.233431	0.233642	0.174853	0.516466	0.695135	0.649326
KMW0159	1-Heptanol	Alcohol	C7H16O	111-70-6	0.0764787	0.0751252	0.0893013	0.0831161	0.0825553	0.0721256	0.300712	0.272792	0.266083	0.311957	0.311315	0.296506	0.344389	0.31606	0.30162	0.293672	0.340883	0.291437	0.0669395	0.0615621	0.0629309	0.0615834	0.0633279	0.0629094	0.154101	0.178654	0.170424
XMW0890	1-Hepten-6-one, 2-methyl-	Ketone	C8H14O	10408-15-8	0.872118	0.879679	0.949121	0.781442	0.897389	0.734558	2.80269	3.08965	2.67829	2.89322	3.56407	2.79428	3.1416	2.81418	2.76614	2.69091	3.14515	2.64698	0.66841	0.609294	0.625802	0.43729	0.462386	0.623008	1.57274	1.8086	1.7645
KMW0706	1-Hexadecanol	Alcohol	C16H34O	36653-82-4	0.0539337	0.0458215	0.0552536	0.032996	0.0480926	0.0475468	0.0269077	0.0370382	0.0271347	0.029704	0.0372453	0.0306386	0.226011	0.216604	0.209433	0.202372	0.266887	0.196503	0.0477289	0.047802	0.0388954	0.045719	0.0371405	0.0543275	0.0659932	0.0809452	0.0855678
KMW0142	1-Hexanethiol	Sulfur compounds	C6H14S	111-31-9	0.0215722	0.0214196	0.0239579	0.0229431	0.022799	0.0217569	0.0757656	0.0749789	0.0692218	0.0803645	0.0876222	0.071808	0.0962052	0.0893712	0.0852233	0.0825551	0.0930594	0.0841386	0.0083436	0.00747702	0.00725149	0.00709974	0.00716736	0.00749321	0.0368632	0.0457355	0.0416733
KMW0133	1-Hexanol, 4-methyl-	Alcohol	C7H16O	818-49-5	0.0194115	0.0192495	0.0193255	0.017944	0.0198483	0.0182681	0.082952	0.0849311	0.0778469	0.0867044	0.0972509	0.0831693	0.0890981	0.0830481	0.0776993	0.0752944	0.0839847	0.0775153	0.0157166	0.00825437	0.0107492	0.0114263	0.0111658	0.00798532	0.038158	0.0409542	0.043327
D457	1-Hexanol, 5-methyl-2-(1-methylethyl)-, acetate	Ester	C12H24O2	40853-55-2	0.366075	0.383589	0.409527	0.377108	0.465406	0.40478	0.427594	0.525278	0.316913	0.503344	0.73416	0.485834	0.684691	0.622125	0.505476	0.562988	0.660249	0.555261	0.227136	0.192409	0.199615	0.213717	0.242284	0.220967	0.420572	0.450097	0.449629
XMW0958	1-Iodoundecane	Halogenated hydrocarbons	C11H23I	4282-44-4	1.06547	0.984075	1.02321	0.957251	0.989923	0.900642	0.901511	1.17692	0.915193	1.08124	1.13968	0.933663	1.28616	1.05615	1.04729	0.843063	1.01308	0.902582	0.601324	0.735453	0.710735	0.717082	0.714784	0.786375	0.853216	1.19805	1.11141
XMW0465*060	1-Isopropyl-4,7-dimethyl-1,2,3,4,5,6-hexahydronaphthalene	Terpenoids	C15H24	16729-00-3	1.38129	1.17438	1.38836	1.22475	1.25622	1.15529	1.63618	2.37179	1.53519	2.15426	2.06958	1.34134	2.97935	3.29017	2.45072	2.43009	2.99291	2.48644	0.533252	0.467988	0.450129	0.473433	0.476968	0.550091	1.48407	1.87349	1.69645
XMW1165*059	1-Isopropyl-4,7-dimethyl-1,2,3,5,6,8a-hexahydronaphthalene	Terpenoids	C15H24	16729-01-4	1.2722	1.22488	3.36954	2.9451	3.08529	1.14707	3.68465	4.01576	7.39208	3.49968	10.494	4.02575	9.08528	8.12691	7.80556	7.23031	8.65567	6.8795	1.84874	1.68732	1.60256	1.66806	1.72298	1.91821	4.54169	5.01238	4.47171
XMW0490	1-Methyl-2-phenylcyclopropane	Aromatics	C10H12	3145-76-4	1.70465	1.65906	1.86386	1.74985	1.76226	1.51742	0.237993	0.276619	0.2347	0.251102	0.329046	0.251273	0.300454	0.26626	0.260645	0.26059	0.31311	0.261953	1.37778	1.28194	1.25082	1.2645	1.29251	1.34932	3.73166	4.07384	4.05343
NMW0235	1-NaphthalenecarboxAldehyde	Aldehyde	C11H8O	66-77-3	0.00877385	0.0098283	0.00831912	0.00951646	0.0106144	0.00952904	0.00142094	0.00165155	0.00140128	0.0014992	0.00196457	0.00150022	0.00179386	0.0015897	0.00155618	0.00155585	0.00186943	0.00156399	0.00901909	0.00781258	0.00719245	0.00762288	0.00836875	0.00916248	0.0113495	0.0152805	0.0139886
NMW0250	1-Naphthalenemethanol	Alcohol	C11H10O	4780-79-4	0.0804567	0.0593084	0.0683921	0.0554217	0.0584787	0.0619059	0.114869	0.103905	0.117298	0.0892303	0.110173	0.0656075	0.0634795	0.0757974	0.0566754	0.0521871	0.0904115	0.0626449	0.0506031	0.0497489	0.0453312	0.0468719	0.0483145	0.0412826	0.0630357	0.0620635	0.0646471
KMW0344	1-Nonanol	Alcohol	C9H20O	143-08-8	0.535934	0.490212	0.499962	0.476774	0.486812	0.433988	0.352876	0.421144	0.344431	0.349069	0.485341	0.370662	0.442774	0.382126	0.354478	0.367457	0.356311	0.352651	0.477268	0.470126	0.432018	0.432354	0.446999	0.495223	0.459065	0.516505	0.480455
WMW0092	1-OctanAmine,N-methyl-	Amine	C9H21N	2439-54-5	0.0898793	0.0870917	0.0915722	0.0858545	0.0872346	0.0796166	0.0657212	0.0747204	0.0618624	0.0661542	0.0121016	0.00924125	0.142506	0.00979243	0.00958594	0.0983031	0.0996492	0.0963445	0.0512625	0.0500147	0.0443049	0.0462735	0.0448736	0.0550609	0.085243	0.0958269	0.0842389
KMW0173	1-Octen-3-ol	Alcohol	C8H16O	3391-86-4	0.0129422	0.0112422	0.0120648	0.00999974	0.0120013	0.00977049	0.013977	0.0148848	0.0137466	0.014782	0.0175745	0.0112977	0.0169543	0.014942	0.0141567	0.0143124	0.017819	0.0140166	0.0125832	0.0114894	0.01095	0.0106546	0.0106712	0.0154232	0.0110339	0.0125556	0.0118463
KMW0170	1-Octen-3-one	Ketone	C8H14O	4312-99-6	0.602265	0.609281	0.661806	0.512706	0.620455	0.409668	1.9061	1.9831	1.70075	1.99623	2.28436	1.78361	2.20483	2.00659	1.92493	1.86773	2.0433	1.86469	0.381223	0.342774	0.347114	0.366462	0.357834	0.348578	0.920088	1.15533	1.15763
XMW1308	1-Octyl trifluoroacetate	Ester	C10H17F3O2	2561-21-9	0.00349348	0.00332143	0.00374897	0.00332364	0.0035857	0.00322683	0.000417358	0.000485094	0.000411582	0.000440345	0.000577032	0.000440645	0.000526893	0.000466927	0.000457081	0.000456984	0.000549087	0.000459375	0.00239	0.00223728	0.00213153	0.00251827	0.00243313	0.00256745	0.010637	0.0107787	0.0105162
WMW0130	1-Pentadecene	Hydrocarbons	C15H30	13360-61-7	0.0069005	0.00605424	0.00683634	0.00624276	0.00633204	0.00576187	0.00126874	0.00147465	0.00125118	0.00133862	0.00175414	0.00133953	0.00160172	0.00141943	0.0013895	0.0013892	0.00166919	0.00139647	0.00918017	0.00829558	0.00800429	0.00815588	0.00855199	0.00984513	0.00919286	0.00996614	0.00907139
XMW1091	1-Pentanol, 5-[(tetrahydro-2H-pyran-2-yl)oxy]-	Heterocyclic compound	C10H20O3	76102-74-4	0.0136938	0.0112631	0.0154171	0.0118216	0.0127345	0.0118527	0.0166632	0.0204421	0.0154767	0.0172499	0.021253	0.0127923	0.0216976	0.0175467	0.0186789	0.0150897	0.0180493	0.0161639	0.00801861	0.00129604	0.00611896	0.00687345	0.00674307	0.00793374	0.0109959	0.015155	0.0148197
XMW0358	1-Pentanone, 1-(2-furanyl)-	Heterocyclic compound	C9H12O2	3194-17-0	0.168176	0.102127	0.106783	0.0894358	0.119904	0.147019	0.597783	0.593587	0.877738	0.669229	0.528377	0.311431	0.446532	0.508521	0.409154	0.387228	0.436065	0.402307	0.0928568	0.0818371	0.0701407	0.0725303	0.0818038	0.111107	0.296025	0.311908	0.265149
XMW0921	1-Pentanone, 1-(2-thienyl)-	Heterocyclic compound	C9H12OS	53119-25-8	0.0173193	0.0157597	0.0181252	0.0145982	0.0173832	0.0137931	0.0608383	0.0742292	0.0668314	0.0679931	0.0874032	0.0545774	0.080254	0.080583	0.0713969	0.0715792	0.0874389	0.0600648	0.00904127	0.00843808	0.00748312	0.00683018	0.00828201	0.0103896	0.0223475	0.0261096	0.0367215
XMW0087	1-Pentanone, 1-(p-anisyl)-3-methyl-	Ketone	C13H18O2	66333-82-2	3.74064	2.80727	3.50308	2.37629	3.55624	2.19469	0.384818	0.447272	0.379492	0.406013	0.532043	0.406289	0.485812	0.430522	0.421444	0.421354	0.506276	0.423558	2.31333	2.27558	2.22105	2.0852	1.99005	2.18175	4.6673	4.10074	3.70395
D102	1-Pentanone, 1-phenyl-	Ketone	C11H14O	1009-14-9	1.13792	0.993178	1.14571	0.988985	1.04083	0.954893	3.41718	3.90376	3.1998	3.52225	4.41446	2.66995	5.09673	4.50289	4.29183	4.04014	4.8222	3.8104	0.9351	0.842427	0.801626	0.835825	0.84939	0.960731	2.04329	2.21338	1.98616
XMW1018	1-PhenylcyclohexylAmine	Amine	C12H17N	2201-24-3	1.23732	0.972666	1.19323	0.950119	1.13117	0.900512	4.44787	5.08119	4.21989	4.61088	5.80273	3.53219	4.20477	3.56172	3.42259	3.67729	4.41	3.53781	0.980896	0.911144	0.849729	0.87997	0.881316	1.03998	2.24468	2.5269	2.31112
KMW0160	1-Propanol, 3-(methylthio)-	Alcohol	C4H10OS	505-10-2	0.348444	0.354325	0.379927	0.313766	0.36102	0.294491	1.2569	1.36413	1.18361	1.35125	1.571	1.24132	1.47882	1.34915	1.29179	1.26418	1.41062	1.25244	0.269403	0.244202	0.251339	0.250359	0.264874	0.249491	0.632116	0.721821	0.715307
XMW1476	1-Propanone, 1-(4-methoxyphenyl)-	Ketone	C10H12O2	121-97-1	2.62628	2.99648	2.61807	2.90166	2.66581	2.59682	7.34761	14.7586	7.00721	12.2607	9.79761	7.60678	26.337	23.1367	22.3344	19.7587	23.8639	14.4632	3.95273	2.76809	2.61752	2.59177	3.58211	4.09635	4.85725	6.60983	6.2437
KMW0726	1-Tetradecanol	Alcohol	C14H30O	112-72-1	0.0690429	0.0528933	0.0592842	0.0516618	0.0555337	0.0553053	0.11254	0.133287	0.123458	0.105611	0.134519	0.200985	0.180857	0.17027	0.165511	0.155666	0.191801	0.155728	0.0309387	0.0336955	0.0275737	0.028954	0.025922	0.0380951	0.101199	0.130327	0.140815
D266	1-Tridecene	Hydrocarbons	C13H26	2437-56-1	4.13769	4.05338	4.24774	3.90901	4.01765	3.58579	13.6101	15.5784	13.2679	13.635	17.4521	13.3219	13.6578	12.0383	11.6166	11.5038	13.4343	11.3047	3.32261	3.17085	3.03002	2.99677	3.01472	3.325	7.12066	8.59068	7.90471
XMW0775	1-Undecene, 9-methyl-	Hydrocarbons	C12H24	74630-41-4	0.108962	0.0661561	0.0650617	0.0523012	0.0705692	0.0704744	0.119817	0.125611	0.144722	0.106962	0.144009	0.0773097	0.106879	0.0700468	0.0723083	0.074981	0.0900347	0.0931621	0.0628445	0.0660817	0.0491922	0.0517767	0.0469403	0.0883845	0.0582465	0.0570911	0.0531005
WMW0122	1-Undecyn-4-ol	Alcohol	C11H20O	22127-86-2	0.626464	0.728528	0.809242	0.75063	0.722371	0.820665	0.725621	0.905521	0.511731	0.879226	1.07219	0.845798	1.0573	0.951059	0.587429	0.607437	0.962089	0.850331	0.419202	0.35558	0.36977	0.467924	0.448667	0.402898	0.555621	0.631107	0.624013
NMW0036	1-ethenyl-2-Pyrrolidinone	Heterocyclic compound	C6H9NO	88-12-0	1.31951	1.24444	1.38615	1.17143	1.26627	1.20704	2.60509	3.00419	2.35916	2.70617	3.48169	2.24478	0.286148	0.253581	0.248234	0.248181	0.298201	0.24948	1.34749	1.21503	1.20659	1.22839	1.2559	1.35009	1.3519	1.75306	1.69979
NMW0061	1-methyl-2-nitro-Benzene	Aromatics	C7H7NO2	88-72-2	0.0136525	0.0136566	0.0138285	0.0114695	0.013491	0.0103247	0.0377091	0.0411928	0.0336861	0.0352261	0.0374152	0.0204536	0.0375732	0.032429	0.0280644	0.0304479	0.0382611	0.0294956	0.00556102	0.00597253	0.00456199	0.0046471	0.00525296	0.00739598	0.026514	0.0265773	0.0194695
D338	1-methyl-4-(1,2,2-trimethylcyclopentyl)cyclohexa-1,3-diene	Terpenoids	C15H24	29621-78-1	5.17921	5.53379	4.78743	5.45773	5.11546	4.94638	12.7492	14.7991	12.0637	13.0797	16.9832	13.0202	14.3524	12.7629	11.981	15.6644	18.2923	15.0574	6.00057	5.45095	5.14842	5.35474	5.43082	6.26105	8.08802	11.773	10.9873
NMW0004	1-methyl-4-(1-methylethenyl)-1,2-Cyclohexanediol	Terpenoids	C10H18O2	1946-00-5	0.069932	0.0628893	0.0693324	0.0619321	0.0691798	0.0573899	0.235984	0.264016	0.270776	0.257549	0.360458	0.206442	0.425111	0.434716	0.37173	0.377454	0.471027	0.329138	0.0549279	0.0565607	0.0498374	0.0528373	0.0520385	0.0639612	0.0931957	0.106509	0.174067
XMW0742	10,10-Dimethyl-2,6-dimethylenebicyclo[7.2.0]undecane	Terpenoids	C15H24	357414-37-0	1.03901	0.903242	1.01422	0.553747	0.942143	0.866407	1.4004	1.49226	1.36557	1.40153	1.81097	1.58941	1.6196	1.45271	1.41962	1.32851	1.81963	1.46526	0.41252	0.397292	0.376222	0.370448	0.364678	0.443058	0.863831	1.08657	0.985548
XMW0294	10-Undecenal	Aldehyde	C11H20O	112-45-8	36.3208	34.9816	38.9001	34.3393	34.6259	31.8029	130.023	148.248	125.099	129.278	162.308	126.548	125.632	112.318	107.488	107.408	121.876	103.853	31.215	29.3954	28.5984	28.5493	28.8075	31.7539	66.0814	77.4069	72.0058
KMW0693*135	10-epi-.gamma.-Eudesmol	Terpenoids	C15H26O	15051-81-7	0.00687872	0.00469428	0.00666403	0.00613667	0.00628546	0.00648655	0.0147275	0.017572	0.0139263	0.015812	0.0202833	0.017232	0.00666594	0.000605353	0.00545713	0.00598695	0.00785744	0.0101724	0.00302005	0.00365914	0.00286235	0.00320199	0.00388134	0.00459783	0.00828077	0.00936054	0.00872151
XMW1177	11,11-Dimethyl-4,8-dimethylenebicyclo[7.2.0]undecan-3-ol	Alcohol	C15H24O	79580-01-1	0.609623	0.424754	0.446117	0.390503	0.463867	0.449788	0.723337	1.12932	0.833969	0.718605	1.17715	0.707982	0.61465	0.567021	0.542497	0.534506	0.72275	0.527781	0.326943	0.329365	0.266342	0.278364	0.258458	0.418862	0.383879	0.411183	0.412096
D400*124	11-Tetradecen-1-ol, (E)-	Alcohol	C14H28O	35153-18-5	0.0973187	0.0616871	0.0644318	0.045337	0.0700493	0.0707087	0.126279	0.152585	0.141169	0.128598	0.150191	0.08546	0.070741	0.0645519	0.0632213	0.0634013	0.0839771	0.0616676	0.0507855	0.0516568	0.037598	0.0406618	0.0381434	0.0725886	0.0558296	0.048103	0.0459071
XMW0441	1H-1,2,4-Triazole, 3-chloro-	Heterocyclic compound	C2H2ClN3	6818-99-1	0.144656	0.135691	0.142002	0.143518	0.14729	0.138864	0.122245	0.104189	0.113998	0.117018	0.149769	0.115747	0.0226333	0.0200574	0.0196345	0.0196303	0.0235867	0.019733	0.129808	0.151174	0.13896	0.140601	0.116901	0.159126	0.125569	0.140984	0.124435
KMW0636	1H-3a,7-Methanoazulen-5-ol, octahydro-3,8,8-trimethyl-6-methylene-	Terpenoids	C15H24O	28231-03-0	0.110975	0.0769652	0.0504235	0.0703654	0.0856516	0.0845387	0.133529	0.158088	0.138923	0.139803	0.162132	0.0844549	0.080391	0.0749109	0.0602309	0.0642149	0.079741	0.0659568	0.010486	0.010071	0.00950964	0.00952469	0.0094139	0.0106516	0.0676655	0.0791944	0.0495483
XMW0504*084	1H-Benzocycloheptene, 2,4a,5,6,7,8-hexahydro-3,5,5,9-tetramethyl-, (R)-	Terpenoids	C15H24	1461-03-6	3.36921	3.37559	3.50107	3.53808	2.46219	2.19359	8.263	9.76708	7.44052	8.62997	11.1597	7.45438	8.73431	7.80235	7.5202	6.80263	7.9215	6.44661	2.12909	1.91835	1.85002	1.89975	2.00592	2.13375	4.57302	5.37426	5.1102
KMW0210	1H-Cyclopenta[1,3]cyclopropa[1,2]benzene, octahydro-7-methyl-3-methylene-4-(1-methylethyl)-, [3aS-(3a.alpha.,3b.beta.,4.beta.,7.alpha.,7aS*)]-	Terpenoids	C15H24	13744-15-5	8.15869	7.09624	8.17981	6.99359	7.46479	6.78682	24.212	27.7051	22.7259	24.9954	31.3844	18.526	36.3022	32.2494	31.0561	28.8267	34.6871	27.1369	5.78519	5.22484	5.74874	5.4835	5.49641	5.93916	14.7405	15.8073	14.0502
KMW0644*118	1H-Cycloprop[e]azulen-7-ol, decahydro-1,1,7-trimethyl-4-methylene-, [1ar-(1a.alpha.,4a.alpha.,7.beta.,7a.beta.,7b.alpha.)]-	Terpenoids	C15H24O	6750-60-3	0.213469	0.110491	0.128207	0.103266	0.139796	0.145014	0.160109	0.181898	0.189228	0.171828	0.167192	0.0880429	0.0755778	0.0688127	0.0752343	0.0655003	0.0856002	0.0716429	0.119925	0.122077	0.0859195	0.0968977	0.0995634	0.185382	0.0911428	0.0865051	0.078864
XMW1408	1H-Cyclopropa[a]naphthalene, 1a,2,3,3a,4,5,6,7b-octahydro-1,1,3a,7-tetramethyl-, [1aR-(1a.alpha.,3a.alpha.,7b.alpha.)]-	Terpenoids	C15H24	489-29-2	0.311171	0.29993	0.313843	0.298541	0.287304	0.286975	1.04001	1.18982	0.98099	1.0669	1.35024	0.799439	1.56684	1.37735	1.33216	1.22828	1.48621	1.16022	0.250683	0.23054	0.215242	0.227096	0.227489	0.256411	0.627304	0.676301	0.601321
XMW0380*056	1H-Cyclopropa[a]naphthalene, 1a,2,3,5,6,7,7a,7b-octahydro-1,1,7,7a-tetramethyl-, [1aR-(1a.alpha.,7.alpha.,7a.alpha.,7b.alpha.)]-	Terpenoids	C15H24	17334-55-3	36.2324	33.5092	35.8864	32.946	33.9461	31.1176	31.1113	84.1435	67.9344	74.6427	95.6135	65.2702	78.1049	70.5095	67.1523	64.0494	76.5815	61.472	6.94583	6.67098	6.29911	6.30908	6.2357	7.05552	45.8525	51.6894	46.6785
XMW0910	1H-Imidazole, 1-acetyl-	Heterocyclic compound	C5H6N2O	2466-76-4	0.130394	0.13334	0.147706	0.135943	0.136175	0.127471	0.63836	0.653625	0.599872	0.669252	0.750125	0.64858	0.676721	0.635707	0.599747	0.583832	0.653193	0.595304	0.0969807	0.0810526	0.084926	0.0855062	0.0898429	0.0870191	0.296921	0.314529	0.333767
XMW0644	1H-Imidazole, 2-propyl-	Heterocyclic compound	C6H10N2	50995-95-4	0.119163	0.114429	0.110965	0.109849	0.113171	0.0964945	0.082063	0.0810139	0.0955694	0.0711137	0.0777516	0.0639661	0.0141991	0.0125831	0.0123178	0.0123152	0.0147972	0.0123796	0.108592	0.102757	0.0957164	0.100971	0.0963745	0.112672	0.0798917	0.0774644	0.0807708
NMW0118	1H-Inden-1-one, 2,3-dihydro-	Ketone	C9H8O	83-33-0	0.0991781	0.0960296	0.10432	0.0927319	0.0942753	0.0861814	0.356231	0.406933	0.344159	0.351054	0.443117	0.347517	0.34666	0.306379	0.29592	0.294334	0.340269	0.286551	0.0860139	0.0806312	0.0791316	0.077758	0.0783161	0.0862634	0.18219	0.213143	0.200644
XMW1395	1H-Indene, 3-methyl-	Aromatics	C10H10	767-60-2	0.0743337	0.0690352	0.0691581	0.0670386	0.0699753	0.058486	0.0454437	0.0539213	0.0442625	0.0451372	0.0569533	0.04436	0.0543335	0.0489092	0.0434994	0.044277	0.0439185	0.0424902	0.0647139	0.0613247	0.0561618	0.0578983	0.0586394	0.0679664	0.0429607	0.05295	0.0593053
NMW0772	1H-Pyrazole	Heterocyclic compound	C3H4N2	288-13-1	0.0174195	0.0120599	0.0122952	0.00857682	0.0114213	0.0115346	0.026604	0.0198823	0.0302751	0.0198466	0.0172788	0.00994354	0.0119051	0.0104726	0.0122523	0.012265	0.0163957	0.0139319	0.00762016	0.00863034	0.00684076	0.00719952	0.00574331	0.0139991	0.00876692	0.00707142	0.00725488
XMW0532	1H-Pyrazole-1-carboximidamide, 3,5-dimethyl-	Heterocyclic compound	C6H10N4	22906-75-8	1.52065	1.44322	1.59013	1.35218	1.4355	1.26699	1.20767	1.21343	1.18891	1.05672	1.24026	0.983023	0.226498	0.20072	0.196488	0.196446	0.236039	0.197474	1.42375	1.41847	1.2978	1.3405	1.29599	1.47051	1.44982	1.53961	1.4962
XMW0206	1H-Pyrazolo[3,4-d]pyrimidin-4-amine	Heterocyclic compound	C5H5N5	2380-63-4	0.274771	0.200784	0.211056	0.186819	0.220156	0.213984	0.714432	0.849958	0.766961	0.714368	0.920183	0.547641	0.568154	0.507738	0.50269	0.480762	0.647132	0.477937	0.177869	0.20639	0.167902	0.173314	0.156164	0.246121	0.292484	0.311655	0.319334
XMW0123	1H-Pyrrole-2,5-dione	Heterocyclic compound	C4H3NO2	541-59-3	0.0219614	0.0195227	0.0197782	0.0168813	0.0183613	0.0193032	0.0129607	0.0118188	0.0131797	0.0125068	0.0139301	0.0124376	0.0122867	0.0107435	0.0103422	0.0102002	0.0109222	0.0109964	0.013776	0.0143058	0.0145645	0.0145687	0.0150294	0.0161797	0.0131726	0.0126093	0.0119
XMW1141	1H-Pyrrole-2,5-dione, 3-ethenyl-4-methyl-	Heterocyclic compound	C7H7NO2	21494-57-5	0.201792	0.196175	0.220085	0.192411	0.196048	0.118149	0.448944	0.476999	0.43277	0.449804	0.557793	0.442591	0.699357	0.609232	0.615512	0.602987	0.670833	0.610187	0.0365573	0.0338774	0.0333498	0.031937	0.0345397	0.035283	0.305436	0.351634	0.33406
XMW0223	1H-Pyrrole-2,5-dione, 3-ethyl-4-methyl-	Heterocyclic compound	C7H9NO2	20189-42-8	0.218963	0.20708	0.208659	0.207777	0.209118	0.203725	0.188949	0.222689	0.177724	0.185382	0.236444	0.178209	0.219026	0.188076	0.176876	0.186842	0.176741	0.172128	0.194906	0.222425	0.255006	0.203895	0.174805	0.231573	0.219513	0.259625	0.187682
XMW0483	1H-Pyrrole-2-carboxAldehyde	Heterocyclic compound	C5H5NO	1003-29-8	0.0570339	0.15342	0.161683	0.142338	0.15462	0.144332	0.148523	0.145508	0.163194	0.141578	0.157353	0.0771146	0.182487	0.00487856	0.158204	0.159021	0.147158	0.157449	0.0243387	0.03911	0.0239898	0.0815452	0.0824115	0.0436545	0.124789	0.118579	0.118063
XMW0129	1H-Pyrrolizine-1-methanol, hexahydro-7-hydroxy-, [1S-(1.alpha.,7.alpha.,7a.beta.)]-	Heterocyclic compound	C8H15NO2	520-62-7	1.34468	1.33683	1.14251	1.21573	1.12194	1.27748	1.26729	1.41475	1.6515	1.21434	1.38235	1.29113	0.918978	0.871325	0.849491	0.823905	1.20456	0.846438	0.162517	0.156086	0.147385	0.147618	0.145901	0.165083	0.828337	1.09958	0.865075
XMW0701	1H-Pyrrolo[2,3-b]pyridine, 2-(1-methylethyl)-	Heterocyclic compound	C10H12N2	27257-18-7	0.111854	0.0984069	0.114246	0.0974341	0.103597	0.10278	0.313197	0.359263	0.295123	0.324543	0.406115	0.244627	0.469697	0.414967	0.403036	0.375111	0.450957	0.350313	0.079395	0.0859641	0.0813237	0.0716853	0.0712573	0.0952978	0.193464	0.209487	0.184162
XMW0148	1H-Tetrazol-5-amine	Heterocyclic compound	CH3N5	4418-61-5	0.00240148	0.0115261	0.0151267	0.0116502	0.0140164	0.0118621	0.0266129	0.0284412	0.0228983	0.0265096	0.0328708	0.0207618	0.0212225	0.0180608	0.0174509	0.0217963	0.0246903	0.0196668	0.00269632	0.00258962	0.00244527	0.00244914	0.00242065	0.0027389	0.0153025	0.013904	0.0152626
XMW1208	1H-Tetrazole	Heterocyclic compound	CH2N4	288-94-8	0.0149022	0.0137803	0.0147969	0.0136208	0.0134561	0.0125223	0.016741	0.0184948	0.0158843	0.0176407	0.0211152	0.0241738	0.0155568	0.0137299	0.0132256	0.0137157	0.0109933	0.0135839	0.000896842	0.00621178	0.00600755	0.00407313	0.0066094	0.000911005	0.0135934	0.011909	0.0116021
XMW1406	2'-Ethoxyacetophenone	Ketone	C10H12O2	2142-67-8	0.0709673	0.0681219	0.0745227	0.0668231	0.0680454	0.0588835	0.221768	0.250386	0.207787	0.232945	0.297675	0.230856	0.284274	0.246386	0.358451	0.233005	0.297476	0.277269	0.0223657	0.0211822	0.0203276	0.0196326	0.0217223	0.0224744	0.137917	0.164148	0.149372
XMW0800	2(1H)-Pyridinone, 3-acetyl-4-hydroxy-6-methyl-	Heterocyclic compound	C8H9NO3	5501-39-3	0.00475428	0.00604444	0.00654159	0.00580921	0.00603532	0.00571093	0.0171849	0.0201114	0.0165441	0.0181776	0.0227582	0.0140921	0.025165	0.0226839	0.0223628	0.0205783	0.0246991	0.0199392	0.00940057	0.00833448	0.00850933	0.00835769	0.00848035	0.0097374	0.0113271	0.0121338	0.0111688
XMW1087	2(3H)-Furanone, 5-(acetyloxy)dihydro-5-methyl-	Heterocyclic compound	C7H10O4	57681-51-3	0.0133042	0.00818163	0.0121959	0.0124064	0.0091922	0.0121121	0.0104685	0.0127204	0.010383	0.0107746	0.0121806	0.00969555	0.0104146	0.0100124	0.00928897	0.00963613	0.0104971	0.00987459	0.0120614	0.00919899	0.00781822	0.00834928	0.00847742	0.0101268	0.0094253	0.0113053	0.0114885
XMW1261	2(3H)-Furanone, 5-acetyldihydro-	Heterocyclic compound	C6H8O3	29393-32-6	0.00495879	0.0214586	0.0221458	0.00388044	0.0218928	0.0041156	0.000822605	0.00095611	0.10451	0.000867912	0.00113732	0.000868504	0.0894364	0.0809642	0.0813184	0.0742378	0.114675	0.0798355	0.0128528	0.0124131	0.0118204	0.0122027	0.0121245	0.0146247	0.0498898	0.0470484	0.0459414
KMW0423	2(3H)-Furanone, 5-butyldihydro-	Ester	C8H14O2	104-50-7	0.189593	0.168034	0.1788	0.177446	0.180842	0.159508	0.215612	0.200798	0.196708	0.222535	0.273089	0.202271	0.274281	0.251851	0.229567	0.229637	0.262693	0.229141	0.168618	0.172186	0.156905	0.167798	0.165936	0.195363	0.187628	0.216208	0.220474
KMW0615	2(3H)-Furanone, 5-butyldihydro-4-methyl-, cis-	Heterocyclic compound	C9H16O2	55013-32-6	0.0219555	0.0186758	0.0215743	0.0187872	0.021358	0.0175282	0.0269466	0.0414173	0.0260788	0.0304219	0.0392681	0.0245799	0.0183183	0.0157881	0.0153297	0.0152835	0.0198451	0.0169161	0.00759213	0.00936742	0.00739745	0.0068553	0.00828666	0.0105554	0.0189772	0.0226625	0.0210596
KMW0317	2(3H)-Furanone, dihydro-5-propyl-	Ester	C7H12O2	105-21-5	0.612232	0.578708	0.571429	0.559485	0.573952	0.508836	0.393913	0.457297	0.388517	0.391027	0.474155	0.372411	0.470399	0.425212	0.366203	0.387503	0.389993	0.371519	0.55815	0.496462	0.449925	0.50322	0.519431	0.580112	0.50212	0.571651	0.512311
WMW0050	2(4H)-Benzofuranone, 5,6,7,7a-tetrahydro-4,4,7a-trimethyl-, (R)-	Heterocyclic compound	C11H16O2	17092-92-1	0.711266	0.630259	0.691651	0.631886	0.663535	0.608118	0.939902	0.905483	0.87967	0.790635	0.958935	0.732366	0.796229	0.668357	0.654175	0.520036	0.593109	0.565878	0.361759	0.363729	0.350212	0.321924	0.315682	0.361656	0.685742	0.795397	0.725541
KMW0539	2(5H)-Furanone, 5-ethyl-	Heterocyclic compound	C6H8O2	2407-43-4	1.80934	1.42241	1.38039	1.39688	1.42961	1.33023	1.0428	1.1071	0.986214	0.974448	1.24519	1.24841	1.25653	1.09283	1.05037	1.08325	1.05144	1.08817	1.01091	0.992752	0.846706	0.922293	1.00201	1.10616	1.33339	1.46641	1.32746
XMW0174	2,2'-Ethylidenebis(5-methylfuran)	Heterocyclic compound	C12H14O2	3209-79-8	0.226875	0.197955	0.230274	0.195603	0.208294	0.189684	0.679644	0.779618	0.642705	0.70336	0.881272	0.520186	1.02843	0.907014	0.875926	0.80831	0.977279	0.759744	0.164946	0.148656	0.135223	0.152211	0.150637	0.164876	0.338525	0.441933	0.392316
XMW0552	2,2'-Isopropylidenebis(5-methylfuran)	Heterocyclic compound	C13H16O2	59212-75-8	0.5163	0.493049	0.469578	1.50533	1.50521	0.46084	1.48199	4.08809	1.42446	1.41403	1.85917	3.00786	1.03952	0.872669	0.783436	3.52711	1.14592	1.00817	0.85959	0.784375	0.746574	0.778755	0.80768	0.899726	0.665047	0.87491	0.76847
XMW0390	2,2,4-Trimethyl-1,3-pentanediol diisobutyrate	Ester	C16H30O4	6846-50-0	0.270944	0.198391	0.243819	0.213108	0.218287	0.220426	0.482598	0.583302	0.51814	0.475048	0.611854	0.369373	0.325209	0.302828	0.294016	0.291363	0.406578	0.29264	0.154287	0.16553	0.129956	0.128827	0.120041	0.200289	0.200233	0.217182	0.22683
XMW0599	2,2,6-Trimethyl-4H-1,3-dioxin-4-one	Heterocyclic compound	C7H10O3	5394-63-8	0.127284	0.134188	0.144633	0.17197	0.139809	0.137559	0.428826	0.45166	0.434161	0.435168	0.544073	0.380445	0.402519	0.369071	0.343399	0.353257	0.418612	0.330335	0.139083	0.114181	0.107809	0.118992	0.0962199	0.136316	0.221332	0.279434	0.277222
GMW0309	2,3,5,9-tetramethyltricyclo[6.3.0.01,5]undec-3-ene	Terpenoids	C15H24	138752-23-5	2.73544	2.53188	2.89893	2.94572	2.73007	2.56722	6.8574	10.0065	6.43368	7.85446	9.99596	6.72479	4.53827	4.05439	3.80592	3.66533	4.74439	3.99884	1.53493	1.48052	1.05104	0.965947	1.35941	1.69049	2.60969	3.26089	2.72331
KMW0181	2,3-Dehydro-1,8-cineole	Terpenoids	C10H16O	92760-25-3	1.51598	1.55698	1.72582	1.63636	1.60062	1.49278	6.87777	7.20434	6.214	7.16174	8.18169	6.4793	7.70127	6.92239	6.44435	6.30091	7.20395	6.37392	0.903927	0.847806	0.884186	0.904769	0.971867	0.868203	3.16087	3.26738	3.34609
KMW0269*022	2,3-Dimethyl-5-ethylpyrazine	Heterocyclic compound	C8H12N2	15707-34-3	1.62516	1.56002	1.57435	1.54217	1.56477	1.46056	14.0151	15.5538	13.1517	14.2149	17.4691	13.3036	10.318	15.5812	17.1097	17.0545	20.8475	16.885	1.82469	1.75249	1.6548	1.65741	1.63814	1.85351	8.44561	9.60295	9.29166
XMW1389	2,3-Dimethylanisole	Ether	C9H12O	2944-49-2	0.315343	0.326834	0.352185	0.261242	0.341715	0.266038	0.534937	0.684649	0.534185	0.537188	0.816484	0.587855	0.45856	0.517739	0.403178	0.408934	0.501493	0.382859	0.309364	0.259046	0.248149	0.264916	0.223588	0.304861	0.256556	0.337589	0.342841
XMW0049	2,4,4-Trimethyl-3-(3-methylbutyl)cyclohex-2-enone	Ketone	C14H24O	88725-82-0	0.0456976	0.0438658	0.0442689	0.0433639	0.0439994	0.0410692	0.421262	0.469173	0.411012	0.384302	0.574691	0.439942	0.554044	0.482265	0.466488	0.411426	0.488574	0.434215	0.051308	0.0492777	0.0465308	0.0466044	0.0460623	0.0521183	0.280742	0.260892	0.24244
NMW0228	2,4,6-Cycloheptatrien-1-one, 2-hydroxy-4-(1-methylethyl)-	Terpenoids	C10H12O2	499-44-5	0.0456717	0.0299462	0.0420849	0.0280156	0.0434043	0.0253871	0.059704	0.0666768	0.0560683	0.0595686	0.0769272	0.0596674	0.124041	0.0895819	0.089575	0.0591164	0.0737695	0.0590352	0.0269383	0.0272291	0.0261572	0.0246616	0.0234408	0.0271811	0.0742501	0.0659484	0.0608037
XMW0084*030	2,4,6-Octatriene, 2,6-dimethyl-	Terpenoids	C10H16	673-84-7	0.422639	0.441302	0.468807	0.363365	0.4599	0.419812	0.896544	1.04088	0.885196	0.893719	1.16235	0.816006	0.566666	0.511031	0.483589	0.488355	0.573711	0.461793	0.394776	0.331071	0.312482	0.333082	0.29445	0.399807	0.423446	0.637506	0.57172
XMW0453*030	2,4,6-Octatriene, 2,6-dimethyl-, (E,Z)-	Terpenoids	C10H16	7216-56-0	0.422639	0.441302	0.468807	0.363365	0.4599	0.419812	0.896544	1.04088	0.885196	0.893719	1.16235	0.816006	0.566666	0.511031	0.483589	0.488355	0.573711	0.461793	0.394776	0.331071	0.312482	0.333082	0.29445	0.399807	0.423446	0.637506	0.57172
NMW0007*140	2,4-Cycloheptadien-1-one, 2,6,6-trimethyl-	Terpenoids	C10H14O	503-93-5	1.24568	1.1827	1.11955	1.11354	1.14503	1.04159	0.14837	0.17245	0.146316	0.156542	0.205134	0.156648	0.187309	0.165991	0.162491	0.162457	0.195199	0.163307	1.17084	1.14493	1.04085	1.09742	1.04537	1.22183	0.732121	0.80977	0.782602
w02	2,4-Decadien-1-ol	Alcohol	C10H18O	14507-02-9	0.357644	0.461013	0.416583	0.385888	0.376392	0.329928	0.423016	0.502607	0.321418	0.489914	0.664765	0.470102	0.63428	0.565757	0.512673	0.528355	0.634407	0.53069	0.239409	0.196614	0.211059	0.210792	0.244627	0.22345	0.327952	0.332451	0.345777
XMW0691*049	2,4-Decadienal	Hydrocarbons	C10H16O	2363-88-4	0.740445	0.710254	0.78438	0.689362	0.712258	0.623634	3.5414	4.00808	3.39067	3.57641	4.54391	3.54875	4.34747	3.82074	3.74443	3.708	2.81021	3.67148	0.262408	0.29551	0.282731	0.236902	0.257859	0.266577	1.35184	1.8187	1.6457
KMW0482*049	2,4-Decadienal, (E,E)-	Aldehyde	C10H16O	25152-84-5	0.740445	0.710254	0.78438	0.689362	0.712258	0.623634	3.5414	4.00808	3.39067	3.57641	4.54391	3.54875	4.34747	3.82074	3.74443	3.708	2.81021	3.67148	0.262408	0.29551	0.282731	0.236902	0.257859	0.266577	1.35184	1.8187	1.6457
KMW0580	2,4-Decadienoic acid, ethyl ester, (E,Z)-	Ester	C12H20O2	3025-30-7	0.439036	0.519198	0.410472	0.509913	0.520892	0.487395	0.323431	0.392589	0.314386	0.33529	0.417111	0.309828	0.394318	0.35389	0.315286	0.322875	0.326381	0.307655	0.620814	0.615273	0.526522	0.573193	0.542351	0.651249	0.343647	0.42317	0.408458
WMW0078	2,4-Di-tert-butylphenol	Phenol	C14H22O	96-76-4	0.241447	0.207207	0.241072	0.192237	0.235026	0.206191	0.0342821	0.039846	0.0338077	0.0361703	0.0473979	0.036195	0.0432794	0.0383538	0.037545	0.037537	0.0451024	0.0377334	0.195561	0.196496	0.173528	0.182442	0.179762	0.262834	0.346062	0.308575	0.286964
XMW0108	2,4-Dimethyldodecane	Hydrocarbons	C14H30	6117-99-3	0.131749	0.138578	0.140983	0.125145	0.127128	0.112439	0.803848	0.263461	0.767412	0.811994	0.293258	0.019444	0.233135	0.202096	0.194381	0.020165	0.0242291	0.0202705	0.107872	0.0987227	0.0967352	0.0984562	0.100625	0.109913	0.179657	0.206597	0.194082
D373	2,4-Heptadien-1-ol, (E,E)-	Alcohol	C7H12O	33467-79-7	4.79529	4.60384	5.02599	4.70454	4.56228	4.16289	10.1191	10.8443	9.42881	10.479	11.767	10.1503	11.8303	10.5885	10.064	9.89823	10.8062	9.98869	2.15186	2.16872	2.06447	2.03855	2.2449	2.29515	4.87853	6.84509	5.00638
XMW0761	2,4-Quinolinediol	Heterocyclic compound	C9H7NO2	86-95-3	76.9673	70.4029	75.8699	69.9555	72.3497	66.0333	152.916	74.7616	145.527	159.384	201.817	138.126	166.692	148.065	141.707	137.671	163.974	128.533	14.3604	13.7922	13.0234	13.044	12.8922	14.5872	93.9374	109.919	99.0277
XMW1131	2,5-Furandione, 3-methyl-4-propyl-	Heterocyclic compound	C8H10O3	16493-20-2	0.156919	0.14255	0.16261	0.142131	0.154773	0.124466	0.38225	0.599779	0.365959	0.436986	0.550216	0.353708	0.26782	0.236964	0.222691	0.214514	0.280942	0.237043	0.0765636	0.0752695	0.0530739	0.0471264	0.0670267	0.0987228	0.152748	0.189797	0.159746
XMW1203	2,5-Furandione, dihydro-3-methyl-	Heterocyclic compound	C5H6O3	4100-80-5	0.241429	0.234381	0.257255	0.239482	0.23922	0.216235	0.933946	1.02717	0.900333	0.961722	1.14785	0.902002	0.950533	0.848815	0.810243	0.777961	0.911081	0.783556	0.209956	0.194399	0.189114	0.194474	0.200831	0.206686	0.481535	0.558432	0.539159
XMW0497	2,5-ThiophenedicarboxAldehyde	Heterocyclic compound	C6H4O2S	932-95-6	0.446864	0.403944	0.428471	0.292052	0.44057	0.332692	0.890812	1.25201	0.909649	0.883904	1.41447	0.909718	0.587449	0.525761	0.547279	0.534537	0.669637	0.502505	0.357858	0.312852	0.266919	0.287426	0.238891	0.389146	0.27599	0.395726	0.35843
XMW0203	2,5-di-tert-Butyl-1,4-benzoquinone	Aromatics	C14H20O2	2460-77-7	0.0237238	0.017459	0.0175657	0.0157374	0.0178408	0.0181261	0.0683918	0.0751854	0.0733295	0.0663879	0.0814965	0.0433957	0.0355538	0.0305927	0.0302579	0.0310435	0.0438926	0.0329283	0.0154092	0.0166311	0.0132734	0.0130573	0.0121206	0.0199189	0.0202661	0.0234615	0.0241407
NMW0310	2,6,10-Dodecatrien-1-ol, 3,7,11-trimethyl-	Terpenoids	C15H26O	4602-84-0	0.145093	0.124373	0.1495	0.136187	0.139153	0.129785	0.199702	0.262995	0.196279	0.208529	0.287209	0.225001	0.153941	0.141014	0.141193	0.128862	0.173339	0.129115	0.0734565	0.0725526	0.0562006	0.0625993	0.011127	0.0850561	0.101541	0.127306	0.136294
NMW0302	2,6,10-Dodecatrien-1-ol, 3,7,11-trimethyl-, (Z,E)-	Terpenoids	C15H26O	3790-71-4	0.0302086	0.0255989	0.0302476	0.0272394	0.0286483	0.0260901	0.0339463	0.0441169	0.0335825	0.035792	0.0462981	0.0369212	0.0320479	0.0303958	0.0298729	0.0274093	0.0360419	0.0269574	0.0153367	0.0150348	0.0121119	0.0133339	0.0119643	0.0184175	0.0221193	0.026539	0.0281129
NMW0319	2,6,10-Dodecatrienal, 3,7,11-trimethyl-, (E,E)-	Terpenoids	C15H24O	502-67-0	0.0456342	0.0336593	0.0326748	0.028172	0.0327981	0.0301959	0.0502668	0.0601437	0.0511276	0.0510384	0.0627587	0.0289314	0.0611681	0.0557453	0.0546107	0.0533663	0.075443	0.0542453	0.0551559	0.0416731	0.0468694	0.0395209	0.0476654	0.0559493	0.0340181	0.0478112	0.0378467
XMW0159	2,6,10-Trimethyltridecane	Hydrocarbons	C16H34	3891-99-4	0.532878	0.42774	0.428617	0.447141	0.464827	0.426312	0.76738	0.943548	0.726935	0.825111	1.02783	0.62253	1.08156	0.970292	0.796404	0.850997	1.00629	0.817676	0.361309	0.320584	0.322237	0.307916	0.343499	0.360018	0.54577	0.595475	0.564183
KMW0681	2,6,11-Dodecatrienal, 2,6-dimethyl-10-methylene-	Terpenoids	C15H22O	60066-88-8	0.116441	0.101574	0.116045	0.104763	0.110553	0.100373	0.137627	0.177545	0.134899	0.145585	0.195359	0.156909	0.120092	0.105935	0.105886	0.098299	0.130698	0.0965232	0.0577703	0.0572938	0.047473	0.050392	0.0468886	0.0683688	0.0885493	0.0889103	0.0915045
NMW0308	2,6,9,11-Dodecatetraenal, 2,6,10-trimethyl-	Terpenoids	C15H22O	4955-32-2	0.0111013	0.0106563	0.0107542	0.0105344	0.0106887	0.00997691	0.0111658	0.0129779	0.0110113	0.0117808	0.0154376	0.0117888	0.206649	0.18737	0.180667	0.163744	0.202935	0.156426	0.0124642	0.011971	0.0113037	0.0113216	0.0111899	0.0126611	0.0515839	0.0569644	0.0588959
XMW1396	2,6-DimethoxyamphetAmine	Amine	C11H17NO2	23690-14-4	0.245458	0.0335459	0.23724	0.0331621	0.0336481	0.0314073	0.326098	0.386662	0.316518	0.343702	0.42411	0.315333	0.280055	0.232931	0.228689	0.192436	0.233563	0.207594	0.0392373	0.0376847	0.035584	0.0356403	0.0352257	0.0398569	0.193499	0.211416	0.195369
XMW0780	2,6-Dimethyl-1,3,5,7-octatetraene, E,E-	Hydrocarbons	C10H14	460-01-5	1.82697	1.65638	1.72298	1.41863	1.65273	1.45049	7.28075	6.87518	8.25955	6.94502	7.8963	4.05583	7.89802	7.03472	7.30557	6.67564	9.39745	6.80711	0.817207	0.756727	0.745778	0.739737	0.741939	0.850073	2.81344	3.10653	2.74811
XMW0902	2,6-Dimethyl-2-trans-6-octadiene	Terpenoids	C10H18	2609-23-6	4.90705	5.09085	6.65934	5.43037	5.31651	4.91529	24.5177	25.748	22.0712	25.5823	29.5877	23.2818	27.1359	24.5403	23.0119	22.5856	25.7564	22.5236	3.44213	3.04045	3.17836	3.26393	3.47981	3.16481	11.4796	11.7804	12.0759
XMW0282	2,6-Dimethyldecane	Hydrocarbons	C12H26	13150-81-7	0.704153	0.637551	0.67627	0.607465	0.676689	0.604651	1.40233	1.53878	1.33039	1.34512	1.77744	0.869981	0.119875	0.106232	0.103992	0.10397	0.124925	0.104514	0.560623	0.509012	0.500867	0.509467	0.529058	0.563928	0.854921	0.745083	0.805855
XMW0744	2,6-Dodecadien-1-al	Aldehyde	C12H20O	21662-13-5	0.0570386	0.0490365	0.054566	0.0521976	0.0513638	0.0478983	0.11984	0.134089	0.0696946	0.100595	0.154633	0.077553	0.0815277	0.0727268	0.0709216	0.0663725	0.0817179	0.0723482	0.035348	0.0329063	0.0313826	0.0318125	0.0311868	0.0370426	0.0451301	0.0833334	0.0743422
XMW1433	2,6-Heptanedione, 3-acetyl-	Ketone	C9H14O3	29214-57-1	0.000190125	0.000182504	0.000184181	0.000180416	0.000183059	0.000170868	0.0115726	0.0153534	0.0114649	0.0118732	0.0155172	0.00912571	0.0125919	0.0099904	0.0100718	0.00957796	0.00390635	0.00909566	0.00106733	0.00020502	0.00100724	0.00124001	0.000191642	0.000216838	0.00783388	0.00794123	0.0077345
KMW0354	2,6-Nonadien-1-ol	Alcohol	C9H16O	7786-44-9	0.0123625	0.0108306	0.0152483	0.0132531	0.0106922	0.0120198	0.0431117	0.0431198	0.0318748	0.031482	0.0534036	0.0347433	0.0409977	0.0356191	0.0341482	0.0349511	0.042669	0.0346776	0.0131995	0.0123658	0.0108068	0.011858	0.0106225	0.0141126	0.0201418	0.0149123	0.0222324
WMW0094*032	2,6-Nonadienal, (E,E)-	Aldehyde	C9H14O	17587-33-6	0.132993	0.0826618	0.0817169	0.0658266	0.0868534	0.0814906	0.179468	0.195239	0.21777	0.163745	0.124947	0.0969123	0.157134	0.1332	0.135241	0.142387	0.176494	0.125926	0.0762707	0.0784815	0.0595683	0.063414	0.0576993	0.104939	0.0808237	0.0802815	0.0749174
KMW0345*032	2,6-Nonadienal, (E,Z)-	Aldehyde	C9H14O	557-48-2	0.132993	0.0826618	0.0817169	0.0658266	0.0868534	0.0814906	0.179468	0.195239	0.21777	0.163745	0.124947	0.0969123	0.157134	0.1332	0.135241	0.142387	0.176494	0.125926	0.0762707	0.0784815	0.0595683	0.063414	0.0576993	0.104939	0.0808237	0.0802815	0.0749174
KMW0439	2,6-Octadien-1-ol, 3,7-dimethyl-, (Z)-	Terpenoids	C10H18O	106-25-2	0.34472	0.323198	0.310128	0.30674	0.312837	0.28548	0.228838	0.260695	0.219381	0.229956	0.29435	0.222469	0.230939	0.197569	0.188328	0.239799	0.188735	0.183254	0.32175	0.313604	0.286352	0.30193	0.286255	0.336761	0.193421	0.211664	0.288018
KMW0518	2,6-Octadien-1-ol, 3,7-dimethyl-, acetate, (Z)-	Ester	C12H20O2	141-12-8	0.346419	0.330708	0.373461	0.317158	0.346411	0.301398	1.09023	1.25909	1.03804	1.08638	1.47331	1.07577	1.13513	1.02526	0.978664	0.981584	1.1359	0.95292	0.125565	0.113968	0.107469	0.106657	0.106718	0.130801	0.508092	0.626615	0.615264
w09	2,6-Octadiene, 2,6-dimethyl-	Hydrocarbons	C10H18	2792-39-4	10.3165	10.3906	11.2588	10.4368	10.6063	9.76939	31.6937	32.947	28.0904	33.0868	37.8747	31.1311	36.4917	33.3258	31.8486	30.9359	36.0588	30.8751	6.3086	6.03072	5.73179	6.40085	5.87381	6.07854	17.1315	18.2268	19.5087
XMW0693*050	2,6-Octadienoic acid, 3,7-dimethyl-, methyl ester	Ester	C11H18O2	2349-14-6	0.900006	0.847086	0.93689	0.870038	0.860925	0.803606	4.34502	4.90962	4.16542	4.35844	5.5381	4.32971	5.32637	4.65983	4.57217	4.52954	3.57109	4.50343	0.387813	0.356404	0.341322	0.296056	0.372872	0.340998	1.55467	2.53895	2.35979
XMW1326	2,6-Piperidinedione, 3-ethyl-	Heterocyclic compound	C7H11NO2	25115-69-9	0.00417129	0.00810896	0.0101304	0.000791655	0.00895249	0.00688788	0.0140817	0.0205654	0.0148604	0.0153585	0.0224936	0.0154027	0.0120247	0.00996391	0.0105067	0.0102628	0.0117128	0.0101446	0.00941046	0.00947343	0.00799825	0.00908744	0.00800638	0.0111916	0.00952247	0.0131909	0.012394
NMW0173	2,6-dihydroxy-Benzoic Acid	Acid	C7H6O4	303-07-1	0.149311	0.131372	0.150058	0.12799	0.136734	0.124837	0.415583	0.482547	0.38725	0.430459	0.540508	0.316191	0.629825	0.55483	0.532882	0.497927	0.597188	0.465379	0.146518	0.136528	0.128225	0.13052	0.128892	0.162859	0.265813	0.288504	0.255367
XMW0068	2,7-Nonadien-5-one, 4,6-dimethyl-	Ketone	C11H18O	74630-80-1	0.0950686	0.098563	0.107152	0.0804221	0.103253	0.0679358	0.166207	0.219671	0.171758	0.168331	0.269851	0.191885	0.182827	0.16663	0.158801	0.162116	0.181619	0.138056	0.0884185	0.0773524	0.0766593	0.0789199	0.0687922	0.0885442	0.0831029	0.111226	0.110756
D406	2,7-Octadien-4-ol, 2-methyl-6-methylene-, (S)-	Terpenoids	C10H16O	35628-00-3	0.210066	0.21408	0.228397	0.187843	0.21442	0.189684	0.603852	0.744866	0.602627	0.670339	0.791142	0.480823	1.01762	0.925941	0.784761	0.832679	0.982845	0.798317	0.149266	0.13228	0.130673	0.132786	0.129222	0.152665	0.371214	0.386192	0.363384
NMW0152*052	2,7-Octadiene-1,6-diol, 2,6-dimethyl-	Terpenoids	C10H18O2	64142-78-5	0.00662079	0.0127683	0.00105958	0.00103792	0.0068243	0.0062363	0.0220153	0.0262769	0.0219077	0.0236219	0.0298274	0.0222886	0.0235998	0.0214802	0.0211419	0.0197742	0.0253936	0.0208498	0.00614029	0.00724667	0.00568394	0.00664913	0.00622467	0.00796045	0.00630516	0.00836531	0.00839422
NMW0141	2,7-Octadiene-1,6-diol, 2,6-dimethyl-, (E)-	Terpenoids	C10H18O2	75991-61-6	0.119748	0.0923502	0.105925	0.099283	0.107033	0.0901636	0.164647	0.241978	0.162052	0.184863	0.236665	0.147953	0.126063	0.108547	0.107011	0.101891	0.133382	0.109485	0.0456069	0.074838	0.0415516	0.0361716	0.0653139	0.0926487	0.0781185	0.0961112	0.081239
w18*052	2,7-Octadiene-1,6-diol, 2,6-dimethyl-, (Z)-	Alcohol	C10H18O2	103619-06-3	0.00662079	0.0127683	0.00105958	0.00103792	0.0068243	0.0062363	0.0220153	0.0262769	0.0219077	0.0236219	0.0298274	0.0222886	0.0235998	0.0214802	0.0211419	0.0197742	0.0253936	0.0208498	0.00614029	0.00724667	0.00568394	0.00664913	0.00622467	0.00796045	0.00630516	0.00836531	0.00839422
XMW0907	2-(2-Acetoxy-1-propyl)furan, (S)	Heterocyclic compound	C9H12O3	60830-70-8	0.142603	0.131168	0.152275	0.130635	0.140906	0.106582	0.562336	0.603174	0.557353	0.56832	0.582433	0.349193	0.7607	0.699152	0.585739	0.617701	0.771496	0.600268	0.065168	0.0589158	0.0586824	0.0558394	0.0640385	0.0711318	0.346277	0.346187	0.326297
XMW0702	2-(3-Thienyl)pyridine	Heterocyclic compound	C9H7NS	21298-55-5	0.0161203	0.0138866	0.0141369	0.0138143	0.0129808	0.00921817	0.0296636	0.0306476	0.0283433	0.0302297	0.0351893	0.0195713	0.0295384	0.0263072	0.0191845	0.0226476	0.0206013	0.0226108	0.0066696	0.00568058	0.00617564	0.00563397	0.00655742	0.00548831	0.014288	0.0180845	0.015043
XMW0555	2-Acetylbenzofuran	Heterocyclic compound	C10H8O2	1646-26-0	0.28132	0.242786	0.28108	0.239727	0.258421	0.233982	0.824996	0.945082	0.775755	0.854293	1.07282	0.635727	1.24297	1.10442	1.06914	0.990554	1.19979	0.933439	0.23364	0.197682	0.202481	0.209062	0.206885	0.223223	0.402476	0.540867	0.48639
KMW0211	2-Acetylthiazole	Heterocyclic compound	C5H5NOS	24295-03-2	0.0723802	0.0709251	0.080235	0.0658174	0.0720872	0.0653879	0.474927	0.502678	0.478274	0.465083	0.563459	0.268264	0.376866	0.346713	0.30709	0.317824	0.39411	0.293943	0.0606644	0.0583109	0.0613067	0.0609269	0.0626215	0.0613846	0.15826	0.117831	0.139016
XMW0150	2-Amino-6-t-butyl-3-cyano-4,5,6,7-tetrahydrothianaphthene	Heterocyclic compound	C13H18N2S	42159-76-2	0.00763441	0.00763462	0.0197348	0.00839971	0.00770397	0.00804853	0.0034291	0.00883749	0.00572301	0.00430739	0.00570882	0.00567816	0.0064513	0.00793503	0.00801612	0.00673714	0.00912315	0.00597634	0.004651	0.00850964	0.00344267	0.00928178	0.00537437	0.00867752	0.00578712	0.00600324	0.00783178
D119	2-Benzylidene-1-heptanol	Alcohol	C14H20O	101-85-9	0.128254	0.0944785	0.102511	0.0878148	0.108912	0.102484	0.312815	0.385982	0.290394	0.363408	0.512768	0.664214	0.5224	0.540867	0.525295	0.473183	0.49762	0.514872	0.0702195	0.0742466	0.0579987	0.0607076	0.0589067	0.0932771	0.27339	0.378808	0.386268
w39	2-Butanone, 4-(2,6,6-trimethyl-2-cyclohexen-1-yl)-	Ketone	C13H22O	31499-72-6	0.0125596	0.0120561	0.0121669	0.0119182	0.0120929	0.0564377	0.154596	0.236688	0.144947	0.218604	0.27835	0.180439	0.201904	0.181572	0.176301	0.162809	0.191206	0.152889	0.0141016	0.0135436	0.0127886	0.0128088	0.0126599	0.0143243	0.0890288	0.105914	0.107097
KMW0601	2-Butanone, 4-(4-hydroxyphenyl)-	Ketone	C10H12O2	5471-51-2	0.00148827	0.00833555	0.00144174	0.00764312	0.00716481	0.0069961	0.00149692	0.00173986	0.0014762	0.00157936	0.00206961	0.00158044	0.00188978	0.0016747	0.00163939	0.00163904	0.00196938	0.00164762	0.0104415	0.0108051	0.0106628	0.0096478	0.00777723	0.00898868	0.00641213	0.011126	0.00980294
D290	2-Butanone, 4-phenyl-	Ketone	C10H12O	2550-26-7	0.0175244	0.0167182	0.0175138	0.0159588	0.017814	0.0147378	0.0637726	0.072793	0.0619258	0.0651985	0.0856467	0.0626422	0.0870376	0.0789283	0.0816254	0.0787014	0.091781	0.0736184	0.0109884	0.00945812	0.00931857	0.00943683	0.00971756	0.0103422	0.0360623	0.0402147	0.0391486
KMW0526	2-Buten-1-one, 1-(2,6,6-trimethyl-1,3-cyclohexadien-1-yl)-, (E)-	Terpenoids	C13H18O	23726-93-4	2.28493	1.976	2.29802	1.89169	2.07114	1.83979	7.00948	7.62885	6.54733	6.95599	8.79812	5.50567	10.3374	9.14239	8.78446	8.2944	9.93317	7.91403	2.14452	1.94423	1.81562	1.91642	1.93789	2.21867	4.1306	4.49355	4.05498
D283	2-Buten-1-one, 1-(2,6,6-trimethyl-2-cyclohexen-1-yl)-, (E)-	Ketone	C13H20O	24720-09-0	0.0768136	0.0680954	0.0753707	0.062623	0.0669069	0.0613278	0.221711	0.345736	0.209937	0.224142	0.294722	0.265371	0.5381	0.477496	0.456046	0.42552	0.511746	0.395426	0.0751818	0.0697241	0.0641402	0.0442108	0.043153	0.0769968	0.168225	0.179113	0.194634
D352	2-Butenal, 2-methyl-4-(2,6,6-trimethyl-1-cyclohexen-1-yl)-	Aldehyde	C14H22O	3155-71-3	0.439913	0.438389	0.344066	0.0995848	0.3384	0.315258	1.07694	1.38844	1.21845	1.09195	1.40609	0.851609	0.791215	0.706381	0.709811	0.698871	0.974608	0.705584	0.331502	0.342518	0.274717	0.280446	0.25296	0.433663	0.395011	0.375409	0.479289
NMW0782	2-Butenoic acid, 2-methyl-, ethyl ester	Ester	C7H12O2	55514-48-2	0.428654	0.428814	0.485225	0.446207	0.454186	0.432637	1.5167	1.58774	1.42843	1.59518	1.82303	1.46902	1.89775	1.54036	1.69275	1.62963	1.8534	1.64724	0.159434	0.148562	0.154196	0.121705	0.164527	0.149414	0.820479	0.889234	0.916694
XMW1084	2-Butenoic acid, 3-hexenyl ester, (E,Z)-	Ester	C10H16O2	65405-80-3	0.095956	0.104732	0.103956	0.096309	0.103029	0.093291	0.18981	0.178158	0.198105	0.198723	0.245215	0.17723	0.0151596	0.0134343	0.151706	0.0131482	0.177046	0.143767	0.0674285	0.0643701	0.0649378	0.0681163	0.0672943	0.0717411	0.107943	0.110734	0.129424
XMW1246	2-Butenoic acid, hexyl ester	Ester	C10H18O2	19089-92-0	1.33709	0.817849	0.852487	0.710557	0.941653	1.01586	4.66544	4.60527	5.57119	5.24044	4.26097	2.4581	3.50359	3.30208	3.22351	3.00895	3.50576	3.17734	0.60471	0.533435	0.464055	0.0929578	0.556792	0.743071	2.13589	2.16059	1.7908
KMW0310	2-Cyclohexen-1-ol, 1-methyl-4-(1-methylethenyl)-, trans-	Alcohol	C10H16O	7212-40-0	0.0569771	0.0453299	0.0477762	0.0423972	0.0467219	0.042711	0.0910987	0.118888	0.0872591	0.0922691	0.113745	0.0803484	0.0539997	0.0474037	0.0487723	0.0484856	0.0645811	0.0454129	0.0331517	0.0334016	0.0308316	0.0333442	0.0290272	0.0455127	0.0516574	0.0639704	0.056783
XMW0527	2-Cyclohexen-1-ol, 1-methyl-4-(1-methylethyl)-, cis-	Alcohol	C10H18O	29803-82-5	0.673148	0.696413	0.753015	0.564513	0.714874	0.556115	1.06468	1.37045	0.996183	1.06683	1.62105	1.30931	0.751899	0.662703	0.671059	0.666429	0.891902	0.623843	0.506709	0.437069	0.411472	0.437146	0.395926	0.523364	0.712157	0.871093	0.752381
XMW1126	2-Cyclohexen-1-ol, 1-methyl-4-(1-methylethyl)-, trans-	Terpenoids	C10H18O	29803-81-4	0.566628	0.562229	0.599061	0.473767	0.573524	0.496041	2.10848	2.37843	2.14388	2.0797	2.65297	1.69974	1.80932	2.04595	1.83646	1.9037	1.69881	1.40395	0.378491	0.271001	0.258472	0.284439	0.235407	0.391642	1.06091	1.14543	1.09828
KMW0547	2-Cyclohexen-1-ol, 2-methyl-5-(1-methylethenyl)-, acetate	Ester	C12H18O2	97-42-7	0.0635562	0.0589533	0.0692038	0.0396518	0.0654557	0.0352722	0.121766	0.170141	0.107345	0.139651	0.182571	0.134736	0.089775	0.0809439	0.0775808	0.0741302	0.0787627	0.0647055	0.0294667	0.0294967	0.0226708	0.022682	0.0282801	0.0367736	0.0752699	0.0859571	0.0751059
XMW0951	2-Cyclohexen-1-ol, 2-methyl-5-(1-methylethenyl)-, acetate, (1R-cis)-	Ester	C12H18O2	7111-29-7	0.023602	0.0239672	0.0302167	0.026547	0.0270664	0.0237333	0.049521	0.0666099	0.0508632	0.0519852	0.0664972	0.0439253	0.0152799	0.0132615	0.0654424	0.0685254	0.0161292	0.0646709	0.0173059	0.0169225	0.0152808	0.0154104	0.0167385	0.0202211	0.0348677	0.0428774	0.0365981
XMW0956	2-Cyclohexen-1-ol, 2-methyl-5-(1-methylethenyl)-, acetate, cis-	Ester	C12H18O2	1205-42-1	0.0823609	0.0704172	0.0759516	0.0692913	0.0693156	0.0609236	0.0966084	0.149125	0.0882515	0.0957041	0.109698	0.0940373	0.114228	0.100033	0.095314	0.0895323	0.103925	0.0828017	0.0332863	0.0289586	0.0292073	0.0296611	0.0318358	0.0323422	0.0724395	0.0733156	0.0771669
KMW0420	2-Cyclohexen-1-ol, 3-methyl-6-(1-methylethyl)-, trans-	Terpenoids	C10H18O	16721-39-4	0.759019	0.683464	0.705596	0.491113	0.744787	0.55231	1.30087	1.95587	1.73625	1.30395	2.07212	1.35754	0.854395	0.804701	0.829235	0.802067	1.05625	0.743371	0.590877	0.533002	0.469839	0.490075	0.405642	0.634942	0.715182	0.966606	0.854439
KMW0135	2-Cyclohexen-1-one	Ketone	C6H8O	930-68-7	0.0122318	0.0118233	0.0136966	0.0121298	0.0128202	0.0120344	0.0478013	0.0482582	0.045432	0.0511108	0.0549254	0.0459585	0.0615482	0.0587625	0.0532419	0.0526105	0.0585439	0.0536643	0.00422913	0.00427253	0.00419312	0.00303298	0.00458545	0.00347334	0.0233783	0.0318557	0.0327164
XMW0713	2-Cyclohexen-1-one, 3-methyl-	Ketone	C7H10O	1193-18-6	2.59036	2.44209	1.96326	1.96385	2.43617	2.20939	0.302661	0.351781	0.298472	0.319331	0.418454	0.319548	0.382093	0.338607	0.331467	0.331397	0.398188	0.333131	2.05935	1.92949	1.84456	1.89572	1.93302	2.11093	1.55659	1.97786	1.59644
XMW0248	2-Cyclohexen-1-one, 3-methyl-6-(1-methylethenyl)-, (S)-	Terpenoids	C10H14O	16750-82-6	0.0203836	0.0167819	0.0184084	0.0161827	0.0179679	0.0187458	0.0714811	0.0685762	0.0771056	0.0677503	0.0814623	0.0461021	0.0985386	0.0881799	0.0769455	0.0814441	0.0987886	0.0742489	0.00806204	0.00796385	0.0074573	0.00798035	0.00736482	0.00829309	0.0333653	0.0306723	0.035318
KMW0428*107	2-Cyclohexen-1-one, 3-methyl-6-(1-methylethyl)-	Terpenoids	C10H16O	89-81-6	0.398649	0.470159	0.504832	0.468147	0.453039	0.403009	1.12798	0.447898	0.316975	1.18014	1.52168	0.40159	1.1901	1.07346	0.936838	0.95592	1.17026	0.929421	0.210208	0.179911	0.195106	0.190449	0.216233	0.202358	0.605514	0.652407	0.674724
KMW0737	2-Cyclohexen-1-one, 4-(3-hydroxy-1-butenyl)-3,5,5-trimethyl-	Ketone	C13H20O2	34318-21-3	0.129111	0.108674	0.112759	0.113186	0.110327	0.0999021	0.152071	0.17883	0.141352	0.156268	0.198999	0.122301	0.144505	0.130608	0.115154	0.117579	0.150468	0.11763	0.092587	0.0855317	0.0799527	0.0849565	0.0803	0.103497	0.126871	0.120824	0.109778
w37	2-Cyclohexene-1-carboxaldehyde, 2,6,6-trimethyl-	Aldehyde	C10H16O	432-24-6	0.0535279	0.0385579	0.039687	0.0305876	0.042261	0.0379834	0.0604497	0.0670816	0.0788263	0.0531359	0.0790138	0.0461784	0.0394943	0.00485974	0.0306264	0.0388204	0.0427092	0.0268856	0.0311119	0.0321019	0.0260834	0.0282344	0.0217661	0.0399848	0.0362629	0.04002	0.0366138
KMW0260	2-Cyclopenten-1-one, 2-hydroxy-3,4-dimethyl-	Ketone	C7H10O2	21835-00-7	0.307369	0.297594	0.308068	0.295323	0.30141	0.264325	0.0440352	0.0511819	0.0434258	0.0464605	0.0608823	0.0464922	0.0555921	0.0492652	0.0482263	0.0482161	0.0579338	0.0484683	0.317604	0.300865	0.285533	0.293522	0.292566	0.329994	0.24697	0.261942	0.232271
D294	2-Cyclopenten-1-one, 2-pentyl-	Ketone	C10H16O	25564-22-1	6.3017	6.18728	6.46882	5.9851	6.09779	5.49393	21.7562	24.9569	21.1932	21.571	27.4206	21.1404	21.3717	18.8859	18.2367	18.1429	20.9703	17.6674	5.43518	4.75479	4.57637	4.94827	5.00632	5.49136	11.1304	13.33	12.2694
XMW0462	2-Cyclopenten-1-one, 3-methyl-2-(2-pentenyl)-, (Z)-	Ketone	C11H16O	488-10-8	0.012062	0.00943219	0.0109665	0.00913015	0.00944024	0.00823204	0.0233894	0.0268626	0.0216339	0.0233018	0.0297789	0.0186703	0.037326	0.031526	0.0309105	0.0277421	0.0340134	0.026915	5.52012	5.09394	5.16759	5.15252	5.2438	5.40137	1.01659	1.2875	1.40936
WMW0103	2-Cyclopentylethanol	Alcohol	C7H14O	766-00-7	0.290522	0.247513	0.268368	0.232202	0.268871	0.263367	0.355279	0.368581	0.39041	0.347032	0.373626	0.199824	0.260344	0.22922	0.222488	0.226895	0.336756	0.227357	0.148338	0.155294	0.133383	0.13458	0.133321	0.195928	0.205083	0.185082	0.176002
WMW0083	2-Decen-1-ol, (E)-	Alcohol	C10H20O	18409-18-2	0.644086	0.573529	0.620718	0.580524	0.776308	0.677625	0.74329	0.925691	0.57016	0.870368	1.05092	0.809578	0.993134	0.90256	0.798458	0.811832	0.969931	0.792722	0.420212	0.367372	0.374939	0.39099	0.423657	0.415876	0.651702	0.806153	0.704671
KMW0435	2-Decenal, (Z)-	Aldehyde	C10H18O	2497-25-8	0.402389	0.499438	0.537095	0.495672	0.481565	0.422427	0.423016	0.502607	0.321418	0.489914	0.664765	0.470102	0.63428	0.565757	0.512673	0.528355	0.807326	0.53069	0.299634	0.254891	0.265311	0.210792	0.244627	0.28916	0.470493	0.513701	0.507426
XMW0034	2-Dimethylamino-4-methyl-pent-4-enenitrile	Amine	C8H14N2	94492-10-1	0.0398217	0.031522	0.0326588	0.0272011	0.0327582	0.031166	0.0331617	0.0345159	0.0382818	0.031907	0.0337068	0.0178993	0.0173796	0.0212278	0.014788	0.015444	0.0278117	0.0211022	0.0209346	0.0219362	0.019052	0.0189089	0.0186345	0.0281369	0.0169363	0.0141911	0.0147166
D226	2-Dodecanone	Ketone	C12H24O	6175-49-1	0.00731256	0.00701943	0.00708394	0.00693913	0.00704081	0.00657193	0.0413616	0.0427437	0.0376741	0.0397972	0.0517373	0.0394687	0.0587433	0.0521365	0.0488907	0.0478932	0.0576506	0.0448573	0.264502	0.243249	0.241454	0.243106	0.252281	0.259647	0.0695606	0.082899	0.0765233
KMW0570	2-Dodecenal, (E)-	Aldehyde	C12H22O	20407-84-5	0.295927	0.263877	0.294878	0.262433	0.274245	0.251544	0.179948	0.194829	0.175235	0.171015	0.220781	0.118171	0.757265	0.670422	0.646835	0.613397	0.736259	0.58934	0.0222655	0.141723	0.133379	0.143139	0.0199891	0.181084	0.0819407	0.120237	0.106232
w42	2-Ethyl-1-dodecanol	Alcohol	C14H30O	19780-33-7	1.29296	1.08082	1.35015	1.15471	1.27179	1.13911	0.772922	1.29151	0.779583	0.851539	1.0948	0.771854	0.695304	0.600983	0.61643	0.543514	0.71009	0.555822	0.541635	0.576607	0.491781	0.51209	0.532368	0.703035	0.710106	1.00623	0.959467
D296*020	2-Ethyl-3-methoxypyrazine	Heterocyclic compound	C7H10N2O	25680-58-4	0.380205	0.361723	0.423254	0.392598	0.394138	0.334575	0.0459274	0.0533812	0.0452918	0.0484569	0.0634984	0.04849	0.0579809	0.0513821	0.0502986	0.0502879	0.0604232	0.050551	0.262807	0.246842	0.2364	0.232841	0.276381	0.267349	0.849164	0.957707	0.924493
NMW0088	2-Ethylhexyl acrylate	Ester	C11H20O2	103-11-7	0.00674618	0.00609646	0.00677463	0.00680968	0.00696606	0.00627151	0.00557899	0.00673849	0.00556623	0.00576262	0.00715924	0.00522022	0.00558426	0.00501885	0.00470693	0.00479875	0.00548814	0.00496218	0.00619136	0.00640504	0.00549184	0.00615446	0.00582088	0.00753234	0.00488427	0.00576218	0.00583455
KMW0174	2-FurancarboxAldehyde, 5-methyl-	Aldehyde	C6H6O2	620-02-0	1.45908	1.637	1.57733	1.61392	1.64483	1.27353	0.995671	1.08028	1.07141	0.92946	1.18877	1.19092	1.19932	1.05571	1.00127	1.06532	1.01943	1.04192	1.1489	1.11879	0.976234	0.900975	0.984815	1.25721	1.31874	1.43611	1.31346
D443	2-Furancarboxylic acid, hexyl ester	Ester	C11H16O3	39251-86-0	0.101594	0.093246	0.10086	0.0921244	0.0948292	0.0858002	0.199607	0.217837	0.189804	0.204719	0.256382	0.18057	0.221885	0.19388	0.189135	0.181574	0.214463	0.170942	0.0214381	0.0205898	0.0194421	0.0194728	0.0192463	0.0217767	0.12436	0.145206	0.130756
D444	2-Furancarboxylic acid, octyl ester	Ester	C13H20O3	39251-88-2	0.0313398	0.0267644	0.0271672	0.025632	0.0270377	0.0251964	0.0248416	0.0321436	0.0227564	0.025696	0.0315445	0.023827	0.0174661	0.0257247	0.021772	0.0199021	0.0228932	0.0200667	0.0224734	0.02214	0.0170064	0.0193145	0.0187565	0.0247029	0.0221514	0.0210777	0.0251019
XMW1268	2-Furancarboxylic acid, tetrahydro-3-methyl-5-oxo-	Heterocyclic compound	C6H8O4	22073-04-7	3.25881	2.80558	3.20714	2.65872	2.9966	2.67406	6.01948	6.38004	5.61301	6.05283	5.83112	3.1477	6.54595	5.84488	5.48168	5.2352	6.42273	4.90831	2.18989	1.97342	1.86965	2.38289	2.02421	2.77327	3.40053	3.7457	3.36868
KMW0207	2-Furanmethanethiol, 5-methyl-	Heterocyclic compound	C6H8OS	59303-05-8	0.207743	0.197598	0.190034	0.200755	0.182796	0.188314	0.124914	0.114973	0.115634	0.11986	0.12846	0.115336	0.129587	0.113913	0.104674	0.111112	0.103405	0.106166	0.15776	0.166076	0.168578	0.171106	0.175501	0.15819	0.145226	0.137914	0.131995
XMW0767	2-Furanmethanol, 5-ethenyltetrahydro-.alpha.,5-dimethyl-	Heterocyclic compound	C9H16O2	104188-13-8	0.00112981	0.00108452	0.00109449	0.00107211	0.00108782	0.00101538	0.00696272	0.00810219	0.0069841	0.0066224	0.00910377	0.00658684	0.00876021	0.0079019	0.00761663	0.00752101	0.00856202	0.00711302	0.00126852	0.00121832	0.00115041	0.00115223	0.00113883	0.00128855	0.0054742	0.00691278	0.00599399
D81	2-Furanpropanoic acid, ethyl ester	Heterocyclic compound	C9H12O3	10031-90-0	0.0624972	0.0423517	0.0337707	0.0362535	0.0477139	0.0455139	0.243261	0.249489	0.277966	0.270508	0.252764	0.16447	0.191237	0.168502	0.174889	0.162797	0.146459	0.165225	0.0284367	0.0246868	0.0214036	0.0225141	0.0251107	0.0332999	0.0933139	0.0994423	0.0870783
KMW0143	2-Heptanol	Alcohol	C7H16O	543-49-7	0.0139628	0.00922766	0.00859042	0.00596188	0.0092896	0.00763812	0.0176762	0.0149772	0.0159579	0.0121241	0.0125776	0.00636738	0.00745813	0.00685759	0.00804081	0.00799338	0.0108104	0.00767154	0.00552879	0.00588527	0.00451843	0.00491684	0.00403384	0.00941775	0.00810758	0.00758788	0.00615266
XMW0183	2-Heptenal, 2-methyl-	Aldehyde	C8H14O	30567-26-1	2.06769	2.10013	2.27724	2.18599	2.14406	2.01164	10.3633	11.2349	9.53581	10.8133	12.7167	9.85826	11.5389	9.08332	9.88486	9.6766	11.1755	9.58783	1.81084	1.66211	1.72371	1.44045	1.52646	1.71298	4.32698	4.89348	4.66612
D191	2-Hexanoylfuran	Heterocyclic compound	C10H14O2	14360-50-0	3.04847	2.87594	2.73638	2.71578	2.79417	2.55163	1.87715	2.12009	1.81372	1.87421	2.43384	1.8333	2.25531	1.96614	1.84206	1.8957	1.82985	1.80372	2.86252	2.80981	2.5515	2.68328	2.55378	2.97909	1.80466	1.99463	1.84605
XMW0802	2-Hydroxymethylbenzimidazole	Heterocyclic compound	C8H8N2O	22128-99-0	26.5536	24.2388	26.1452	23.9499	24.8885	22.5885	52.8448	61.1106	49.9556	54.7124	28.9637	47.5496	56.7135	50.8749	48.5267	46.8219	55.9262	44.2043	4.67701	4.49194	4.24155	4.24826	4.19884	4.75087	32.8822	37.4947	33.8648
KMW0188	2-Methyl-1,3-dithiacyclopentane	Heterocyclic compound	C4H8S2	5616-51-3	5.45103	5.30108	5.30191	4.85727	5.19885	4.89644	33.5162	34.5304	33.497	32.9057	32.1683	18.848	25.1139	23.097	20.698	21.0792	26.6409	19.5231	4.10355	3.94034	4.17165	4.12225	4.2313	4.11306	11.2305	10.1621	11.9079
KMW0097	2-Methyl-3-furanthiol	Heterocyclic compound	C5H6OS	28588-74-1	0.753165	0.731024	0.734005	0.757833	0.746014	0.776719	0.767832	0.74631	0.776516	0.770574	0.74161	0.768024	0.829879	0.792857	0.768991	0.803152	0.762162	0.765157	0.771164	0.789433	0.760007	0.792041	0.783489	0.792817	0.756116	0.732343	0.792689
D429	2-Methyl-6-(p-tolyl)hept-2-en-4-ol	Terpenoids	C15H22O	38142-57-3	0.215975	0.1595	0.166537	0.143358	0.176583	0.168127	0.44163	0.523581	0.477118	0.428289	0.553368	0.330192	0.32355	0.31544	0.302346	0.287693	0.394955	0.30176	0.156561	0.162321	0.126562	0.132915	0.118469	0.203897	0.138	0.189652	0.202242
NMW0052	2-Methyl-6-methyleneocta-2,7-dien-4-one	Terpenoids	C10H14O	539-70-8	0.219757	0.2296	0.243253	0.151447	0.236465	0.148745	0.378655	0.497643	0.385651	0.383101	0.605729	0.425679	0.382544	0.390271	0.335021	0.338989	0.409394	0.319834	0.209975	0.159028	0.153188	0.163275	0.137797	0.207574	0.192202	0.255505	0.257271
XMW1200	2-Methylbut-2-en-1-yl acetate	Alcohol	C7H12O2	33425-30-8	0.00629359	0.00580554	0.00658678	0.00658514	0.00605742	0.00678158	0.0232738	0.0233853	0.0221824	0.0249391	0.027434	0.0225903	0.0294906	0.0277829	0.0265651	0.0251242	0.0287233	0.0260467	0.00263982	0.00170109	0.00226743	0.00219738	0.00167467	0.00227371	0.0118659	0.0123663	0.0136466
XMW0269	2-Methylbutanoic anhydride	Others	C10H18O3	1468-39-9	0.19591	0.189221	0.200471	0.177757	0.195563	0.175451	0.180034	0.211898	0.196012	0.204988	0.328429	0.209364	0.198293	0.187466	0.172319	0.168652	0.198974	0.163809	0.182358	0.179042	0.162101	0.168308	0.16536	0.198106	0.185547	0.222015	0.211029
XMW1397	2-Methylindene	Aromatics	C10H10	2177-47-1	0.0223757	0.0210653	0.0216151	0.0220664	0.0207861	0.019695	0.00305559	0.0035515	0.0030133	0.00322389	0.00422461	0.00322608	0.00385753	0.0034185	0.00334642	0.0033457	0.00402002	0.00336321	0.0181461	0.017217	0.0159175	0.016256	0.016499	0.0173239	0.0291893	0.0319193	0.0311603
KMW0370	2-Methylisoborneol	Terpenoids	C11H20O	2371-42-8	0.394496	0.374797	0.368326	0.364539	0.37244	0.328241	0.624771	0.678588	0.62247	0.631848	0.797646	0.583357	0.606884	0.571023	0.516719	0.537115	0.0472607	0.503762	0.00801999	0.00770263	0.00727326	0.00728477	0.408223	0.00814664	0.394059	0.438718	0.513963
KMW0701*135	2-Naphthalenemethanol, 1,2,3,4,4a,5,6,7-octahydro-.alpha.,.alpha.,4a,8-tetramethyl-, (2R-cis)-	Terpenoids	C15H26O	1209-71-8	0.00687872	0.00469428	0.00666403	0.00613667	0.00628546	0.00648655	0.0147275	0.017572	0.0139263	0.015812	0.0202833	0.017232	0.00666594	0.000605353	0.00545713	0.00598695	0.00785744	0.0101724	0.00302005	0.00365914	0.00286235	0.00320199	0.00388134	0.00459783	0.00828077	0.00936054	0.00872151
XMW0705	2-Naphthalenemethanol, 1,2,3,4,4a,5,6,8a-octahydro-.alpha.,.alpha.,4a,8-tetramethyl-, [2R-(2.alpha.,4a.alpha.,8a.beta.)]-	Terpenoids	C15H26O	473-16-5	0.0529743	0.0450408	0.0474604	0.0433074	0.0154741	0.0143274	0.0518617	0.0659208	0.0539766	0.05614	0.0679372	0.0498975	0.0220134	0.0204484	0.0427419	0.0461906	0.054476	0.0184015	0.0332589	0.0305299	0.0262656	0.02859	0.0272539	0.0392638	0.0429843	0.0428876	0.0407453
KMW0656	2-Naphthalenemethanol, decahydro-.alpha.,.alpha.,4a-trimethyl-8-methylene-, [2R-(2.alpha.,4a.alpha.,8a.beta.)]-	Terpenoids	C15H26O	473-15-4	0.0972873	0.0830237	0.0927866	0.0868247	0.0886147	0.082203	0.182734	0.23678	0.176256	0.189944	0.259641	0.129041	0.157288	0.146937	0.142653	0.132949	0.287492	0.12704	0.0732241	0.0717167	0.0599076	0.0622908	0.0576372	0.0840276	0.0916187	0.10328	0.114346
NMW0229	2-Naphthalenol	Phenol	C10H8O	135-19-3	0.0209036	0.0190076	0.0195128	0.0183793	0.0216984	0.0184328	0.0450007	0.0384648	0.0433003	0.033511	0.0606312	0.0349389	0.0512137	0.0455604	0.0420619	0.0370081	0.044119	0.0354404	0.018622	0.0201886	0.019443	0.0200207	0.0205879	0.0234509	0.0324581	0.0339959	0.0248028
KMW0376	2-Nonanol	Alcohol	C9H20O	628-99-9	0.00809131	0.00741222	0.00837093	0.00741494	0.00750474	0.006922	0.0231639	0.0258078	0.0226978	0.0244028	0.0255486	0.0219232	0.0266948	0.0228728	0.0234762	0.02342	0.0264826	0.0229387	0.00788795	0.00808673	0.00697747	0.0076623	0.00715981	0.00819214	0.00539628	0.00694396	0.00602853
XMW1218	2-Nonanone, 3-(hydroxymethyl)-	Ketone	C10H20O2	67801-33-6	0.0768764	0.0734056	0.0730138	0.0696408	0.0730843	0.0671597	0.0535144	0.0589081	0.0449295	0.0554078	0.0622657	0.0493126	0.0113711	0.0100769	0.00986444	0.00986234	0.0118501	0.00991394	0.0747715	0.0738722	0.0666039	0.069257	0.0674982	0.0776316	0.0560818	0.0621469	0.0575647
XMW0175	2-Nonen-4-one	Ketone	C9H16O	32064-72-5	0.40479	0.422193	0.457054	0.346451	0.439657	0.31581	0.676049	0.981251	0.754545	0.679593	1.10129	0.787575	0.530224	0.479645	0.461688	0.461267	0.553055	0.439857	0.329641	0.253459	0.236414	0.252554	0.221274	0.333445	0.401594	0.47687	0.487569
KMW0343	2-Nonenal	Aldehyde	C9H16O	2463-53-8	0.392572	0.233243	0.233077	0.185488	0.251685	0.251399	0.387458	0.412483	0.471458	0.34782	0.39644	0.206348	0.298123	0.250191	0.269769	0.247836	0.303697	0.271532	0.222714	0.230915	0.175046	0.177553	0.162187	0.308464	0.2025	0.196331	0.182898
KMW0338	2-Nonenal, (E)-	Aldehyde	C9H16O	18829-56-6	0.363535	0.223905	0.217126	0.113146	0.235603	0.224114	0.358752	0.391709	0.438739	0.336997	0.343294	0.184598	0.26409	0.223123	0.232415	0.23829	0.305636	0.24005	0.20863	0.215125	0.164505	0.171954	0.156352	0.28655	0.195172	0.187311	0.176041
KMW0326	2-Nonenal, (Z)-	Aldehyde	C9H16O	60784-31-8	0.0320796	0.0248945	0.0243574	0.0197261	0.0243923	0.0173086	0.0956681	0.106214	0.0995294	0.0847746	0.0738153	0.0424305	0.0906989	0.073996	0.0749882	0.0773598	0.103008	0.0736231	0.00915532	0.00979473	0.00782861	0.00820425	0.00787828	0.012642	0.0312685	0.0436874	0.0353939
D332	2-Nonenenitrile	Nitrogen compounds	C9H15N	29127-83-1	0.0093826	0.0102648	0.00966851	0.00862176	0.0103732	0.00973985	0.0121124	0.00904535	0.0128174	0.0112205	0.0151594	0.00944015	0.00911895	0.00894543	0.0109938	0.0124368	0.0083623	0.00771336	0.00974006	0.00917461	0.00846566	0.00898554	0.00849695	0.00959682	0.00612886	0.00709268	0.00761869
KMW0194	2-Octanol	Alcohol	C8H18O	123-96-6	0.0838622	0.0669815	0.068755	0.0588462	0.0693469	0.0673716	0.107579	0.109499	0.124644	0.102865	0.111018	0.0599571	0.0771792	0.0678536	0.0665286	0.0689733	0.0912473	0.062426	0.0445535	0.0473141	0.040247	0.0403713	0.0388968	0.059553	0.0506995	0.0485457	0.0436084
KMW0187*128	2-Octanone	Ketone	C8H16O	111-13-7	0.0132413	0.0134458	0.0144374	0.013565	0.013559	0.0128951	0.0502638	0.0487966	0.0423612	0.0544284	0.0651897	0.0441615	0.0565342	0.0543901	0.0524194	0.0479908	0.050389	0.0502087	0.0108192	0.00835512	0.00864797	0.00845101	0.00861418	0.010001	0.025115	0.0282239	0.0284016
KMW0294	2-Octen-1-ol, (E)-	Alcohol	C8H16O	18409-17-1	0.225515	0.216475	0.218465	0.213999	0.217135	0.202674	1.9164	2.17297	1.8467	1.97186	2.415	1.90545	1.98101	1.75785	1.66051	1.64003	1.86379	1.63748	0.253202	0.243183	0.229627	0.22999	0.227315	0.257201	1.03318	1.24246	1.19643
WMW0217	2-Octenal, 2-butyl-	Alcohol	C12H22O	13019-16-4	0.17105	0.148774	0.170634	0.147636	0.156242	0.141116	0.51835	0.646639	0.487356	0.584331	0.740074	0.453005	0.83288	0.73407	0.707427	0.661403	0.795206	0.629804	0.28823	0.286441	0.276345	0.26418	0.266658	0.311575	0.29323	0.324601	0.335065
KMW0396	2-Octenoic acid, ethyl ester	Ester	C10H18O2	2351-90-8	0.317448	0.296012	0.278541	0.287125	0.292501	0.27637	0.182207	0.204171	0.240764	0.2515	0.318997	0.162546	0.196409	0.257612	0.241191	0.171315	0.242729	0.238144	0.289169	0.308176	0.283937	0.281724	0.258108	0.323227	0.269586	0.304814	0.267894
XMW1463	2-Oxabicyclo[2.2.2]octan-6-ol, 1,3,3-trimethyl-, acetate	Ester	C12H20O3	57709-95-2	0.0508126	0.0456683	0.0518448	0.0435668	0.0492355	0.0383661	0.107831	0.151359	0.098849	0.122495	0.160158	0.0892918	0.0600484	0.0547299	0.0521906	0.0489981	0.0619253	0.050262	0.0217755	0.020529	0.0155776	0.0151728	0.0196475	0.0280813	0.0476521	0.0684089	0.0569478
w43	2-Oxepanone	Ester	C6H10O2	502-44-3	0.00652811	0.00616638	0.00647921	0.00538141	0.00648275	0.00572917	0.0219253	0.0252041	0.0223935	0.0215093	0.0271395	0.0157205	0.0273869	0.0250978	0.0250529	0.0198951	0.0262658	0.0179128	0.00127345	0.00122306	0.00115488	0.00115671	0.00114326	0.00129356	0.00921904	0.00741925	0.00853397
D419	2-Penten-1-ol, 2-methyl-5-(2-methyl-3-methylenebicyclo[2.2.1]hept-2-yl)-, [1S-[1.alpha.,2.alpha.(E),4.alpha.]]-	Terpenoids	C15H24O	37172-32-0	0.0107293	0.00824438	0.0080706	0.00663378	0.00810602	0.00748069	0.0103812	0.0114814	0.0104927	0.0101051	0.0118933	0.00148475	0.0136453	0.01181	0.0113038	0.0111806	0.0153835	0.0103628	0.0152442	0.0147269	0.0130935	0.014017	0.0132069	0.0152365	0.0101776	0.00952978	0.00803292
D350	2-Pentenoic Acid, 2-methyl-	Acid	C6H10O2	3142-72-1	0.0053924	0.0057076	0.00651663	0.0062495	0.0060301	0.00510869	0.0202626	0.0232213	0.019314	0.0216035	0.0267639	0.0211053	0.0234089	0.0203253	0.0209562	0.0201522	0.023547	0.0198166	0.00505705	0.00441409	0.00443385	0.00461524	0.00373178	0.00461052	0.0116368	0.0110957	0.0132581
D158	2-Phenoxyethyl isobutyrate	Ester	C12H16O3	103-60-6	0.188793	0.155034	0.155246	0.157496	0.161236	0.150665	0.15874	0.177568	0.152563	0.154712	0.19563	0.135113	0.109975	0.095412	0.0899693	0.0855382	0.0741704	0.0651484	0.42544	0.396384	0.377066	0.390422	0.395188	0.44405	0.142242	0.147508	0.156237
D123	2-Propanone, 1,3-diphenyl-	Aromatics	C15H14O	102-04-5	0.0225356	0.0178602	0.0178844	0.00854061	0.0146274	0.0185847	0.0255796	0.0539461	0.0328714	0.034473	0.0539557	0.0267239	0.031309	0.026938	0.029425	0.0247228	0.0327529	0.0216642	0.00782483	0.0133644	0.00931721	0.00941301	0.00819585	0.0177853	0.0128643	0.0152466	0.0148942
KMW0487*047	2-Propen-1-ol, 3-phenyl-	Alcohol	C9H10O	104-54-1	0.262669	0.203195	0.277042	0.204685	0.251636	0.183739	0.986241	1.11289	0.935067	1.00118	1.27692	0.99171	1.20757	1.06705	1.04061	1.02464	1.17833	1.02622	0.069143	0.0647612	0.0653266	0.0621871	0.067579	0.0706775	0.403275	0.492305	0.441405
NMW0126*047	2-Propen-1-ol, 3-phenyl-, (E)-	Alcohol	C9H10O	4407-36-7	0.262669	0.203195	0.277042	0.204685	0.251636	0.183739	0.986241	1.11289	0.935067	1.00118	1.27692	0.99171	1.20757	1.06705	1.04061	1.02464	1.17833	1.02622	0.069143	0.0647612	0.0653266	0.0621871	0.067579	0.0706775	0.403275	0.492305	0.441405
NMW0195*057	2-Propen-1-ol, 3-phenyl-, acetate, (E)-	Ester	C11H12O2	21040-45-9	0.0528273	0.0389301	0.0543369	0.0383082	0.0470246	0.0371731	0.0986763	0.122202	0.0935229	0.106899	0.133555	0.105396	0.131857	0.00511435	0.11627	0.00500544	0.00601426	0.00503162	0.0273169	0.0252441	0.0231393	0.0255919	0.0262573	0.0286258	0.0651867	0.0624752	0.0567206
D111	2-Propenal, 2-methyl-3-phenyl-	Aldehyde	C10H10O	101-39-3	0.0213606	0.00637957	0.00662653	0.00602089	0.0209068	0.0194783	0.0285588	0.0334369	0.0265223	0.0312443	0.0434254	0.0348635	0.0417294	0.035577	0.036459	0.0358971	0.0370667	0.0342658	0.0022259	0.0016264	0.00205235	0.00195707	0.00201527	0.00196403	0.0173012	0.0210327	0.0197882
WMW0069*077	2-Propenal, 3-phenyl-	Aldehyde	C9H8O	104-55-2	0.00177279	0.00690713	0.00266869	0.00587515	0.00227323	0.00575711	0.00774659	0.00904607	0.00781035	0.00810177	0.0152173	0.00756985	0.0132935	0.0114134	0.0143739	0.0111737	0.0124552	0.0107996	0.000398089	0.000382336	0.000361023	0.000361595	0.000357389	0.000404375	0.0108248	0.0114573	0.0115214
NMW0268	2-Propenoic Acid, 3-(2-hydroxyphenyl)-	Acid	C9H8O3	583-17-5	0.0474035	0.0376492	0.035574	0.0366034	0.0377428	0.0350047	0.0342786	0.0426516	0.0365453	0.0334951	0.0427655	0.00477651	0.00571142	0.0050614	0.00495467	0.00495362	0.005952	0.00497954	0.0260644	0.0257737	0.0228998	0.0232675	0.0234923	0.0291324	0.0386485	0.0423921	0.041969
NMW0188	2-Propenoic Acid, 3-phenyl-	Acid	C9H8O2	621-82-9	28.7974	26.3085	28.4332	25.9983	27.0455	24.528	57.7288	66.9612	54.7296	60.106	31.8146	52.0176	62.0873	55.7202	53.1644	51.2399	61.2071	48.3408	5.13738	4.93409	4.65904	4.66641	4.61214	5.21851	35.7713	40.8562	36.9705
XMW0368	2-Propenoic acid, 2-methyl-, (tetrahydro-2-furanyl)methyl ester	Ester	C9H14O3	2455-24-5	1.12338	0.670621	0.699005	0.56911	0.77611	0.819621	3.86692	3.8136	4.65099	4.39301	3.48113	1.99102	2.87971	2.67258	2.63797	2.43314	2.86871	2.58651	0.487829	0.42835	0.372799	0.38349	0.448516	0.588251	1.4394	1.78235	1.45876
XMW0920	2-Propenoic acid, 2-methyl-, 1,2-ethanediyl ester	Ester	C10H14O4	97-90-5	0.0120352	0.0113194	0.0120397	0.0116305	0.0121844	0.0108817	0.0117062	0.0151663	0.0121103	0.0125858	0.0145073	0.0113122	0.0122926	0.012241	0.0105924	0.0116792	0.0127885	0.0115333	0.00939912	0.00999541	0.00899299	0.0090385	0.00915425	0.0107954	0.00685675	0.00952571	0.010164
XMW0062	2-Propenoic acid, 2-methyl-, 3,3,5-trimethylcyclohexyl ester	Ester	C13H22O2	7779-31-9	0.0521986	0.0459433	0.0519669	0.0445171	0.0497634	0.03768	0.100388	0.144916	0.095728	0.113918	0.14387	0.0936407	0.0607589	0.0534987	0.0517333	0.0487367	0.0633347	0.0518141	0.0403867	0.039096	0.0301248	0.0260438	0.0348696	0.0385689	0.0524484	0.0507977	0.0512994
KMW0303	2-Propenoic acid, 3-phenyl-, methyl ester	Ester	C10H10O2	19713-73-6	0.00630389	0.00624607	0.00669277	0.00548789	0.00614754	0.00476527	0.00774435	0.00843004	0.00647604	0.00697496	0.00991663	0.00849714	0.0104616	0.00982791	0.00856611	0.00828076	0.0106049	0.00848843	0.0061935	0.0054547	0.00518895	0.00576805	0.00539768	0.0062548	0.00666661	0.00849176	0.00779098
KMW0679	2-Propenoic acid, 3-phenyl-, methyl ester, (E)-	Ester	C10H10O2	1754-62-7	0.148775	0.127423	0.146931	0.126566	0.133982	0.122699	0.42228	0.481159	0.399308	0.433494	0.541128	0.33024	0.617419	0.543517	0.523037	0.491105	0.589842	0.46608	0.153077	0.133802	0.124254	0.122866	0.121673	0.14363	0.268651	0.286577	0.260293
NMW0766	2-Propenoic acid, butyl ester	Ester	C7H12O2	141-32-2	0.0465702	0.034252	0.0411298	0.0318482	0.0419661	0.0326239	0.0600123	0.0836955	0.0792573	0.0503383	0.00457404	0.0399454	0.00417659	0.00370126	0.00362321	0.00362244	0.0811763	0.00364139	0.0281325	0.0207261	0.016746	0.0184451	0.00331547	0.0534112	0.0376679	0.0278236	0.0353044
XMW0467	2-Pyridin-2-ylmethyl-cyclohexanone	Ketone	C12H15NO	113777-22-3	0.324425	0.258996	0.270579	0.248193	0.264788	0.243208	0.271795	0.286765	0.262695	0.257762	0.333965	0.231532	0.219974	0.193813	0.190714	0.180954	0.229877	0.18431	0.200266	0.182489	0.170421	0.166489	0.172879	0.222553	0.202402	0.223296	0.172221
NMW0021	2-PyridinemethanAmine	Heterocyclic compound	C6H8N2	3731-51-9	2.87958	2.76415	2.78955	2.73253	2.77257	2.58793	28.5714	31.9385	26.9188	29.4817	35.9053	27.72	29.5609	26.0821	25.2945	24.8158	27.6161	24.407	3.23312	3.10518	2.93209	2.93672	2.90257	3.28417	13.7699	15.688	15.2771
XMW0903	2-PyrrolidinemethanAmine, N-methyl-, (S)-	Heterocyclic compound	C6H14N2	66411-54-9	0.988438	0.938409	0.94682	0.900419	0.935987	0.896919	1.29429	1.15634	1.15978	1.28162	1.18709	0.821604	0.170442	0.151044	0.147859	0.147827	0.177621	0.148601	1.0133	0.794442	0.759863	0.787111	0.76762	1.05816	0.723598	1.0849	0.712128
w45	2-Tetradecene, (E)-	Hydrocarbons	C14H28	35953-54-9	0.879953	0.786692	0.651556	0.725354	0.847183	0.761664	1.01089	1.05194	1.0252	0.937977	1.14969	0.813534	0.722831	0.672759	0.526791	0.650434	0.768565	0.515839	0.278113	0.223198	0.183566	0.206331	0.23816	0.329386	0.649379	0.711015	0.575498
NMW0131	2-Thiopheneacetic acid	Heterocyclic compound	C6H6O2S	1918-77-0	0.00381767	0.00359544	0.00359226	0.00349155	0.00364245	0.00254437	0.00470003	0.00396828	0.00347307	0.00504424	0.00567457	0.00311838	0.00701963	0.00621233	0.00545557	0.00575819	0.0066547	0.00572193	0.00329102	0.00341479	0.00288896	0.00437013	0.00332601	0.00480843	0.00502108	0.0059699	0.00597611
KMW0266	2-Thiophenemethanethiol	Heterocyclic compound	C5H6S2	6258-63-5	0.355357	0.332663	0.350703	0.313509	0.338686	0.298277	0.465031	0.415491	0.424056	0.345062	0.512451	0.292847	0.0680498	0.060305	0.0590334	0.0590208	0.0709162	0.0593296	0.337517	0.332896	0.309268	0.317062	0.310496	0.354982	0.288308	0.272547	0.343049
KMW0474	2-Undecanone	Ketone	C11H22O	112-12-9	0.067838	0.0680779	0.0731261	0.0632043	0.0659938	0.0580638	0.0551831	0.0739322	0.0543839	0.0574632	0.0720274	0.0639628	0.0872231	0.0758423	0.0558899	0.0517823	0.0850228	0.0792887	0.0782675	0.0670441	0.0670729	0.0592197	0.0704036	0.0761543	0.065457	0.11012	0.0744607
w10	2-Undecanone, 6,10-dimethyl-	Ketone	C13H26O	1604-34-8	0.114904	0.079977	0.0689701	0.0749715	0.0881776	0.0796232	0.103032	0.119909	0.104764	0.0804152	0.116424	0.0524249	0.0633594	0.0553886	0.05606	0.065982	0.0486372	0.0534791	0.0286434	0.0235829	0.0187214	0.0237501	0.0244029	0.0340924	0.066478	0.0734397	0.0586913
KMW0708	2-[(2S,4aR,8aR)-4a,8-dimethyl-2,3,4,5,6,8a-hexahydro-1H-naphthalen-2-yl]propan-2-ol	Terpenoids	C15H26O	123123-38-6	0.129019	0.0944748	0.0964531	0.0841516	0.0938647	0.0959738	0.304047	0.209415	0.330722	0.170559	0.199744	0.112375	0.0959489	0.0953044	0.0942886	0.0888544	0.119943	0.0855403	0.0554861	0.0579393	0.046757	0.0482517	0.0473001	0.0759741	0.0557065	0.0518527	0.0968438
KMW0258	2-methoxy-Phenol	Phenol	C7H8O2	90-05-1	0.263448	0.252455	0.243513	0.24246	0.247893	0.214293	0.0266623	1.12951	0.998292	0.0281308	1.18016	0.935674	0.0336597	0.0298289	0.0291999	0.0291937	0.0350776	0.0293465	0.241085	0.228427	0.214667	0.221857	0.214545	0.249469	0.12271	0.160441	0.140635
KMW0385*093	2-methyl-5-(1-methylethenyl)-Cyclohexanol	Terpenoids	C10H18O	619-01-2	0.0770269	0.079342	0.0849171	0.0618121	0.079879	0.0613892	0.060438	0.0889382	0.065699	0.0594975	0.167357	0.126154	0.0750746	0.0675451	0.0656411	0.0649853	0.0774481	0.0619243	0.0576067	0.0500416	0.0498084	0.0503619	0.0468637	0.0595035	0.0657915	0.0886762	0.061507
D427	2-n-Heptylfuran	Heterocyclic compound	C11H18O	3777-71-7	0.00417817	0.00565066	0.00692548	0.00577794	0.00626962	0.00524625	0.00454139	0.00536499	0.00263633	0.00590334	0.00908953	0.00773892	0.00804871	0.0079369	0.00632308	0.00647971	0.00813031	0.00614752	0.00609213	0.00522134	0.00572765	0.00586463	0.00660401	0.00602974	0.00598149	0.00566285	0.00711994
XMW0370	2H-1-Benzopyran, 3,4,4a,5,6,8a-hexahydro-2,5,5,8a-tetramethyl-, (2.alpha.,4a.alpha.,8a.alpha.)-	Aromatics	C13H22O	41678-32-4	0.0342391	0.0226921	0.0301374	0.032777	0.027867	0.0285897	0.146288	0.165824	0.141168	0.104004	0.131302	0.102036	0.125832	0.109805	0.101755	0.105697	0.147108	0.106763	0.0107648	0.0100672	0.00936928	0.0100627	0.0102534	0.0111368	0.0671565	0.0761645	0.0707657
D195	2H-1-Benzopyran-2-one, 4-hydroxy-	Heterocyclic compound	C9H6O3	1076-38-6	0.0358403	0.0238798	0.0238317	0.0224039	0.0256833	0.02616	0.0653134	0.0776917	0.072758	0.0663932	0.0778811	0.0447142	0.0383074	0.0360248	0.0359586	0.0342675	0.0460142	0.0325294	0.0176418	0.0171127	0.0129567	0.0135135	0.0129277	0.026123	0.024494	0.0241653	0.0231157
D337	2H-2a,7-Methanoazuleno[5,6-b]oxirene, octahydro-3,6,6,7a-tetramethyl-	Terpenoids	C15H24O	29597-36-2	0.22287	0.153355	0.158713	0.143075	0.162571	0.165995	0.483577	0.574322	0.463931	0.456487	0.495956	0.314028	0.265049	0.231404	0.230432	0.231669	0.355563	0.261246	0.124018	0.127851	0.105794	0.106978	0.0991302	0.157901	0.152388	0.170535	0.189035
NMW0212	2H-Indol-2-one, 1,3-dihydro-	Heterocyclic compound	C8H7NO	59-48-3	1.13619	1.05345	1.04904	1.13051	1.1075	1.06243	3.69549	4.2299	3.35951	3.85674	4.8592	3.19039	6.74612	5.98004	5.7103	5.3415	6.44268	5.19225	1.47308	1.48788	1.38564	1.44627	1.34589	1.677	2.97174	3.21593	3.00162
QWM0003	2H-Pyran, 3,6-dihydro-4-methyl-2-(2-methyl-1-propenyl)-	Terpenoids	C10H16O	1786-08-9	0.0519119	0.031218	0.0360489	0.0182945	0.0330628	0.036847	0.0580088	0.0901667	0.101138	0.0777022	0.0832199	0.0450577	0.0549171	0.0472674	0.048323	0.0513247	0.0648139	0.0475895	0.0355733	0.0369008	0.0276595	0.0291346	0.0263645	0.0480188	0.0349316	0.0325715	0.0304083
w21	2H-Pyran-2-one, 6-pentyl-	Heterocyclic compound	C10H14O2	27593-23-3	2.29243	2.03418	2.28868	2.03158	2.13472	1.92818	2.69719	3.11268	2.5816	2.7625	3.54478	0.862032	4.35179	3.87516	3.66853	3.628	4.20887	3.37511	0.345728	1.26364	1.19145	1.23106	0.312558	0.501238	0.806606	1.03473	0.929019
XMW0362	2H-Pyran-2-one, tetrahydro-4,6,6-trimethyl-	Heterocyclic compound	C8H14O2	20628-36-8	0.0119213	0.0110114	0.00309161	0.00952237	0.0026117	0.0093015	0.0441656	0.0475639	0.0520313	0.0422003	0.0509635	0.0274049	0.040011	0.0374873	0.0411781	0.0422302	0.0506187	0.0393271	0.000609104	0.000585001	0.000552391	0.000553265	0.00054683	0.000618723	0.0233245	0.0233444	0.0232382
WMW0176	2H-Pyran-2-one, tetrahydro-6-methyl-	Heterocyclic compound	C6H10O2	823-22-3	0.462152	0.435116	0.455384	0.408941	0.439334	0.420094	1.36912	2.51863	0.8538	1.39496	2.85154	1.98945	1.32729	2.22095	1.39077	1.52352	2.56801	1.55805	0.452161	0.405111	0.402809	0.41152	0.418991	0.452963	0.311643	0.445053	0.406116
w19	2H-Pyran-2-one, tetrahydro-6-propyl-	Heterocyclic compound	C8H14O2	698-76-0	1.90845	1.9361	2.00465	1.96931	1.93086	1.62901	2.04319	2.70654	1.91357	2.04977	2.63361	2.3265	3.15763	2.75846	2.62818	2.63373	3.09877	2.55564	1.61	1.76643	1.70637	1.42759	1.46865	1.57843	2.23784	2.67374	2.49098
KMW0058*035	2H-Pyran-3-ol, 6-ethenyltetrahydro-2,2,6-trimethyl-	Heterocyclic compound	C10H18O2	14049-11-7	0.436206	0.400716	0.409504	0.39482	0.401327	0.339918	0.312089	0.371752	0.30692	0.309146	0.367899	0.303948	0.375898	0.330825	0.283821	0.30707	0.314574	0.28963	0.370961	0.353503	0.320009	0.323924	0.331865	0.388009	0.385937	0.432384	0.381816
D380	3(2H)-Furanone, 2-hexyl-5-methyl-	Heterocyclic compound	C11H18O2	33922-66-6	0.0101335	0.00813243	0.00809319	0.00879776	0.00862335	0.00797636	0.00988195	0.0107451	0.00956582	0.00958749	0.0125923	0.0111839	0.0122709	0.0107355	0.0107947	0.00996499	0.0127046	0.0100082	0.0039815	0.00475169	0.00403584	0.00410441	0.00367105	0.00468967	0.00713955	0.00796769	0.00707742
KMW0167	3(2H)-Thiophenone, dihydro-2-methyl-	Heterocyclic compound	C5H8OS	13679-85-1	0.0283657	0.0275866	0.0295584	0.0245117	0.0270875	0.0257434	0.0606767	0.0632346	0.0552156	0.0615717	0.0665896	0.0668745	0.068727	0.0628957	0.0675347	0.0582918	0.0719691	0.0584247	0.010782	0.0115165	0.0105389	0.0106655	0.0118758	0.0119513	0.0345016	0.0328709	0.0315738
XMW0923	3,3-Dimethyl-6-methylenecyclohexene	Hydrocarbons	C9H14	20185-16-4	0.701571	0.680861	0.725782	0.711785	0.66854	0.732471	1.24737	1.31723	0.851797	1.28407	1.01286	0.99517	2.09988	1.87708	1.78238	1.75473	1.90781	1.77213	0.375336	0.378279	0.361676	0.355386	0.393499	0.398592	0.908008	0.748959	0.762332
XMW0539	3,4-Dimethoxytoluene	Aromatics	C9H12O2	494-99-5	0.00905156	0.00636843	0.00859411	0.00745142	0.0082034	0.00560246	0.138375	0.156751	0.129435	0.136131	0.181515	0.0772202	0.185727	0.167428	0.152963	0.15475	0.218863	0.141426	0.00456727	0.00387869	0.0031148	0.00326669	0.00321251	0.00442605	0.0313041	0.0371337	0.0344541
XMW0117	3,4-Dimethylcyclohexanol	Alcohol	C8H16O	5715-23-1	0.402282	0.272445	0.291721	0.222016	0.282857	0.320819	0.616757	0.730861	0.728023	0.598759	0.864118	0.450993	0.388144	0.347083	0.365599	0.347193	0.451091	0.344362	0.209466	0.261841	0.163784	0.174926	0.152824	0.315513	0.263891	0.332822	0.298656
XMW1335	3,4-Hexanedione, 2,2,5-trimethyl-	Ketone	C9H16O2	20633-03-8	0.0535158	0.0503847	0.0519939	0.0502822	0.0508914	0.0471843	0.00630897	0.00733289	0.00622166	0.00665646	0.00872268	0.0759193	0.00796475	0.00705828	0.00690944	0.00690797	0.00830025	0.00694412	0.0365462	0.0340271	0.0332408	0.032717	0.031613	0.0366139	0.0521452	0.0672322	0.0607636
D362	3,4-Methylenedioxybenzyl acetate	Ester	C10H10O4	326-61-4	0.00884544	0.00664015	0.00800973	0.00650444	0.00818536	0.00585311	0.0148169	0.0146035	0.0146951	0.0148629	0.0174728	0.0150938	0.0238091	0.020519	0.00143481	0.0168455	0.00172362	0.0164503	0.00934685	0.0014046	0.0013263	0.0081623	0.00131295	0.00148556	0.0140106	0.0142679	0.0127171
XMW0391	3,5,11-Eudesmatriene	Terpenoids	C15H22	193615-07-5	0.0725124	0.0600503	0.065574	0.059904	0.0626398	0.0580808	0.0529982	0.0734849	0.0711741	0.0653862	0.0713925	0.0435425	0.041889	0.04155	0.0380479	0.0371452	0.0484483	0.0364777	0.0385702	0.0270924	0.0262089	0.0265818	0.0267873	0.0436959	0.039784	0.041785	0.0495254
XMW0275	3,5,9-Undecatrien-2-one, 6,10-dimethyl-	Ketone	C13H20O	141-10-6	0.0311903	0.0215019	0.0223146	0.0192555	0.0204638	0.0234629	0.0457413	0.0542833	0.0481706	0.0435125	0.057107	0.0341536	0.0199001	0.0171263	0.0185873	0.0169403	0.0226937	0.0258019	0.0213448	0.021949	0.0181519	0.0181657	0.0162361	0.0280799	0.0179997	0.0188246	0.0195934
w11	3,5,9-Undecatrien-2-one, 6,10-dimethyl-, (E,Z)-	Ketone	C13H20O	13927-47-4	3.40625	2.78049	3.30731	2.70397	2.98911	2.61504	3.62887	3.30893	3.05878	2.89668	4.70706	3.06548	3.10802	3.28712	3.11936	2.61988	3.04337	2.4392	2.62059	2.39872	2.15128	2.30501	2.3842	2.68254	2.82465	3.00975	2.82143
XMW0834	3,5-Dihydroxy-4'-methoxydiphenyl	Alcohol	C13H12O3	54960-96-2	0.0075861	0.00986881	0.0119282	0.00917587	0.00901619	0.00998047	0.00479393	0.0111448	0.00708549	0.00492804	0.00695437	0.00660357	0.00817479	0.0100235	0.0102261	0.00818578	0.011274	0.00747577	0.0051746	0.0104858	0.00636586	0.0137413	0.00615759	0.0107664	0.00723987	0.0077335	0.00949943
XMW0422	3,5-Dimethyldodecane	Hydrocarbons	C14H30	107770-99-0	0.532861	0.543537	0.578798	0.504559	0.52386	0.462949	1.02005	1.14404	0.951672	1.00492	1.28228	0.985725	1.14284	0.997996	0.95329	0.956295	1.11467	0.918601	0.596589	0.584096	0.555866	0.515716	0.511205	0.578351	0.695539	0.856005	0.782146
KMW0280*139	3,5-Octadien-2-one	Ketone	C8H12O	38284-27-4	0.569753	0.542256	0.540942	0.506435	0.536808	0.476664	2.5255	2.02409	2.33121	2.54256	2.78154	2.1874	7.09804	2.71412	2.57229	2.55489	6.57667	2.46917	0.535625	0.529402	0.488276	0.501111	0.485957	0.551739	0.321453	0.400985	0.362032
XMW0186*139	3,5-Octadien-2-one, (E,E)-	Ketone	C8H12O	30086-02-3	0.569753	0.542256	0.540942	0.506435	0.536808	0.476664	2.5255	2.02409	2.33121	2.54256	2.78154	2.1874	7.09804	2.71412	2.57229	2.55489	6.57667	2.46917	0.535625	0.529402	0.488276	0.501111	0.485957	0.551739	0.321453	0.400985	0.362032
XMW0254	3,5-di-tert-Butyl-4-hydroxybenzAldehyde	Aldehyde	C15H22O2	1620-98-0	0.00780008	0.00699618	0.0075388	0.000520192	0.00869779	0.00944363	0.00400641	0.0127819	0.0087246	0.0104704	0.0106519	0.00835615	0.018244	0.0128842	0.0143163	0.0132461	0.0132376	0.00989898	0.000615489	0.00503223	0.00339461	0.00433881	0.00276281	0.00682824	0.00679304	0.00745389	0.00787366
XMW1172	3,6-Dimethyl-4H-furo[3,2-c]pyran-4-one	Heterocyclic compound	C9H8O3	36745-38-7	0.032604	0.0280601	0.0328445	0.0274902	0.0296823	0.0263401	0.0909885	0.0969651	0.0852828	0.0900799	0.113667	0.0714899	0.172939	0.153427	0.112663	0.106326	0.126694	0.102096	0.128605	0.115793	0.129525	0.133976	0.12575	0.124376	0.074364	0.10619	0.0937988
D298	3,6-Heptadien-2-ol, 2,5,5-trimethyl-, (E)-	Alcohol	C10H18O	26127-98-0	0.0068181	0.00637266	0.00638917	0.00632547	0.00618394	0.00594679	0.00523815	0.00482674	0.00522791	0.00477015	0.0052942	0.00501724	0.00564764	0.00489472	0.00456804	0.00457766	0.0044824	0.00436636	0.00482724	0.00478437	0.00453798	0.00465718	0.00511587	0.0045297	0.00507695	0.0053596	0.00558156
KMW0531	3,6-Nonadien-1-ol, (E,Z)-	Alcohol	C9H16O	56805-23-3	0.129701	0.0833042	0.0822816	0.0665098	0.0872766	0.0739656	0.129569	0.202469	0.148713	0.122381	0.190174	0.107474	0.129225	0.110805	0.113992	0.116663	0.152599	0.109018	0.0693515	0.071033	0.0555777	0.0578332	0.0529302	0.0917634	0.0893791	0.0855377	0.0777017
KMW0447	3,6-Octadien-1-ol, 3,7-dimethyl-, (Z)-	Terpenoids	C10H18O	5944-20-7	0.86855	0.820496	0.762579	0.756586	0.785015	0.705666	0.734488	0.848199	0.690547	0.709671	0.907758	0.685789	0.848772	0.723786	0.683887	0.714125	0.676715	0.665154	0.78273	0.76986	0.706333	0.748651	0.706934	0.841668	0.790293	0.933219	0.830514
NMW0214	3-(4-Hydroxyphenyl)propanal	Aldehyde	C9H10O2	20238-83-9	2.22794	1.74485	2.82993	1.86084	1.91415	1.7264	3.20034	3.578	3.03397	3.28093	4.16193	2.04197	4.23388	3.72685	3.48076	4.16476	4.92079	4.02535	0.969664	0.811932	0.786987	0.858261	0.862234	1.00136	2.54723	2.77964	2.57191
XMW0714	3-Acetyl-1H-pyrroline	Heterocyclic compound	C6H7NO	1072-82-8	5.52506	5.43256	6.07869	5.42595	5.4118	5.08543	21.1403	23.3447	19.2417	21.3929	26.26	20.6316	27.2963	24.0667	23.466	23.014	26.7039	22.6347	2.54589	2.34964	2.44542	2.4826	2.6431	2.41175	11.5328	12.9771	10.2421
XMW0274	3-Acetyl-2-oxo-1,3-oxazolidine	Heterocyclic compound	C5H7NO3	1432-43-5	0.00724047	0.00717022	0.00696387	0.00648304	0.00704474	0.00609629	0.00510296	0.00377305	0.00328702	0.00512608	0.00613547	0.00456276	0.00479424	0.00486696	0.00418349	0.00439059	0.0047905	0.00469655	0.00674868	0.00706418	0.00642762	0.00614264	0.00670549	0.00754372	0.00513225	0.00574597	0.0059031
XMW0198	3-Buten-2-ol, 4-(2,6,6-trimethyl-2-cyclohexen-1-yl)-, (3E)-	Alcohol	C13H22O	25312-34-9	0.00410154	0.00376698	0.00356606	0.00371502	0.00409018	0.00363984	0.034341	0.0394575	0.0319688	0.0344263	0.0437204	0.031268	0.0442139	0.0394791	0.0379292	0.0350198	0.0435338	0.0363557	0.00175444	0.00234355	0.00160466	0.00155373	0.00158383	0.00256283	0.0265743	0.0302186	0.0248435
KMW0639	3-Buten-2-one, 4-(2,2,6-trimethyl-7-oxabicyclo[4.1.0]hept-1-yl)-	Terpenoids	C13H20O2	23267-57-4	0.351791	0.269806	0.436726	0.29038	0.306398	0.272841	0.480132	0.538371	0.452751	0.490966	0.622954	0.304969	0.619186	0.544173	0.538273	0.549465	0.795096	0.645028	0.140053	0.12305	0.119907	0.12466	0.124719	0.145153	0.396789	0.42765	0.394221
w24	3-Buten-2-one, 4-(4-hydroxy-2,2,6-trimethyl-7-oxabicyclo[4.1.0]hept-1-yl)-	Ketone	C13H20O3	38274-01-0	0.13937	0.0996334	0.104708	0.0577538	0.104985	0.103262	0.152308	0.179846	0.160659	0.148028	0.193992	0.202143	0.1596	0.152068	0.147996	0.14009	0.194304	0.143728	0.0608434	0.0642624	0.0484639	0.050852	0.0466019	0.081926	0.101469	0.108926	0.116837
NMW0356	3-Buten-2-one, 4-(4-hydroxy-3-methoxyphenyl)-	Ketone	C11H12O3	1080-12-2	0.0141738	0.0093205	0.00970842	0.00604351	0.00919865	0.01297	0.0135135	0.0363152	0.0225693	0.0233456	0.0311609	0.0167626	0.0377434	0.0298983	0.0336555	0.0280492	0.0285622	0.0229918	0.00646887	0.0139731	0.00704628	0.0106953	0.00564801	0.0183656	0.0113547	0.0131822	0.0135463
XMW1460	3-Buten-2-one, 4-phenyl-	Ketone	C10H10O	122-57-6	0.00761239	0.00660997	0.0106077	0.0069188	0.00627822	0.00869994	0.0262626	0.0252241	0.0243991	0.0246508	0.031058	0.0224687	0.0172644	0.0141701	0.0142385	0.0128945	0.015574	0.0119228	0.010357	0.00550497	0.00584933	0.00575409	0.00627508	0.010027	0.014621	0.0144305	0.0109584
NMW0281	3-Butylisobenzofuran-1(3H)-one	Heterocyclic compound	C12H14O2	6066-49-5	0.11607	0.0989364	0.110271	0.103042	0.0995236	0.0888037	0.188678	0.232114	0.18446	0.195772	0.18177	0.115647	0.124816	0.110729	0.104808	0.134145	0.169499	0.125849	0.0823462	0.0727488	0.0683218	0.0730485	0.0706621	0.0963527	0.123666	0.132096	0.104961
KMW0220*015	3-Carene	Terpenoids	C10H16	13466-78-9	4.44126	4.35249	4.65191	3.89525	4.26332	3.40134	7.16084	7.6994	6.57513	7.31808	7.48873	6.58444	5.75518	5.30626	4.81411	4.8424	5.13268	4.99152	1.67879	1.68095	1.57719	1.60782	1.81602	1.78987	5.11927	4.96376	4.932
KMW0664	3-Cyclohexen-1-ol, 1-(1,5-dimethyl-4-hexenyl)-4-methyl-	Terpenoids	C15H26O	15352-77-9	0.122172	0.118983	0.123207	0.10996	0.13218	0.134568	0.250605	0.29056	0.334734	0.239268	0.305497	0.142582	0.156776	0.141558	0.139505	0.132934	0.186544	0.134286	0.0919031	0.120092	0.0706656	0.0763391	0.0717041	0.167298	0.0966296	0.080474	0.115295
KMW0325	3-Cyclohexen-1-ol, 1-methyl-4-(1-methylethyl)-	Terpenoids	C10H18O	586-82-3	0.306491	0.321038	0.340245	0.265649	0.325642	0.270807	0.714359	0.872446	0.720076	0.72469	0.989308	0.65428	0.852109	0.782463	0.694126	0.716273	0.865827	0.693236	0.169993	0.146661	0.172446	0.149035	0.207228	0.165402	0.401291	0.477722	0.443524
XMW0900	3-Cyclohexen-1-one, 3,5,5-trimethyl-	Ketone	C9H14O	471-01-2	0.0660036	0.0634055	0.0610466	0.0648323	0.0592043	0.0589807	0.0336312	0.031665	0.0328802	0.030684	0.0346266	0.0312313	0.0336488	0.0313535	0.0280425	0.0296873	0.0275057	0.0284103	0.0470593	0.0473227	0.0485822	0.0490377	0.0515365	0.0451275	0.0440265	0.0436334	0.040415
D354	3-Cyclohexene-1-carboxAldehyde, 4-(4-hydroxy-4-methylpentyl)-	Aldehyde	C13H22O2	31906-04-4	0.0411121	0.025392	0.029178	0.0251681	0.0289588	0.0277517	0.0659121	0.0805865	0.0802093	0.0597661	0.0732306	0.151536	0.120542	0.115275	0.117391	0.103821	0.1261	0.11085	0.0211298	0.0228377	0.0177677	0.0184928	0.016961	0.0257706	0.0657545	0.0841849	0.0851435
D425	3-Cyclohexene-1-carboxAldehyde, 4-(4-methyl-3-pentenyl)-	Aldehyde	C13H20O	37677-14-8	9.85959	11.0521	12.6273	10.6811	10.1498	9.87187	1.67783	1.95014	1.65461	1.77024	2.31974	1.77145	2.11818	1.87711	1.83752	1.83713	2.2074	1.84675	9.76253	9.122	8.49278	8.72505	8.78875	9.99742	10.3853	10.9367	9.83299
KMW0588	3-Cyclohexene-1-ethanol, .beta.,4-dimethyl-	Alcohol	C10H18O	18479-68-0	6.50867	6.38662	6.67862	6.16813	6.2998	5.67478	22.3293	25.5976	21.7431	22.1543	28.1412	21.7249	21.9689	19.3714	18.7375	18.5967	21.592	18.1741	5.62402	5.30465	5.09627	5.12078	5.19571	5.71082	11.4774	13.5978	12.6873
KMW0466	3-Cyclohexene-1-methanethiol, .alpha.,.alpha.,4-trimethyl-	Sulfur compounds	C10H18S	71159-90-5	39.0486	40.5639	42.6094	37.0043	39.8707	34.6102	138.45	158.102	132.875	138.253	175.675	135.765	135.963	121.626	116.303	116.135	130.883	112.57	34.0963	32.1533	31.2881	31.227	31.4562	34.8153	73.417	84.2657	78.3151
D340	3-Hexanone, 1-phenyl-	Ketone	C12H16O	29898-25-7	41.1916	37.9937	41.7212	37.8268	39.0371	35.5992	4.32406	5.02583	4.26422	4.56222	5.97837	4.56533	5.4589	4.83762	4.73561	4.7346	5.68884	4.75937	25.0758	23.1794	22.1377	22.7315	23.0389	25.921	51.2472	59.2392	53.3963
KMW0098	3-Hexen-1-ol, (Z)-	Alcohol	C6H12O	928-96-1	0.349845	0.314669	0.3133	0.326322	0.319555	0.334652	0.337076	0.314859	0.34046	0.334316	0.313731	0.333277	0.365687	0.345733	0.338465	0.34843	0.332035	0.3341	0.326354	0.341693	0.330358	0.344645	0.3399	0.336721	0.326568	0.341348	0.345593
D417*079	3-Hexen-1-ol, acetate, (E)-	Ester	C8H14O2	3681-82-1	0.268216	0.21167	0.21874	0.185021	0.21823	0.211701	0.360785	0.328439	0.26003	0.313713	0.363784	0.122782	0.162841	0.143645	0.138474	0.142888	0.228186	0.144662	0.138177	0.144316	0.122794	0.125666	0.123415	0.186807	0.115155	0.0912231	0.0950946
KMW0196*079	3-Hexen-1-ol, acetate, (Z)-	Ester	C8H14O2	3681-71-8	0.268216	0.21167	0.21874	0.185021	0.21823	0.211701	0.360785	0.328439	0.26003	0.313713	0.363784	0.122782	0.162841	0.143645	0.138474	0.142888	0.228186	0.144662	0.138177	0.144316	0.122794	0.125666	0.123415	0.186807	0.115155	0.0912231	0.0950946
D371	3-Hexen-1-ol, formate, (Z)-	Ester	C7H12O2	33467-73-1	0.0549217	0.0547827	0.062473	0.057386	0.0585958	0.0549402	0.173291	0.210523	0.161435	0.178684	0.243502	0.196591	0.220081	0.205977	0.195061	0.186529	0.212068	0.191099	0.0201846	0.0149163	0.0155999	0.0161329	0.0164443	0.0187474	0.106717	0.114924	0.119446
D313	3-Hexene, 1-(1-ethoxyethoxy)-, (Z)-	Aldehyde	C10H20O2	28069-74-1	1.04871	1.00667	1.01592	0.995153	1.00974	0.942492	15.6991	17.3871	14.7946	15.9716	9.15152	5.56828	1.33163	1.18008	19.8393	19.1884	20.5519	18.8403	1.17746	1.13087	1.06783	1.06952	1.05708	1.19606	9.44192	10.7065	10.3828
XMW0774	3-Hexene, 1-(1-methoxyethoxy)-, (Z)-	Hydrocarbons	C9H18O2	54340-96-4	0.0757265	0.0729035	0.0531332	0.0741495	0.0474244	0.0640134	0.0911269	0.0880249	0.0827219	0.0930144	0.0934942	0.0816607	0.0729783	0.0643916	0.0595132	0.0607806	0.0652618	0.061352	0.0346248	0.0339998	0.032561	0.0321393	0.0361959	0.0357799	0.0673574	0.0652956	0.0677901
XMW1385	3-Imidazol-1-ylpropanenitrile	Heterocyclic compound	C6H7N3	23996-53-4	0.0563698	0.0554775	0.0574966	0.0476454	0.0556583	0.0503911	0.202405	0.241139	0.197883	0.199745	0.261597	0.143173	0.197941	0.120922	0.126698	0.126904	0.209641	0.116848	0.0642705	0.0577952	0.0594891	0.0655632	0.0453115	0.0816494	0.0986621	0.11323	0.12951
XMW0091	3-Isopropylidene-5-methyl-hex-4-en-2-one	Ketone	C10H16O	64149-32-2	0.113041	0.10851	0.109507	0.107268	0.10884	0.101592	0.914285	2.37154	1.0824	0.904333	2.76708	2.07022	0.792754	1.42736	0.634604	0.624811	1.51662	0.625721	0.126919	0.121897	0.115102	0.115284	0.113943	0.128924	2.02064	2.21514	2.07633
KMW0169	3-Mercapto-3-methylbutanol	Alcohol	C5H12OS	34300-94-2	0.0130764	0.0125549	0.0139313	0.012782	0.0135507	0.0127287	0.0420983	0.0466553	0.0395883	0.0442224	0.0518436	0.0416336	0.0476584	0.0439929	0.0415378	0.04039	0.0471491	0.0409781	0.00799481	0.00775712	0.00932636	0.00877562	0.00906189	0.00953191	0.0221037	0.0226154	0.0249737
KMW0213	3-Mercapto-3-methylbutyl formate (ester)	Ester	C6H12O2S	50746-10-6	0.573671	0.55284	0.497092	0.513771	0.556126	0.508124	2.84671	2.8808	2.82105	2.78357	3.19779	1.6384	2.19865	2.01944	1.81261	1.8492	2.30428	1.71543	0.380101	0.355465	0.372147	0.35973	0.369654	0.375298	0.721595	0.725703	0.774675
KMW0608	3-Mercaptohexanol	Alcohol	C6H14OS	51755-83-0	0.205679	0.215483	0.232415	0.176219	0.224038	0.157274	0.387002	0.491306	0.376522	0.394875	0.557075	0.39935	0.268807	0.242675	0.234671	0.233418	0.27859	0.222535	0.15081	0.124668	0.118216	0.125876	0.110237	0.152161	0.203234	0.236798	0.220996
KMW0255*020	3-Methoxy-2,5-dimethylpyrazine	Heterocyclic compound	C7H10N2O	19846-22-1	0.380205	0.361723	0.423254	0.392598	0.394138	0.334575	0.0459274	0.0533812	0.0452918	0.0484569	0.0634984	0.04849	0.0579809	0.0513821	0.0502986	0.0502879	0.0604232	0.050551	0.262807	0.246842	0.2364	0.232841	0.276381	0.267349	0.849164	0.957707	0.924493
D356	3-Methoxy-5-methylphenol	Phenol	C8H10O2	3209-13-0	0.0465036	0.0444669	0.0487566	0.0429651	0.0441226	0.0387967	0.18386	0.210601	0.156098	0.177513	0.222386	0.176783	0.210752	0.187147	0.186376	0.184983	0.207163	0.177392	0.0156849	0.0149503	0.0145835	0.0143658	0.0156575	0.0172316	0.0963928	0.116287	0.107026
XMW1490	3-MethoxycinnamAldehyde	Aldehyde	C10H10O2	56578-36-0	0.331747	0.308232	0.330382	0.326371	0.323581	0.301407	0.889505	0.714883	0.815325	0.638793	1.17295	0.680804	0.979613	0.881672	0.866246	0.72569	0.849529	0.635348	0.269737	0.240722	0.229362	0.245107	0.253787	0.279081	0.504417	0.643853	0.573718
XMW0533	3-Methylbenzothiophene	Heterocyclic compound	C9H8S	1455-18-1	0.01489	0.0105878	0.0162678	0.016171	0.0164634	0.0139103	0.0534014	0.0603292	0.0494251	0.0545049	0.0704053	0.0550147	0.06684	0.0575218	0.0835109	0.0556414	0.0705345	0.0654206	0.00569351	0.00505241	0.00502334	0.00504211	0.005088	0.00570676	0.0329853	0.0395604	0.0354055
XMW0073*145	3-Methylheptyl acetate	Ester	C10H20O2	72218-58-7	1.37694	1.24804	1.73023	1.19193	1.33633	1.16364	3.15774	2.88994	2.59939	3.23057	3.63467	2.18373	0.257503	0.228196	0.223384	0.223337	0.26835	0.224505	1.17056	1.0934	1.05226	1.06289	1.09239	1.19361	1.47112	1.83016	1.64741
WMW0100	3-Nonen-1-ol, (E)-	Alcohol	C9H18O	10339-61-4	0.00743671	0.00680726	0.00767138	0.00661743	0.0062082	0.00644056	0.00809234	0.00934553	0.00792917	0.00837944	0.00934264	0.0213466	0.0122319	0.0110269	0.00951336	0.0101661	0.0117501	0.00981482	0.00510551	0.00461243	0.00432176	0.00509724	0.00442307	0.00562757	0.0053866	0.00548195	0.0086399
WMW0062	3-Nonen-1-ol, (Z)-	Alcohol	C9H18O	10340-23-5	0.315097	0.189715	0.18768	0.148297	0.205621	0.180328	0.321909	0.341475	0.39193	0.289136	0.390229	0.213835	0.255335	0.215275	0.201345	0.208068	0.249185	0.227951	0.17874	0.184733	0.139844	0.142494	0.129937	0.247988	0.168676	0.165223	0.153672
XMW0917	3-Nonen-5-one	Ketone	C9H16O	82456-34-6	0.0120141	0.0117976	0.0120209	0.0119793	0.01114	0.0105632	0.0118497	0.00966154	0.0100506	0.0123067	0.0114824	0.00957109	0.00978824	0.00838903	0.00768797	0.00833073	0.0098651	0.00819743	0.0128656	0.0133974	0.0134494	0.0136004	0.0140044	0.0126346	0.0131677	0.0137802	0.0140375
KMW0202	3-Octanol	Alcohol	C8H18O	589-98-0	0.00675265	0.00360272	0.00384942	0.0034486	0.00345621	0.00337161	0.0125317	0.0143797	0.0124601	0.0135782	0.0163322	0.0127814	0.017788	0.0162379	0.0120168	0.0114047	0.0196087	0.011417	0.00384085	0.00161143	0.0025071	0.00238206	0.00262923	0.00459419	0.00761067	0.00793283	0.00865886
KMW0161*128	3-Octanone	Ketone	C8H16O	106-68-3	0.0132413	0.0134458	0.0144374	0.013565	0.013559	0.0128951	0.0502638	0.0487966	0.0423612	0.0544284	0.0651897	0.0441615	0.0565342	0.0543901	0.0524194	0.0479908	0.050389	0.0502087	0.0108192	0.00835512	0.00864797	0.00845101	0.00861418	0.010001	0.025115	0.0282239	0.0284016
WMW0127	3-Octen-1-ol, (Z)-	Alcohol	C8H16O	20125-84-2	0.0547201	0.0530456	0.0640677	0.0577287	0.0561056	0.0519923	0.269075	0.284724	0.248743	0.279883	0.31527	0.252841	0.363645	0.32066	0.296947	0.29867	0.331725	0.296084	0.05871	0.0540629	0.0548586	0.0560021	0.0592189	0.0569503	0.178919	0.222269	0.184657
D366	3-Octen-2-one, 7-methyl-	Ketone	C9H16O	33046-81-0	0.073779	0.0746711	0.0813651	0.0631459	0.0808355	0.067137	0.157476	0.208599	0.154992	0.157034	0.217836	0.152166	0.111823	0.0982375	0.098979	0.0989243	0.101544	0.0928003	0.0603023	0.0538938	0.0491645	0.0528124	0.0477003	0.060221	0.0720896	0.100645	0.088314
XMW0162	3-Penten-2-one, 4-(acetyloxy)-, (Z)-	Ketone	C7H10O3	38365-58-1	0.158267	0.124898	0.128428	0.108181	0.128743	0.126163	0.141961	0.142689	0.161728	0.133533	0.139379	0.0752192	0.0989294	0.0859445	0.0827273	0.0872254	0.116897	0.0883083	0.0810752	0.0859993	0.0736432	0.0743454	0.0718072	0.109714	0.0700119	0.0566722	0.0582964
XMW1237	3-Pentenoic Acid, 2,2-dimethyl-	Acid	C7H12O2	16642-52-7	0.0630933	0.00795294	0.0141123	0.0134516	0.0111608	0.0104382	0.0882302	0.0873696	0.0998535	0.0856872	0.0995088	0.0456904	0.0489052	0.0450141	0.0417506	0.0407217	0.0485547	0.0413099	0.00632758	0.00594406	0.00586023	0.0054913	0.00596614	0.0429902	0.0497499	0.0498912	0.0492787
NMW0161	3-Phenyl-1-propanol, acetate	Ester	C11H14O2	122-72-5	0.0791886	0.0760143	0.0767129	0.0751447	0.0762458	0.0711682	0.0796487	0.0925754	0.0785465	0.0840356	0.110121	0.0840929	0.100552	0.0891085	0.0872295	0.087211	0.104788	0.0876673	1.39786	1.27435	1.30558	1.30181	1.34262	1.36067	0.397849	0.492775	0.420121
KMW0442	3-Phenylpropanol	Alcohol	C9H12O	122-97-4	0.0427178	0.0398325	0.0390672	0.0360511	0.0414807	0.0336361	0.228214	0.261613	0.220138	0.228164	0.273826	0.208796	0.331481	0.293728	0.289153	0.281643	0.303965	0.266661	0.026506	0.0240619	0.0243558	0.0253804	0.0314828	0.0343433	0.106979	0.112485	0.113441
KMW0163	3-Thiophenethiol	Heterocyclic compound	C4H4S2	7774-73-4	0.0502179	0.0508361	0.0552226	0.0515339	0.0520498	0.0478809	0.191592	0.2021	0.174591	0.198913	0.232695	0.183809	0.220145	0.200269	0.191116	0.187343	0.207357	0.185262	0.0394045	0.0347813	0.036028	0.0259189	0.0331578	0.0356376	0.100946	0.104781	0.104288
XMW1290	3-n-Propyl-2-pyrazolin-5-one	Heterocyclic compound	C6H10N2O	29211-70-9	0.0732482	0.0698403	0.070584	0.0679479	0.0700686	0.0641627	0.121771	0.142636	0.117792	0.12304	0.16271	0.120663	0.137191	0.12156	0.116587	0.116351	0.128136	0.113785	0.0612389	0.0601422	0.0554007	0.0561699	0.0568818	0.0644603	0.0861781	0.0976527	0.091577
D311	3-p-Menthen-7-al	Aldehyde	C10H16O	27841-22-1	0.386577	0.365606	0.388662	0.319582	0.371998	0.301175	1.03162	1.19855	0.954834	0.974808	1.03899	0.0734907	1.03784	0.893403	0.780867	0.842366	1.04555	0.810886	0.16769	0.167146	0.139023	0.146988	0.1604	0.206402	0.704661	0.719773	0.533373
XMW0795	3H-Indazol-3-one, 1-ethyl-1,2-dihydro-	Heterocyclic compound	C9H10N2O	54385-62-5	9.65791	8.77811	9.42463	8.63269	9.05169	8.15035	8.03559	22.3887	18.0582	19.8579	25.4227	17.2207	20.7633	18.6875	17.8276	16.9297	20.2536	16.2391	1.794	1.72301	1.62697	1.62954	1.61059	1.82234	12.0623	13.5758	12.2142
XMW1161	4',6'-Dihydroxy-2',3'-dimethylacetophenone	Ketone	C10H12O3	7743-14-8	0.174165	0.167184	0.16872	0.165271	0.167693	0.156525	0.175177	0.203608	0.172753	0.184825	0.242197	1.4633	1.1261	1.20741	1.17011	1.04128	0.230468	1.13886	0.195548	0.18781	0.177341	0.177621	0.175555	0.198636	0.719649	1.10697	1.1455
XMW1378	4,6-Octadiyn-3-one, 2-methyl-	Ketone	C9H10O	29743-33-7	7.6759	7.56686	7.80494	7.58023	7.45236	7.00865	72.9655	76.4386	71.3166	72.779	86.2966	16.6151	47.0021	42.8868	38.4336	39.2476	64.594	37.4078	3.45338	3.17777	3.16088	3.11643	3.34855	3.28279	7.87881	7.50804	8.6748
w04	4,8,12-Tetradecatrienal, 5,9,13-trimethyl-	Heterocyclic compound	C17H28O	66408-55-7	0.0368404	0.0252746	0.0290143	0.01942	0.0299364	0.0195227	0.0487958	0.0903562	0.0540624	0.0531109	0.0891013	0.0355026	0.051214	0.0499842	0.0500833	0.0435517	0.0684333	0.0410144	0.0119971	0.0152607	0.00937778	0.00861512	0.0066105	0.0285747	0.0199732	0.0247734	0.0228544
KMW0452*080	4-(1-methylethyl)-Benzaldehyde	Terpenoids	C10H12O	122-03-2	0.0308848	0.0299315	0.0326558	0.0284833	0.0289722	0.0269954	0.126192	0.13992	0.119514	0.123657	0.152627	0.120895	0.192268	0.166634	0.164522	0.162899	0.181983	0.158773	0.0110819	0.0101065	0.00959327	0.00943498	0.0101693	0.0110846	0.0680123	0.0789427	0.07603
XMW0440	4-(Aminomethyl)pyridine	Heterocyclic compound	C6H8N2	3731-53-1	0.073874	0.0797435	0.0861858	0.0653758	0.0825471	0.0657393	0.125216	0.185694	0.124211	0.125863	0.206267	0.146557	0.0973782	0.0878725	0.0860327	0.0856205	0.103539	0.0809858	0.0610081	0.052007	0.0490714	0.0518497	0.0476054	0.0588339	0.0806044	0.103999	0.0910921
NMW0406	4-(N-Nitroso-N-methylamino)-1-(3-pyridyl)-1-butanone	Heterocyclic compound	C10H13N3O2	64091-91-4	0.0499715	0.0640248	0.0746405	0.0602554	0.0584944	0.0669106	0.0321043	0.0725892	0.0462497	0.0325397	0.0440036	0.0431663	0.0535161	0.067215	0.0677042	0.0552262	0.0718246	0.0488489	0.032993	0.071628	0.0415112	0.0856767	0.034944	0.0694503	0.0458001	0.0490778	0.0644323
XMW1144	4-Acetoxy-3-methoxystyrene	Aromatics	C11H12O3	46316-15-8	0.0130455	0.00980989	0.0131351	0.0390267	0.0111199	0.00969699	0.0350941	0.0424843	0.032794	0.0377338	0.0517212	0.0264467	0.0974923	0.0861334	0.0933562	0.07733	0.0918573	0.0730418	0.0301451	0.0269011	0.0259824	0.026338	0.0284775	0.035254	0.0459487	0.0518842	0.0461692
D74	4-Acetylanisole	Ketone	C9H10O2	100-06-1	0.0089798	0.00909192	0.0104013	0.00950195	0.00911962	0.00825281	0.00681699	0.000721575	0.00600131	0.0066809	0.000858333	0.00661157	0.0201869	0.0179222	0.0169979	0.0159866	0.0198203	0.0166973	0.00485589	0.00403607	0.00314243	0.00387165	0.0037307	0.0048198	0.00643611	0.00919828	0.00734992
D185	4-Aminobenzoic acid	Acid	C7H7NO2	150-13-0	7.32991	5.94945	5.84725	6.05425	7.83341	5.88128	8.55901	8.45667	8.12026	9.37041	8.78453	7.11913	6.43898	5.72931	5.58446	4.70642	5.56979	4.37598	5.60714	5.68699	5.45662	5.0208	4.88892	5.57643	5.19435	7.04858	6.55836
NMW0059	4-Aminopyridine	Heterocyclic compound	C5H6N2	504-24-5	0.0289715	0.0185289	0.0175483	0.0147156	0.0192772	0.0212302	0.0453852	0.0502963	0.0575309	0.0430944	0.0452624	0.0262689	0.00373196	0.00330723	0.0343435	0.0032368	0.00388917	0.0350246	0.0164995	0.0269713	0.0212614	0.0221401	0.0197696	0.0365894	0.0182782	0.0168202	0.0237621
XMW0089	4-Decenal, (E)-	Aldehyde	C10H18O	65405-70-1	0.704027	0.755465	0.831408	0.613349	0.787319	0.616456	1.38935	1.865	0.0939626	0.100529	1.56485	1.56367	0.120288	0.642737	0.605638	0.104328	0.749854	0.104874	0.629264	0.543478	0.504312	0.539168	0.477435	0.62509	0.710589	0.959819	0.916839
WMW0181	4-Decenoic acid, methyl ester, Z-	Ester	C11H20O2	7367-83-1	0.665196	0.640387	0.703976	0.624805	0.641963	0.549361	2.11023	2.40186	1.9773	2.21775	2.81509	2.18091	2.70823	2.34154	3.4177	2.22353	2.83143	2.64434	0.209422	0.192779	0.185393	0.188654	0.201272	0.212861	1.31038	1.56302	1.41377
D133	4-Heptanol, 2,6-dimethyl-, acetate	Ester	C11H22O2	10250-45-0	0.397772	0.356108	0.334003	0.310422	0.331386	0.307168	0.0641821	0.0739797	0.065216	0.0641903	0.0150401	0.057426	0.101632	0.0899944	0.0934347	0.0979788	0.0872749	0.0941126	0.198166	0.188426	0.185097	0.178992	0.183166	0.200152	0.605713	0.619759	0.523143
XMW0290	4-Heptanone, oxime	Amine	C7H15NO	1188-63-2	0.0150039	0.0154148	0.0165336	0.0155129	0.0152728	0.0139427	0.00210008	0.00244092	0.00207102	0.00221575	0.00290354	0.00221726	0.00265125	0.00234951	0.00229996	0.00229947	0.00276292	0.00231151	0.0121822	0.0112576	0.010785	0.0112773	0.0112044	0.0121119	0.0329721	0.0391274	0.0371642
KMW0123	4-Heptenal, (Z)-	Aldehyde	C7H12O	6728-31-0	0.0313233	0.0204922	0.0208214	0.0165566	0.0208215	0.0220681	0.0422237	0.0456637	0.0542604	0.037477	0.0405328	0.0271315	0.0313549	0.0292145	0.0301381	0.024914	0.0381436	0.0283604	0.0157794	0.0167999	0.0162487	0.0141836	0.0153068	0.0238593	0.0221489	0.0193612	0.0201384
KMW0374	4-Hexen-1-ol, 5-methyl-2-(1-methylethenyl)-, (R)-	Terpenoids	C10H18O	498-16-8	0.0172446	0.0163149	0.0291363	0.0138381	0.01556	0.0170413	0.0968888	0.101525	0.0961912	0.0955427	0.129684	0.104176	0.1069	0.0948658	0.0958029	0.0964544	0.111698	0.0884966	0.0393727	0.0435259	0.0442009	0.0483254	0.0343496	0.0455505	0.0388279	0.0464003	0.0496817
XMW0434	4-Hexen-1-ol, acetate	Alcohol	C8H14O2	72237-36-6	0.215599	0.211532	0.24206	0.211049	0.20987	0.198612	1.23249	1.23214	1.13309	1.25801	1.40944	1.12969	1.69508	1.50536	1.45437	1.42294	1.54017	1.39215	0.148825	0.137696	0.141115	0.142563	0.1502	0.143068	0.41627	0.563599	0.475169
XMW0898	4-Isobutylpyrimidine	Heterocyclic compound	C8H12N2	98489-37-3	0.374231	0.362355	0.463424	0.369607	0.358431	0.322346	0.975293	1.02175	0.90023	0.999408	1.0903	0.951472	0.822672	0.745412	0.698787	0.694944	0.74646	0.710891	0.158246	0.158369	0.149431	0.151951	0.170281	0.168545	0.491356	0.474187	0.471166
KMW0337	4-Isopropyl-1-methylcyclohex-2-enol	Terpenoids	C10H18O	619-62-5	0.551625	0.575493	0.614372	0.538945	0.686969	0.538546	1.14105	1.3184	1.1258	1.13537	1.45235	1.04372	0.719061	0.652496	0.611516	0.623326	0.733397	0.587113	0.505251	0.425174	0.399685	0.430035	0.375052	0.512543	0.540952	0.810232	0.742436
KMW0473	4-Isopropylcyclohexa-1,3-dienecarbAldehyde	Aldehyde	C10H14O	1197-15-5	4.91499	4.80843	5.04672	4.6505	4.75863	4.25654	16.2288	18.518	15.7371	16.1861	20.6886	15.8926	16.1536	14.261	13.7678	13.6043	15.8215	13.3643	3.93626	3.75822	3.60114	3.84714	3.91327	4.26886	8.46893	10.15	9.41763
NMW0243*125	4-MethoxycinnamAldehyde	Aldehyde	C10H10O2	1963-36-6	0.0168057	0.0142906	0.0152263	0.0134059	0.013564	0.0141378	0.0281933	0.029158	0.0291928	0.0277477	0.0318925	0.0227306	0.0316155	0.0291141	0.0265619	0.0275768	0.0324776	0.0268277	0.0113808	0.0119823	0.011719	0.0115494	0.0105969	0.0102444	0.0159769	0.0150178	0.0150796
XMW0952	4-Methylhexyl 3-methylbutanoate	Ester	C12H24O2	1215127-80-2	0.077226	0.0726759	0.0808506	0.0754399	0.0737337	0.0687693	0.380304	0.428625	0.363921	0.379708	0.482634	0.378069	0.467903	0.406138	0.401011	0.397024	0.317846	0.393034	0.0170012	0.0163285	0.0154183	0.0154426	0.015263	0.0172697	0.131308	0.219154	0.180435
D411	4-Methylpentyl 2-methylbutanoate	Ester	C11H22O2	35852-40-5	0.0443984	0.0424183	0.0436109	0.034702	0.042934	0.035866	0.204907	0.227785	0.206702	0.198982	0.257577	0.167237	0.147178	0.132096	0.116803	0.121509	0.176612	0.112979	0.0115262	0.0106372	0.010227	0.0106408	0.00911213	0.0109012	0.102002	0.102359	0.109242
XMW0942	4-Nitro-1,3-phenylenediAmine	Amine	C6H7N3O2	5131-58-8	0.0190859	0.0151404	0.0189266	0.0167616	0.0168727	0.0158849	0.011933	0.0160719	0.0116203	0.0122802	0.0157882	0.0131936	0.0756637	0.0704538	0.0713233	0.0659441	0.0862827	0.0656168	0.0160503	0.0176027	0.0134534	0.0151726	0.0135305	0.0211332	0.0245648	0.0276294	0.0281251
XMW0574	4-Penten-1-ol, propanoate	Ester	C8H14O2	30563-30-5	1.00853	1.02433	1.10912	1.03003	1.04036	0.959178	3.01916	3.35935	2.87058	3.38489	3.87387	2.9971	3.7341	3.41548	3.25978	3.1735	3.44761	3.16333	0.628274	0.589315	0.576782	0.62714	0.58755	0.594523	1.55423	1.95946	1.96191
D245	4-Phenyl-2-butanol	Alcohol	C10H14O	2344-70-9	0.0228695	0.0212281	0.0247919	0.0262217	0.0268113	0.0239411	0.088528	0.098469	0.085147	0.0857586	0.106868	0.0820757	0.133123	0.113798	0.111907	0.112186	0.124446	0.109377	0.00703843	0.00655996	0.00624261	0.00639164	0.006074	0.00693617	0.0521566	0.0492949	0.046506
NMW0792	4-Pyridinecarbonitrile	Heterocyclic compound	C6H4N2	100-48-1	0.136194	0.139333	0.150158	0.141517	0.141632	0.131756	0.499102	0.541577	0.467596	0.519638	0.621469	0.492813	0.568515	0.540199	0.496799	0.482338	0.559649	0.500542	0.107148	0.0974209	0.0992701	0.0996284	0.10381	0.0991342	0.247472	0.288534	0.28089
XMW0051	4-Pyridinecarboxaldehyde	Heterocyclic compound	C6H5NO	872-85-5	2.80043	2.82866	2.61324	2.49556	2.87578	2.34166	8.98315	9.88851	8.5813	9.27712	11.3979	8.9491	10.0834	9.00839	8.86221	8.60539	10.0772	8.47512	2.13946	1.94973	2.00307	1.40964	1.48919	1.99809	4.97917	5.77089	5.65357
XMW0023	4-methyl-1-(1-methylethyl)-Bicyclo[3.1.0]hex-2-ene	Hydrocarbons	C10H16	28634-89-1	7.52684	9.45077	10.2986	9.5681	9.71485	7.27153	28.9351	31.5894	27.1832	30.3564	36.3368	28.641	32.3352	29.5117	28.2243	27.3063	32.4417	27.4129	6.02423	5.43359	5.55618	5.52691	5.81836	5.50781	16.1316	18.5214	17.8193
D358	4-tert-Butylcyclohexyl acetate	Ester	C12H22O2	32210-23-4	0.00667593	0.00640832	0.00646721	0.006335	0.00642784	0.00599977	0.0453469	0.0519944	0.0449665	0.0459449	0.0482343	0.0383252	0.0459621	0.0421917	0.0409232	0.0419367	0.0506696	0.0432755	0.0374777	0.0444729	0.0350953	0.0385005	0.0393839	0.0499211	0.0324372	0.0369418	0.0429644
D375	4H-Inden-4-one, 1,2,3,5,6,7-hexahydro-1,1,2,3,3-pentamethyl-	Ketone	C14H22O	33704-61-9	0.463349	0.561675	0.489301	0.487649	0.458062	0.417469	0.0729175	0.0847517	0.0719084	0.0769336	0.100815	0.0769861	0.0920545	0.0815778	0.0798576	0.0798406	0.0959322	0.0802583	0.438114	0.471635	0.392747	0.411354	0.383405	0.493177	0.382549	0.415889	0.384616
WMW0226	4H-Pyran-4-one	Heterocyclic compound	C5H4O2	108-97-4	0.0960766	0.0967706	0.106011	0.0640451	0.0995212	0.0908033	0.293685	0.324353	0.278629	0.306551	0.371486	0.292977	0.332147	0.301236	0.292816	0.283542	0.35842	0.282052	0.0523741	0.0586778	0.0476957	0.0614512	0.0514276	0.0597257	0.164849	0.19102	0.187111
XMW0854	4a(2H)-Naphthalenol, 1,3,4,5,6,8a-hexahydro-4,7-dimethyl-1-(1-methylethyl)-, (1S,4S,4aS,8aR)-	Terpenoids	C15H26O	73365-77-2	0.00211303	0.00202833	0.00204697	0.00200512	0.0020345	0.00189901	0.0021253	0.00247023	0.00209589	0.0148197	0.00293841	0.0201523	0.0152471	0.0156724	0.0139189	0.0134605	0.015777	0.0136697	0.00237245	0.00227857	0.00215156	0.00215496	0.00212989	0.00240992	0.0104084	0.0120195	0.0112103
XMW1481	5'-Hydroxy-2',3',4'-trimethylacetophenone	Ketone	C11H14O2	13667-28-2	0.0364325	0.0273616	0.0272042	0.0243253	0.0283587	0.0274706	0.0798478	0.0957713	0.0889227	0.0776298	0.103055	0.062834	0.0552965	0.0486237	0.0472391	0.0480796	0.0660541	0.047314	0.0223548	0.0234604	0.0182057	0.0193792	0.0178897	0.0290938	0.0265802	0.0314196	0.0308727
NMW0230	5,6-Dihydro-5-methyluracil	Heterocyclic compound	C5H8N2O2	696-04-8	0.167955	0.0938574	0.140535	0.0825853	0.1601	0.150137	0.073272	0.186321	0.0963413	0.16793	0.134854	0.160285	0.116971	0.0943891	0.0927222	0.0711487	0.0849186	0.0634131	0.0399594	0.0370722	0.0376259	0.0363807	0.0358299	0.0390041	0.117783	0.0969616	0.0936331
XMW0361	5,7-Octadien-4-one, 2,6-dimethyl-, (E)-	Terpenoids	C10H16O	6752-80-3	0.0716351	0.0540889	0.0542605	0.042414	0.0527197	0.0492339	0.271299	0.291097	0.271009	0.241189	0.265651	0.147357	0.312305	0.262446	0.255006	0.267013	0.353734	0.253377	0.0187522	0.0208235	0.0136618	0.0148307	0.0171049	0.0258097	0.0988518	0.100385	0.0823904
D412	5,7-Octadien-4-one, 2,6-dimethyl-, (Z)-	Terpenoids	C10H16O	3588-18-9	0.265355	0.21686	0.212472	0.172082	0.210287	0.18855	1.08	1.17796	1.09626	0.964378	1.06682	0.613395	0.994915	0.862076	0.787423	0.838711	1.12243	0.779586	0.0691653	0.0742493	0.0549756	0.0579086	0.0624806	0.0951218	0.442428	0.442286	0.357391
XMW0456	5,8-Decadien-2-one, 5,9-dimethyl-, (E)-	Ketone	C12H20O	130876-99-2	0.418174	0.365425	0.443306	0.40425	0.405477	0.368797	1.5472	1.74547	1.45957	1.593	2.04397	1.57318	1.92666	1.70778	1.64272	1.61615	1.89925	1.63106	0.123078	0.108626	0.103685	0.109112	0.117185	0.122618	0.89125	0.81035	0.971994
WMW0095	5,9-Undecadien-2-ol, 6,10-dimethyl-	Alcohol	C13H24O	53837-34-6	0.686359	0.488348	0.686074	0.494133	0.517857	0.474893	1.30724	1.60309	1.22969	1.43085	1.76457	0.956275	1.38741	1.23452	1.22152	1.55566	1.81565	1.43166	0.363928	0.324517	0.308452	0.332301	0.339276	0.373909	0.899966	0.85352	0.776912
WMW0089*085	5,9-Undecadien-2-one, 6,10-dimethyl-	Terpenoids	C13H22O	689-67-8	7.52733	7.54974	7.37955	7.55679	8.13427	7.30621	17.1528	25.3568	16.1069	22.6285	22.5539	16.9045	30.2312	26.7498	25.7618	24.1362	28.8677	23.2279	6.06763	5.61665	5.3258	5.43968	5.65815	6.21037	10.9335	13.1388	12.2079
KMW0563*085	5,9-Undecadien-2-one, 6,10-dimethyl-, (E)-	Ketone	C13H22O	3796-70-1	7.52733	7.54974	7.37955	7.55679	8.13427	7.30621	17.1528	25.3568	16.1069	22.6285	22.5539	16.9045	30.2312	26.7498	25.7618	24.1362	28.8677	23.2279	6.06763	5.61665	5.3258	5.43968	5.65815	6.21037	10.9335	13.1388	12.2079
D430	5-Acetyl-2,4-dimethylthiazole	Heterocyclic compound	C7H9NOS	38205-60-6	0.0090862	0.00806413	0.00854421	0.00574939	0.00537383	0.00781523	0.0207017	0.0211884	0.0197704	0.0209037	0.0247824	0.0148083	0.0387024	0.0343336	0.0324237	0.0304475	0.0378761	0.0291686	0.0122059	0.0115442	0.0109077	0.0108707	0.0108798	0.0135633	0.0163308	0.0173975	0.0167288
XMW1455	5-Amino-2-methoxyphenol	Phenol	C7H9NO2	1687-53-2	0.231373	0.143003	0.174301	0.131326	0.14951	0.130943	0.155103	0.18974	0.169152	0.170606	0.17889	0.131851	0.128042	0.118565	0.116993	0.099838	0.121254	0.108217	0.0203568	0.0195513	0.0184614	0.0184906	0.0182756	0.0206783	0.136063	0.150805	0.118167
D434	5-Decen-1-ol, acetate, (E)-	Ester	C12H22O2	38421-90-8	0.250138	0.180724	0.151938	0.165576	0.193157	0.175255	0.228386	0.265933	0.232857	0.176413	0.259613	0.181876	0.141345	0.124347	0.123858	0.145722	0.10736	0.116458	0.0182187	0.0174977	0.0165224	0.0165485	0.016356	0.0185064	0.148718	0.162759	0.132135
WMW0115	5-Ethylhydantoin	Heterocyclic compound	C5H8N2O2	15414-82-1	0.0732975	0.0706981	0.100841	0.0658892	0.0696305	0.0666165	0.165301	0.140665	0.120879	0.162038	0.171893	0.114817	0.0166048	0.014715	0.0144047	0.0144016	0.0173042	0.014477	0.0844996	0.0764855	0.0665764	0.0776347	0.0685706	0.0849403	0.0695754	0.09609	0.0898036
WMW0058	5-Hepten-2-ol, 6-methyl-	Alcohol	C8H16O	1569-60-4	0.10544	0.10728	0.114849	0.11754	0.106858	0.109417	0.440718	0.448137	0.393166	0.461457	0.509476	0.312886	0.476127	0.430556	0.406507	0.397448	0.35158	0.397858	0.0625507	0.0719761	0.0753498	0.0767533	0.0812666	0.0708162	0.161718	0.200732	0.205451
KMW0176	5-Hepten-2-one, 6-methyl-	Ketone	C8H14O	110-93-0	0.141262	0.218555	0.236997	0.228589	0.101244	0.0908918	0.0879211	0.0909594	0.115011	0.0899824	0.0136149	0.0103969	0.0124319	0.011017	0.0107847	0.0107824	0.0129555	0.0108388	0.135635	0.150841	0.143624	0.146802	0.149543	0.0935151	0.0541963	0.0526281	0.051942
KMW0729	5-Hydroxymethylfurfural	Aldehyde	C6H6O3	67-47-0	0.402473	0.382215	0.362541	0.35686	0.367752	0.333693	0.275258	0.310004	0.264342	0.231345	0.292196	0.225742	0.272222	0.231185	0.217908	0.276593	0.218523	0.213101	0.372789	0.368874	0.333509	0.352251	0.334133	0.392919	0.225845	0.379915	0.333082
XMW0585	5-Isoxazolecarboxylic acid, 4,5-dihydro-5-methyl-, methyl ester, (R)-	Heterocyclic compound	C6H9NO3	64018-42-4	0.577813	0.451434	0.46778	0.393287	0.46919	0.454671	0.491298	0.49666	0.559569	0.46749	0.48788	0.263108	0.343013	0.300135	0.289894	0.305161	0.407498	0.301975	0.298491	0.311541	0.265051	0.272304	0.26174	0.399985	0.246497	0.204426	0.209284
KMW0308	5-Methyl-2-thiophenecarboxaldehyde	Heterocyclic compound	C6H6OS	13679-70-4	0.0549623	0.0562792	0.0612574	0.0464759	0.0589391	0.0466328	0.10098	0.11784	0.101565	0.102249	0.129468	0.0926198	0.0736142	0.0651012	0.0557009	0.056129	0.0639349	0.0531441	0.0416091	0.0363682	0.0337735	0.0362845	0.0322792	0.0442612	0.0531371	0.0696049	0.0638335
KMW0431	5H-5-Methyl-6,7-dihydrocyclopentapyrazine	Heterocyclic compound	C8H10N2	23747-48-0	1.25728	1.01264	1.04666	0.875891	1.01112	0.944869	4.30064	4.74633	5.60707	4.17137	5.25344	3.24423	6.44094	5.81905	4.91114	5.09134	6.83526	4.81652	0.494856	0.461464	0.454987	0.44257	0.462397	0.523796	2.38895	2.21935	2.21355
XMW0790	6,7-Dimethyl-1,2,3,5,8,8a-hexahydronaphthalene	Aromatics	C12H18	107914-92-1	0.0391605	0.0363783	0.0409396	0.0357965	0.0386514	0.0397465	0.00639143	0.00742873	0.00630298	0.00674346	0.00883669	0.00674805	0.346347	0.305992	0.29436	0.293732	0.330819	0.290775	0.0377268	0.0342617	0.0411048	0.0352119	0.0357529	0.0368969	0.0948723	0.110613	0.1064
w40	6,7-Dodecanedione	Ketone	C12H22O2	13757-90-9	0.0339216	0.0221497	0.0279658	0.0919853	0.0319957	0.0295528	0.0182894	0.0282495	0.0174873	0.0194997	0.0234347	0.0244453	0.0238719	0.0229354	0.0223414	0.021461	0.0270518	0.0258259	0.0784875	0.0248292	0.0834259	0.0852558	0.0360207	0.040971	0.0982666	0.117991	0.0950246
XMW0423	6,8-Nonadien-2-one, 8-methyl-5-(1-methylethyl)-, (E)-	Ketone	C13H22O	54868-48-3	0.345458	0.302299	0.351529	0.356047	0.38402	0.347014	1.20003	1.38533	1.12415	1.24408	1.55452	1.00513	1.80559	1.58979	1.53297	1.43199	1.71831	1.33766	0.403839	0.369666	0.350386	0.339648	0.33783	0.415975	0.598718	0.794465	0.706704
XMW0133	6-Methyl-6-(5-methylfuran-2-yl)heptan-2-one	Heterocyclic compound	C13H20O2	50464-95-4	0.145881	0.126692	0.137082	0.131348	0.1308	0.121242	0.317943	0.355827	0.304425	0.2701	0.4127	0.199163	0.212457	0.187117	0.185006	0.173692	0.209834	0.188195	0.0895658	0.0839321	0.0797496	0.0799636	0.0806552	0.0951631	0.120955	0.217862	0.193826
WMW0048	6-Nonenal, (E)-	Aldehyde	C9H16O	2277-20-5	0.107348	0.117578	0.126361	0.0847496	0.1206	0.0805459	0.207034	0.256816	0.198644	0.206821	0.289122	0.213163	0.1405	0.126297	0.121605	0.121358	0.148169	0.115732	0.0779986	0.0642827	0.0606107	0.0645819	0.0587119	0.0880087	0.0900748	0.123103	0.113062
WMW0057	6-Nonenal, (Z)-	Aldehyde	C9H16O	2277-19-2	1.53344	1.42328	1.56567	1.33574	1.47845	1.34153	7.54312	7.72625	6.88959	10.7003	8.352	6.33453	18.4475	9.11136	6.57121	6.44599	10.1036	6.27738	1.46306	1.40321	1.32194	1.3423	1.34559	1.50469	0.875379	1.31197	0.989751
KMW0515	6-Octen-1-ol, 3,7-dimethyl-, acetate	Ester	C12H22O2	150-84-5	0.026115	0.0235167	0.0270783	0.0237723	0.0252357	0.019941	0.0625539	0.0946698	0.0584916	0.0698483	0.089218	0.0582453	0.0426004	0.0381817	0.0357112	0.0343145	0.044636	0.0372612	0.0107272	0.0103466	0.0074444	0.00671526	0.00948735	0.0146936	0.0253184	0.0306258	0.0245819
NMW0113	6-Octen-1-ol, 3,7-dimethyl-, formate	Terpenoids	C11H20O2	105-85-1	0.241757	0.247534	0.276408	0.239991	0.243505	0.221444	0.617291	0.681041	0.593932	0.59591	0.732647	0.586192	0.924905	0.794856	0.786655	0.78463	0.856385	0.761762	0.0765242	0.0643654	0.0693751	0.0647441	0.0746005	0.0709594	0.38	0.306049	0.288773
XMW1138	6-Octen-1-ol, 7-methyl-3-methylene-	Terpenoids	C10H18O	13066-51-8	1.15733	1.10421	1.06973	1.04924	1.09275	0.970481	0.716985	0.803198	0.663856	0.659822	0.925658	0.710179	0.785749	0.680951	0.638509	0.673845	0.667108	0.638	0.917284	0.85526	0.789506	0.801498	0.998657	0.953151	0.831618	0.963704	0.858061
NMW0055	6-Octenal, 3,7-dimethyl-, (R)-	Terpenoids	C10H18O	2385-77-5	0.223885	0.232292	0.249149	0.186203	0.243772	0.202262	0.543831	0.709201	0.551127	0.552191	0.861086	0.607231	0.515757	0.467282	0.44827	0.454749	0.561164	0.428319	0.228924	0.186662	0.180364	0.192258	0.159633	0.222958	0.268119	0.356212	0.357367
XMW0425	6-Quinolinamine, 2-methyl-	Heterocyclic compound	C10H10N2	65079-19-8	0.0681711	0.0566269	0.0620019	0.0590022	0.0561151	0.0525733	0.0477705	0.0413657	0.0470561	0.0484688	0.0638041	0.0449529	0.045528	0.041598	0.0380719	0.0382347	0.0467914	0.0366625	0.0449073	0.0433911	0.0356621	0.0413853	0.039547	0.0508341	0.0625758	0.0562806	0.0455942
XMW1130	6-bromo-2-Hexanone	Ketone	C6H11BrO	10226-29-6	0.0362558	0.0326721	0.00580134	0.0340897	0.0345053	0.0319732	0.00120467	0.00140018	0.001188	0.00127102	0.00166556	0.00127189	0.00152083	0.00134775	0.00131933	0.00131905	0.0015849	0.00132595	0.0362686	0.0356729	0.033028	0.0344852	0.0348681	0.0379361	0.0399322	0.0464423	0.0437413
XMW1322	7(1H)-Pteridinone	Heterocyclic compound	C6H4N4O	2432-27-1	0.0549906	0.0462681	0.0444156	0.0340424	0.0539384	0.052687	0.0930872	0.0932952	0.0901543	0.0828085	0.110132	0.058431	0.0553766	0.056656	0.0558711	0.0437812	0.060182	0.0449878	0.0229379	0.0236057	0.0212132	0.0207014	0.0266588	0.0219467	0.0342155	0.0410345	0.0375703
XMW0866	7-(2-Hydroxypropan-2-yl)-1,4a-dimethyldecahydronaphthalen-1-ol	Terpenoids	C15H28O2	92857-25-5	0.019551	0.0139664	0.0148752	0.0102568	0.00781947	0.0120136	0.0148875	0.0311927	0.018169	0.0164727	0.0383484	0.0183159	0.0227023	0.0189107	0.0189902	0.0173896	0.0280794	0.0152815	0.00996206	0.00808575	0.00674864	0.00739829	0.00424905	0.0170798	0.00997517	0.0118531	0.0094328
XMW0863*075	7-Acetyl-2-hydroxy-2-methyl-5-isopropylbicyclo[4.3.0]nonane	Terpenoids	C15H26O2	96093-81-1	0.000264904	0.000254285	0.00128311	0.000251376	0.00025506	0.000238074	0.00925905	0.0122487	0.00856319	0.00949832	0.0118937	0.00956212	0.0426296	0.0413601	0.0361091	0.0373493	0.0446783	0.0346978	0.00201162	0.00198454	0.00158041	0.00171496	0.00155455	0.00175855	0.0109246	0.0122801	0.0120821
KMW0250	7-Octen-2-ol, 2,6-dimethyl-	Terpenoids	C10H20O	18479-58-8	0.241675	0.231987	0.234119	0.229333	0.232694	0.217198	2.3363	2.65085	2.25236	2.4068	2.95781	2.31643	2.46724	2.19609	2.11416	2.07286	2.33398	2.04733	0.271346	0.260609	0.246082	0.246471	0.243604	0.275631	1.06383	1.37108	1.28216
XMW1083	7-Octene-2,6-diol, 2,6-dimethyl-	Alcohol	C10H20O2	29210-77-3	0.0877757	0.0803261	0.0766311	0.0777385	0.079889	0.0736925	0.0688047	0.0827477	0.0666344	0.0704394	0.0859534	0.0659134	0.0522007	0.0450836	0.0410433	0.0438234	0.0658958	0.0656149	0.0804036	0.079782	0.0741735	0.0766153	0.0739924	0.0864083	0.0706218	0.0806427	0.0774713
KMW0209*089	7-Oxabicyclo[2.2.1]heptane, 1-methyl-4-(1-methylethyl)-	Terpenoids	C10H18O	470-67-7	0.000135551	0.000130117	0.000984825	0.000765494	0.0011494	0.000885192	0.0200391	0.0212461	0.0196872	0.0195296	0.023295	0.0174284	0.0387798	0.0318959	0.0289232	0.0295974	0.0319552	0.0292941	0.000152193	0.000783197	0.000690112	0.000714295	0.000744555	0.000154596	0.00904718	0.0129396	0.0091732
KMW0319*031	7-Oxabicyclo[4.1.0]heptane, 1-methyl-4-(1-methylethenyl)-	Terpenoids	C10H16O	1195-92-2	0.0247457	0.0252862	0.0279773	0.0375795	0.0259401	0.02833	0.111553	0.129391	0.108967	0.109985	0.143792	0.107607	0.114404	0.102915	0.0925338	0.0953962	0.112796	0.0914783	0.0275099	0.0238302	0.0248743	0.0248073	0.0231202	0.0279658	0.0640434	0.0730521	0.0760986
XMW0931	8,9-Dehydrothymol	Phenol	C10H12O	18612-99-2	0.00867647	0.00718399	0.0079148	0.00687573	0.00752429	0.00675063	0.0208991	0.0229891	0.0220845	0.0211334	0.0281216	0.019781	0.034836	0.0327959	0.0302147	0.0297997	0.0359214	0.0343388	0.00671014	0.0059788	0.00553541	0.00553095	0.00608804	0.00650556	0.013224	0.012137	0.0125674
D432	8-Dodecen-1-ol, acetate, (E)-	Ester	C14H26O2	38363-29-0	0.264019	0.17916	0.203977	0.153267	0.224214	0.21412	0.645815	0.714943	0.706007	0.61555	0.827456	0.385115	0.344048	0.303059	0.299828	0.364734	0.438373	0.338054	0.199301	0.202325	0.117081	0.167565	0.147466	0.2525	0.186698	0.189706	0.262511
XMW0749	8-Hexadecyne	Hydrocarbons	C16H30	19781-86-3	0.0429634	0.0366378	0.0421974	0.040161	0.0400587	0.0381815	0.0591821	0.0784616	0.0581738	0.0625331	0.0839352	0.0670364	0.0488945	0.0443147	0.0452732	0.0404965	0.0550708	0.0401251	0.0216164	0.0214095	0.0199218	0.0189029	0.0163376	0.0246461	0.0312688	0.0380064	0.0402476
XMW0865	8-Isopropyl-1-methyltricyclo[4.4.0.02,7]dec-3-ene-3-carbAldehyde	Aldehyde	C15H22O	41610-68-8	0.0163078	0.0127917	0.0157055	0.0131422	0.0136932	0.0129627	0.00040412	0.00975683	0.000398527	0.0260465	0.0288543	0.0726249	0.0671675	0.070271	0.0684551	0.0636323	0.058273	0.0658254	0.00350339	0.00331891	0.00242723	0.00346593	0.00202496	0.00421212	0.0318069	0.0474971	0.043505
KMW0078	8-Nonen-2-one	Ketone	C9H16O	5009-32-5	0.462492	0.435147	0.451904	0.412482	0.437	0.419635	2.73445	2.77882	2.53153	2.83086	0.0881329	0.0673018	0.0804748	0.071316	0.0698122	0.0697973	0.0838647	0.0701625	0.438101	0.411958	0.390445	0.394645	0.404681	0.444151	0.297862	0.433164	0.336234
D396	9-Dodecen-1-ol, acetate, (E)-	Ester	C14H26O2	35148-19-7	0.0194423	0.0144095	0.0142852	0.0134848	0.0150899	0.0148227	0.0224189	0.0315666	0.0216144	0.0250474	0.0255154	0.0199665	0.0175022	0.0169977	0.0169462	0.0140127	0.0179036	0.0140651	0.00324894	0.00338509	0.00243207	0.00299096	0.00313032	0.00428715	0.0125523	0.0174466	0.0147977
D242	9-Tetradecen-1-ol, acetate, (E)-	Ester	C16H30O2	23192-82-7	0.0269867	0.0243036	0.0139764	0.00990308	0.0147487	0.016539	0.0442073	0.0861947	0.0513642	0.0482394	0.0835399	0.0343801	0.0232687	0.0209145	0.0224958	0.0191503	0.0524505	0.0179537	0.0123382	0.0152067	0.00745357	0.00895378	0.00466794	0.025985	0.0216626	0.0263606	0.0205926
NMW0284	9H-Xanthene	Heterocyclic compound	C13H10O	92-83-1	0.00787246	0.00760784	0.0075851	0.00672405	0.00679672	0.00656461	0.00765312	0.00590276	0.00830931	0.00497538	0.0116427	0.00765477	0.0117324	0.00835419	0.00650871	0.007407	0.00856625	0.00931466	0.00653301	0.00908984	0.00476851	0.00581329	0.00477697	0.0113029	0.00763842	0.007368	0.00590228
XMW0526	AcetAldehyde, (3,3-dimethylcyclohexylidene)-, (Z)-	Aldehyde	C10H16O	26532-24-1	0.0558634	0.0462839	0.0466424	0.0422886	0.0486424	0.0523706	0.042713	0.0481772	0.0493761	0.0439218	0.0480359	0.0259935	0.0648603	0.0459169	0.0519501	0.0572179	0.0576747	0.0588987	0.0333064	0.0315206	0.0274125	0.0283526	0.0271593	0.0397436	0.0443071	0.0499456	0.0381979
XMW0679	AcetAldehyde, tetramer	Aldehyde	C8H16O4	108-62-3	0.44909	0.404337	0.425966	0.409033	0.418673	0.486017	0.43883	0.37892	0.383786	0.432137	0.330649	0.432545	0.514954	0.345402	0.256576	0.430149	0.427729	0.259404	0.417017	0.510195	0.464495	0.478547	0.48744	0.43711	0.381854	0.457251	0.421322
NMW0225	Acetamide, N-(2-phenylethyl)-	Amine	C10H13NO	877-95-2	0.28845	0.244413	0.227251	0.238337	0.261144	0.235972	2.06284	2.3772	1.98178	2.09598	2.71464	0.531271	0.977282	0.858985	0.819115	0.952768	1.15006	1.01696	0.293775	0.22158	0.209862	0.261697	0.266014	0.302764	0.420945	0.429224	0.408348
NMW0157	Acetamide, N-phenyl-	Amine	C8H9NO	103-84-4	0.217851	0.221523	0.252849	0.212368	0.214105	0.200721	1.09023	1.25909	1.03804	1.08638	1.47331	1.07577	1.13513	1.02526	0.978664	0.981584	1.1359	0.95292	0.0796808	0.0752043	0.0707971	0.0664247	0.0688588	0.082497	0.284581	0.371352	0.365503
XMW1070	Acetic Acid, (acetyloxy)-	Acid	C4H6O4	13831-30-6	0.0109691	0.0103329	0.0111968	0.00986102	0.0102498	0.010096	0.0507051	0.0521807	0.051957	0.0508968	0.0577361	0.0315511	0.0417281	0.0381255	0.0418454	0.0431848	0.0436052	0.0386773	0.00636814	0.00594124	0.00629565	0.00621615	0.00657284	0.00659752	0.0138169	0.0107684	0.0132278
NMW0194*057	Acetic Acid, cinnamyl ester	Acid	C11H12O2	103-54-8	0.0528273	0.0389301	0.0543369	0.0383082	0.0470246	0.0371731	0.0986763	0.122202	0.0935229	0.106899	0.133555	0.105396	0.131857	0.00511435	0.11627	0.00500544	0.00601426	0.00503162	0.0273169	0.0252441	0.0231393	0.0255919	0.0262573	0.0286258	0.0651867	0.0624752	0.0567206
NMW0171	Acetic Acid, phenoxy-	Acid	C8H8O3	122-59-8	0.539951	0.411353	0.540857	0.402132	0.494045	0.389316	1.55175	1.75378	1.46243	1.59857	2.01775	1.21873	2.30999	2.04959	1.95175	1.84137	2.19741	1.73905	1.67371	1.60183	1.52412	1.50601	1.78153	1.68405	1.09131	1.26266	1.10517
XMW1258	Acetic acid, (4,6,8,9-tetramethyl-3-oxabicyclo[3.3.1]non-6-en-1-yl)methyl ester	Ester	C15H24O3	309722-81-4	0.143968	0.0611614	0.0913466	0.054973	0.102216	0.104114	0.148919	0.179946	0.221441	0.200842	0.230328	0.0966813	0.0808831	0.0747715	0.0773112	0.0722859	0.0976756	0.0726145	0.075263	0.0766586	0.0542354	0.0599275	0.058126	0.116211	0.0566643	0.0562515	0.0535087
D141	Acetic acid, 2-ethylhexyl ester	Ester	C10H20O2	103-09-3	0.0587768	0.0599365	0.0656261	0.0498325	0.0633419	0.0489156	0.107077	0.117564	0.0919881	0.10654	0.138805	0.0996926	0.0640308	0.0588241	0.0544119	0.0554012	0.0701799	0.0528618	0.0457385	0.0384026	0.0365939	0.0394973	0.0339858	0.0465262	0.0569469	0.074916	0.068011
KMW0437	Acetic acid, 2-phenylethyl ester	Ester	C10H12O2	103-45-7	0.00942504	0.00900674	0.0100776	0.00858603	0.00879947	0.00783571	0.0295637	0.0327084	0.0285445	0.0280798	0.0357823	0.0280044	0.0444752	0.0392539	0.0391347	0.0374939	0.042035	0.0382409	0.00251982	0.00230379	0.00228836	0.00218854	0.00237253	0.00239972	0.0142231	0.015829	0.0153955
KMW0546	Acetic acid, decyl ester	Ester	C12H24O2	112-17-4	0.617938	0.614734	0.652032	0.559781	0.515465	0.588901	0.580881	0.649195	0.755587	0.553691	0.637471	0.493527	0.42625	0.396784	0.387217	0.380236	0.456187	0.388341	0.0753801	0.0723972	0.0683616	0.0684697	0.0676733	0.0765705	0.379746	0.502075	0.396329
KMW0204	Acetic acid, hexyl ester	Ester	C8H16O2	142-92-7	0.304928	0.240829	0.248567	0.210606	0.25041	0.238499	0.256885	0.263077	0.289761	0.255444	0.269426	0.143612	0.191293	0.166605	0.156645	0.167595	0.221854	0.167603	0.155973	0.164316	0.140379	0.143832	0.139929	0.208874	0.133788	0.112298	0.115513
KMW0481	Acetic acid, nonyl ester	Ester	C11H22O2	143-13-5	0.40247	0.33644	0.39155	0.323764	0.365837	0.32589	0.703646	0.735948	0.651634	0.702911	0.893247	0.529668	0.776297	0.673997	0.636201	0.606828	0.766927	0.568922	0.327959	0.298668	0.290341	0.291855	0.300992	0.339146	0.44111	0.430974	0.403491
NMW0025	Acetic acid, phenyl ester	Ester	C8H8O2	122-79-2	10.2063	10.0114	10.3068	9.93393	10.0682	9.27823	1.31594	1.52951	1.29773	1.38842	1.81939	1.38936	44.2929	39.0453	37.8983	37.2488	41.9528	36.5899	7.57072	7.05418	7.16098	7.22671	7.37847	7.48489	21.0599	24.1425	23.3654
D239	Acetoacetic acid isoamyl ester	Ester	C9H16O3	2308-18-1	0.0622888	0.0592036	0.0576177	0.0565621	0.0579529	0.0524347	0.0507105	0.0592604	0.0494136	0.0492568	0.0568477	0.0431303	0.0565792	0.0512102	0.0444127	0.0463725	0.0489844	0.0449879	0.0546556	0.0527812	0.0478179	0.0480145	0.0510088	0.0561064	0.0562109	0.0621708	0.0538781
KMW0233	Acetophenone	Ketone	C8H8O	98-86-2	5.26483	5.05378	5.10023	4.99597	5.06918	4.73159	53.6207	57.4819	48.9069	54.4868	65.4305	49.5969	52.6873	46.3882	45.1163	44.4411	51.0852	43.5552	5.9112	5.6773	5.36082	5.3693	5.30685	6.00456	25.7162	28.894	27.9316
KMW0214	Acetylpyrazine	Heterocyclic compound	C6H6N2O	22047-25-2	0.410696	0.406762	0.46867	0.417471	0.417936	0.38023	1.94235	2.17264	1.81299	1.97235	2.44366	1.91108	2.7158	2.40982	2.33886	2.27704	2.66235	2.24932	0.183444	0.175164	0.182465	0.184795	0.196189	0.180079	0.856479	0.721654	0.943767
NMW0351	Acridine	Heterocyclic compound	C13H9N	260-94-6	0.0293076	0.0200721	0.0192662	0.01397	0.0202757	0.014851	0.0383761	0.0829525	0.0353057	0.0436312	0.110891	0.042249	0.0336629	0.0205601	0.0325996	0.0197767	0.0349207	0.0187232	0.0122697	0.00889774	0.00740345	0.00708721	0.00683753	0.0235432	0.024936	0.0338046	0.0245336
D316	Adamantane	Hydrocarbons	C10H16	281-23-2	0.274447	0.284266	0.304342	0.230777	0.293438	0.245955	0.0351192	0.0408189	0.0346332	0.0370535	0.0485552	0.0370787	0.0443361	0.0392902	0.0384617	0.0384535	0.0462037	0.0386547	0.21267	0.191283	0.177765	0.18731	0.200128	0.218808	0.287015	0.374952	0.319544
NMW0364	Adenine	Heterocyclic compound	C5H5N5	73-24-5	0.0269906	0.0190378	0.0212334	0.0165207	0.0210634	0.0172697	0.0412478	0.0642972	0.0437016	0.0437274	0.0640583	0.03909	0.00771105	0.0070722	0.0102207	0.00645221	0.0116212	0.00574932	0.0176	0.00580969	0.00389858	0.00446732	0.00341687	0.0219351	0.00480202	0.00675335	0.00590048
KMW0596*059	Alloaromadendrene	Terpenoids	C15H24	25246-27-9	1.2722	1.22488	3.36954	2.9451	3.08529	1.14707	3.68465	4.01576	7.39208	3.49968	10.494	4.02575	9.08528	8.12691	7.80556	7.23031	8.65567	6.8795	1.84874	1.68732	1.60256	1.66806	1.72298	1.91821	4.54169	5.01238	4.47171
NMW0389	Aminopyrine	Heterocyclic compound	C13H17N3O	58-15-1	0.00382916	0.00296374	0.00534641	0.008779	0.00310863	0.00312965	0.00208378	0.00289082	0.00217251	0.00230742	0.00257419	0.00212688	0.0127046	0.012094	0.0122235	0.0118909	0.0148894	0.0109334	0.0028861	0.00311329	0.00467369	0.00292039	0.0054734	0.00340142	0.00437221	0.00576849	0.00676898
NMW0316	Amobarbital	Heterocyclic compound	C11H18N2O3	57-43-2	0.0125417	0.010635	0.0106958	0.00977721	0.0101052	0.00932446	0.0074777	0.00932909	0.00713452	0.00776906	0.0100896	0.00728127	0.00614868	0.00570499	0.0053395	0.00514556	0.00611946	0.00525279	0.00774529	0.00749695	0.0067941	0.00650298	0.00623285	0.00868273	0.00860118	0.00925542	0.00664976
NMW0045	AmphetAmine	Amine	C9H13N	300-62-9	0.0155332	0.0157577	0.0173288	0.0133268	0.0163258	0.0129352	0.0313611	0.0406542	0.0302232	0.0324711	0.0486032	0.0343711	0.00356656	0.00316065	0.00309401	0.00309335	0.0037168	0.00310953	0.00315364	0.00302885	0.00286001	0.00286454	0.00283122	0.00320344	0.0153819	0.0192424	0.0181399
NMW0233	Anabasine	Heterocyclic compound	C10H14N2	494-52-0	0.121141	0.124074	0.16549	0.120928	0.118543	0.112364	0.149184	0.141161	0.144141	0.128039	0.187761	0.125085	0.0816481	0.0643348	0.0630019	0.0776021	0.100455	0.0901829	0.0296355	0.0261709	0.023834	0.0271147	0.0278716	0.029355	0.0870058	0.127618	0.117831
NMW0115*091	Anethole	Aromatics	C10H12O	104-46-1	0.00172623	0.00190512	0.0018554	0.00164175	0.001567	0.00188077	0.000236463	0.00027484	0.00023319	0.000249486	0.000326929	0.000249656	0.000298522	0.000264547	0.000258969	0.000258913	0.000311096	0.000260268	0.00150526	0.00149219	0.00119692	0.00134582	0.0013013	0.0016281	0.00560247	0.00662745	0.00656889
NMW0024	Aniline, N-methyl-	Amine	C7H9N	100-61-8	2.80095	2.73791	3.02736	2.67936	2.73009	2.52069	0.374933	0.435783	0.369744	0.395583	0.518376	0.395853	0.473333	0.419463	0.410618	0.410531	12.1543	0.412679	2.16715	2.00986	1.9705	1.99254	2.0368	2.13124	6.07513	6.84802	6.61843
NMW0296	Apiol	Heterocyclic compound	C12H14O4	523-80-8	0.0854501	0.0608693	0.0853498	0.0755387	0.0813289	0.0717699	0.717437	0.671123	0.525239	0.571273	0.756714	0.588029	1.65816	1.17061	1.37911	1.04186	1.65923	1.01416	0.0381845	0.0271372	0.0206754	0.0245838	0.0208615	0.0374018	0.473497	0.541784	0.51686
KMW0736	Apocynin	Ketone	C9H10O3	498-02-2	0.0541462	0.0492664	0.0489142	0.0480955	0.0480321	0.0458245	0.0328434	0.0306563	0.0312657	0.0261377	0.0447793	0.0349286	0.0309339	0.027397	0.0237102	0.0251125	0.027155	0.0256881	0.0580595	0.0563361	0.0485647	0.0530682	0.0499139	0.0597026	0.0441487	0.0521263	0.0441953
NMW0098	Arecoline	Heterocyclic compound	C8H13NO2	63-75-2	0.0296215	0.0274649	0.026762	0.0267664	0.0272287	0.0256075	0.0195581	0.0217689	0.0189459	0.0192155	0.0253515	0.0192655	0.0229422	0.0207124	0.0195074	0.0193291	0.0194659	0.0191361	0.0284479	0.0278858	0.025131	0.0267371	0.0259951	0.029706	0.018109	0.020261	0.0190146
KMW0576	Aromandendrene	Terpenoids	C15H24	489-39-4	8.34087	7.81676	8.00299	1.54535	7.87864	7.31789	15.0759	17.4613	14.0242	15.4244	19.985	13.6952	16.3626	14.4221	13.9345	13.5224	16.045	13.0135	1.82846	1.7561	1.65821	1.66084	1.64152	1.85733	9.75532	11.2806	10.3608
XMW0193	Asarone	Aromatics	C12H16O3	2883-98-9	0.199614	0.395456	0.37798	0.428216	0.323082	0.346442	1.41987	1.66054	0.902717	1.7832	2.6889	8.64253	6.78407	7.35529	6.92167	6.37342	5.01506	6.77286	0.192181	0.181623	0.115562	0.19254	0.132873	0.198369	3.38501	5.18827	4.93815
XMW0172	Azacyclohexan-3-one, 1,5,6-trimethyl-	Heterocyclic compound	C8H15NO	339590-59-9	0.0261559	0.0388108	0.0428492	0.0251931	0.0412647	0.0348766	0.0898391	0.074754	0.0916861	0.0925439	0.0816882	0.0631444	0.0478604	0.0570731	0.0538284	0.0548214	0.0644404	0.0524382	0.0304098	0.0258505	0.0241045	0.0259621	0.0229669	0.0303634	0.0286214	0.0330287	0.0468806
NMW0292	Azelaic Acid	Acid	C9H16O4	123-99-9	0.0359656	0.018649	0.020106	0.0169027	0.0236127	0.0248287	0.0350296	0.0411435	0.0391194	0.0367096	0.0390837	0.0228129	0.01698	0.0157474	0.0170925	0.0152524	0.0222224	0.0162793	0.0196792	0.0192501	0.0124131	0.0144444	0.0143037	0.0322211	0.0137244	0.01497	0.0145645
NMW0132	Azulene	Aromatics	C10H8	275-51-4	0.00313711	0.00260682	0.00452403	0.00437525	0.00333646	0.00348599	0.0153991	0.0131889	0.0111146	0.0135772	0.0174129	0.013764	0.0162754	0.0143102	0.014337	0.0138224	0.0147053	0.0131826	0.00112548	0.00118099	0.00108099	0.00114149	0.00116208	0.0013556	0.00716824	0.00827715	0.00743
XMW0544	Azulene, 1,2,3,3a,4,5,6,7-octahydro-1,4-dimethyl-7-(1-methylethenyl)-, [1R-(1.alpha.,3a.beta.,4.alpha.,7.beta.)]-	Terpenoids	C15H24	22567-17-5	7.38937	6.5156	7.63759	6.59522	6.90629	6.28808	13.8346	16.1768	12.5641	14.5601	17.5935	11.5769	0.829424	0.735027	0.719528	0.719374	0.864361	0.723138	3.92348	3.52188	3.36481	3.52571	3.60854	4.03961	9.73908	10.8538	9.89904
XMW1160	BenzAldehyde diethylacetal	Aldehyde	C11H16O2	774-48-1	6.18919	6.02456	6.19721	5.85911	5.95029	5.4132	21.9121	25.0401	21.1869	21.6235	27.239	21.188	21.1861	18.7884	18.0616	17.9812	20.7088	17.4751	5.31804	5.01574	4.87297	4.86902	4.9145	5.39435	11.1822	13.1562	12.2301
XMW0664	BenzAldehyde, 2,4-dihydroxy-3,6-dimethyl-	Aldehyde	C9H10O3	34883-14-2	0.0108979	0.00704824	0.00902113	0.00855826	0.00622506	0.00539826	0.0331251	0.0380698	0.069137	0.0333983	0.042252	0.0288311	0.02186	0.0180043	0.0167687	0.01756	0.022559	0.0167551	0.00913295	0.00712801	0.00639742	0.00617043	0.00759574	0.00805528	0.0270878	0.0427624	0.0355026
XMW0255	BenzAldehyde, 2,4-dimethyl-	Aldehyde	C9H10O	15764-16-6	0.0646008	0.057434	0.0575209	0.0463587	0.058799	0.0492541	0.2242	0.296459	0.226766	0.231172	0.265922	0.106164	0.215331	0.191699	0.183124	0.176978	0.260923	0.166308	0.0381162	0.0348777	0.031492	0.032204	0.0324634	0.0423691	0.120177	0.124832	0.096562
XMW0727	BenzAldehyde, 2,5-dimethyl-	Aldehyde	C9H10O	5779-94-2	0.105065	0.0977418	0.0902009	0.0938425	0.0933734	0.0815021	0.0714095	0.0715335	0.0711228	0.068798	0.0905431	0.066775	0.0731487	0.0628046	0.0492121	0.0648913	0.062419	0.0619549	0.0697652	0.0609073	0.0516123	0.0536469	0.0576173	0.0703022	0.0671875	0.0795448	0.0674006
WMW0061	BenzAldehyde, 2-ethyl-	Aldehyde	C9H10O	22927-13-5	0.00726388	0.00434616	0.0047342	0.00384936	0.00506767	0.00594573	0.0222987	0.0208661	0.0262669	0.0247586	0.0208486	0.0126992	0.0166791	0.0149782	0.0151399	0.0137962	0.0174086	0.0144305	0.00239758	0.00203418	0.00189135	0.00197208	0.00241672	0.004655	0.010539	0.0101976	0.00775099
NMW0254	BenzAldehyde, 3,4-dihydroxy-	Aldehyde	C7H6O3	139-85-5	0.110399	0.0745851	0.0551426	0.0548384	0.0599851	0.0579195	0.197898	0.2286	0.214597	0.187628	0.256667	0.183921	0.203238	0.179936	0.176246	0.176871	0.23954	0.124012	0.0594026	0.0610468	0.0492144	0.0490633	0.0436025	0.0746814	0.062443	0.0802486	0.0796377
NMW0216	BenzAldehyde, 3,4-dimethoxy-	Aldehyde	C9H10O3	120-14-9	0.0667455	0.0618958	0.0608508	0.0456348	0.0625646	0.0459557	0.0501908	0.0607912	0.0481692	0.0515811	0.0657825	0.0489067	0.0605908	0.0549625	0.0472555	0.0489823	0.0505214	0.048959	0.0557282	0.0586564	0.062255	0.0512806	0.0657793	0.062741	0.0539551	0.0655326	0.0632727
XMW1457	BenzAldehyde, 3-methoxy-	Aldehyde	C8H8O2	591-31-1	0.177416	0.152552	0.155348	0.113716	0.161427	0.121209	0.734927	0.90185	0.740614	0.767263	1.13322	0.457613	0.986267	0.878611	0.828879	0.808478	1.12317	0.762535	0.0930625	0.0776523	0.0703081	0.0697252	0.0697385	0.104032	0.335489	0.43337	0.390875
D219	BenzAldehyde, 4-methoxy-	Aldehyde	C8H8O2	123-11-5	0.0527836	0.0505542	0.0688971	0.0592986	0.0597957	0.0530319	0.216067	0.242022	0.207281	0.209043	0.26201	0.205929	0.329399	0.282441	0.281393	0.278839	0.30564	0.270404	0.0206704	0.0143897	0.0183252	0.0182783	0.0193507	0.0210999	0.124066	0.14073	0.135225
NMW0145	Benzamide	Amine	C7H7NO	55-21-0	0.346183	0.313055	0.35585	0.311779	0.33634	0.273373	0.590434	1.09148	0.539262	0.650898	0.829897	0.557861	0.393594	0.349683	0.329703	0.314495	0.399207	0.338414	0.157163	0.150953	0.113471	0.10296	0.145149	0.208301	0.364858	0.440528	0.355837
NMW0069	BenzenAmine, 2,5-dimethyl-	Amine	C8H11N	95-78-3	0.00662382	0.00531573	0.00639611	0.00542976	0.00826075	0.00540439	0.0254086	0.0280691	0.0232601	0.0245688	0.0279974	0.0169687	0.0155329	0.0145043	0.0123481	0.0135367	0.0251517	0.0128225	0.00487011	0.00450797	0.00440146	0.00492921	0.00375387	0.00474079	0.0119058	0.0123718	0.0099476
XMW0820	BenzenAmine, 2-ethyl-	Amine	C8H11N	578-54-1	0.0072764	0.00713739	0.00773503	0.00665624	0.00731615	0.00673993	0.0066406	0.00708019	0.00640225	0.00681313	0.00862171	0.00611357	0.0125003	0.0111744	0.0104663	0.0113318	0.0122648	0.0105504	0.00129277	0.00124161	0.0011724	0.00117425	0.0011606	0.00131318	0.00648474	0.00787582	0.00775272
XMW0715	BenzenAmine, 4-ethoxy-	Amine	C8H11NO	156-43-4	12.58	12.2315	12.6796	11.9002	12.086	10.9998	45.0343	51.5669	43.6809	44.5952	56.0604	43.5083	43.3424	38.5581	37.0925	36.9761	42.4143	35.8363	10.8421	10.2303	9.93266	9.91324	10.0014	10.991	22.7049	26.6509	24.7372
XMW0812	Benzene, (1-methyl-1-propylpentyl)-	Aromatics	C15H24	54932-91-1	0.424152	0.339976	0.412857	0.3171	0.371545	0.33584	0.0559327	0.0650103	0.0551586	0.0590133	0.0773316	0.0590535	0.0706121	0.0625757	0.0612562	0.0612432	0.0735865	0.0615636	0.334402	0.30461	0.283117	0.307433	0.313067	0.355907	0.543681	0.826792	0.61788
NMW0778	Benzene, (1-methylethyl)-	Aromatics	C9H12	98-82-8	1.9321	1.90979	2.16539	1.96545	2.02399	1.9056	6.54681	6.57313	6.14165	6.9071	7.57268	6.27971	8.30967	7.81477	7.39048	7.11669	7.96232	7.25247	0.689529	0.629164	0.659168	0.660306	0.701549	0.639802	3.74509	4.10104	4.15053
NMW0794	Benzene, (1-methylpropyl)-	Aromatics	C10H14	135-98-8	0.35824	0.345765	0.385902	0.351313	0.34721	0.314171	0.604738	0.607595	0.556975	0.622509	0.71122	0.687009	1.13916	0.659049	0.977284	0.960704	0.701689	0.96354	0.166069	0.168366	0.160549	0.155382	0.170307	0.171554	0.486513	0.470919	0.46607
XMW1439	Benzene, (1-nitropropyl)-	Aromatics	C9H11NO2	5279-14-1	0.88934	0.683785	0.938839	0.694306	0.856724	0.620984	3.32967	3.75331	3.14319	3.37616	4.28494	3.33759	4.0841	3.60366	3.50167	3.4557	3.98075	3.4459	0.235571	0.223951	0.220572	0.213545	0.233037	0.241268	1.37007	1.67171	1.49469
D113	Benzene, (2,2-dimethoxyethyl)-	Aromatics	C10H14O2	101-48-4	0.0019064	0.0018531	0.00207394	0.00183227	0.00205779	0.00174881	0.00747046	0.00841951	0.00730155	0.00752615	0.00862069	0.00665281	0.0104541	0.00905327	0.00958417	0.00958128	0.0103816	0.00865774	0.00127285	0.00104012	0.000949308	0.00114319	0.00119715	0.00126221	0.00538136	0.00600598	0.00613566
KMW0384	Benzene, (2-nitroethyl)-	Aromatics	C8H9NO2	6125-24-2	0.0227824	0.0197247	0.0240101	0.0222737	0.0221182	0.0200486	0.0851455	0.0960003	0.0806063	0.0869732	0.111488	0.0874492	0.104633	0.0938007	0.0903139	0.0883137	0.104725	0.0899441	0.00669927	0.00567034	0.00587934	0.00584306	0.00611403	0.00667766	0.0487282	0.0427345	0.0412359
XMW1464	Benzene, (butoxymethyl)-	Ether	C11H16O	588-67-0	0.142142	0.131741	0.150019	0.13138	0.13157	0.123776	0.457467	0.48994	0.438777	0.448537	0.567462	0.44145	0.706718	0.611684	0.612357	0.605052	0.672633	0.606142	0.0494991	0.0460652	0.0361051	0.0442852	0.0473022	0.0491153	0.220287	0.256901	0.249526
KMW0224	Benzene, (methoxymethyl)-	Ether	C8H10O	538-86-3	0.778137	0.778803	0.713154	0.67496	0.676175	0.63265	2.48329	2.76426	2.37972	2.5418	3.16479	2.47095	2.76548	2.83709	2.42855	2.36715	2.79751	2.31918	0.589342	0.367989	0.381599	0.485396	0.509692	0.549472	1.39472	1.59957	1.56752
D98	Benzene, (methylthio)-	Sulfur compounds	C7H8S	100-68-5	0.634947	0.607003	0.604287	0.581113	0.603695	0.575402	0.391875	0.494951	0.443077	0.400488	0.530054	0.266352	0.0636969	0.0564476	0.0552573	0.0552455	0.06638	0.0555346	0.65344	0.657741	0.601863	0.621285	0.599989	0.689511	0.457457	0.633163	0.502979
XMW0233	Benzene, 1,1'-(1,1,2,2-tetramethyl-1,2-ethanediyl)bis-	Aromatics	C18H22	1889-67-4	0.0305033	0.0144566	0.0136984	0.0102406	0.0133953	0.0151818	0.0258702	0.0505639	0.0280483	0.0259999	0.0441478	0.0198722	0.0246646	0.0211741	0.0224685	0.0194583	0.0271862	0.0160408	0.00917399	0.0178962	0.00887454	0.0131338	0.00805451	0.0195229	0.014538	0.0172896	0.0120383
NMW0269	Benzene, 1,1'-(1,3-propanediyl)bis-	Aromatics	C15H16	1081-75-0	0.0571526	0.0467943	0.0486814	0.0457044	0.0463946	0.0429144	0.0470606	0.0509018	0.0572009	0.0448424	0.0581705	0.0566706	0.0498719	0.0467902	0.0448114	0.0420935	0.0290756	0.0426465	0.0417605	0.0385338	0.0343779	0.0348777	0.0360399	0.0461626	0.0363458	0.0404301	0.0304361
XMW0366*027	Benzene, 1,2,3,5-tetramethyl-	Aromatics	C10H14	527-53-7	1.05344	0.963329	1.20913	1.00264	1.16162	1.16672	7.99324	7.90667	8.16498	7.58854	8.02393	4.30808	8.79299	7.63183	7.30854	7.53751	10.2142	6.85633	0.594155	0.555086	0.54661	0.544414	0.390804	0.617392	3.62726	3.08162	3.48905
KMW0634*103	Benzene, 1,2,3-trimethoxy-5-(1-propenyl)-, (E)-	Aromatics	C12H16O3	5273-85-8	0.00832604	0.00817517	0.00893545	0.00958494	0.00801578	0.00694953	0.0218002	0.0277603	0.0222066	0.0242825	0.0314843	0.0249603	0.0290026	0.0277021	0.0255037	0.0255472	0.0294231	0.0237529	0.00826904	0.00598575	0.00642279	0.0063323	0.00612888	0.00671424	0.0149314	0.0157782	0.0146724
NMW0012	Benzene, 1,2,3-trimethyl-	Aromatics	C9H12	526-73-8	1.05675	1.02673	1.1593	0.959884	1.04719	0.95843	0.120752	0.140349	0.119081	0.127402	0.166949	2.78086	2.02271	1.89738	2.35002	2.75497	3.42057	2.24949	0.697221	0.647299	0.646582	0.616914	0.637556	0.691482	1.19743	1.14243	1.30915
KMW0273*027	Benzene, 1,2,4,5-tetramethyl-	Aromatics	C10H14	95-93-2	1.05344	0.963329	1.20913	1.00264	1.16162	1.16672	7.99324	7.90667	8.16498	7.58854	8.02393	4.30808	8.79299	7.63183	7.30854	7.53751	10.2142	6.85633	0.594155	0.555086	0.54661	0.544414	0.390804	0.617392	3.62726	3.08162	3.48905
KMW0150	Benzene, 1,2,4-trimethyl-	Aromatics	C9H12	95-63-6	0.230453	0.237989	0.267778	0.250076	0.244976	0.229656	1.14972	1.20084	1.02962	1.19194	1.36126	1.07511	1.24409	1.12823	1.06274	1.04165	1.19542	1.04228	0.154761	0.144047	0.149307	0.154373	0.164098	0.147953	0.385195	0.41596	0.404457
NMW0164	Benzene, 1,2-(methylenedioxy)-4-propenyl-, (E)-	Aromatics	C10H10O2	4043-71-4	1.59083	1.39107	1.59521	1.36105	1.46013	1.31824	4.70621	5.39128	4.41611	4.86353	6.09527	3.5867	7.09135	6.28168	6.05257	5.60659	6.75183	5.27442	2.5266	2.29033	2.23093	2.53798	2.77647	2.52568	3.20962	3.50763	3.11429
XMW1095	Benzene, 1,2-diethyl-3,4,5,6-tetramethyl-	Aromatics	C14H22	33884-69-4	0.330586	0.317334	0.32025	0.313703	0.3183	0.297103	4.43027	5.04017	4.20494	4.45865	5.7888	3.90404	3.47431	2.85788	2.83886	3.11352	3.72243	1.8299	0.371172	0.356485	0.336613	0.337146	0.333224	0.377034	2.2922	2.66216	2.45179
XMW0784	Benzene, 1,2-diethyl-3,4-dimethyl-	Aromatics	C12H18	54410-75-2	0.0195965	0.0207056	0.0243272	0.0236453	0.0218333	0.019576	0.0696554	0.0831357	0.0439088	0.0782692	0.108012	0.0945619	0.0237358	0.0200077	0.0195552	0.0178541	0.0194113	0.01743	0.00699386	0.00734433	0.00643676	0.00800863	0.00918181	0.00822988	0.030396	0.0369286	0.0348577
XMW0041	Benzene, 1,2-dimethoxy-4-(1-propenyl)-	Aromatics	C11H14O2	93-16-3	0.67235	0.645399	0.65133	0.638015	0.647365	0.604253	11.9192	14.9347	10.6935	11.491	15.8137	13.8159	5.36285	5.31881	4.4953	4.64135	5.18606	4.50972	0.754897	0.725025	0.68461	0.685693	0.677717	0.766818	3.14475	3.73031	3.56703
NMW0199	Benzene, 1,2-dinitro-	Aromatics	C6H4N2O4	528-29-0	0.00392432	0.00304283	0.00367154	0.00347553	0.00216474	0.00215878	0.00245325	0.00382497	0.00666365	0.00307192	0.0086008	0.00230668	0.00243051	0.00245357	0.00233217	0.0016444	0.00714083	0.00269331	0.00211125	0.00256439	0.00225261	0.00241866	0.00218746	0.00288947	0.00622014	0.0080131	0.00695147
XMW0786	Benzene, 1,3,5-triethyl-	Aromatics	C12H18	102-25-0	0.00439632	0.00403935	0.0046291	0.00383214	0.00402176	0.0036094	0.0079262	0.00848771	0.00688186	0.00815251	0.00923427	0.00718128	0.00871517	0.00732812	0.00755475	0.00713879	0.00832444	0.00720476	0.0019975	0.00271555	0.00141081	0.00116675	0.00151215	0.00210564	0.00463953	0.00580115	0.0058251
KMW0070*006	Benzene, 1,3-dimethyl-	Aromatics	C8H10	108-38-3	0.0156102	0.0189603	0.0213978	0.0194831	0.0189737	0.0184515	0.021016	0.0247864	0.0208575	0.0235084	0.0263953	0.0269576	0.0259644	0.0252046	0.0243105	0.0250767	0.0266564	0.0265457	0.0171395	0.0138744	0.0176355	0.0155653	0.018451	0.0170641	0.027637	0.029351	0.0328937
XMW0011*094	Benzene, 1,4-diethyl-	Aromatics	C10H14	105-05-5	17.3391	16.8791	23.2238	15.7302	17.2546	15.6988	113.704	117.307	113.105	110.635	120.162	62.689	75.6346	78.6733	61.6495	63.6317	78.9668	58.662	14.3916	13.8703	14.6625	12.6002	12.8381	14.5904	38.1265	36.6598	39.5865
XMW1157	Benzene, 1,4-dimethoxy-2-methyl-5-isopropyl-	Aromatics	C12H18O2	14753-08-3	3.79965	4.07148	3.6688	3.87941	3.61075	3.62443	7.93608	7.68869	7.34008	6.5261	8.54885	8.09084	7.21498	5.38018	5.23765	5.96463	7.14816	4.94315	0.842106	0.808783	0.763699	0.764907	0.75601	0.855404	5.41825	6.39708	5.15586
XMW1101	Benzene, 1,4-dimethyl-2,5-bis(1-methylethyl)-	Aromatics	C14H22	10375-96-9	0.0249028	0.0184101	0.0216636	0.0172548	0.0209813	0.0164713	0.0485327	0.038341	0.0448805	0.0468229	0.0567821	0.0400048	0.0332264	0.0273811	0.0354471	0.0255816	0.0306554	0.0231394	0.013694	0.0122191	0.0128397	0.012906	0.0143097	0.0137496	0.0282938	0.0306522	0.0242368
WMW0053	Benzene, 1-(1,5-dimethylhexyl)-4-methyl-	Terpenoids	C15H24	1461-02-5	1.33804	1.16244	1.29475	1.18939	1.21618	1.11545	1.7452	1.86892	1.71673	1.73114	2.27803	1.97924	1.9523	1.74255	1.71396	1.75614	2.1963	1.75428	0.806519	0.74655	0.706628	0.721907	0.730434	0.856154	1.09918	1.95457	1.76104
KMW0504	Benzene, 1-ethenyl-4-methoxy-	Aromatics	C9H10O	637-69-4	0.183092	0.162261	0.174701	0.15394	0.167307	0.153728	1.33611	1.4147	1.4055	1.47412	1.46664	0.596478	1.86379	1.74518	1.48666	1.57216	2.13076	1.33517	0.110702	0.101227	0.0928041	0.0960904	0.0992138	0.109353	0.421624	0.422315	0.457894
NMW0791	Benzene, 1-ethyl-2-methyl-	Aromatics	C9H12	611-14-3	1.40566	1.42552	1.5335	1.44331	1.45218	1.35003	5.19775	5.48015	4.75642	5.40602	6.29125	4.97021	5.91485	5.37853	5.14375	5.04815	5.64297	4.99487	1.08579	0.982616	1.0095	1.00533	0.73276	1.0044	2.53049	2.91112	2.86212
XMW0037	Benzene, 1-ethyl-3,5-dimethyl-	Aromatics	C10H14	934-74-7	4.42312	4.28789	4.86697	4.57515	4.59116	3.94424	0.638682	0.742338	0.629843	0.67386	0.883032	0.674319	0.806303	0.714538	0.699471	0.699322	0.840267	0.702981	3.68539	3.47072	3.3698	3.39121	3.43904	3.62106	9.73808	10.5291	10.2552
NMW0789	Benzene, 1-ethyl-3-methyl-	Aromatics	C9H12	620-14-4	0.0714917	0.0743786	0.0844456	0.0778331	0.0766605	0.0713655	0.37119	0.373351	0.34509	0.385194	0.423583	0.374462	0.401348	0.37487	0.348908	0.342359	0.378121	0.353466	0.0488067	0.0458469	0.0489938	0.0483407	0.0512363	0.0461712	0.174587	0.194443	0.201218
KMW0192	Benzene, 1-methoxy-2-methyl-	Ether	C8H10O	578-58-5	0.671715	0.661241	0.707108	0.686706	0.642742	0.614045	1.66	1.74366	1.53659	1.7144	1.85969	1.63098	1.40708	1.27672	1.19061	1.188	1.27733	1.20581	0.289884	0.286849	0.2718	0.271398	0.335545	0.337989	0.994485	1.00959	0.809149
XMW1469	Benzene, 1-methoxy-4-(1-methylpropyl)-	Ether	C11H16O	4917-90-2	0.0116763	0.0115322	0.0116612	0.0105986	0.0111435	0.00953715	0.0508749	0.057442	0.048832	0.0500493	0.0619092	0.0445504	0.0407818	0.0364046	0.0346284	0.0344548	0.0398997	0.0330539	0.011549	0.0109368	0.0109536	0.0108111	0.0109138	0.0116453	0.0227088	0.0294235	0.0275746
XMW0540	Benzene, 1-methoxy-4-methyl-2-(1-methylethyl)-	Aromatics	C11H16O	31574-44-4	0.209302	0.200962	0.20298	0.190976	0.207162	0.177523	1.41814	1.63928	1.39037	1.41355	1.70947	1.30279	2.01789	1.78435	1.7943	1.73128	1.92119	1.62854	0.123185	0.11086	0.108609	0.113984	0.115837	0.124928	0.618821	0.664828	0.666927
NMW0192	Benzene, 1-methoxy-4-nitro-	Aromatics	C7H7NO3	100-17-4	0.0394289	0.0334674	0.0411571	0.0343339	0.0375819	0.0327233	0.00981541	0.0940325	0.0755725	0.0831713	0.10638	0.0727262	0.0856285	0.0778833	0.0736085	0.0706669	0.0859063	0.0677199	0.00219136	0.00210465	0.00198733	0.00199047	0.00196732	0.00222597	0.0507739	0.0574589	0.0522288
XMW1171	Benzene, 1-methoxy-4-phenoxy-	Aromatics	C13H12O2	1655-69-2	1.31582	1.03305	1.08033	1.02018	1.05144	0.960951	0.971201	1.16874	0.940485	0.997626	1.23875	0.826614	0.78032	0.696304	0.663553	0.632649	0.765636	0.628931	0.877614	0.858665	0.779566	0.80974	0.820899	0.990709	1.0381	1.14277	0.846769
XMW0126*016	Benzene, 1-methyl-3-(1-methylethyl)-	Terpenoids	C10H14	535-77-3	51.9339	50.5106	51.8228	46.311	49.3038	46.5915	307.467	321.51	306.084	303.359	359.161	175.854	243.652	222.839	202.283	205.133	257.96	190.368	41.165	39.586	41.9458	41.329	42.5585	41.4567	108.338	100.608	114.721
XMW0247	Benzene, 1-methyl-4-(1,2,2-trimethylcyclopentyl)-, (R)-	Terpenoids	C15H22	16982-00-6	0.418839	0.354827	0.402744	0.346779	0.377708	0.345086	0.448683	0.545168	0.444613	0.467748	0.634368	0.373063	0.638778	0.562231	0.544171	0.379911	0.44552	0.370277	0.274834	0.257798	0.241609	0.249573	0.256666	0.29231	0.31678	0.444801	0.412919
NMW0083	Benzene, 1-methyl-4-nitro-	Aromatics	C7H7NO2	99-99-0	0.137155	0.113635	0.117041	0.0928487	0.122175	0.101875	0.31338	0.084608	0.227172	0.300489	0.0786699	0.0420495	0.0878416	0.0754814	0.0676408	0.0689972	0.0884241	0.0704889	0.062824	0.0642233	0.0542793	0.059461	0.0504213	0.081087	0.149076	0.122079	0.11179
XMW0712	Benzene, 1-propynyl-	Aromatics	C9H8	673-32-5	0.504953	0.491523	0.552625	0.516374	0.520018	0.452473	0.0691485	0.080371	0.0681915	0.072957	0.0956035	0.0730067	0.0872963	0.0773611	0.0757298	0.0757137	0.0909735	0.0761099	0.39988	0.371845	0.363489	0.369001	0.373843	0.392043	1.11769	1.22564	1.21555
NMW0117	Benzene, 2,4-pentadiynyl-	Aromatics	C11H8	41268-41-1	1.16899	1.22526	1.28878	1.11316	1.19889	1.03059	4.37564	4.99179	4.1931	4.37522	5.54051	4.2828	4.29815	3.85404	3.67628	3.68506	4.13465	3.55885	1.02984	0.965695	0.942514	0.936493	0.946984	1.04314	2.28128	2.61073	2.43541
XMW0982	Benzene, [1-[[1-(1-methylethyl)-3-butenyl]oxy]ethyl]-, [S-(R*,R*)]-	Aromatics	C15H22O	98088-51-8	3.27152	2.91365	3.27371	2.91888	3.04929	2.76803	6.82396	7.96759	6.39245	7.09318	9.0561	5.98199	8.14814	7.3097	6.99778	6.55305	7.84606	6.25646	0.482221	0.443396	0.44257	0.447877	0.435992	0.479123	4.17768	4.63442	4.24173
D301	BenzeneacetAldehyde, .alpha.-(2-methylpropylidene)-	Aldehyde	C12H14O	26643-91-4	0.0117802	0.00986482	0.0113737	0.00994776	0.0103408	0.00921488	0.0364049	0.0419241	0.0338826	0.0370605	0.0470148	0.0278062	0.0434145	0.0479849	0.0369626	0.0337736	0.0405397	0.0320457	0.00891367	0.00827629	0.00719016	0.00749926	0.00800537	0.0090461	0.0176971	0.0222346	0.0169191
D173	BenzeneacetAldehyde, 4-methyl-	Aldehyde	C9H10O	104-09-6	0.422167	0.388058	0.411816	0.333499	0.387462	0.33318	2.39482	2.19809	2.44987	2.28313	2.46101	1.33985	2.66768	2.33882	2.34076	2.40977	2.96579	2.18103	0.169587	0.158069	0.158286	0.155707	0.159535	0.178664	1.08926	0.901492	0.926409
XMW1176	Benzeneacetic Acid, .alpha.-cyclopentyl-	Acid	C13H16O2	3900-93-4	0.00169276	0.00162491	0.00163984	0.00160632	0.00162986	0.00152131	0.0017026	0.00197892	0.00167904	0.00179637	0.00235398	0.0017976	0.0476558	0.0416475	0.0409433	0.0413416	0.0500652	0.0383544	0.00190059	0.00182538	0.00172363	0.00172635	0.00170627	0.0019306	0.00730413	0.0138043	0.00898064
KMW0445	Benzeneacetic acid	Acid	C8H8O2	103-82-2	0.266421	0.325376	0.293545	0.318063	0.321177	0.238053	0.857844	0.925522	0.825074	0.844556	1.0737	0.834213	1.31735	1.1462	1.14741	1.13703	1.26526	1.14113	0.100478	0.0925691	0.0911549	0.091387	0.0982564	0.100234	0.418889	0.592488	0.561433
KMW0441	Benzeneacetic acid, ethyl ester	Ester	C10H12O2	101-97-3	0.0585239	0.0542975	0.0610083	0.0517062	0.0571622	0.0506898	0.311099	0.351038	0.299623	0.30591	0.369028	0.282661	0.443934	0.3931	0.387804	0.382021	0.406827	0.360389	0.0380917	0.0342634	0.0357575	0.0329167	0.0353777	0.0369512	0.139388	0.147556	0.146499
NMW0111	BenzeneethanAmine, N,.alpha.,.alpha.-trimethyl-	Amine	C11H17N	100-92-5	0.161818	0.199246	0.213824	0.197863	0.19274	0.16923	0.272389	0.325216	0.225769	0.260189	0.350483	0.253674	0.35219	0.314831	0.294271	0.299705	0.347948	0.298191	0.110841	0.0962762	0.100389	0.103955	0.115417	0.109182	0.205326	0.221691	0.221539
XMW0545	Benzenemethanamine, N-(1-methylethyl)-	Amine	C10H15N	102-97-6	0.0284565	0.0186055	0.0187187	0.00880786	0.0208327	0.0123526	0.0972913	0.132006	0.115889	0.100056	0.113704	0.0545642	0.0840949	0.0797057	0.0804278	0.0772787	0.104335	0.076085	0.0144733	0.00798137	0.00630147	0.0110573	0.00679623	0.0183728	0.0494584	0.0490741	0.0393955
KMW0408	Benzenemethanol, .alpha.,.alpha.,4-trimethyl-	Terpenoids	C10H14O	1197-01-9	1.97427	1.53903	1.55477	1.14502	1.62191	1.21338	7.31785	9.05362	9.46134	7.67466	11.2281	4.40678	9.61652	8.56442	8.09213	7.88957	11.3333	7.45354	0.937072	0.775549	0.6944	0.701239	0.703549	1.04509	3.29047	4.33113	3.89602
XMW0735	Benzenemethanol, .alpha.-2-propenyl-	Alcohol	C10H12O	936-58-3	0.205099	0.192241	0.182173	0.180433	0.185053	0.168194	0.116347	0.190124	0.158692	0.113798	0.208593	0.109756	0.134672	0.113529	0.109148	0.115324	0.105511	0.103188	0.188302	0.183772	0.16677	0.176399	0.167252	0.196783	0.172564	0.193684	0.171957
NMW0022	Benzenemethanol, .alpha.-methyl-	Alcohol	C8H10O	98-85-1	7.32373	7.03015	7.09476	6.94973	7.05157	6.58196	72.9965	81.7283	68.9204	75.222	92.2245	71.5117	75.2492	66.3725	64.3042	63.0204	70.0753	62.0179	8.22289	7.8975	7.45727	7.46906	7.38219	8.35274	35.2401	40.1155	38.8547
D200	Benzenemethanol, 3-hydroxy-	Alcohol	C7H8O2	620-24-6	0.00943155	0.00806205	0.00949454	0.00866814	0.00789504	0.00762391	0.0147282	0.0082228	0.0131651	0.0136446	0.00895469	0.00611012	0.0129075	0.0127598	0.0109328	0.0115231	0.0131056	0.0117092	0.00881836	0.008957	0.000220757	0.00110553	0.00939163	0.00961524	0.00911197	0.00982903	0.00998042
NMW0183	Benzenemethanol, 4-hydroxy-	Alcohol	C7H8O2	623-05-2	2.8037	2.69131	13.5802	2.66052	2.6995	2.51973	27.8739	32.0321	26.1736	28.3856	36.7383	24.3729	30.084	26.4857	25.5582	24.1824	28.6772	23.2418	3.14791	3.02335	2.85482	2.85933	2.82607	3.19763	16.5312	19.1379	17.2825
KMW0450	Benzenemethanol, 4-methoxy-	Phenol	C8H10O2	105-13-5	0.423765	0.404785	0.455471	0.40021	0.400126	0.369942	1.63404	1.86353	1.57016	1.62234	2.05105	1.59304	1.58757	1.42069	1.35987	1.3557	1.52576	1.31001	0.360859	0.338966	0.331891	0.330577	0.334547	0.368075	0.82036	0.95643	0.886324
NMW0279	Benzenepropanoic Acid, 4-hydroxy-	Acid	C9H10O3	501-97-3	0.328237	0.226133	0.245014	0.233094	0.237305	0.21129	0.375001	0.45469	0.35385	0.385448	0.509494	0.361215	0.336054	0.29661	0.283024	0.26735	0.332331	0.267352	0.186909	0.174775	0.157437	0.164341	0.164356	0.2069	0.275001	0.309581	0.249692
D143	Benzenepropanoic acid, methyl ester	Ester	C10H12O2	103-25-3	0.00354293	0.00331976	0.00355203	0.00313046	0.00353122	0.00392944	0.000598549	0.000695691	0.000590265	0.000631515	0.000827544	0.000631946	0.0310401	0.0278695	0.0264797	0.0264916	0.0298165	0.0259101	0.00371995	0.00325677	0.00404054	0.00343675	0.00342122	0.00339352	0.0082726	0.00957586	0.00972376
D139	Benzenepropanol, .alpha.,.alpha.-dimethyl-	Alcohol	C11H16O	103-05-9	0.225722	0.212216	0.23549	0.21783	0.216353	0.199826	1.06738	1.2097	1.17849	1.07214	1.36636	1.0693	1.45526	1.26378	1.26824	1.25198	1.3556	1.21973	0.0968612	0.0885987	0.0854163	0.0739199	0.0919007	0.10027	0.372016	0.617568	0.582979
NMW0278	Benzenepropanol, 4-hydroxy-3-methoxy-	Alcohol	C10H14O3	2305-13-7	0.0946875	0.0721604	0.075643	0.0651395	0.0742219	0.0679198	0.121045	0.149383	0.152928	0.122756	0.14952	0.0948892	0.0905172	0.0881076	0.0787531	0.0820084	0.102914	0.077049	0.0495658	0.056711	0.0400174	0.0422685	0.0417852	0.0693296	0.0597672	0.062726	0.0717193
NMW0011	Benzofuran	Heterocyclic compound	C8H6O	271-89-6	0.0196475	0.0196457	0.0206034	0.0203489	0.0202186	0.0184507	0.0432146	0.0451383	0.0410386	0.0461131	0.0503539	0.0482861	0.0522438	0.0478947	0.0510198	0.0444831	0.0548898	0.0452318	0.00907514	0.00968393	0.00886372	0.0090175	0.00959899	0.00983524	0.0259649	0.0241509	0.0251013
NMW0160	Benzoic Acid, 2,3-dihydroxy-	Acid	C7H6O4	303-38-8	0.00519009	0.005135	0.00556061	0.00497745	0.00473411	0.00480437	0.0235082	0.025919	0.0221521	0.0235136	0.0294539	0.0179747	0.0213527	0.0195472	0.0183979	0.0173511	0.0211499	0.0175977	0.0011041	0.00106041	0.0010013	0.00100288	0.000991216	0.00112153	0.0112808	0.0126236	0.0107701
NMW0197	Benzoic Acid, 4-methoxy-	Acid	C8H8O3	100-09-4	1.69226	1.62443	1.63936	1.60584	1.62937	1.52087	10.0273	11.8778	9.83347	10.5817	13.4012	22.6622	10.744	13.3416	14.3354	22.5392	26.8763	21.3074	1.90003	1.82484	1.72312	1.72584	1.70577	1.93003	15.6181	18.1428	16.3816
KMW0462	Benzoic acid	Acid	C7H6O2	65-85-0	0.237118	0.22041	0.217915	0.0304079	0.0308535	0.193808	0.346609	0.404529	0.34968	0.328037	0.334154	0.178979	0.402002	0.37249	0.278058	0.322133	0.339903	0.298003	0.0359785	0.0345548	0.0326286	0.0326802	0.0323001	0.0365467	0.210391	0.190353	0.170005
XMW1443	Benzoic acid, 1,2,3,4,5-pentamethylcyclopenta-2,4-dienyl ester	Ester	C17H20O2	119254-26-1	0.0209946	0.0174831	0.0209134	0.0189914	0.018888	0.0180749	0.0129644	0.0173739	0.0135398	0.0135437	0.0174637	0.0147316	0.0769477	0.0734273	0.0756956	0.067916	0.0934915	0.0702032	0.0215576	0.019402	0.0186637	0.0171113	0.0168221	0.0250492	0.0260701	0.0283613	0.0310952
w13	Benzoic acid, 2-methyl-, methyl ester	Ester	C9H10O2	89-71-4	0.006227	0.00333553	0.00353875	0.00285874	0.00384102	0.00499929	0.020169	0.0199744	0.0230522	0.0225511	0.0200224	0.00895147	0.0158459	0.0136499	0.0146893	0.0134154	0.0159609	0.0137	0.00256186	0.00268431	0.00187912	0.00182863	0.00214982	0.00325691	0.00921102	0.00877841	0.00734069
XMW0287	Benzoic acid, 2-methylpropyl ester	Ester	C11H14O2	120-50-3	0.329828	0.287644	0.34967	0.320408	0.320437	0.290087	1.22874	1.38564	1.15748	1.26081	1.61902	1.25383	1.52996	1.35422	1.30468	1.28291	1.50697	1.29665	0.0953384	0.0850378	0.0813787	0.0866883	0.0913157	0.0961936	0.704936	0.635814	0.768541
XMW0776	Benzoic acid, 2-propenyl ester	Ester	C10H10O2	583-04-0	0.139089	0.131795	0.144017	0.125557	0.126899	0.113858	0.433711	0.482259	0.415783	0.416937	0.515939	0.407496	0.646861	0.553208	0.551209	0.551522	0.612471	0.542069	0.034271	0.0326529	0.0313718	0.0382308	0.04177	0.033401	0.207813	0.233286	0.219942
XMW1189	Benzoic acid, 3,5-dihydroxy-, methyl ester	Ester	C8H8O4	2150-44-9	0.0125492	0.0729099	0.017456	0.0745212	0.016223	0.017885	0.11383	0.218211	0.0413206	0.198011	0.295477	0.586524	0.45172	0.481942	0.468734	0.412726	0.341052	0.454951	0.0399557	0.00910553	0.0062052	0.0333708	0.0305597	0.040711	0.226269	0.346812	0.278055
WMW0212	Benzoic acid, 4-ethoxy-, ethyl ester	Ester	C11H14O3	23676-09-7	0.555417	0.359572	0.520961	0.349172	0.516713	0.346781	2.38352	2.65012	2.27144	2.38771	3.01907	1.43682	1.8626	2.32483	2.26887	1.57319	1.91686	1.33297	0.47167	0.438272	0.405653	0.419432	0.42177	0.49306	0.875727	0.840528	0.787949
KMW0373	Benzoic acid, ethyl ester	Ester	C9H10O2	93-89-0	0.0569654	0.0351722	0.0369058	0.0309698	0.0403522	0.0435984	0.185232	0.177916	0.207913	0.206287	0.176849	0.077653	0.138482	0.12377	0.129582	0.11789	0.144657	0.12142	0.0265616	0.0235158	0.0135514	0.0140839	0.0240768	0.0317996	0.0800371	0.0776042	0.0646823
XMW0473	Benzoic acid, hexyl ester	Ester	C13H18O2	6789-88-4	0.299616	0.222277	0.240799	0.212813	0.241148	0.22605	0.252616	0.321113	0.260976	0.258599	0.338376	0.214619	0.174722	0.161457	0.162375	0.162375	0.223024	0.15578	0.149168	0.143551	0.112818	0.12118	0.120535	0.197102	0.175386	0.20387	0.178108
KMW0426	Benzonitrile	Nitrogen compounds	C7H5N	100-47-0	0.0596495	0.0619248	0.0705241	0.0654908	0.0643103	0.0598382	0.300097	0.311438	0.267737	0.310634	0.354532	0.278455	0.325002	0.292622	0.276153	0.270844	0.312001	0.271824	0.042516	0.0381836	0.0392674	0.0404285	0.0426136	0.0398977	0.0993651	0.112172	0.107002
NMW0270	Benzophenone	Ketone	C13H10O	119-61-9	0.466209	0.38253	0.397124	0.371458	0.382923	0.352141	0.383432	0.427289	0.369206	0.375665	0.477136	0.31741	0.277488	0.24481	0.23668	0.230427	0.280095	0.236243	0.265603	0.25222	0.230164	0.23774	0.239733	0.293377	0.297834	0.315651	0.296187
XMW0657	Benzoxazole, 2-methyl-	Heterocyclic compound	C8H7NO	95-21-6	0.0387566	0.0357631	0.036711	0.0310501	0.0346528	0.0311465	0.329982	0.354058	0.326227	0.323166	0.402388	0.201754	0.400871	0.363674	0.32202	0.334424	0.370412	0.300345	0.0173806	0.0155768	0.0152906	0.0151461	0.014875	0.0172796	0.140266	0.117465	0.137527
NMW0362	BenzphetAmine	Amine	C17H21N	156-08-1	0.0126986	0.00876474	0.00990351	0.00732745	0.00906075	0.00696911	0.0146297	0.0261285	0.0156654	0.0154517	0.0273486	0.0121419	0.0122775	0.0106593	0.010656	0.010886	0.0160282	0.00914958	0.00557739	0.00568293	0.00480698	0.00384588	0.00392484	0.0083317	0.00890688	0.0115283	0.00747348
KMW0323	Benzyl Alcohol	Alcohol	C7H8O	100-51-6	0.830177	0.816165	0.863745	0.819965	0.82984	0.766078	3.91202	4.27107	3.58613	3.94516	4.80006	3.42217	5.40627	4.78235	4.63235	4.52879	5.28646	4.46626	0.473869	0.442296	0.450879	0.364488	0.366666	0.460051	1.80305	1.56346	1.9671
XMW0971	Benzyl angelate	Ester	C12H14O2	37526-87-7	1.84736	1.59346	1.81381	1.64159	1.68296	1.52236	2.47692	2.67021	2.39699	2.46237	3.19834	2.74728	3.01868	2.66348	2.62068	2.4713	3.04502	2.44204	1.09895	0.828276	0.764043	0.986612	1.00875	1.17716	2.33942	1.93047	1.72592
D423	Benzyl tiglate	Ester	C12H14O2	37526-88-8	0.8798	0.775834	0.700953	0.815405	0.829145	0.746552	2.71672	3.30069	2.48133	2.78696	3.61513	2.745	2.42257	1.75802	2.07576	1.90933	2.19889	1.80043	0.546214	0.491826	0.46631	0.481383	0.513425	0.543775	1.11224	1.24224	1.13453
NMW0013	Benzylamine	Amine	C7H9N	100-46-9	0.242036	0.235161	0.251216	0.244464	0.231595	0.218327	0.576296	0.602905	0.532374	0.594783	0.644303	0.572596	0.493194	0.444236	0.416483	0.415683	0.450229	0.421476	0.103026	0.0981011	0.0925006	0.0938635	0.106238	0.107972	0.296557	0.287452	0.280032
XMW0751	Bergamotol, Z-.alpha.-trans-	Terpenoids	C15H24O	88034-74-6	0.3765	0.335726	0.381113	0.354189	0.35479	0.329421	0.334468	0.459563	0.320222	0.361862	0.486009	0.379389	0.293711	0.279852	0.264277	0.244993	0.326867	0.246835	0.181243	0.184601	0.150898	0.158188	0.147202	0.21226	0.198253	0.240808	0.249946
QWM0005	Berteroin	Others	C7H13NS2	4430-42-6	0.00188707	0.00181142	0.00182807	0.0017907	0.00181694	0.00169594	0.0134858	0.0117151	0.0130189	0.0115138	0.0168796	0.0137726	0.0146011	0.0121798	0.0120246	0.0144672	0.0169147	0.0104456	0.00211875	0.00203491	0.00192147	0.00192451	0.00190213	0.00215221	0.00957867	0.0128279	0.0118933
XMW1229	Bicyclo(3.3.1)non-2-ene	Hydrocarbons	C9H14	6671-66-5	5.10832	5.15936	5.58911	5.23061	5.29685	4.87697	0.564718	0.65637	0.556903	0.595822	0.78077	0.596228	0.712927	0.631789	0.618467	0.618335	0.742958	0.62157	3.7574	3.02721	3.49317	3.50716	3.69437	3.50316	8.87495	9.27388	9.99955
WMW0202*009	Bicyclo[2.2.1]hept-2-ene, 1,7,7-trimethyl-	Terpenoids	C10H16	464-17-5	0.0262019	0.0296851	0.0336233	0.0198717	0.0305842	0.0198343	0.0704419	0.0593181	0.0646968	0.0696029	0.127731	0.0685611	0.0760494	0.0754338	0.0703767	0.0685954	0.067737	0.0712103	0.0150065	0.00897079	0.00995812	0.0101801	0.0104842	0.0143421	0.0337384	0.0558093	0.0411027
NMW0065*092	Bicyclo[2.2.1]heptan-2-ol, 1,7,7-trimethyl-, (1S-endo)-	Terpenoids	C10H18O	464-45-9	0.39236	0.401185	0.426739	0.350114	0.402393	0.391038	2.58785	2.80701	2.55155	2.50742	2.69396	2.14894	2.6002	1.94494	1.9274	2.00126	2.78221	1.81006	0.947406	0.877989	0.874195	0.949174	0.679027	0.904692	1.27898	1.46369	1.30544
KMW0357	Bicyclo[2.2.1]heptan-2-ol, 2,3,3-trimethyl-	Terpenoids	C10H18O	465-31-6	0.277438	0.289172	0.312721	0.227133	0.304464	0.236194	0.469834	0.606752	0.474388	0.474431	0.727206	0.526568	0.366322	0.334868	0.324184	0.331388	0.388832	0.305579	0.270177	0.226534	0.216722	0.231101	0.192886	0.268628	0.226458	0.300477	0.302041
D292	Bicyclo[2.2.1]heptane, 2-methyl-3-methylene-2-(4-methyl-3-pentenyl)-, (1S-endo)-	Terpenoids	C15H24	25532-78-9	0.188025	0.167619	0.179713	0.137087	0.173449	0.160881	0.245922	0.261351	0.239023	0.0213763	0.318298	0.25642	0.0255776	0.0226667	0.0221887	0.022184	0.0266551	0.0223	0.115549	0.108607	0.103177	0.105786	0.103163	0.123224	0.155263	0.192085	0.170986
WMW0201	Bicyclo[2.2.1]heptane, 7,7-dimethyl-2-methylene-	Terpenoids	C10H16	471-84-1	0.365407	0.373267	0.414844	0.380237	0.383892	0.357594	1.80907	1.86942	1.69853	1.90216	2.14238	1.83413	1.92751	1.80421	1.70227	1.65645	1.85177	1.6911	0.244082	0.226244	0.239478	0.238187	0.252572	0.226816	0.842196	0.912263	0.94691
XMW0889	Bicyclo[3.1.0]hex-2-ene, 4-methylene-1-(1-methylethyl)-	Terpenoids	C10H14	36262-09-6	0.322341	0.329438	0.364461	0.334416	0.337031	0.31464	1.24636	1.63284	1.47649	1.65221	1.87328	1.59086	1.35679	1.26496	1.18989	1.16015	1.26756	1.20682	0.214917	0.197217	0.210039	0.167566	0.219037	0.199037	0.7397	0.79436	0.828179
D276	Bicyclo[3.1.0]hex-3-en-2-one, 4-methyl-1-(1-methylethyl)-	Terpenoids	C10H14O	24545-81-1	0.050136	0.048609	0.0502679	0.0415024	0.0481121	0.0392446	0.0950365	0.149534	0.0877455	0.0909845	0.151316	0.0974334	0.12189	0.106018	0.0977301	0.111723	0.13683	0.0980393	0.0433041	0.0425477	0.0397732	0.0417714	0.0252222	0.0457874	0.0725785	0.0758988	0.0692405
D414	Bicyclo[3.1.0]hex-3-en-2-one, 5-(1-methylethyl)-	Ketone	C9H12O	36262-12-1	0.222327	0.23627	0.25461	0.196661	0.243241	0.197279	0.0245501	0.0285345	0.0242104	0.0259023	0.0339426	0.0259199	0.0309932	0.0274659	0.0268867	0.026881	0.0322988	0.0270217	0.179822	0.156908	0.148622	0.157127	0.123016	0.182261	0.241283	0.307963	0.269313
KMW0301*155	Bicyclo[3.1.0]hexan-2-ol, 2-methyl-5-(1-methylethyl)-, (1.alpha.,2.alpha.,5.alpha.)-	Terpenoids	C10H18O	17699-16-0	26.6668	25.5979	25.8331	25.305	25.6758	23.9659	262.377	285.515	249.869	264.556	318.338	253.125	260.16	235.145	221.613	217.793	256.934	215.01	29.9408	28.756	27.153	27.196	26.8797	30.4136	128.877	147.439	141.476
KMW0257*155	Bicyclo[3.1.0]hexan-2-ol, 2-methyl-5-(1-methylethyl)-, (1.alpha.,2.beta.,5.alpha.)-	Terpenoids	C10H18O	15537-55-0	26.6668	25.5979	25.8331	25.305	25.6758	23.9659	262.377	285.515	249.869	264.556	318.338	253.125	260.16	235.145	221.613	217.793	256.934	215.01	29.9408	28.756	27.153	27.196	26.8797	30.4136	128.877	147.439	141.476
WMW0204	Bicyclo[3.1.0]hexan-3-ol, 4-methylene-1-(1-methylethyl)-, acetate	Terpenoids	C12H18O2	3536-54-7	9.77358	9.59049	10.0373	9.26118	9.48122	8.51852	33.1681	38.0242	32.3663	32.9273	41.8583	32.2667	32.7382	28.8381	27.9082	27.6794	32.158	27.0386	8.43363	7.95783	7.63257	7.6662	7.78373	8.54188	17.1632	20.391	18.9557
KMW0178	Bicyclo[3.1.0]hexane, 4-methylene-1-(1-methylethyl)-	Terpenoids	C10H16	3387-41-5	12.152	11.9158	14.6892	12.111	13.8782	11.3035	41.2819	44.7577	38.6027	43.0424	51.3592	40.7066	46.9307	42.7432	40.9629	39.7408	46.0341	39.7065	8.39227	7.58836	7.79245	8.42135	8.89983	7.69908	22.8689	26.3036	25.811
XMW0933	Bicyclo[3.1.1]hept-2-en-6-ol, 2,7,7-trimethyl-, acetate, [1S-(1.alpha.,5.alpha.,6.beta.)]-	Ester	C12H18O2	50764-55-1	0.023505	0.0228134	0.0322645	0.0206722	0.0232298	0.0260915	0.154865	0.176188	0.151757	0.158368	0.200994	0.148472	0.211427	0.19272	0.191867	0.189118	0.217791	0.178187	0.0207317	0.0191396	0.0188558	0.0133378	0.0202658	0.0207442	0.048258	0.0565386	0.0539217
NMW0043	Bicyclo[3.1.1]hept-2-en-6-one, 2,7,7-trimethyl-	Terpenoids	C10H14O	473-06-3	0.115841	0.118461	0.127453	0.0963429	0.123619	0.0965578	0.206377	0.227617	0.198188	0.209908	0.272167	0.198084	0.0170237	0.0150863	0.115132	0.014765	0.0177408	0.109007	0.0910504	0.0766664	0.0705032	0.0759996	0.0675692	0.0926966	0.11294	0.145723	0.131539
XMW0468	Bicyclo[3.1.1]hept-2-ene, 2,6-dimethyl-6-(4-methyl-3-pentenyl)-	Terpenoids	C15H24	17699-05-7	5.41934	4.92372	5.29446	4.86524	5.3592	4.71539	7.12972	7.66105	7.37924	7.06693	9.21723	7.97801	8.82515	7.808	7.66872	7.27574	9.01048	7.19748	3.20796	2.98422	2.82696	2.87762	2.93708	3.44035	6.89504	6.07265	5.57541
XMW0632	Bicyclo[3.1.1]hept-2-ene, 3,6,6-trimethyl-	Terpenoids	C10H16	4889-83-2	0.153193	0.153428	0.171025	0.156134	0.159361	0.146606	0.742647	0.774528	0.696624	0.782302	0.888971	0.753087	0.793565	0.742096	0.704351	0.679946	0.765496	0.697637	0.0992318	0.0931632	0.0984606	0.0976478	0.103487	0.0933233	0.347404	0.374822	0.391389
NMW0073	Bicyclo[3.1.1]hept-2-ene-2-carboxaldehyde, 6,6-dimethyl-	Terpenoids	C10H14O	564-94-3	0.0488871	0.0436597	0.0453934	0.0349688	0.0466375	0.0342516	0.214356	0.257473	0.215253	0.221159	0.329923	0.147608	0.259013	0.236875	0.220397	0.216066	0.30379	0.202958	0.0262814	0.0222592	0.0196511	0.0196578	0.0196444	0.0293942	0.111999	0.116531	0.108493
NMW0151	Bicyclo[3.1.1]hept-2-ene-2-carboxylic acid, 6,6-dimethyl-	Terpenoids	C10H14O2	19250-17-0	0.0056103	0.00820282	0.00965212	0.00598525	0.00556953	0.00531678	0.0309805	0.0521801	0.0302657	0.0445759	0.042397	0.0302622	0.0355277	0.0301658	0.0283334	0.0287639	0.0315878	0.0293498	0.00233765	0.00302956	0.00194164	0.00186554	0.00192805	0.00351624	0.0152209	0.018952	0.0189683
NMW0074*039	Bicyclo[3.1.1]hept-2-ene-2-methanol, 6,6-dimethyl-	Terpenoids	C10H16O	515-00-4	0.0267077	0.0277496	0.0299341	0.0263074	0.0295601	0.0219558	0.1752	0.198754	0.175452	0.180341	0.258249	0.15618	0.134722	0.12763	0.114554	0.115422	0.163869	0.108474	0.014622	0.0118272	0.0122089	0.0125204	0.0125704	0.0153367	0.0494859	0.0506516	0.0554394
D286	Bicyclo[3.1.1]heptan-2-one, 6,6-dimethyl-	Ketone	C9H14O	24903-95-5	0.0131325	0.0130371	0.0142472	0.0116145	0.014308	0.0126208	0.0204843	0.0253004	0.0206203	0.021211	0.0320196	0.0230563	0.0198916	0.0130818	0.0133446	0.0132028	0.0194791	0.0160822	0.0131238	0.0114234	0.0112926	0.0116106	0.0105113	0.0133305	0.0124112	0.0152623	0.0138464
D307	Bicyclo[3.1.1]heptan-3-ol, 2,6,6-trimethyl-, (1.alpha.,2.beta.,3.alpha.,5.alpha.)-	Terpenoids	C10H18O	27779-29-9	0.0918435	0.0602314	0.061589	0.0513163	0.0670791	0.0644267	0.325673	0.330322	0.376536	0.357428	0.317385	0.194943	0.25366	0.239834	0.233148	0.221324	0.25413	0.228311	0.0433081	0.0376222	0.0317412	0.0342099	0.035959	0.0503544	0.102782	0.110328	0.0929538
WMW0042*153	Bicyclo[3.1.1]heptan-3-ol, 6,6-dimethyl-2-methylene-	Terpenoids	C10H16O	5947-36-4	0.52702	0.477581	0.496865	0.405796	0.483587	0.420811	2.19521	2.35247	2.2355	2.12217	2.56952	1.40165	2.30415	2.06949	1.98172	1.94237	1.87528	1.85165	0.276302	0.252616	0.244587	0.248125	0.241543	0.287309	0.991605	0.988387	0.958764
NMW0046*153	Bicyclo[3.1.1]heptan-3-ol, 6,6-dimethyl-2-methylene-, [1S-(1.alpha.,3.alpha.,5.alpha.)]-	Terpenoids	C10H16O	547-61-5	0.52702	0.477581	0.496865	0.405796	0.483587	0.420811	2.19521	2.35247	2.2355	2.12217	2.56952	1.40165	2.30415	2.06949	1.98172	1.94237	1.87528	1.85165	0.276302	0.252616	0.244587	0.248125	0.241543	0.287309	0.991605	0.988387	0.958764
XMW0531	Bicyclo[3.1.1]heptan-3-one, 2,6,6-trimethyl-, (1.alpha.,2.beta.,5.alpha.)-	Terpenoids	C10H16O	15358-88-0	0.129924	0.0771646	0.0791208	0.0663177	0.0890466	0.0961862	0.675747	0.69937	0.675301	0.517438	0.736139	0.346498	0.634152	0.573441	0.566231	0.539117	0.726926	0.523059	0.0560231	0.0491866	0.0434339	0.0429264	0.0519133	0.0684272	0.224086	0.23801	0.166428
D110	Bicyclo[3.1.1]heptan-3-one, 2-hydroxy-2,6,6-trimethyl-	Ketone	C10H16O2	10136-65-9	0.287146	0.313785	0.257741	0.326835	0.322478	0.282777	0.218603	0.267049	0.179856	0.237187	0.305263	0.225837	0.319577	0.29444	0.264923	0.262094	0.336372	0.268566	0.19808	0.140991	0.177915	0.138814	0.20564	0.156017	0.199599	0.21341	0.220268
XMW0004*119	Bicyclo[3.1.1]heptane, 6,6-dimethyl-2-methylene-, (1S)-	Terpenoids	C10H16	18172-67-3	50.3686	50.8965	55.0749	51.7567	51.9983	48.2171	170.219	185.308	160.147	177.402	212.918	168.214	194.766	177.109	170.034	164.791	191.372	164.842	36.945	35.366	36.3149	36.1186	38.1527	36.0745	87.2259	101.385	99.3296
XMW1381	Bicyclo[3.2.1]oct-2-ene, 3-methyl-4-methylene-	Terpenoids	C10H14	49826-53-1	0.137997	0.130178	0.134433	0.0825554	0.128513	0.108591	0.275827	0.440213	0.260328	0.263805	0.284361	0.254346	0.28839	0.247867	0.22295	0.237511	0.288182	0.229379	0.0737901	0.070645	0.0530814	0.0654505	0.0649336	0.0854682	0.240348	0.242746	0.192516
XMW0264*152	Bicyclo[4.4.0]dec-1-ene, 2-isopropyl-5-methyl-9-methylene-	Terpenoids	C15H24	150320-52-8	11.803	11.0665	10.8207	10.9126	11.1821	10.4269	32.2856	52.3341	30.7806	44.9829	43.5494	32.0266	52.1551	44.3413	42.6251	44.0729	52.9478	35.1035	10.4188	9.83316	9.24382	9.37074	9.35735	10.8357	19.8051	19.7623	18.3425
XMW0548	Bicyclo[7.2.0]undecane, 10,10-dimethyl-2,6-bis(methylene)-, [1S-(1R*,9S*)]-	Terpenoids	C15H24	136296-38-3	4.12284	3.52298	4.03144	3.46885	3.65143	3.36208	6.16511	7.18896	5.67089	6.53558	8.15091	5.14348	10.2471	9.14987	8.72224	8.14701	9.74825	7.85051	2.2152	2.03451	1.92753	2.00537	2.05704	2.28739	4.80092	5.09416	4.59953
WMW0013*151	Bicyclosesquiphellandrene	Terpenoids	C15H24	54324-03-7	0.432428	0.64351	0.481229	0.674578	0.710501	0.598937	1.34119	1.66719	1.13471	1.41513	2.03931	1.35058	0.0538436	0.0477157	0.0467095	0.0466996	0.0561117	0.0469439	0.261276	0.230998	0.215885	0.227017	0.235353	0.272999	0.621933	0.64702	0.592583
NMW0166	Biphenyl	Aromatics	C12H10	92-52-4	0.0175918	0.0150189	0.0166139	0.0141906	0.0159559	0.0142937	0.047745	0.0544344	0.0456124	0.0494954	0.0630556	0.0367246	0.0732018	0.0647153	0.0614666	0.0589667	0.0705742	0.0546294	0.00335805	0.00322517	0.00304539	0.00305021	0.00301473	0.00341108	0.233088	0.302989	0.261684
XMW0505	Biuret, 1-[(dimethylamino)methylene]-	Nitrogen compounds	C5H10N4O2	10264-58-1	0.0158653	0.0129877	0.00352074	0.0132108	0.0142101	0.016447	0.0183083	0.0234983	0.0188991	0.0185583	0.0229436	0.01334	0.0207256	0.0185466	0.0187641	0.0174797	0.0235846	0.0184727	0.00986327	0.0109999	0.00802515	0.0108524	0.00719035	0.0127712	0.0122746	0.0122369	0.013021
KMW0152	Butane, 1-isothiocyanato-	Others	C5H9NS	592-82-5	0.00611474	0.00636945	0.00680123	0.00656123	0.00662479	0.00496612	0.0295205	0.0297604	0.0272697	0.0310844	0.0354708	0.029953	0.0270552	0.0259169	0.0241584	0.0232141	0.0263856	0.0240199	0.00431794	0.00375914	0.00323314	0.00304185	0.00290518	0.00389435	0.0139982	0.0152142	0.0154971
XMW0622	Butanedioic acid, bis(2-methylpropyl) ester	Ester	C12H22O4	925-06-4	0.0515044	0.0459651	0.0517159	0.0459946	0.0490558	0.0442603	0.00470678	0.00547067	0.00464164	0.00496602	0.00650751	0.0049694	0.00594206	0.00526579	0.00515476	0.00515366	0.00619236	0.00518062	0.0262706	0.0252877	0.023867	0.0242216	0.0235853	0.027599	0.0592531	0.0695205	0.0634357
XMW0718	Butanedioic acid, methyl-, dimethyl ester	Ester	C7H12O4	1604-11-1	0.043286	0.0415509	0.0419328	0.0410755	0.0416774	0.0389019	0.291607	0.332576	0.277781	0.290418	0.371364	0.287981	0.304526	0.268749	0.256709	0.256661	0.294523	0.255102	0.0486004	0.0466772	0.0440753	0.044145	0.0436316	0.0493679	0.215661	0.244392	0.229646
NMW0793	Butanoic Acid, 3-hydroxy-3-methyl-	Acid	C5H10O3	625-08-1	0.362034	0.371937	0.399265	0.372505	0.375046	0.349315	1.3091	1.4129	1.22664	1.35434	1.62637	1.29039	1.48186	1.40298	1.29625	1.25537	1.45358	1.30409	0.281153	0.255475	0.262197	0.262569	0.275677	0.260613	0.653753	0.747169	0.735228
WMW0087	Butanoic Acid, 3-methylbutyl ester	Ester	C9H18O2	106-27-4	0.34805	0.334098	0.337169	0.330276	0.335116	0.312798	3.64412	4.01315	3.38555	3.74203	4.521	3.47515	3.67778	3.23618	3.13879	3.08491	3.43423	3.03643	0.390781	0.375317	0.354396	0.354957	0.350828	0.396952	1.72275	1.96229	1.84652
NMW0781	Butanoic Acid, 4-hydroxy-	Acid	C4H8O3	591-81-1	0.0490843	0.0488637	0.0500825	0.0466165	0.0467107	0.0450447	0.153864	0.159123	0.145388	0.160982	0.182435	0.147462	0.191938	0.179729	0.169169	0.164772	0.187431	0.165505	0.0108939	0.0104629	0.00987963	0.00989526	0.00978016	0.011066	0.0848621	0.0893658	0.0946546
KMW0591	Butanoic acid, 1,7,7-trimethylbicyclo[2.2.1]hept-2-yl ester, endo-	Ester	C14H24O2	13109-70-1	0.0496455	0.04537	0.0456729	0.0483011	0.0428669	0.0420416	0.059239	0.0769708	0.0640334	0.0645282	0.0777283	0.0590856	0.0593975	0.0543994	0.0532779	0.0489514	0.0615355	0.0507384	0.0414853	0.0386584	0.0330276	0.0365097	0.0353133	0.0437695	0.0473846	0.0396174	0.0508674
XMW1096	Butanoic acid, 1-ethenylhexyl ester	Ester	C12H22O2	16491-54-6	0.0433975	0.0359543	0.0422923	0.0339911	0.0397048	0.0339609	0.0586585	0.0620242	0.055142	0.0608807	0.0789003	0.0489878	0.0663087	0.0580812	0.0549506	0.0539768	0.065653	0.0509523	0.0335091	0.0309682	0.0304109	0.029673	0.030407	0.0345832	0.0447571	0.044673	0.0405805
XMW1079	Butanoic acid, 1-methylhexyl ester	Ester	C11H22O2	39026-94-3	0.112898	0.0800614	0.0772779	0.0643354	0.0801553	0.0703886	0.116945	0.144957	0.165004	0.113107	0.1628	0.110334	0.131796	0.110143	0.112237	0.110085	0.141955	0.106207	0.0769462	0.07107	0.0622476	0.064471	0.0552815	0.0821182	0.0981918	0.0961047	0.0746082
XMW1253	Butanoic acid, 1-methyloctyl ester	Ester	C13H26O2	69727-42-0	0.0661437	0.0634923	0.479687	0.0627659	0.0636857	0.0594445	0.721161	0.634883	0.738673	0.523737	0.73185	0.586051	0.419941	0.37695	0.368028	0.366506	0.554682	0.379933	0.0742644	0.0713257	0.0673497	0.0674563	0.0666717	0.0754372	0.47161	0.484338	0.389093
D388	Butanoic acid, 1-phenylethyl ester	Ester	C12H16O2	3460-44-4	0.0549502	0.0488069	0.0552482	0.0471648	0.049586	0.0459185	0.160127	0.186605	0.151847	0.16518	0.207091	0.124263	0.241769	0.213423	0.204016	0.1914	0.229817	0.181472	0.122984	0.11591	0.108446	0.112021	0.133419	0.122083	0.106493	0.120313	0.106904
w44	Butanoic acid, 2-butoxy-1-methyl-2-oxoethyl ester	Ester	C11H20O4	7492-70-8	0.00879209	0.00711169	0.00767143	0.00663211	0.00707328	0.00662205	0.0129366	0.0207485	0.0125821	0.0202089	0.02356	0.0133683	0.015615	0.0137265	0.0126768	0.0157486	0.0139325	0.0119217	0.00290353	0.0045728	0.00363194	0.00372534	0.00364628	0.00448827	0.0100126	0.0103565	0.00757644
D269*106	Butanoic acid, 2-methyl-, 2-methylpropyl ester	Ester	C9H18O2	2445-67-2	0.191869	0.0996329	0.108559	0.0883694	0.104658	0.100305	0.241391	0.24189	0.227385	0.232865	0.246301	0.146807	0.186658	0.163633	0.160058	0.16282	0.203919	0.160134	0.0645606	0.0692383	0.0578795	0.059228	0.057856	0.0873803	0.0822951	0.124277	0.1196
D284*126	Butanoic acid, 2-methyl-, 2-phenylethyl ester	Ester	C13H18O2	24817-51-4	0.0958911	0.0626603	0.0715361	0.0609547	0.0762172	0.0586756	0.062206	0.0655653	0.0636902	0.0774175	0.0944032	0.0512693	0.0495044	0.0431842	0.040521	0.0395931	0.0345761	0.0307396	0.0511932	0.0482404	0.0468817	0.0473565	0.0506771	0.0538822	0.0599641	0.0612021	0.045379
XMW1169*142	Butanoic acid, 2-methyl-, 3,7-dimethyl-2,6-octadienyl ester, (E)-	Ester	C15H26O2	68705-63-5	0.579399	0.488942	0.593967	0.531064	0.587122	0.535728	0.497318	0.6717	0.490936	0.542413	0.706789	0.493485	0.434614	0.385427	0.397847	0.344829	0.443608	0.349533	0.330339	0.318477	0.266473	0.281978	0.283663	0.387006	0.437492	0.546932	0.429466
KMW0424	Butanoic acid, 2-methyl-, hexyl ester	Ester	C11H22O2	10032-15-2	0.00530215	0.00513098	0.00495708	0.00446404	0.00503796	0.00418201	0.00793171	0.0103924	0.00903611	0.00803175	0.0115959	0.00807298	0.00102037	0.000904245	0.000885177	0.000884989	0.00106335	0.000889619	0.0046178	0.00441881	0.00423045	0.00440579	0.00420445	0.00458243	0.00546916	0.00610746	0.00570636
XMW0887	Butanoic acid, 2-methyl-, propyl ester	Ester	C8H16O2	37064-20-3	0.0161141	0.0158712	0.0178413	0.0166705	0.0161521	0.0154086	0.0763824	0.0797783	0.0701811	0.0792455	0.0913552	0.0768706	0.0804658	0.0754822	0.0701419	0.0682038	0.0776785	0.0719022	0.00834483	0.0077432	0.0106091	0.0103695	0.0104761	0.00781131	0.0364743	0.0384422	0.0403029
XMW1292	Butanoic acid, 2-methylpropyl ester	Ester	C8H16O2	539-90-2	0.00429521	0.00440959	0.00416392	0.0043334	0.00469064	0.00411694	0.0196194	0.0209156	0.018759	0.0213679	0.0242787	0.0207229	0.0216696	0.0197846	0.018786	0.0181649	0.0208835	0.0194981	0.000964508	0.000926342	0.000874705	0.000876089	0.000865899	0.00097974	0.010062	0.0105262	0.0109221
XMW1067	Butanoic acid, 2-pentenyl ester, (Z)-	Ester	C9H16O2	42125-13-3	6.08102	5.57889	6.23572	5.33	5.85447	4.49032	11.6425	10.5352	10.9738	11.8777	12.473	8.28497	0.89097	0.789568	0.772919	0.772755	0.9285	0.776798	4.06756	3.78321	3.65348	3.68516	3.82378	4.13488	5.78628	7.01221	5.92739
XMW1069	Butanoic acid, 3-hexenyl ester, (E)-	Ester	C10H18O2	53398-84-8	0.270145	0.172161	0.177824	0.149314	0.194742	0.199373	1.02003	1.03234	1.1967	1.13009	0.976366	0.596761	0.790295	0.742217	0.723178	0.687002	0.782525	0.712088	0.119248	0.104593	0.0927782	0.0947971	0.10982	0.145598	0.335182	0.459363	0.402873
KMW0366	Butanoic acid, 3-hexenyl ester, (Z)-	Ester	C10H18O2	16491-36-4	0.102137	0.110649	0.116788	0.101388	0.108649	0.0982946	0.140125	0.115693	0.126095	0.146466	0.170198	0.107112	0.119818	0.114135	0.102454	0.102207	0.118287	0.0947058	0.0664846	0.0582648	0.0618592	0.0622402	0.0638906	0.0647458	0.0579642	0.0558214	0.069187
KMW0151	Butanoic acid, 3-hydroxy-, ethyl ester	Ester	C6H12O3	5405-41-4	0.096226	0.0955778	0.107212	0.0984587	0.100459	0.094983	0.334543	0.334217	0.311861	0.351681	0.38944	0.321464	0.422731	0.395732	0.375342	0.361961	0.40496	0.368931	0.0358268	0.0332123	0.0348578	0.0351569	0.0367139	0.0348812	0.169693	0.205279	0.189456
D272*145	Butanoic acid, 3-methyl-, 2-methylbutyl ester	Ester	C10H20O2	2445-77-4	1.37694	1.24804	1.73023	1.19193	1.33633	1.16364	3.15774	2.88994	2.59939	3.23057	3.63467	2.18373	0.257503	0.228196	0.223384	0.223337	0.26835	0.224505	1.17056	1.0934	1.05226	1.06289	1.09239	1.19361	1.47112	1.83016	1.64741
XMW0981*126	Butanoic acid, 3-methyl-, 2-phenylethyl ester	Ester	C13H18O2	140-26-1	0.0958911	0.0626603	0.0715361	0.0609547	0.0762172	0.0586756	0.062206	0.0655653	0.0636902	0.0774175	0.0944032	0.0512693	0.0495044	0.0431842	0.040521	0.0395931	0.0345761	0.0307396	0.0511932	0.0482404	0.0468817	0.0473565	0.0506771	0.0538822	0.0599641	0.0612021	0.045379
D441	Butanoic acid, 3-methyl-, 3,7-dimethyl-2,6-octadienyl ester, (Z)-	Ester	C15H26O2	3915-83-1	0.150762	0.103304	0.116343	0.0826579	0.115695	0.111124	0.264486	0.312238	0.291987	0.259874	0.327608	0.179537	0.14952	0.136974	0.133641	0.131907	0.182852	0.139091	0.0742061	0.0735578	0.0593529	0.0628601	0.0552842	0.0954189	0.108138	0.103878	0.105425
D85	Butanoic acid, 3-methyl-, hexyl ester	Ester	C11H22O2	10032-13-0	0.382689	0.361729	0.382451	0.377001	0.385268	0.365495	0.564815	0.678017	0.535127	0.563543	0.728812	0.560743	0.0778609	0.0689996	0.0675446	0.0675302	0.0811407	0.0678835	0.352513	0.400667	0.366848	0.372892	0.309039	0.425411	0.326287	0.365439	0.326562
D147*110	Butanoic acid, 3-methyl-, phenylmethyl ester	Ester	C12H16O2	103-38-8	0.995136	0.864738	0.989994	0.854816	0.908976	0.826795	2.84232	3.28082	2.67885	2.8777	3.73096	2.23165	4.32265	3.831	3.65834	3.42601	4.09951	3.16455	14.8131	12.5917	13.7351	13.6839	14.1883	13.0449	4.65805	5.72235	4.91644
w31	Butanoic acid, 4-hexenyl ester, (Z)-	Ester	C10H18O2	69727-41-9	0.106855	0.0937068	0.093168	0.0807561	0.0955971	0.0817294	0.160786	0.217287	0.170867	0.161583	0.29157	0.17336	0.247615	0.214802	0.177114	0.1973	0.235159	0.188299	0.046724	0.018909	0.0366615	0.0374356	0.0360941	0.0203277	0.143693	0.16836	0.137323
XMW0304	Butanoic acid, 5-hexenyl ester	Ester	C10H18O2	108058-75-9	0.0835041	0.0534549	0.0548771	0.0452914	0.0600195	0.0574883	0.235548	0.231233	0.267037	0.331645	0.286751	0.17266	0.175914	0.156731	0.165626	0.148913	0.228283	0.154817	0.0377885	0.0339836	0.0278848	0.0297246	0.0321484	0.0451668	0.092822	0.095734	0.0811711
XMW0449*029	Butanoic acid, anhydride	Others	C8H14O3	106-31-0	0.468344	0.488962	0.526718	0.399105	0.506712	0.411359	0.775688	1.15871	0.785545	0.781125	1.30403	0.929073	0.62345	0.564162	0.541106	0.545046	0.633844	0.5181	0.385435	0.297173	0.279464	0.331459	0.262604	0.386751	0.461125	0.622772	0.562193
XMW1071	Butanoic acid, cyclopentyl ester	Ester	C9H16O2	6290-13-7	0.00618019	0.00628269	0.00678861	0.00403332	0.00629592	0.00371863	0.0090484	0.0117232	0.00894522	0.00914223	0.013305	0.00955895	0.00100868	0.000893883	0.000875034	0.000874848	0.00105117	0.000879425	0.00522064	0.00428304	0.00437074	0.00454982	0.00429982	0.00502035	0.00476126	0.00608263	0.00692045
KMW0500	Butanoic acid, phenylmethyl ester	Ester	C11H14O2	103-37-7	0.0312465	0.0334127	0.0373929	0.0303964	0.0343352	0.029962	0.0971678	0.111533	0.0923805	0.09675	0.131292	0.0945039	0.103181	0.0900307	0.0870283	0.0876394	0.101439	0.0845748	0.0113758	0.010954	0.00971426	0.0099131	0.00984696	0.0117567	0.0456668	0.0650954	0.0553582
KMW0511	Butyl benzoate	Ester	C11H14O2	136-60-7	0.0877546	0.078265	0.089698	0.0704048	0.0816043	0.0691875	0.262146	0.299913	0.246884	0.269415	0.338418	0.207555	0.403173	0.354792	0.341055	0.318896	0.37899	0.301805	0.0649237	0.0603109	0.0569477	0.0578509	0.0599999	0.0691572	0.159222	0.172818	0.151541
KMW0571	Butyl caprate	Ester	C14H28O2	30673-36-0	0.0337265	0.0238156	0.0149129	0.013157	0.0167829	0.0266358	0.0732473	0.0993182	0.0884044	0.0700496	0.0980234	0.0616134	0.054981	0.0485039	0.0502514	0.0476685	0.0680666	0.0479331	0.0250929	0.0252033	0.0205575	0.0212391	0.0148755	0.0306586	0.0261925	0.0256597	0.0332983
KMW0534	Butyl caprylate	Ester	C12H24O2	589-75-3	0.00247083	0.00237178	0.00239358	0.00234465	0.00237901	0.00222058	0.0161445	0.0178072	0.0151177	0.0163232	0.0211761	0.0131193	0.0232526	0.0202467	0.0200951	0.0187037	0.0232864	0.0184138	1.12405	0.991331	1.04426	1.04747	1.06502	1.04081	0.229716	0.29456	0.241787
WMW0218	Butylated Hydroxytoluene	Aromatics	C15H24O	128-37-0	4.40032	3.85354	4.42833	3.95374	4.09602	3.71082	4.2767	4.50839	4.03334	3.96053	5.37829	3.68743	2.5509	1.96752	1.92522	2.23097	2.78609	2.39649	0.65803	0.604395	0.591995	0.596912	0.592684	0.643302	2.59772	2.11668	1.95459
XMW0643	Butyramide, 2-cyano-2-ethyl-	Amine	C7H12N2O	18705-38-9	4.89775	4.80034	5.02754	4.63038	4.74635	4.24434	16.1953	18.5366	15.8132	16.1868	20.7023	15.8347	16.2548	14.3298	13.8265	13.695	15.9775	13.4572	3.9331	3.75376	3.58356	3.84411	3.89697	4.25376	8.41935	10.165	9.37371
XMW0271	Cadina-1(10),6,8-triene	Terpenoids	C15H22	1460-96-4	0.0679107	0.0648016	0.058474	0.0654868	0.0651269	0.0606713	0.0849085	0.0896956	0.0805318	0.0800412	0.10566	0.0729205	0.0520641	0.0423777	0.0405021	0.0452766	0.0568624	0.0472412	0.0128894	0.0114881	0.0114235	0.0119337	0.0116161	0.0128156	0.0484947	0.0433052	0.0399107
KMW0172	Camphene	Terpenoids	C10H16	79-92-5	1.09126	1.10484	1.22533	1.12766	1.13757	1.05944	4.65969	4.65384	4.34417	4.8385	6.3338	5.25134	4.95936	4.64008	4.37058	4.24238	4.71194	4.3704	0.720757	0.655708	0.698281	0.695315	0.741765	0.662657	2.45336	2.68731	2.72962
NMW0103	Caprolactam	Amine	C6H11NO	105-60-2	0.0369432	0.0389964	0.0421802	0.040754	0.041283	0.036792	0.0449631	0.0547745	0.0400617	0.049223	0.0526418	0.0428707	0.0547239	0.0506748	0.0454042	0.0448963	0.0432213	0.0461343	0.0350673	0.0354471	0.0322668	0.0341069	0.0353605	0.0399035	0.0377712	0.0307896	0.0434318
XMW0385	Carotol	Terpenoids	C15H26O	465-28-1	0.221066	0.195737	0.209144	0.2019	0.197578	0.182757	0.555489	0.846921	0.520818	0.726746	0.739371	0.548068	0.562922	0.481195	0.471823	0.47781	0.618912	0.608248	0.0827614	0.0851788	0.071356	0.0754116	0.0740746	0.0966404	0.329086	0.308498	0.286142
XMW1444*107	Carvenone	Terpenoids	C10H16O	499-74-1	0.398649	0.470159	0.504832	0.468147	0.453039	0.403009	1.12798	0.447898	0.316975	1.18014	1.52168	0.40159	1.1901	1.07346	0.936838	0.95592	1.17026	0.929421	0.210208	0.179911	0.195106	0.190449	0.216233	0.202358	0.605514	0.652407	0.674724
KMW0388	Carveol	Terpenoids	C10H16O	99-48-9	0.0836117	0.0457242	0.0458307	0.035986	0.0511302	0.0494166	0.305157	0.30097	0.354789	0.313678	0.351168	0.168429	0.28499	0.26906	0.270289	0.25624	0.354493	0.246763	0.0428445	0.0326337	0.026457	0.0265037	0.0311536	0.0457415	0.137495	0.153313	0.127619
KMW0444	Carvone	Terpenoids	C10H14O	99-49-0	0.163288	0.150111	0.147159	0.148016	0.149448	0.142013	0.0941519	0.177053	0.123266	0.130629	0.164166	0.0835387	0.101471	0.132891	0.123858	0.0876189	0.126247	0.120199	0.148716	0.154663	0.144623	0.144307	0.130191	0.164831	0.137925	0.155415	0.136735
D452	Carvone oxide, trans-	Heterocyclic compound	C10H14O2	39903-97-4	0.497205	0.466754	0.516829	0.44721	0.455068	0.405044	1.55663	1.73528	1.49309	1.49708	1.86518	1.45806	2.35515	2.01603	2.00292	2.00562	2.19679	1.94555	0.120681	0.113102	0.111393	0.107092	0.149188	0.119187	0.95614	0.853837	0.803141
KMW0565	Caryophyllene	Terpenoids	C15H24	87-44-5	58.8879	54.4206	55.7089	54.2336	55.8816	51.06	6.16088	7.16076	114.375	6.5002	8.51793	106.953	7.77778	116.148	112.151	104.869	125.737	102.124	35.7552	33.0258	31.5591	32.3826	32.642	36.9354	72.3953	83.879	75.9445
KMW0643	Caryophyllene oxide	Terpenoids	C15H24O	1139-30-6	0.820447	0.630813	0.664991	0.585935	0.684943	0.637197	1.32605	1.69301	1.43799	1.31417	1.70852	1.05179	1.39269	1.22482	1.2211	1.23664	1.62354	1.23883	0.383771	0.394536	0.291983	0.326853	0.269801	0.49971	0.577433	0.686274	0.731091
XMW0389	Caryophyllenyl alcohol	Terpenoids	C15H26O	913176-41-7	0.0242611	0.0173755	0.0180147	0.0167063	0.0168101	0.0174523	0.0367637	0.0410284	0.0388491	0.0363719	0.0391279	0.0249103	0.0202426	0.0188205	0.0183304	0.0162546	0.02336	0.0170836	0.00782492	0.00832849	0.0085519	0.0078206	0.00636137	0.00964436	0.0140346	0.0131824	0.0116014
NMW0081	Catechol	Phenol	C6H6O2	120-80-9	0.106717	0.129832	0.137239	0.123267	0.121382	0.107617	0.303356	0.304572	0.327025	0.314905	0.394982	0.193128	0.31388	0.297171	0.237094	0.266931	0.302207	0.228978	0.0741621	0.0699201	0.0770709	0.0729378	0.0759709	0.0674548	0.158531	0.15789	0.182479
NMW0140	Cathinone	Ketone	C9H11NO	71031-15-7	0.015113	0.012398	0.014326	0.0121435	0.0146731	0.0109173	0.024281	0.0344253	0.0239514	0.0277904	0.0414128	0.0275386	0.02035	0.0185406	0.0173815	0.0165423	0.02169	0.0176197	0.0078786	0.00775502	0.00607782	0.00510152	0.00718967	0.0102171	0.0140896	0.0183484	0.0144356
WMW0223	Cedrene	Terpenoids	C15H24	11028-42-5	8.51853	7.81676	8.16173	7.74422	8.04809	7.31789	0.951678	1.10613	0.938508	1.00409	1.31577	1.00478	1.20144	1.06471	1.04226	1.04203	1.25205	1.04749	5.51566	5.10154	4.88915	4.98991	5.00046	5.64696	9.80392	11.3479	10.42
NMW0315	Chamazulene	Terpenoids	C14H16	529-05-5	0.0284414	0.0238064	0.0225956	0.022849	0.0221128	0.0195644	0.0152524	0.0189836	0.0143613	0.015098	0.020139	0.0147676	0.0119553	0.0111201	0.0103027	0.0102566	0.0116145	0.00993558	0.0180596	0.015939	0.0154103	0.0162056	0.0155853	0.0184757	0.0186554	0.0200146	0.0135907
NMW0285	CinnamAldehyde, .alpha.-pentyl-	Aldehyde	C14H18O	122-40-7	0.0424466	0.0262741	0.0277896	0.0243122	0.030637	0.0304378	0.0886061	0.0743078	0.0968423	0.0876799	0.0714299	0.0613491	0.0518105	0.0481867	0.0473011	0.0451048	0.0619367	0.0461144	0.0306592	0.0309054	0.0227495	0.0249344	0.024345	0.0331321	0.0247925	0.0242157	0.0231125
KMW0342	Citronellal	Terpenoids	C10H18O	106-23-0	0.0765982	0.0814559	0.0873419	0.0645291	0.0843469	0.070538	0.17622	0.231623	0.179081	0.179612	0.288965	0.203366	0.108159	0.0996019	0.0943671	0.0948286	0.120005	0.0888047	0.0764248	0.0661001	0.0650671	0.0669789	0.0574915	0.0731968	0.0847921	0.113258	0.114901
KMW0585	Citronellyl isobutyrate	Ester	C14H26O2	97-89-2	1.27898	1.34304	1.20518	1.34409	1.23916	1.31589	1.3432	1.65468	1.2666	1.48999	1.73387	1.35047	2.78745	2.50535	2.25258	2.3241	2.85312	2.42293	0.493297	0.43326	0.417272	0.442565	0.443558	0.509902	1.51052	1.32444	1.24118
D282	Citronellyl tiglate	Terpenoids	C15H26O2	24717-85-9	0.15193	0.141043	0.153763	0.146766	0.145367	0.117749	0.20599	0.246144	0.207287	0.203672	0.246835	0.180783	0.179575	0.174886	0.146454	0.155502	0.188985	0.141225	0.118074	0.109446	0.0936595	0.100506	0.0983403	0.132119	0.156726	0.15998	0.131859
KMW0522*146	Copaene	Terpenoids	C15H24	3856-25-5	0.382229	0.330851	0.374496	0.328211	0.345531	0.305675	1.46271	1.70974	1.36935	1.51879	1.91823	1.08056	2.21857	1.95675	1.90929	1.7521	2.11239	1.62522	0.423784	0.39818	0.396373	0.380089	0.37887	0.454161	0.889157	0.957598	0.844877
KMW0614*066	Cubenene	Terpenoids	C15H24	29837-12-5	39.0821	32.7287	30.7909	33.3919	41.8541	32.3854	47.6797	58.493	43.9606	51.0031	62.3424	49.6727	35.3391	31.3553	30.4296	25.6244	30.3941	24.0292	29.9238	30.4332	29.2216	26.6863	27.0357	30.7313	28.5677	38.7133	35.9373
NMW0318	Curcumenol	Terpenoids	C15H22O2	19431-84-6	0.0430758	0.0316996	0.0300687	0.0255481	0.0184885	0.0289342	0.0384835	0.0438874	0.0407709	0.0384786	0.0461617	0.0165886	0.0537569	0.0448207	0.043756	0.0437136	0.0608354	0.0419349	0.0695735	0.0652806	0.0606375	0.0629485	0.0600696	0.0697595	0.0401025	0.039118	0.0313104
XMW1036	Cyclobuta[1,2:3,4]dicyclooctene, 1,2,5,6,6a,6b,7,8,11,12,12a,12b-dodecahydro-, (6a.alpha.,6b.beta.,12a.alpha.,12b.beta.)-	Hydrocarbons	C16H24	61277-44-9	0.088418	0.0555738	0.0768557	0.0682533	0.075513	0.0732973	0.211952	0.231209	0.240659	0.265171	0.351867	0.469598	0.39193	0.393206	0.381985	0.348664	0.38398	0.369748	0.0502348	0.0479279	0.0450236	0.0448211	0.0363838	0.0556198	0.207005	0.273345	0.282518
XMW1055	Cyclobutanecarbonitrile, 3,3-dimethyl-	Nitrogen compounds	C7H11N	53783-86-1	0.0304403	0.0299073	0.0332138	0.0311058	0.0320881	0.0301215	0.106154	0.109903	0.0994955	0.110557	0.126327	0.101415	0.132338	0.124532	0.118365	0.112895	0.12891	0.114459	0.0126473	0.00843226	0.00835671	0.0089494	0.00932261	0.0111162	0.0562836	0.0618677	0.06343
XMW0396	Cyclobutanecarboxylic acid chloride	Halogenated hydrocarbons	C5H7ClO	5006-22-4	0.0246499	0.0242743	0.0201544	0.00350717	0.0238164	0.0223831	0.00371739	0.0043207	0.0220118	0.0239998	0.0051396	0.0231161	0.00469301	0.0041589	0.0231214	0.0226613	0.0244535	0.0235074	0.0246942	0.0232774	0.0226532	0.0227946	0.0193388	0.0236921	0.0205486	0.0230687	0.023897
D348	Cyclobutaneethanol, 1-methyl-2-(1-methylethenyl)-, cis-	Alcohol	C10H18O	30820-22-5	0.45283	0.270667	0.281477	0.230343	0.316356	0.307784	1.50324	1.42179	1.50671	1.7196	1.27641	0.718274	1.0683	0.981841	0.985767	0.908748	1.40525	0.96105	0.196641	0.170087	0.144162	0.151207	0.172383	0.236683	0.533488	0.532411	0.460322
XMW0519	Cyclobutanespiro-2'-bicyclo[1.1.0]butane-4'-spirocyclobutane	Hydrocarbons	C10H14	76308-11-7	6.55311	6.48966	7.34063	6.70671	6.87081	6.48243	21.1259	21.1026	19.7258	22.042	24.4214	20.0846	26.854	25.142	23.6718	22.8595	25.4219	23.3822	2.37477	1.80179	1.87416	1.92048	2.02232	2.20183	12.5879	13.7467	13.9505
XMW0039	Cycloheptanone, 3-methyl-	Ketone	C8H14O	933-17-5	0.011753	0.0112819	0.0113856	0.0111528	0.0113163	0.0105627	0.0853027	0.0892959	0.0824724	0.0862379	0.102127	0.0853744	0.0880808	0.0807242	0.0748816	0.0740514	0.088402	0.0734269	0.013196	0.0126738	0.0119673	0.0119863	0.0118468	0.0134044	0.0634757	0.0597714	0.0652566
WMW0207	Cyclohexane, 1-(1,5-dimethylhexyl)-4-methyl-	Hydrocarbons	C15H30	29799-19-7	0.133746	0.123717	0.118132	0.124163	0.124948	0.1139	0.164095	0.180746	0.148699	0.165473	0.210104	0.145346	0.175032	0.154103	0.172245	0.147038	0.167735	0.200057	0.0826301	0.0849199	0.0758714	0.0774259	0.082982	0.0868971	0.122293	0.127116	0.123193
XMW1472	Cyclohexane, 1-ethyl-2-propyl-	Hydrocarbons	C11H22	62238-33-9	0.0244296	0.0248025	0.0267262	0.019067	0.0260776	0.0201762	0.0449289	0.0547998	0.0453667	0.0453133	0.0645639	0.0441484	0.0393532	0.0361844	0.0357233	0.0366365	0.0459357	0.0332683	0.0236423	0.0188569	0.0181058	0.0195955	0.0162947	0.0227646	0.0216824	0.0264819	0.0294112
XMW0709	Cyclohexane, 1-methylene-4-(1-methylethenyl)-	Terpenoids	C10H16	499-97-8	5.2354	5.13944	5.50653	5.34216	5.06895	4.77229	11.9882	12.6343	11.1107	12.4982	13.4786	11.9437	13.7447	12.4016	11.6423	11.4761	12.4234	11.6562	2.19337	2.49978	2.12864	2.32514	2.57145	2.60386	6.74709	6.69551	6.56008
D451	Cyclohexanecarboxamide, N-ethyl-5-methyl-2-(1-methylethyl)-	Amine	C13H25NO	39711-79-0	0.010881	0.0089068	0.00867973	0.00872587	0.00862443	0.00819958	0.00569939	0.00657314	0.00533415	0.0055607	0.00683739	0.00517898	0.00444142	0.00408489	0.00366025	0.00387739	0.00475773	0.00380388	0.00496029	0.0054219	0.00444881	0.00457568	0.00465425	0.0054772	0.00696621	0.00736538	0.00556088
D218	Cyclohexanecarboxylic Acid	Acid	C7H12O2	98-89-5	0.00655923	0.00649858	0.00680414	0.00478751	0.00700244	0.00759088	0.0080769	0.0099104	0.00614368	0.0109137	0.0116319	0.00945797	0.00516457	0.00473088	0.00349118	0.00459533	0.00698134	0.00524759	0.00653425	0.00410772	0.00391845	0.00349905	0.00354983	0.00457823	0.00693286	0.00825587	0.00647635
KMW0321	Cyclohexanecarboxylic acid, methyl ester	Ester	C8H14O2	4630-82-4	0.144382	0.139595	0.100923	0.14367	0.137491	0.124192	0.271788	0.279494	0.251798	0.2787	0.299853	0.272414	0.229097	0.208146	0.191498	0.191278	0.204851	0.196541	0.0647197	0.0646032	0.0612323	0.0610621	0.0685189	0.0684551	0.131454	0.138127	0.133619
NMW0186	Cyclohexanepropanoic Acid, 2-propenyl ester	Ester	C12H20O2	2705-87-5	0.316105	0.272397	0.308487	0.280952	0.285133	0.259666	0.426486	0.462856	0.417129	0.42491	0.0346045	0.470958	0.0315977	0.0280015	0.0274111	0.42459	0.523035	0.0275486	0.187076	0.138145	0.12669	0.167558	0.170518	0.20156	0.273508	0.330692	0.292582
XMW0228	Cyclohexanol, 1-ethenyl-	Alcohol	C8H14O	1940-19-8	0.0829494	0.0835672	0.0860829	0.08013	0.0793502	0.0762793	0.164112	0.184811	0.154202	0.166049	0.206111	0.143237	0.193548	0.172751	0.165753	0.163254	0.186169	0.160745	0.0507405	0.0487002	0.0482937	0.0479232	0.0484389	0.0491336	0.104347	0.116378	0.110984
NMW0129	Cyclohexanol, 1-methyl-4-(1-methylethenyl)-, acetate	Ester	C12H20O2	10198-23-9	0.599948	0.506885	0.634192	0.573089	0.575536	0.521541	2.27088	2.57254	2.13811	2.30648	2.94539	2.29162	2.78429	2.45431	2.80597	2.33885	2.68591	2.34633	0.256419	0.190403	0.14524	0.18283	0.163611	0.208101	1.26839	1.12421	1.02796
D440	Cyclohexanol, 1-methyl-4-(1-methylethyl)-, cis-	Terpenoids	C10H20O	3901-95-9	0.159715	0.165109	0.178931	0.128708	0.17386	0.138906	0.369449	0.488047	0.377298	0.376067	0.597975	0.419704	0.363436	0.332614	0.318121	0.322223	0.367954	0.300026	0.096606	0.291058	0.271885	0.135125	0.11264	0.336964	0.17772	0.241548	0.241731
D439	Cyclohexanol, 1-methyl-4-(1-methylethyl)-, trans-	Terpenoids	C10H20O	3901-93-7	0.0463809	0.0434885	0.0439844	0.0426984	0.0429998	0.036248	0.0386954	0.042866	0.0364243	0.0367585	0.0505074	0.0379731	0.0471727	0.0429136	0.0380068	0.0388497	0.036893	0.0363729	0.0421101	0.0401253	0.0372442	0.0380509	0.0381067	0.043947	0.031761	0.0321721	0.0291455
NMW0075*093	Cyclohexanol, 1-methyl-4-(1-methylethylidene)-	Terpenoids	C10H18O	586-81-2	0.0770269	0.079342	0.0849171	0.0618121	0.079879	0.0613892	0.060438	0.0889382	0.065699	0.0594975	0.167357	0.126154	0.0750746	0.0675451	0.0656411	0.0649853	0.0774481	0.0619243	0.0576067	0.0500416	0.0498084	0.0503619	0.0468637	0.0595035	0.0657915	0.0886762	0.061507
NMW0142*081	Cyclohexanol, 1-methyl-4-(1-methylethylidene)-, acetate	Ester	C12H20O2	10235-63-9	0.355956	0.332996	0.3809	0.329061	0.351834	0.307206	1.53199	1.81335	1.47242	1.53905	2.05807	1.51006	1.57715	1.41133	1.36971	1.35684	1.58019	1.32629	0.125545	0.118304	0.109519	0.10941	0.107279	0.129664	0.487458	0.620705	0.604194
XMW0411	Cyclohexanol, 2,6-dimethyl-	Alcohol	C8H16O	5337-72-4	0.0781904	0.061165	0.0661131	0.0495134	0.0623799	0.0647597	0.0950603	0.150539	0.0940804	0.0973124	0.166624	0.119495	0.00933209	0.00827	0.00809562	0.00809389	0.00972518	0.00813624	0.0463945	0.0524359	0.0382722	0.0399649	0.0370401	0.0622456	0.0597216	0.0803326	0.0705995
XMW0122	Cyclohexanol, 2-methyl-3-(1-methylethenyl)-, (1.alpha.,2.alpha.,3.alpha.)-	Alcohol	C10H18O	54244-81-4	0.246982	0.266895	0.292043	0.208009	0.275282	0.202309	0.273704	0.393064	0.294718	0.277505	0.526971	0.42586	0.229145	0.20379	0.184186	0.203652	0.239151	0.196475	0.213434	0.183576	0.160577	0.186507	0.157415	0.209747	0.204647	0.275389	0.221297
XMW0642	Cyclohexanol, 3,5-dimethyl-	Alcohol	C8H16O	5441-52-1	0.0130905	0.0117629	0.0146345	0.0124211	0.0111	0.0115206	0.0054299	0.00446823	0.00531604	0.00537346	0.00462247	0.00349323	0.00487701	0.000740316	0.000724705	0.00384126	0.000870582	0.000728342	0.00788797	0.00845903	0.00878543	0.00810638	0.00842264	0.00923632	0.00860451	0.00883056	0.00773501
XMW0165	Cyclohexanol, 3-ethenyl-3-methyl-2-(1-methylethenyl)-6-(1-methylethyl)-, [1R-(1.alpha.,2.alpha.,3.beta.,6.alpha.)]-	Terpenoids	C15H26O	35727-45-8	0.0443166	0.0393954	0.0450289	0.0414021	0.0427109	0.0310745	0.0507	0.0665484	0.047715	0.0527901	0.0731486	0.0574674	0.043158	0.0492007	0.0472523	0.0439123	0.0480885	0.044421	0.0217115	0.0214824	0.0176396	0.0185783	0.0171812	0.0248962	0.0335848	0.0337132	0.032845
KMW0392*095	Cyclohexanol, 5-methyl-2-(1-methylethyl)-, (1.alpha.,2.alpha.,5.alpha.)-	Terpenoids	C10H20O	491-02-1	0.11032	0.115879	0.122538	0.106331	0.116576	0.108865	1.23247	1.41601	1.24481	1.25271	1.32891	1.13404	0.928452	1.03678	1.0154	0.84279	0.917261	0.810171	0.0606384	0.0542122	0.0572771	0.0551287	0.0547714	0.0601811	0.350467	0.409467	0.505034
KMW0334	Cyclohexanone, 5-methyl-2-(1-methylethyl)-	Terpenoids	C10H18O	10458-14-7	0.000429609	0.000412387	0.00211827	0.00040767	0.000413644	0.00193048	0.00711717	0.00638883	0.00666296	0.00689926	0.00928274	0.0103594	0.01025	0.00880756	0.00993862	0.00928585	0.0108777	0.00828192	0.00316953	0.00317798	0.00491286	0.00321695	0.00254061	0.00360103	0.0048886	0.00545262	0.00618911
NMW0062*112	Cyclohexanone, 5-methyl-2-(1-methylethyl)-, cis-	Terpenoids	C10H18O	491-07-6	0.00156631	0.0104701	0.00983473	0.00148632	0.0107132	0.0103469	0.0165651	0.00183109	0.0206455	0.0154923	0.0191942	0.00831655	0.0127559	0.0105751	0.0154201	0.011345	0.013302	0.0162114	0.00922625	0.0145792	0.0114996	0.0117498	0.010988	0.0143232	0.00855974	0.0085373	0.0089568
KMW0313*112	Cyclohexanone, 5-methyl-2-(1-methylethyl)-, trans-	Terpenoids	C10H18O	89-80-5	0.00156631	0.0104701	0.00983473	0.00148632	0.0107132	0.0103469	0.0165651	0.00183109	0.0206455	0.0154923	0.0191942	0.00831655	0.0127559	0.0105751	0.0154201	0.011345	0.013302	0.0162114	0.00922625	0.0145792	0.0114996	0.0117498	0.010988	0.0143232	0.00855974	0.0085373	0.0089568
KMW0296	Cyclohexene, 1-methyl-4-(1-methylethylidene)-	Terpenoids	C10H16	586-62-9	66.7975	63.7982	76.122	69.9981	71.0516	59.2777	3.99455	4.64285	3.93927	4.21457	5.52281	4.21744	5.04292	4.46898	4.37475	4.37382	5.25534	4.3967	34.8028	33.0081	31.3037	31.6192	31.7267	22.6474	201.554	229.784	226.484
XMW0801	Cyclohexene, 3,4-diethenyl-1,6-dimethyl-	Hydrocarbons	C12H18	61142-14-1	0.0133918	0.0127228	0.0128626	0.0124663	0.0123486	0.0113685	0.0241006	0.0270331	0.0245686	0.024433	0.0287619	0.0250683	0.0367766	0.0330743	0.0320388	0.0341873	0.031809	0.0314385	0.0140846	0.0135713	0.0122979	0.00907981	0.0126418	0.0144101	0.017195	0.0192467	0.0166549
D293	Cyclohexene, 4-[(1E)-1,5-dimethyl-1,4-hexadien-1-yl]-1-methyl-	Terpenoids	C15H24	25532-79-0	21.6738	22.282	33.2771	21.9041	21.0911	20.0303	25.0714	24.7983	24.1976	22.3433	31.2537	22.3474	14.1802	10.8417	10.6763	13.138	16.7535	14.7516	6.67435	6.16141	5.91971	6.0342	6.05838	6.68796	15.244	22.7066	20.935
XMW0417	Cyclohexene, 4-methyl-1-(1-methylethenyl)-	Hydrocarbons	C10H16	586-67-4	5.6215	5.39616	5.44575	5.33442	5.41259	5.05214	71.8147	80.3399	67.7779	74.037	89.7653	69.6931	52.281	59.2346	44.6944	44.3788	62.8118	42.8892	6.31167	6.06191	5.724	5.73305	5.66637	6.41134	33.4534	28.5888	34.002
XMW1247	Cyclohexene, 6-(2-butenylidene)-1,5,5-trimethyl-, (E,Z)-	Hydrocarbons	C13H20	71186-24-8	0.141899	0.129527	0.150315	0.129136	0.140388	0.111607	0.277984	0.470403	0.24723	0.315253	0.406743	0.288255	0.160902	0.144022	0.137667	0.132846	0.162971	0.137945	0.0611159	0.0576736	0.0440122	0.0416654	0.0552316	0.0783157	0.160119	0.193119	0.164719
XMW1379	Cyclooctane, 1,5-dimethyl-2,6-bis(methylene)-	Hydrocarbons	C12H20	74301-13-6	0.0281898	0.0250402	0.0258553	0.0186005	0.0270633	0.0215449	0.203031	0.242278	0.0313664	0.193794	0.27695	0.12487	0.215726	0.187344	0.139035	0.141354	0.245942	0.118829	0.0925956	0.0878001	0.0823562	0.0880867	0.0517202	0.0741875	0.123962	0.132433	0.121477
w01	Cyclooctyl Alcohol	Alcohol	C8H16O	696-71-9	0.175433	0.106361	0.103948	0.0827718	0.112622	0.107153	0.191698	0.205589	0.235999	0.173553	0.223777	0.102939	0.12882	0.108935	0.111291	0.116423	0.142545	0.116586	0.100229	0.103633	0.0786741	0.0823356	0.074566	0.145725	0.0937629	0.090176	0.0844884
D285	Cyclopentaneacetic acid, 3-oxo-2-pentyl-, methyl ester	Ester	C13H22O3	24851-98-7	0.0353204	0.0222765	0.027529	0.0203901	0.0302433	0.031197	0.0510967	0.0711344	0.0655365	0.0493062	0.0604423	0.0290519	0.0330811	0.0221362	0.0258625	0.0209627	0.0398172	0.0283625	0.0182143	0.0171123	0.0128608	0.0142324	0.0132325	0.026238	0.0191479	0.023198	0.0267626
XMW1058	Cyclopentanol, acetate	Ester	C7H12O2	933-05-1	0.475507	0.472884	0.540521	0.492311	0.504488	0.478249	1.7298	1.80401	1.63505	1.83257	2.07463	1.68099	1.88678	1.76478	1.94641	1.62375	2.1302	1.6363	0.174519	0.162333	0.166799	0.172252	0.182256	0.164827	0.913536	0.995138	1.03013
D390	Cyclopentanone, 2-(2-hexenyl)-	Ketone	C11H18O	34687-46-2	0.245603	0.235972	0.260775	0.231342	0.238167	0.204255	1.16289	1.31255	1.10987	1.18044	1.49681	1.16995	1.42974	1.26228	1.23055	1.21774	1.37649	1.21144	0.0819497	0.076821	0.076495	0.0741366	0.0804091	0.0832076	0.44982	0.588652	0.529753
WMW0099	Cyclopentene, 1-butyl-	Hydrocarbons	C9H16	2423-01-0	0.949416	0.944798	1.08258	0.979852	1.01042	0.952967	3.42912	3.57879	3.23827	3.6273	4.11658	3.32355	3.73243	3.46825	3.34463	3.19606	4.21372	3.21557	0.347727	0.322747	0.334695	0.342197	0.362467	0.326966	1.82976	1.98495	2.04188
XMW0954	Cyclopropanecarboxylic Acid, 2,2-dimethyl-3-(2-methyl-1-propenyl)-, (1R-trans)-	Terpenoids	C10H16O2	4638-92-0	9.68739	9.42115	9.75192	9.14782	9.27902	8.46016	34.2934	39.2053	33.2006	33.9168	42.6112	33.1465	33.0082	29.3678	28.2234	28.1574	32.2855	27.301	8.32755	7.85222	7.6191	7.6244	7.67765	8.44362	17.3973	20.4423	18.983
KMW0217	D-Limonene	Terpenoids	C10H16	5989-27-5	7.87907	7.78048	8.31358	7.67697	7.82882	7.26457	39.6648	43.8664	39.1807	40.9236	49.4488	38.358	56.9583	50.1846	48.9528	47.9456	55.8164	47.3059	3.96884	3.57113	3.63676	3.65252	3.85986	3.76116	17.0986	21.3265	19.3446
NMW0093*140	D-Verbenone	Terpenoids	C10H14O	18309-32-5	1.24568	1.1827	1.11955	1.11354	1.14503	1.04159	0.14837	0.17245	0.146316	0.156542	0.205134	0.156648	0.187309	0.165991	0.162491	0.162457	0.195199	0.163307	1.17084	1.14493	1.04085	1.09742	1.04537	1.22183	0.732121	0.80977	0.782602
XMW1351	Dauca-4(11),8-diene	Terpenoids	C15H24	395070-76-5	5.86371	4.93224	5.67795	5.02359	5.27704	4.86988	5.85537	7.03073	7.89656	6.08918	7.55491	4.6892	4.90443	4.58796	4.28733	5.38135	6.27765	5.02997	4.71761	4.14993	3.76208	4.24863	4.03922	4.56722	4.82904	5.36454	4.99049
D215	Daucol	Terpenoids	C15H26O2	887-08-1	0.0181873	0.0149853	0.0148331	0.0133812	0.00110428	0.00103074	0.00115356	0.00134078	0.0011376	0.0012171	0.0015949	0.0129563	0.0079037	0.00743471	0.00705839	0.00631544	0.00151766	0.00769126	0.00805232	0.0100955	0.00689186	0.00670957	0.00696037	0.0115913	0.0101366	0.0124555	0.00931664
KMW0399	Decanal	Aldehyde	C10H20O	112-31-2	0.0936301	0.0840946	0.0886496	0.0602421	0.0911604	0.069361	0.203957	0.284575	0.20859	0.201975	0.32327	0.207518	0.138375	0.124725	0.129765	0.124977	0.158174	0.117827	0.0725707	0.0631676	0.0547034	0.0595169	0.0489936	0.0804776	0.0658092	0.0951071	0.0989241
KMW0208	Decane	Hydrocarbons	C10H22	124-18-5	0.444337	0.356742	0.369482	0.315795	0.367486	0.349816	0.520546	0.532028	0.601847	0.501747	0.543891	0.437487	0.54018	0.476931	0.346794	0.347889	0.454206	0.38711	0.166413	0.239075	0.149674	0.150979	0.142882	0.304551	0.33703	0.382245	0.309864
XMW0099	Decane, 2,3,5-trimethyl-	Hydrocarbons	C13H28	62238-11-3	0.141251	0.135589	0.982137	0.134037	0.136002	0.126944	1.50273	1.58666	1.53737	1.1295	1.53785	1.21549	0.901079	0.794725	0.791371	0.965728	1.14991	0.783211	0.158592	0.152317	0.143826	0.144054	0.142378	0.161097	0.978217	1.03464	0.830895
XMW0611	Decane, 2,3,6-trimethyl-	Hydrocarbons	C13H28	62238-12-4	0.00511305	0.00540489	0.0056666	0.00448902	0.005696	0.00499982	0.0106249	0.0139303	0.010432	0.0105848	0.0144003	0.0100311	0.000850669	0.000753855	0.000737958	0.000737801	0.00697902	0.000741662	0.00418067	0.00429138	0.00341074	0.00411606	0.00343918	0.00473543	0.00486341	0.00736445	0.00599236
XMW1399	Decane, 2,5,9-trimethyl-	Hydrocarbons	C13H28	62108-22-9	0.00338709	0.00469651	0.00394013	0.00267067	0.00353205	0.00270431	0.0069474	0.00903039	0.00677293	0.00708876	0.0105931	0.00762697	0.000534562	0.000473723	0.000463734	0.000463635	0.000557079	0.000466061	0.00246383	0.0024249	0.00223617	0.00229935	0.00212173	0.00279088	0.00433597	0.00574173	0.00587435
XMW0237*041	Decane, 5-ethyl-5-methyl-	Hydrocarbons	C13H28	17312-74-2	0.0422262	0.036476	0.0409268	0.0400237	0.0407066	0.0342279	0.0328225	0.0385107	0.0323649	0.0430387	0.0408387	0.0395873	0.0320052	0.0295419	0.0263194	0.0284519	0.0314485	0.0284649	0.0348519	0.0400184	0.0310308	0.0362466	0.036667	0.0443454	0.0310087	0.0357456	0.0376988
KMW0542	Decanoic acid, ethyl ester	Ester	C12H24O2	110-38-3	0.00262617	0.00196291	0.00239014	0.00194921	0.00193846	0.00183091	0.00814799	0.00946383	0.00808235	0.00862402	0.0106432	0.00597722	0.0131595	0.0109047	0.0108637	0.0101604	0.0121044	0.00979239	0.0534555	0.0500432	0.0493403	0.0492231	0.0495023	0.0534838	0.0334153	0.0368831	0.0287341
XMW0495	Dehydromevalonic lactone	Ester	C6H8O2	2381-87-5	0.010237	0.00982661	0.0566079	0.00971419	0.00985654	0.0460007	0.16705	0.188146	0.158692	0.159624	0.20219	0.13519	0.165723	0.146305	0.134595	0.141167	0.168906	0.131848	0.0622542	0.0624473	0.0650066	0.0689743	0.0539767	0.0648639	0.103788	0.113769	0.0999912
NMW0048	DextroamphetAmine	Amine	C9H13N	51-64-9	0.0282024	0.0303303	0.0313625	0.0250483	0.0292586	0.0246378	0.0861789	0.0964169	0.0866891	0.0888846	0.103295	0.0635176	0.104955	0.0962332	0.0833884	0.0863368	0.101956	0.0852946	0.00592741	0.00569286	0.00537552	0.00538403	0.0053214	0.00602102	0.0349319	0.036187	0.0338085
XMW0131*143	Di-epi-.alpha.-cedrene	Terpenoids	C15H24	50894-66-1	0.261435	0.223951	0.276429	0.228892	0.245996	0.21537	0.541905	0.622636	0.521326	0.536812	0.711984	0.483174	0.517467	0.457516	0.437395	0.42669	0.514338	0.418829	0.190388	0.171525	0.163274	0.174567	0.129793	0.203235	0.320175	0.353929	0.335269
XMW1182	Di-epi-.alpha.-cedrene-(I)	Terpenoids	C15H24	21996-77-0	0.887297	0.773246	0.894707	0.76855	0.812571	0.746865	2.52601	2.88817	2.35653	2.59729	3.25595	1.9687	4.2352	3.74057	3.58257	3.37845	4.03204	3.19873	0.727041	0.65768	0.634946	0.664813	0.667147	0.737517	1.59521	1.74721	1.54394
WMW0084	DiSulfur compounds, bis(1-methylethyl)	Sulfur compounds	C6H14S2	4253-89-8	0.00269317	0.0017966	0.00139942	0.00180561	0.00246587	0.0014868	0.00741804	0.00735153	0.00789816	0.00863016	0.00747834	0.00589912	0.00757361	0.00738854	0.00735533	0.00662463	0.00775631	0.00719494	0.00265953	0.000311551	0.00254711	0.000294649	0.00235727	0.00262595	0.00518581	0.00563802	0.00576263
WMW0086	DiSulfur compounds, ethyl 1-methylethyl	Sulfur compounds	C5H12S2	53966-36-2	6.71639	6.82587	7.43553	6.95642	7.01896	6.50417	25.8869	27.8421	24.1966	26.7311	31.8639	25.1998	29.3593	26.7449	25.4866	24.7818	28.7107	24.7503	5.09046	3.99897	4.09234	4.06736	4.2555	4.70365	12.434	14.167	13.8237
XMW0850	Dibenzofuran, 2-methoxy-	Heterocyclic compound	C13H10O2	20357-70-4	0.0424731	0.0371602	0.0390876	0.0371389	0.035933	0.0344128	0.0310411	0.0350131	0.030917	0.0322141	0.0377029	0.0297194	0.0282411	0.0250621	0.0230247	0.0228149	0.0263633	0.0225086	0.0229778	0.022479	0.0216703	0.0217523	0.0223083	0.0248654	0.0269697	0.0301267	0.0261344
XMW0007	Dibutyl phthalate	Ester	C16H22O4	84-74-2	0.038576	0.0321561	0.0990782	0.0875619	0.0385965	0.0210666	0.0254182	0.0299458	0.0228401	0.0230249	0.0295998	0.0223622	0.0161403	0.0261151	0.0247314	0.0262699	0.0322664	0.0249093	0.0228019	0.0154154	0.021866	0.028337	0.0223143	0.0298478	0.0203113	0.0271069	0.0316309
XMW0145	Dicyandiamide	Nitrogen compounds	C2H4N4	461-58-5	0.121874	0.119264	0.121017	0.124951	0.122576	0.126724	0.129143	0.12163	0.129533	0.128077	0.120685	0.128812	0.140379	0.134085	0.12747	0.1349	0.128417	0.127744	0.125276	0.129568	0.126144	0.132801	0.130403	0.127914	0.12504	0.130229	0.133025
XMW0627	Diethyl Phthalate	Ester	C12H14O4	84-66-2	0.301517	0.212567	0.227116	0.0523844	0.233873	0.226424	0.578315	0.697675	0.642623	0.574869	0.744986	0.429482	0.36765	0.329648	0.326629	0.319899	0.45461	0.318131	0.166196	0.171377	0.137664	0.142963	0.127932	0.221064	0.216272	0.236708	0.241062
WMW0085	Diethyl diSulfur compounds	Sulfur compounds	C4H10S2	110-81-6	0.272396	0.272454	0.309997	0.282141	0.286889	0.273711	0.964375	0.961255	0.905348	1.01817	1.11075	0.923576	1.22553	1.14729	1.0911	1.04571	1.176	1.06718	0.0986094	0.0882471	0.0921792	0.0933449	0.0984653	0.0911477	0.4773	0.590045	0.535083
NMW0219	Diethylpropion	Amine	C13H19NO	90-84-6	0.0367443	0.0325432	0.0339146	0.0313739	0.0333099	0.0310599	0.0240114	0.0371445	0.0230253	0.0317035	0.0308149	0.0234061	0.0288902	0.0260997	0.0234113	0.0235171	0.0234196	0.0225473	0.0448581	0.0461749	0.0390436	0.0415128	0.0394261	0.0482801	0.0250997	0.0371502	0.0361086
D78	Dihydro-3-(2H)-thiophenone	Heterocyclic compound	C4H6OS	1003-04-9	0.0577625	0.0586668	0.0628782	0.0587319	0.0579402	0.0560969	0.00670146	0.00778908	0.00660871	0.00707056	0.00926532	0.00707538	0.00846024	0.00749738	0.00733928	0.00733772	0.00881661	0.00737611	0.0402652	0.0405153	0.0416953	0.0409601	0.0436498	0.0379944	0.102301	0.119552	0.115578
XMW0620	Dimethyl phthalate	Ester	C10H10O4	131-11-3	0.0901311	0.0751858	0.089638	0.0772138	0.0793877	0.0731206	0.1333	0.109983	0.122276	0.0951264	0.173002	0.11485	0.134783	0.122611	0.116565	0.108179	0.125742	0.100256	0.0366104	0.0347592	0.0394793	0.0512968	0.0416734	0.0374861	0.0773215	0.0888875	0.0764108
KMW0141	Dimethyl sulfone	Sulfur compounds	C2H6O2S	67-71-0	3.15769	3.1497	3.56136	3.25839	3.33016	3.16189	9.83484	11.9452	9.16563	10.4986	13.7767	9.33798	12.5103	11.7452	10.9824	10.6489	11.9902	10.8595	1.16013	1.06234	0.895208	0.916139	0.967126	1.07949	6.08141	6.61448	6.77083
XMW0536	Dimethylcarbamothioic acid, O-butyl ester	Ester	C7H15NOS	19708-86-2	0.000278385	0.000372891	0.000229026	0.00040669	0.000441365	0.000193489	0.000130855	0.000254724	0.000130879	0.000259749	0.000292316	0.000315594	0.000436174	0.000359152	0.000282571	0.000255862	0.000322265	0.000300468	0.109587	0.10193	0.106915	0.104864	0.0949257	0.0952573	0.0266771	0.0250475	0.0236422
NMW0375	Dioxacarb	Heterocyclic compound	C11H13NO4	6988-21-2	0.0501022	0.0391515	0.0356723	0.0225582	0.0350587	0.0457415	0.0524222	0.115647	0.0672627	0.0667702	0.119424	0.0639169	0.0852707	0.0656828	0.0728329	0.0763879	0.0829749	0.0643515	0.0252377	0.0400592	0.0169027	0.0269773	0.0135567	0.0554562	0.0352456	0.0408618	0.0367648
KMW0545	Dodecanal	Aldehyde	C12H24O	112-54-9	0.565244	0.407139	0.354812	0.377505	0.434814	0.390813	0.550541	0.565094	0.555095	0.516737	0.549763	0.438817	0.401818	0.371318	0.363975	0.355871	0.422721	0.344398	0.0646857	0.0621261	0.0586629	0.0587558	0.0580724	0.0657073	0.339191	0.380033	0.305653
KMW0406	Dodecane	Hydrocarbons	C12H26	112-40-3	0.00319162	0.0175755	0.024335	0.0170996	0.0197139	0.0208887	0.0365966	0.0411427	0.0351738	0.038284	0.0427762	0.0318125	0.0305559	0.0436861	0.026916	0.0391301	0.0314545	0.0268612	0.0179173	0.0230179	0.0166771	0.021241	0.0168672	0.0205205	0.0267628	0.0296236	0.0237183
XMW0387	Dodecane, 1-iodo-	Halogenated hydrocarbons	C12H25I	4292-19-7	0.252167	0.203081	0.211739	0.193632	0.199689	0.180991	0.150104	0.164716	0.143371	0.142815	0.186612	0.130127	0.124491	0.105903	0.104312	0.101	0.0242713	0.0203057	0.123384	0.119131	0.108087	0.113803	0.114157	0.138617	0.122612	0.137903	0.101837
XMW1330	Dodecane, 3-methyl-	Hydrocarbons	C13H28	17312-57-1	0.0378343	0.0338322	0.0380227	0.0356944	0.0375741	0.0325524	0.0262503	0.0323024	0.0275013	0.0263031	0.0299247	0.0241294	0.0227529	0.0295045	0.0272368	0.0211192	0.0300994	0.0289003	0.0386824	0.0438812	0.0369774	0.029759	0.0293014	0.0499908	0.0247175	0.0271895	0.0299837
XMW0110	Dodecane, 4,6-dimethyl-	Hydrocarbons	C14H30	61141-72-8	0.114198	0.0973408	0.109892	0.112241	0.111695	0.104126	0.0918208	0.0990777	0.0938719	0.0995186	0.116909	0.0858257	0.092057	0.0897728	0.0835868	0.0847096	0.0981977	0.0902779	0.0946203	0.106189	0.0908825	0.0955907	0.0954702	0.119529	0.0719656	0.0868949	0.0902191
XMW0204	Dodecane, 5,8-diethyl-	Hydrocarbons	C16H34	24251-86-3	0.00927953	0.00733017	0.00741375	0.00816879	0.00802181	0.00787642	0.00100288	0.00116564	0.000988997	0.00105811	0.00138656	0.00105883	0.00126608	0.00112199	0.00109833	0.00109809	0.00131941	0.00110384	0.00567767	0.00697636	0.00519698	0.00586518	0.00502521	0.00761858	0.00682962	0.00546795	0.00631135
XMW0586	Dodecane, 5-methyl-	Hydrocarbons	C13H28	17453-93-9	0.0116038	0.0133071	0.0113595	0.0143396	0.0139897	0.01213	0.0234184	0.0294114	0.0246343	0.026206	0.0352149	0.0216924	0.0266884	0.0245785	0.0227986	0.0221325	0.0354914	0.02231	0.00732805	0.00666181	0.00638125	0.00896397	0.0105321	0.0103624	0.0160608	0.0197712	0.0180579
D265	Dodecanenitrile	Nitrogen compounds	C12H23N	2437-25-4	0.102124	0.115704	0.105061	0.116357	0.0958414	0.0905008	0.12258	0.14731	0.114801	0.13346	0.156652	0.121568	0.247314	0.218376	0.212755	0.187664	0.22988	0.195981	0.0423827	0.0378539	0.119918	0.0392556	0.124929	0.0434446	0.120593	0.11675	0.110111
KMW0599	Dodecanoic acid, methyl ester	Ester	C13H26O2	111-82-0	0.0236876	0.0171917	0.0216968	0.0153072	0.0245464	0.0225614	0.0206066	0.0260132	0.020169	0.0214418	0.0336726	0.0234766	0.0272635	0.0204353	0.0229037	0.0216914	0.0224015	0.0207842	0.00362227	0.00347894	0.00328501	0.00329021	0.00325194	0.00367948	0.0222433	0.0300842	0.0279216
WMW0059	E-2-Hexenyl benzoate	Ester	C13H16O2	76841-70-8	0.622625	0.495737	0.573034	0.480047	0.550384	0.693546	0.88419	1.24429	1.02943	0.937947	1.2121	0.973101	0.935881	0.880191	0.859271	0.776268	1.07547	0.750727	0.593902	0.579209	0.561929	0.50934	0.474456	0.713094	0.642133	0.700104	0.684373
XMW1369	E-p-Nitrophenyldiazo t-butyl sulfide	Others	C10H13N3O2S	29577-82-0	0.0195565	0.0149363	0.0137658	0.00893264	0.0128749	0.0164014	0.0204975	0.0440294	0.0257865	0.0260228	0.0454025	0.0244758	0.0388741	0.0297754	0.0326673	0.0273745	0.0385393	0.0227189	0.00925116	0.0137619	0.00750156	0.0099309	0.00594327	0.0259658	0.0123868	0.0175844	0.0133839
XMW0151	Epizonarene	Terpenoids	C15H24	41702-63-0	12.4177	8.56536	11.1251	8.3492	9.48474	11.2311	1.21408	1.41113	1.19728	1.28095	1.67857	1.28183	1.53272	1.35828	1.32964	1.32936	1.59728	1.33631	10.9054	8.5162	8.02762	6.15512	9.98034	11.4461	19.8185	28.1982	25.584
XMW1224	Ethanediamide	Amine	C2H4N2O2	471-46-5	0.00423389	0.00437041	0.00402003	0.00429557	0.00390127	0.00376545	0.000366756	0.00042628	0.000361681	0.000386957	0.000507071	0.00951181	0.000463011	0.000410316	0.00936155	0.00943713	0.000482514	0.00941288	0.00204703	0.00279421	0.0028677	0.00280266	0.00293665	0.00289787	0.00595525	0.00731416	0.00658279
NMW0779	Ethanol, 2,2'-oxybis-	Alcohol	C4H10O3	111-46-6	0.0401103	0.0417959	0.0511786	0.0419639	0.0422407	0.0376162	0.153808	0.171674	0.144052	0.161199	0.191583	0.150885	0.175887	0.160288	0.153689	0.148519	0.172147	0.149583	0.0324097	0.025978	0.0240894	0.0272857	0.0248539	0.0261681	0.0712818	0.0827679	0.079902
D299	Ethanol, 2-(3,3-dimethylcyclohexylidene)-, (Z)-	Alcohol	C10H18O	26532-23-0	0.442707	0.468889	0.524811	0.463532	0.462753	0.418991	1.01669	1.12075	0.974587	0.979009	1.20576	0.960532	1.48626	1.27838	1.26342	1.26305	1.39553	1.25414	0.167459	0.150358	0.15225	0.155196	0.172414	0.165902	0.775266	0.875187	0.837634
XMW1145	Ethanol, 2-(4-chlorophenyl)amino-	Alcohol	C8H10ClNO	2933-81-5	0.0188827	0.01597	0.0158849	0.0161245	0.0165352	0.0147485	0.0396025	0.0388238	0.037312	0.0338378	0.0413978	0.0328806	0.0335856	0.0305196	0.0295103	0.0272163	0.032337	0.0262362	0.00368215	0.00353645	0.00333931	0.0033446	0.00330569	0.0037403	0.0183894	0.0250568	0.0227385
XMW0946	Ethanol, 2-(4-ethylphenoxy)-	Alcohol	C10H14O2	54411-10-8	30.3592	28.4501	31.2603	28.3735	28.937	26.7153	63.8397	73.3039	60.3108	65.0597	84.0283	55.5452	68.8134	60.5897	58.4626	55.5848	65.7308	53.2724	6.65539	6.39203	6.03572	6.04526	5.97495	6.76049	38.1349	44.3941	39.9514
XMW0914	Ethanone, 1-(1H-pyrazol-4-yl)-	Heterocyclic compound	C5H6N2O	25016-16-4	0.645107	0.521673	0.490451	0.413581	0.484829	0.447499	2.61457	2.89724	2.6759	2.36382	2.61264	1.48355	2.55406	2.39144	1.98927	2.13203	2.69372	1.99503	0.16112	0.171475	0.127627	0.13475	0.143464	0.217553	1.02167	1.0187	0.817592
KMW0240	Ethanone, 1-(1H-pyrrol-2-yl)-	Heterocyclic compound	C6H7NO	1072-83-9	0.0930965	0.0893646	0.0901859	0.0883422	0.0896368	0.0836674	0.760833	0.714572	0.573358	0.767848	0.848287	0.60241	0.746884	0.655407	0.640293	0.636974	0.738738	0.619504	0.104526	0.10039	0.0947939	0.0949439	0.0938396	0.106177	0.463854	0.519184	0.493906
XMW0970	Ethanone, 1-(2,3,4-trihydroxyphenyl)-	Ketone	C8H8O4	528-21-2	0.00365154	0.00344572	0.0050271	0.00361229	0.00452084	0.00328907	0.0100409	0.0108824	0.00974403	0.00985085	0.0125568	0.010305	0.0115595	0.0102027	0.00998989	0.00963772	0.011985	0.00731452	0.00245467	0.00238969	0.00231712	0.00220686	0.00222407	0.00255369	0.00860196	0.00964038	0.00859583
XMW0734	Ethanone, 1-(2,4-dihydroxyphenyl)-	Ketone	C8H8O3	89-84-9	0.330214	0.293212	0.314144	0.291411	0.297993	0.279259	0.272571	0.376844	0.258943	0.32401	0.356185	0.228885	0.119967	0.100214	0.0946674	0.0947548	0.117663	0.102044	0.275756	0.257299	0.227872	0.245541	0.248409	0.285568	0.258658	0.282128	0.261876
XMW0450	Ethanone, 1-(2,4-dimethyl-1H-pyrrol-3-yl)-	Heterocyclic compound	C8H11NO	2386-25-6	0.0120778	0.00889624	0.00844656	0.00698383	0.0101883	0.00765605	0.0160599	0.0199322	0.0181105	0.0162878	0.0196271	0.00742973	0.0152806	0.0133195	0.0118199	0.0121803	0.0149468	0.0119962	0.00454337	0.00457414	0.00391872	0.00384122	0.00436163	0.00618443	0.00745905	0.00745817	0.00735548
XMW0926*080	Ethanone, 1-(2,4-dimethylphenyl)-	Ketone	C10H12O	89-74-7	0.0308848	0.0299315	0.0326558	0.0284833	0.0289722	0.0269954	0.126192	0.13992	0.119514	0.123657	0.152627	0.120895	0.192268	0.166634	0.164522	0.162899	0.181983	0.158773	0.0110819	0.0101065	0.00959327	0.00943498	0.0101693	0.0110846	0.0680123	0.0789427	0.07603
KMW0457	Ethanone, 1-(2-aminophenyl)-	Ketone	C8H9NO	551-93-9	0.338716	0.310983	0.356528	0.325145	0.325301	0.291576	1.30091	1.48418	1.26431	1.25948	1.63099	1.25667	1.53736	1.35302	1.32291	1.30584	1.5465	1.30485	0.124221	0.114476	0.0867715	0.109279	0.118219	0.125129	0.724114	0.865123	0.789398
XMW0177	Ethanone, 1-(2-methyl-1-cyclopenten-1-yl)-	Ketone	C8H12O	3168-90-9	0.0744683	0.0293705	0.0323218	0.0279792	0.0301305	0.0271657	0.214043	0.221634	0.205856	0.212075	0.246115	0.182232	0.232627	0.211037	0.198776	0.201129	0.236511	0.197002	0.016952	0.0162531	0.0156044	0.0170408	0.0174773	0.0471425	0.0777065	0.0767251	0.0833343
XMW0717	Ethanone, 1-(2-methylphenyl)-	Ketone	C9H10O	577-16-2	0.156495	0.0938253	0.0958443	0.0600596	0.107513	0.107155	0.527076	0.482601	0.505544	0.494531	0.432794	0.253106	0.357063	0.320705	0.334138	0.302194	0.372904	0.319247	0.0377152	0.0340731	0.0351325	0.0303147	0.0415983	0.0595052	0.203407	0.195633	0.180371
KMW0278	Ethanone, 1-(2-thienyl)-	Heterocyclic compound	C6H6OS	88-15-3	0.0537445	0.0501553	0.0367851	0.0473151	0.050505	0.0447071	0.0940765	0.0924975	0.0837853	0.090236	0.113481	0.0739033	0.0096433	0.00854579	0.00836559	0.00836381	0.0100495	0.00840757	0.0475805	0.0431417	0.0421223	0.043097	0.0417724	0.0478063	0.0592411	0.0649489	0.0618463
XMW0689	Ethanone, 1-(3,5-dimethylpyrazinyl)-	Heterocyclic compound	C8H10N2O	54300-08-2	0.299907	0.261674	0.269356	0.203907	0.275244	0.199109	0.0222148	1.73499	0.0219074	1.25752	1.51315	0.694934	1.46426	1.31638	1.22631	1.1802	1.84441	1.12474	0.157749	0.125891	0.112446	0.113971	0.11406	0.175739	0.495952	0.538134	0.615351
XMW0583	Ethanone, 1-(3-hydroxyphenyl)-	Ketone	C8H8O2	121-71-1	6.61114	6.03514	6.63189	5.98739	6.21842	5.68331	13.0209	6.74688	12.4067	13.3721	17.2103	11.6608	13.9574	12.4098	11.8882	11.5658	13.7892	10.9141	3.85674	3.55705	3.394	3.5068	3.591	4.05337	8.02071	9.31	8.41662
XMW0676*036	Ethanone, 1-(3-methylphenyl)-	Ketone	C9H10O	585-74-0	0.357031	0.313782	0.32318	0.285796	0.329819	0.277673	0.954594	1.09261	0.996389	0.977067	1.24359	0.616682	1.18204	1.07503	0.961167	0.966774	1.27116	0.907837	0.2072	0.196393	0.179225	0.173331	0.177115	0.217427	0.435135	0.445474	0.435361
D392	Ethanone, 1-(3-pyridinyl)-	Heterocyclic compound	C7H7NO	350-03-8	0.125979	0.115433	0.121174	0.098852	0.115697	0.0991459	0.711327	0.647905	0.728369	0.676671	0.734362	0.398799	0.793153	0.696353	0.692664	0.71526	0.881203	0.645423	0.0501453	0.0476145	0.0466904	0.0463107	0.0470117	0.0522742	0.325347	0.267164	0.272816
XMW0830	Ethanone, 1-[4-(1-piperazinyl)phenyl]-	Heterocyclic compound	C12H16N2O	51639-48-6	0.0320853	0.0281835	0.0305598	0.0291452	0.0285004	0.0256085	0.0986522	0.117178	0.0933794	0.100884	0.132194	0.0959797	0.0830519	0.0705246	0.0676535	0.0839433	0.104993	0.0856464	0.0123357	0.0123901	0.0104004	0.0107707	0.0106223	0.013274	0.0472206	0.0447005	0.0600959
XMW1204	Ethyl (methylthio)acetate	Ester	C5H10O2S	4455-13-4	0.00432764	0.00445288	0.00519816	0.00461982	0.00447431	0.00402499	0.0172927	0.0240153	0.016658	0.0182313	0.022419	0.0176888	0.0181835	0.0164897	0.020661	0.0160638	0.0187154	0.0159434	0.00296539	0.00273975	0.00298168	0.00301891	0.00311381	0.00281113	0.00980827	0.0108818	0.0105417
XMW1163	Ethyl 2-hydroxybenzyl sulfone	Phenol	C9H12O3S	53380-27-1	0.00778896	0.00747674	0.00754545	0.0073912	0.00749951	0.00700007	0.00783422	0.00910568	0.0077258	0.00826571	0.0108315	0.00827134	0.138763	0.122948	0.118902	0.115794	0.141076	0.115046	0.00874523	0.00839918	0.00793098	0.00794353	0.00785114	0.00888334	0.0354185	0.0396117	0.0418389
XMW1305	Ethyl 5-methylhexanoate	Ester	C9H18O2	10236-10-9	0.0248533	0.023857	0.0240763	0.0235841	0.0239297	0.0223361	0.255758	0.284463	0.239644	0.266085	0.319782	0.247412	0.259416	0.230163	0.221278	0.218743	0.244177	0.214147	0.0279046	0.0268004	0.0253064	0.0253465	0.0250517	0.0283453	0.110844	0.12832	0.131855
XMW0618	Ethyl 9-decenoate	Ester	C12H22O2	67233-91-4	0.119153	0.104449	0.119041	0.0980124	0.108063	0.0956286	0.539535	0.516449	0.511017	0.553699	0.692238	0.42807	0.797897	0.704598	0.674824	0.63573	0.764548	0.595832	0.397723	0.368226	0.351197	0.361959	0.36785	0.410341	0.297403	0.32933	0.29528
D361*051	Ethyl geranate	Ester	C12H20O2	32659-21-5	0.00459301	0.00456366	0.00525575	0.00480207	0.00457095	0.00377263	0.00935527	0.0157623	0.00832407	0.0111903	0.0155011	0.0121374	0.00508756	0.00451122	0.00485575	0.00407737	0.00467253	0.00409287	0.00217942	0.00240137	0.00192627	0.00175692	0.0022181	0.00277939	0.00567718	0.00671471	0.00606065
XMW1220	Ethyl hydrogen succinate	Ester	C6H10O4	1070-34-4	0.0147204	0.0141303	0.0142602	0.0139687	0.0141734	0.0132295	0.0148059	0.0172089	0.014601	0.0156214	0.0204704	0.015632	0.0186917	0.0165644	0.0162151	0.0162117	0.0194791	0.0162965	0.244559	0.246918	0.211783	0.207723	0.184094	0.273261	0.0906066	0.0921502	0.0780964
D360*051	Ethyl nerate	Ester	C12H20O2	32659-20-4	0.00459301	0.00456366	0.00525575	0.00480207	0.00457095	0.00377263	0.00935527	0.0157623	0.00832407	0.0111903	0.0155011	0.0121374	0.00508756	0.00451122	0.00485575	0.00407737	0.00467253	0.00409287	0.00217942	0.00240137	0.00192627	0.00175692	0.0022181	0.00277939	0.00567718	0.00671471	0.00606065
NMW0784	Ethyl tiglate	Ester	C7H12O2	5837-78-5	0.010011	0.00964531	0.011566	0.0104481	0.0105476	0.00819435	0.0316601	0.038442	0.0297805	0.0339857	0.0442914	0.035167	0.0403314	0.037443	0.0352319	0.0332261	0.0385536	0.0349195	0.00274395	0.00277028	0.00282102	0.00281843	0.00304544	0.00306466	0.0193277	0.0212078	0.0218055
XMW1359	Ethyl tridecanoate	Ester	C15H30O2	28267-29-0	0.00237666	0.000274833	0.000277358	0.000271688	0.00236572	0.00252965	0.00266479	0.00416168	0.00185449	0.00444423	0.00924452	0.0227182	0.017953	0.0192324	0.0190326	0.0161615	0.0265735	0.0187369	0.00234714	0.00181661	0.00145765	0.00177539	0.00170612	0.002231	0.013834	0.0211937	0.017118
KMW0218*089	Eucalyptol	Terpenoids	C10H18O	470-82-6	0.000135551	0.000130117	0.000984825	0.000765494	0.0011494	0.000885192	0.0200391	0.0212461	0.0196872	0.0195296	0.023295	0.0174284	0.0387798	0.0318959	0.0289232	0.0295974	0.0319552	0.0292941	0.000152193	0.000783197	0.000690112	0.000714295	0.000744555	0.000154596	0.00904718	0.0129396	0.0091732
XMW0054	Farnesene epoxide, E-	Terpenoids	C15H24O	83637-40-5	0.0706865	0.058305	0.0629083	0.059141	0.060361	0.0567586	0.0468337	0.0465914	0.0614053	0.0421699	0.0727907	0.0347841	0.0346355	0.0297141	0.0288549	0.0279007	0.0347536	0.0308279	0.042699	0.0415959	0.0368055	0.0385693	0.0386113	0.0495381	0.0470568	0.049336	0.0388431
WMW0216	Fenchyl acetate	Ester	C12H20O2	13851-11-1	0.0513896	0.0369739	0.0389316	0.0353725	0.0381477	0.0464988	0.0696702	0.079682	0.0669423	0.0707782	0.0865954	0.0664075	0.0685356	0.0747679	0.0688814	0.0602991	0.080706	0.0695808	0.0263867	0.0196389	0.00370884	0.0242647	0.0230869	0.0218599	0.0420776	0.0469542	0.0456397
XMW0065	Fomepizole	Heterocyclic compound	C4H6N2	7554-65-6	0.446909	0.443104	0.505713	0.459882	0.470483	0.44646	1.40919	1.70042	1.30888	1.46062	1.9575	1.57987	1.78319	1.67696	1.56652	1.52386	1.71028	1.55394	0.162421	0.149513	0.155991	0.157319	0.135738	0.150754	0.863633	0.937223	0.958097
XMW0711	Formamide, N-phenyl-	Amine	C7H7NO	103-70-8	0.0674732	0.0376549	0.0394113	0.0337177	0.0450239	0.0447445	0.0579257	0.0641675	0.0654943	0.06073	0.0683752	0.042296	0.0481766	0.0430586	0.0422521	0.0451734	0.0488157	0.0415425	0.0284424	0.0259305	0.0216478	0.022687	0.0192319	0.038361	0.0242412	0.0269732	0.0320762
XMW0607	Formic acid, 2-phenylethyl ester	Ester	C9H10O2	104-62-1	0.00807987	0.00494103	0.0050264	0.00426899	0.00576624	0.00561518	0.0278436	0.0265956	0.026494	0.031596	0.0239638	0.0140408	0.0202166	0.0181214	0.0193433	0.017207	0.0267933	0.0179731	0.00372402	0.00310607	0.00198199	0.00284195	0.00317788	0.00426347	0.00976654	0.0097537	0.00805317
D182	Fumaric Acid	Acid	C4H4O4	110-17-8	0.0181652	0.0185044	0.0200161	0.0137189	0.0196318	0.0135941	0.0330767	0.0440543	0.0344015	0.0335004	0.0539504	0.03828	0.0382505	0.0343462	0.0324546	0.0332295	0.0416515	0.0308857	0.0116327	0.00223447	0.00210991	0.0111483	0.00208867	0.00236327	0.0159281	0.0223385	0.0225005
XMW1321	Furan, 2-(1,2-diethoxyethyl)-	Heterocyclic compound	C10H16O3	14133-54-1	0.0400046	0.0530476	0.0585394	0.052435	0.0516115	0.0440194	0.0600092	0.0705919	0.0463102	0.0703829	0.0905273	0.0572534	0.072757	0.0659884	0.0575928	0.0581366	0.0760905	0.0579755	0.0313758	0.027501	0.0284893	0.0299053	0.0345955	0.0307988	0.0497395	0.0551177	0.0537033
XMW0438*013	Furan, 2-(1-pentenyl)-, (E)-	Heterocyclic compound	C9H12O	20992-69-2	0.0887332	0.0872453	0.0926622	0.0895634	0.084581	0.0816178	0.108277	0.105559	0.0986382	0.107826	0.13012	0.149207	0.168677	0.15355	0.140433	0.139422	0.14709	0.144288	0.0295937	0.0292512	0.0281551	0.0265519	0.0299951	0.0450815	0.0778309	0.0877501	0.0821271
XMW0163	Furan, 2-hexyl-	Heterocyclic compound	C10H16O	3777-70-6	0.0119225	0.0127892	0.0131708	0.0122703	0.0117454	0.0111629	0.00128649	0.00149529	0.00126869	0.00135735	0.00177868	0.00135828	0.00162413	0.00143929	0.00140894	0.00140864	0.00169254	0.00141601	0.00738358	0.00689634	0.00130238	0.00130444	0.00853468	0.00770617	0.00819436	0.00834028	0.00723036
KMW0182	Furan, 2-pentyl-	Heterocyclic compound	C9H14O	3777-69-3	0.196608	0.199799	0.221088	0.211021	0.206377	0.195144	0.868754	0.89284	0.774894	0.894957	1.02229	0.803356	0.933356	0.833914	0.791826	0.78367	0.889101	0.779187	0.155989	0.145249	0.146709	0.143573	0.152583	0.146588	0.388919	0.399473	0.421191
NMW0247	Furan, 3-(4,8-dimethyl-3,7-nonadienyl)-, (E)-	Terpenoids	C15H22O	23262-34-2	0.20783	0.176082	0.193259	0.169273	0.190095	0.164142	0.243651	0.314204	0.243766	0.25664	0.341259	0.23501	0.218945	0.201273	0.200062	0.177133	0.242182	0.180728	0.120542	0.11494	0.0955096	0.0997535	0.0969382	0.142601	0.156518	0.187403	0.183439
D448	Furfuryl heptanoate	Ester	C12H18O3	39481-28-2	0.130266	0.115303	0.11925	0.110054	0.119064	0.109041	0.0851552	0.123845	0.096648	0.102565	0.107284	0.0780347	0.0157916	0.0139943	0.0136992	0.0841844	0.0822838	0.0797866	0.128031	0.129798	0.11361	0.118512	0.115707	0.141311	0.0858377	0.105601	0.125092
D416	Furfuryl pentanoate	Ester	C10H14O3	36701-01-6	0.272398	0.25688	0.244612	0.24372	0.245092	0.227862	0.151895	0.179529	0.140524	0.147795	0.182251	0.144044	0.174892	0.147289	0.139117	0.148585	0.140186	0.137591	0.252117	0.246102	0.225201	0.238032	0.224607	0.26732	0.226634	0.253793	0.225404
NMW0210	Furo[3,4-c]pyridin-1(3H)-one, 7-hydroxy-6-methyl-	Heterocyclic compound	C8H7NO3	4753-19-9	0.238689	0.216573	0.220916	0.167065	0.220893	0.166924	0.180149	0.225381	0.174586	0.188793	0.233037	0.174929	0.222935	0.199074	0.0301736	0.181297	0.181236	0.175323	0.195455	0.204256	0.1727	0.282249	0.183504	0.21787	0.191477	0.233905	0.225731
KMW0460	Geraniol	Terpenoids	C10H18O	106-24-1	0.652401	0.817665	0.889383	0.821187	0.79317	0.69408	0.674589	0.816318	0.528472	0.791901	1.07638	0.76036	1.02496	0.913828	0.835726	0.853679	1.02833	0.86111	0.359327	0.291274	0.31504	0.320345	0.37135	0.335729	0.735934	0.819224	0.804605
KMW0638*142	Geranyl isovalerate	Ester	C15H26O2	109-20-6	0.579399	0.488942	0.593967	0.531064	0.587122	0.535728	0.497318	0.6717	0.490936	0.542413	0.706789	0.493485	0.434614	0.385427	0.397847	0.344829	0.443608	0.349533	0.330339	0.318477	0.266473	0.281978	0.283663	0.387006	0.437492	0.546932	0.429466
D181	Glycerin	Alcohol	C3H8O3	56-81-5	0.0145331	0.0141041	0.0156251	0.0145191	0.0141171	0.0133028	0.0493866	0.0565536	0.0465207	0.0526289	0.0648129	0.0495315	0.0574501	0.0522989	0.0498068	0.0492737	0.0565938	0.0497537	0.00950146	0.0101309	0.00868242	0.0102333	0.0107494	0.00858359	0.0227119	0.0273467	0.0269451
NMW0263	GrAmine	Heterocyclic compound	C11H14N2	87-52-5	0.115047	0.0915165	0.0964667	0.0882903	0.0891204	0.0813057	0.0597086	0.0841474	0.0586135	0.0733621	0.077103	0.0493949	0.0476049	0.0430953	0.039698	0.0384736	0.0473531	0.0382994	0.0616135	0.0603928	0.0542038	0.0567533	0.0566021	0.0693698	0.0770914	0.0832352	0.0611738
KMW0683	Heptadecane	Hydrocarbons	C17H36	629-78-7	0.100309	0.0852529	0.0808745	0.0869799	0.0960656	0.103788	0.0404643	0.06696	0.0449108	0.0465894	0.0529694	0.0484354	0.0437473	0.0441504	0.047896	0.0416762	0.0574569	0.0520811	0.0422803	0.0624429	0.0421397	0.0527857	0.039666	0.0619204	0.056695	0.047562	0.0485157
XMW0221	Heptadecane, 7-methyl-	Hydrocarbons	C18H38	20959-33-5	0.0358713	0.0279356	0.0284627	0.0297592	0.0367697	0.036655	0.0149838	0.0240322	0.0165931	0.0169668	0.0194685	0.0172125	0.0168127	0.0172822	0.0202985	0.01841	0.0246833	0.0200462	0.0170751	0.024421	0.0179632	0.0226749	0.016112	0.0251431	0.0204643	0.0180236	0.0188361
KMW0122	Heptanal	Aldehyde	C7H14O	111-71-7	0.0939722	0.0611155	0.0602519	0.0476534	0.0620424	0.0678671	0.131034	0.110952	0.165665	0.110352	0.0950881	0.063617	0.0748203	0.0678683	0.07787	0.0685861	0.0890826	0.0679741	0.043502	0.051049	0.0364025	0.037388	0.0321835	0.0720855	0.0545132	0.0433353	0.0472307
D84	Heptane, 1,1-dimethoxy-	Hydrocarbons	C9H20O2	10032-05-0	0.108519	0.104169	0.105127	0.102978	0.104487	0.0975283	1.15967	1.29642	1.09726	1.18355	1.42712	1.12669	1.17043	1.0365	0.999412	0.979185	1.09419	0.962276	0.121843	0.117021	0.110498	0.110673	0.109386	0.123767	0.525565	0.603854	0.57573
w06	Heptane, 2,2,4,6,6-pentamethyl-	Hydrocarbons	C12H26	13475-82-6	0.00239956	0.00230337	0.0190947	0.016759	0.00231039	0.00215652	0.0404299	0.0420273	0.0390997	0.0451671	0.0567105	0.0448646	0.0433012	0.0399873	0.0387062	0.0379033	0.0451584	0.0373773	0.0134708	0.00258755	0.0133551	0.0129711	0.0138928	0.00273671	0.0254652	0.0228227	0.0181816
XMW1046	Heptanoic acid, anhydride	Others	C14H26O3	626-27-7	0.00842021	0.00860148	0.00802255	0.00896111	0.00737802	0.00829454	0.00566224	0.00845876	0.00612175	0.00686137	0.0209421	0.0164256	0.0132877	0.0147032	0.0142618	0.0152071	0.0173761	0.016436	0.00424275	0.00510297	0.00398639	0.0043031	0.00430701	0.00613622	0.0068928	0.0155216	0.0142457
XMW0306	Heptanoic acid, methyl ester	Ester	C8H16O2	106-73-0	0.125326	0.119938	0.129418	0.110219	0.119519	0.111717	0.617694	0.631928	0.610855	0.740615	0.698036	0.529261	0.659264	0.603778	0.552257	0.555493	0.676965	0.524375	0.075207	0.0723358	0.0769709	0.0777288	0.0808143	0.0757377	0.160526	0.126207	0.156169
XMW0130	Heptanoic acid, octyl ester	Ester	C15H30O2	5132-75-2	0.142313	0.0824309	0.087399	0.0773546	0.091889	0.103124	0.18958	0.225187	0.206206	0.197438	0.258134	0.270307	0.216136	0.214265	0.205295	0.187124	0.213813	0.202431	0.0559474	0.0576629	0.0455194	0.05003	0.0485273	0.0760606	0.121768	0.155562	0.155656
NMW0221	Hexa-2,4-diyn-1-ylbenzene	Aromatics	C12H10	520-74-1	0.0483753	0.0354343	0.0362498	0.0330425	0.0364412	0.0337349	0.0344868	0.0434062	0.0327611	0.0347388	0.0434211	0.0320442	0.0245138	0.0219739	0.0189072	0.0194899	0.0205513	0.0196138	0.0416125	0.0445192	0.0378731	0.0413413	0.03972	0.0500616	0.0342946	0.039131	0.0342245
XMW0199	Hexadecane, 4-methyl-	Hydrocarbons	C17H36	25117-26-4	0.0467201	0.0394617	0.0412894	0.043019	0.0392458	0.0381122	0.0436257	0.0657663	0.0441281	0.0468467	0.0603121	0.0635937	0.0429231	0.0426688	0.0383771	0.0377509	0.047488	0.0385018	0.0268821	0.0277906	0.021787	0.0231144	0.0219019	0.0286071	0.0399642	0.0386489	0.0328528
XMW0218	Hexadecane, 7,9-dimethyl-	Hydrocarbons	C18H38	21164-95-4	0.0334215	0.0266372	0.0292086	0.0293406	0.0288181	0.0304337	0.0341268	0.0527917	0.0505458	0.0495325	0.0624181	0.0603914	0.0579594	0.0592756	0.0535333	0.0543086	0.0599792	0.0532689	0.0148905	0.0200015	0.0144114	0.0173957	0.0147376	0.0207435	0.0414063	0.0386718	0.042433
D404	Hexahydro-3-butylphthalide	Heterocyclic compound	C12H20O2	3553-34-2	0.0473025	0.0403564	0.0416239	0.0424631	0.0387261	0.0344359	0.0392549	0.0470334	0.0453093	0.0406661	0.050298	0.0371338	0.0334424	0.0385262	0.0325553	0.030194	0.0363322	0.0293378	0.034794	0.031084	0.0273569	0.0296367	0.0246714	0.035173	0.0320963	0.0328321	0.0348071
NMW0008	Hexanedioic acid, dimethyl ester	Ester	C8H14O4	627-93-0	0.0841973	0.0780279	0.0746248	0.0751677	0.0768618	0.0712454	0.0563364	0.0623007	0.0524146	0.0535448	0.0702649	0.0532302	0.0639844	0.0559527	0.0515946	0.0543907	0.0510061	0.0514542	0.0777648	0.0763626	0.0697922	0.073547	0.0702219	0.0810265	0.0637766	0.0745376	0.0648223
XMW1240	Hexanoic acid, 2-methylbutyl ester	Ester	C11H22O2	2601-13-0	0.10315	0.0977794	0.09252	0.0921163	0.0941947	0.0901214	0.0572968	0.0689402	0.0545909	0.0563923	0.0727551	0.0558411	0.0685223	0.0562107	0.0552125	0.0567282	0.0527613	0.0519781	0.095816	0.0968002	0.0899826	0.0917686	0.0834685	0.101861	0.0863063	0.0977557	0.086703
XMW1097*076	Hexanoic acid, 3-hexenyl ester	Ester	C12H22O2	84434-19-5	0.0231637	0.0196556	0.0393733	0.0191137	0.0214523	0.0181558	0.0869138	0.101024	0.0814108	0.0901017	0.114745	0.0684433	0.131714	0.117315	0.112326	0.106093	0.124054	0.0984184	0.0802788	0.0721356	0.0697302	0.0729643	0.0742513	0.0797395	0.0653214	0.0725909	0.0641782
KMW0528	Hexanoic acid, 3-hexenyl ester, (Z)-	Ester	C12H22O2	31501-11-8	0.24571	0.216805	0.232121	0.213941	0.228393	0.20789	0.687328	0.78364	0.644409	0.709912	0.891655	0.543486	1.02568	0.910734	0.872093	0.809399	0.970541	0.770168	0.165898	0.169055	0.158357	0.147487	0.149234	0.189925	0.41153	0.443091	0.401368
D222	Hexanoic acid, 3-methyl-2-butenyl ester	Ester	C11H20O2	76649-22-4	0.189224	0.181639	0.183308	0.179561	0.182192	0.170059	4.19312	4.70761	4.03841	4.17042	5.25892	3.71101	4.2876	3.78745	3.63047	3.54414	4.16372	3.36404	0.212455	0.204048	0.192674	0.192979	0.190734	0.215811	0.932984	1.17083	1.00389
D199*029	Hexanoic acid, 3-oxo-, ethyl ester	Ester	C8H14O3	3249-68-1	0.468344	0.488962	0.526718	0.399105	0.506712	0.411359	0.775688	1.15871	0.785545	0.781125	1.30403	0.929073	0.62345	0.564162	0.541106	0.545046	0.633844	0.5181	0.385435	0.297173	0.279464	0.331459	0.262604	0.386751	0.461125	0.622772	0.562193
XMW1089	Hexanoic acid, cyclopentyl ester	Ester	C11H20O2	5413-59-2	0.0113417	0.00791959	0.0118578	0.00863271	0.010946	0.00797602	0.045064	0.050802	0.0416395	0.045261	0.0579921	0.0457455	0.054744	0.0491975	0.0474465	0.0470058	0.0538993	0.0463904	0.00371351	0.00281071	0.00334658	0.00336244	0.00373134	0.00396888	0.0239999	0.0216768	0.0202401
KMW0144	Hexanoic acid, methyl ester	Ester	C7H14O2	106-70-7	0.0188783	0.0185458	0.021093	0.0196927	0.0200724	0.015475	0.0588818	0.0714188	0.0556607	0.0626614	0.0836273	0.0565607	0.0755232	0.0709234	0.0674771	0.064919	0.0718132	0.0661704	0.00733952	0.00533087	0.0052442	0.00556734	0.00619944	0.00707644	0.0371202	0.0392667	0.0407293
XMW1244	Hexanoic acid, pentyl ester	Ester	C11H22O2	540-07-8	0.630129	0.543918	0.623086	0.515842	0.580645	0.51963	0.647703	1.19818	1.05804	0.655279	0.877948	0.554318	0.935727	0.844024	0.79178	0.745841	0.836383	0.669879	0.431489	0.384991	0.362601	0.461352	0.394475	0.537788	0.662501	0.728958	0.658984
NMW0218	Hordenine	Amine	C10H15NO	539-15-1	0.0156317	0.0127223	0.0160711	0.0119994	0.0141145	0.0119407	0.0113727	0.0139426	0.0107361	0.0128884	0.013733	0.0118544	0.000913127	0.000809204	0.000792141	0.000791972	0.000951591	0.000796116	0.00414788	0.00398558	0.00366116	0.00380314	0.0038445	0.00458293	0.0132889	0.0175256	0.0165869
XMW1232	Hydrazine, 1,1-bis(2-methylpropyl)-	Nitrogen compounds	C8H20N2	16596-38-6	0.0125551	0.0122184	0.013842	0.0129124	0.0123307	0.0119915	0.0366604	0.042851	0.036274	0.0384569	0.0500146	0.0370384	0.0432395	0.0390588	0.0383778	0.0373574	0.0431329	0.037133	0.0101495	0.00926461	0.00776566	0.00802416	0.00809411	0.00822556	0.0204911	0.0215039	0.0220933
KMW0491	Hydrocinnamic Acid	Acid	C9H10O2	501-52-0	0.00943601	0.00844461	0.00979554	0.00826127	0.00930634	0.00719589	0.0172204	0.0296863	0.0155679	0.0197215	0.0255934	0.017685	0.00996579	0.0093911	0.00885799	0.00826586	0.0108454	0.00883909	0.00415428	0.00416381	0.00330772	0.00293165	0.00386807	0.00541131	0.0103924	0.0123549	0.0103065
NMW0170	Hydrocoumarin	Heterocyclic compound	C9H8O2	119-84-6	0.278071	0.243881	0.279321	0.23885	0.254761	0.232242	0.804052	0.918252	0.747494	0.826004	1.03353	0.613072	1.2	1.05657	1.02163	0.950265	1.14424	0.893606	1.48226	1.36322	1.37252	1.37449	1.40478	1.45874	0.787147	0.900093	0.786204
XMW0141	Hydroperoxide, 1,4-dioxan-2-yl	Heterocyclic compound	C4H8O4	4722-59-2	0.0882835	0.0850905	0.0942424	0.0791876	0.0854202	0.0785062	0.443259	0.445007	0.440648	0.437861	0.491405	0.258691	0.354656	0.325213	0.29177	0.297096	0.36236	0.276891	0.0549362	0.0529719	0.0561229	0.0551052	0.06143	0.0550794	0.10808	0.0943294	0.123263
D184	Hydroquinone	Phenol	C6H6O2	123-31-9	0.00362902	0.00356009	0.00419665	0.00381065	0.00391562	0.00325415	0.0129519	0.0129895	0.0125572	0.0138145	0.0148593	0.0123881	0.0166031	0.0154791	0.0144288	0.0137531	0.0160772	0.0141504	0.00153873	0.00143305	0.00132405	0.00109918	0.00132201	0.00108339	0.00660792	0.0084192	0.0090764
NMW0031	Hygrine	Heterocyclic compound	C8H15NO	496-49-1	0.00987203	0.00957384	0.0097703	0.0091466	0.00953336	0.00868371	0.0157979	0.018294	0.0146744	0.0162579	0.0204641	0.0124865	0.00145633	0.00129059	0.00126337	0.0012631	0.00151768	0.00126971	0.00904131	0.00618384	0.00616943	0.00993924	0.00839005	0.00703995	0.0133371	0.0103287	0.0121614
NMW0265	Ibuprofen	Acid	C13H18O2	15687-27-1	0.0441074	0.0335565	0.0365655	0.032787	0.0367532	0.0325179	0.113997	0.13095	0.112396	0.116011	0.147815	0.1051	0.0739177	0.0960427	0.138857	0.0611676	0.0499017	0.0605237	0.0144865	0.0137368	0.0125396	0.0131977	0.0130986	0.0177501	0.0850035	0.0943152	0.0812216
XMW0770	Indane	Aromatics	C9H10	496-11-7	6.50017	6.31804	6.31952	5.80559	6.1783	5.85489	39.4175	40.8464	39.4109	38.872	43.2694	22.2428	30.2538	27.7794	24.9526	25.3994	32.0006	23.5875	5.07667	4.88066	5.17621	5.10158	5.25072	5.10779	13.4625	12.4366	14.2968
KMW0472	Indole	Heterocyclic compound	C8H7N	120-72-9	0.0599674	0.0664042	0.0623451	0.0756336	0.0571117	0.0462481	0.103557	0.0834532	0.0708074	0.102916	0.142179	0.112006	0.112594	0.13355	0.0885077	0.087473	0.137469	0.0873395	0.0637523	0.0569235	0.0556269	0.0555109	0.0538879	0.0604103	0.0911149	0.106536	0.0948493
KMW0533	Indole, 3-methyl-	Heterocyclic compound	C9H9N	83-34-1	0.0442557	0.0384688	0.0434506	0.0377328	0.0407003	0.0363152	0.123046	0.143405	0.114013	0.126634	0.159895	0.0912489	0.182096	0.162759	0.155453	0.145208	0.175433	0.13706	0.0910463	0.0697415	0.0803635	0.0819499	0.0824711	0.07291	0.0881047	0.0977977	0.0847955
XMW0022	Iridomyrmecin	Terpenoids	C10H16O2	485-43-8	2.2742	2.03418	2.27092	2.03158	2.13472	1.92818	4.86258	5.66814	4.55196	5.02309	6.43265	4.1997	2.13687	1.86481	1.76491	4.50396	5.40028	4.30789	0.345728	1.26364	1.19145	1.23106	0.312558	0.501238	2.88006	3.1947	2.90988
XMW0803	Iso-3-thujyl acetate	Ester	C12H20O2	62181-90-2	32.5332	31.9332	33.3292	30.8629	31.514	28.3462	109.295	125.391	106.534	108.235	137.5	106.032	107.362	94.7239	91.5391	90.8363	105.613	88.7497	27.9986	26.4266	25.3788	25.5025	25.843	28.3566	56.6962	67.3167	62.5727
KMW0429	Isobornyl formate	Ester	C11H18O2	1200-67-5	2.06914	1.95442	1.86311	1.84068	1.89168	1.72565	1.38683	1.56362	1.33224	1.37858	1.78786	1.35568	1.64688	1.44179	1.34941	1.39053	1.34529	1.32279	1.91913	1.88607	1.72494	1.81432	1.71915	2.01721	1.14937	1.93776	1.71188
XMW1310*106	Isobutyl isovalerate	Ester	C9H18O2	589-59-3	0.191869	0.0996329	0.108559	0.0883694	0.104658	0.100305	0.241391	0.24189	0.227385	0.232865	0.246301	0.146807	0.186658	0.163633	0.160058	0.16282	0.203919	0.160134	0.0645606	0.0692383	0.0578795	0.059228	0.057856	0.0873803	0.0822951	0.124277	0.1196
NMW0275*103	Isoelemicin	Aromatics	C12H16O3	487-12-7	0.00832604	0.00817517	0.00893545	0.00958494	0.00801578	0.00694953	0.0218002	0.0277603	0.0222066	0.0242825	0.0314843	0.0249603	0.0290026	0.0277021	0.0255037	0.0255472	0.0294231	0.0237529	0.00826904	0.00598575	0.00642279	0.0063323	0.00612888	0.00671424	0.0149314	0.0157782	0.0146724
XMW1002	Isolongifolene, 4,5,9,10-dehydro-	Hydrocarbons	C15H20	156747-45-4	0.0606507	0.0529536	0.0608293	0.0518751	0.0555846	0.0488284	0.115054	0.130837	0.110617	0.1172	0.15438	0.0915585	0.152304	0.137042	0.131524	0.124699	0.151261	0.115998	0.0397279	0.0357224	0.033168	0.0353577	0.0336875	0.0418665	0.06988	0.074914	0.0737382
XMW1454	Isomaltol	Heterocyclic compound	C6H6O3	3420-59-5	0.0343077	0.0208456	0.0214383	0.018402	0.023593	0.0273589	0.0257814	0.026441	0.0333468	0.0266973	0.0212249	0.0122387	0.0113775	0.0100295	0.010454	0.0109126	0.0140139	0.0110795	0.0134466	0.0155881	0.00841133	0.0132234	0.0117886	0.019681	0.0108785	0.0104011	0.0110364
XMW0213	Isopentyl hexanoate	Ester	C11H22O2	2198-61-0	0.0954855	0.146828	0.159421	0.148744	0.14494	0.124426	0.0694247	0.10727	0.0446217	0.102131	0.130757	0.119782	0.106905	0.100487	0.0849903	0.0878918	0.0916299	0.0839718	0.0523676	0.0427972	0.0455757	0.0470787	0.0553733	0.0496245	0.0774193	0.100536	0.0845824
XMW0008	Isophorone	Ketone	C9H14O	78-59-1	0.0189801	0.139456	0.140216	0.126388	0.139892	0.124529	0.0190904	0.0221887	0.0188262	0.0201419	0.248872	0.184616	0.158322	0.13988	0.135101	0.138205	0.154282	0.130413	0.122994	0.117299	0.110269	0.113031	0.0956581	0.12591	0.128995	0.148019	0.132657
XMW0610*043	IsophthalAldehyde	Aldehyde	C8H6O2	626-19-7	0.192142	0.222426	0.247378	0.175123	0.163545	0.162246	0.230011	0.262862	0.22718	0.22836	0.283557	0.225407	2.07465	1.85668	1.70381	1.79638	1.98503	1.75352	0.178696	0.155219	0.163445	0.169829	0.169983	0.179624	0.466907	0.529837	0.505974
WMW0041	Isopinocarveol	Terpenoids	C10H16O	6712-79-4	0.189566	0.117416	0.122336	0.102545	0.134001	0.116021	0.608021	0.614113	0.708752	0.665786	0.588392	0.352019	0.465982	0.441938	0.433027	0.404519	0.469995	0.418436	0.0866672	0.077439	0.0558389	0.0692559	0.0651586	0.106877	0.285197	0.287029	0.246146
XMW1442	Ketone, methyl 2,2,3-trimethylcyclopentyl	Ketone	C10H18O	17983-22-1	0.00384876	0.0044659	0.00410557	0.00460076	0.00492472	0.00422107	0.0117244	0.0173027	0.0110209	0.0122785	0.0172722	0.0128884	0.000791275	0.00070122	0.000686434	0.000686288	0.0110658	0.000689879	0.0035282	0.00336092	0.00331541	0.00333816	0.00321709	0.00355357	0.00480088	0.00635194	0.00740059
XMW0972	Khusimyl methyl ether	Hydrocarbons	C16H26O	300349-20-6	0.0706842	0.0681496	0.0623563	0.0936141	0.06229	0.0655269	0.196779	0.255788	0.184574	0.225678	0.314159	0.497628	0.424907	0.451957	0.427394	0.392959	0.354409	0.427197	0.0465797	0.0388391	0.029973	0.0394369	0.0288908	0.0459946	0.229917	0.330624	0.305603
NMW0071*144	L-.alpha.-Terpineol	Terpenoids	C10H18O	10482-56-1	0.00222792	0.0172923	0.0189386	0.0169625	0.0180102	0.0164233	0.0770341	0.0781532	0.0747312	0.0772477	0.102711	0.091958	0.0734572	0.0674104	0.0674166	0.0645458	0.0665447	0.0623879	0.0152646	0.0122803	0.012252	0.0125973	0.011516	0.0127048	0.0276543	0.0455808	0.0479019
WMW0179	L-Fenchone	Terpenoids	C10H16O	7787-20-4	0.384458	0.406963	0.440188	0.333359	0.42037	0.34071	0.643818	0.950746	0.646535	0.65195	1.06603	0.764023	0.508046	0.455364	0.447188	0.45104	0.549933	0.425573	0.309739	0.267377	0.252838	0.266198	0.242168	0.308446	0.402714	0.529061	0.472934
XMW0575	L-Norleucine, methyl ester	Ester	C7H15NO2	21754-55-2	0.0786455	0.0830769	0.0901805	0.0844463	0.0865455	0.0791159	0.0103609	0.0120424	0.0102175	0.0109315	0.0143248	0.010939	0.0130801	0.0115914	0.011347	0.0113446	0.355476	0.0114039	0.060573	0.0567714	0.0549215	0.0555108	0.0561748	0.0587417	0.169993	0.198449	0.187575
D97	Lanceol, cis	Terpenoids	C15H24O	10067-28-4	0.0460479	0.0358188	0.0345591	0.0286589	0.0335129	0.0321603	0.0463872	0.0513707	0.0473567	0.0439928	0.0537139	0.0210379	0.060023	0.0514868	0.0490705	0.0481058	0.0681203	0.0479107	0.0666181	0.0620219	0.0598844	0.0610913	0.0580464	0.0648369	0.0521492	0.0476706	0.0405605
XMW1491	Lavandulyl caproate	Ester	C16H28O2	59550-36-6	0.0547697	0.0525742	0.0530574	0.0519728	0.0527344	0.0492225	0.412186	0.500582	0.413463	0.414775	0.525413	0.366898	0.375356	0.344893	0.323675	0.30844	0.401109	0.304036	0.0614939	0.0590606	0.0557684	0.0558566	0.0552069	0.0624651	0.304794	0.334098	0.290571
KMW0645*133	Levomenol	Terpenoids	C15H26O	23089-26-1	0.288343	0.246518	0.286159	0.346274	0.339725	0.315105	0.314932	0.44308	0.306553	0.3529	0.474166	0.370267	0.293096	0.270923	0.268526	0.242479	0.330552	0.245806	0.168385	0.172812	0.142683	0.15155	0.138082	0.201046	0.19069	0.24107	0.257825
KMW0360*095	Levomenthol	Terpenoids	C10H20O	2216-51-5	0.11032	0.115879	0.122538	0.106331	0.116576	0.108865	1.23247	1.41601	1.24481	1.25271	1.32891	1.13404	0.928452	1.03678	1.0154	0.84279	0.917261	0.810171	0.0606384	0.0542122	0.0572771	0.0551287	0.0547714	0.0601811	0.350467	0.409467	0.505034
XMW1136	Lilac Alcohol C	Alcohol	C10H18O2	33081-36-6	0.0983552	0.0902538	0.0964676	0.0641493	0.0965583	0.078464	0.192104	0.278963	0.197073	0.19	0.313056	0.200624	0.12792	0.115714	0.120718	0.116316	0.144877	0.109767	0.0808645	0.0728853	0.0631782	0.0671657	0.0540249	0.0854331	0.084834	0.115058	0.101133
WMW0196*086	Lilac Aldehyde C	Aldehyde	C10H16O2	53447-48-6	0.428525	0.394747	0.407644	0.380826	0.39039	0.333958	0.415816	0.67889	0.406286	0.406533	0.719518	0.533336	0.667588	0.589778	0.528341	0.560905	0.432767	0.524372	0.534617	0.348581	0.470039	0.486662	0.322612	0.564284	0.434668	0.480369	0.426
WMW0197*086	Lilac Aldehyde D	Aldehyde	C10H16O2	53447-47-5	0.428525	0.394747	0.407644	0.380826	0.39039	0.333958	0.415816	0.67889	0.406286	0.406533	0.719518	0.533336	0.667588	0.589778	0.528341	0.560905	0.432767	0.524372	0.534617	0.348581	0.470039	0.486662	0.322612	0.564284	0.434668	0.480369	0.426
KMW0324*031	Limonene oxide, cis-	Terpenoids	C10H16O	13837-75-7	0.0247457	0.0252862	0.0279773	0.0375795	0.0259401	0.02833	0.111553	0.129391	0.108967	0.109985	0.143792	0.107607	0.114404	0.102915	0.0925338	0.0953962	0.112796	0.0914783	0.0275099	0.0238302	0.0248743	0.0248073	0.0231202	0.0279658	0.0640434	0.0730521	0.0760986
KMW0453	Linalyl acetate	Terpenoids	C12H20O2	115-95-7	0.410565	0.447511	0.416956	0.400405	0.364616	0.351737	0.879937	0.962078	0.809677	0.891529	1.14387	0.8773	1.34418	1.17527	1.15064	1.14815	1.29427	1.14719	0.145164	0.151339	0.156418	0.154793	0.15184	0.166471	0.627586	0.707446	0.684363
XMW1038	Longifolenaldehyde	Terpenoids	C15H24O	19890-84-7	0.615899	0.442013	0.462936	0.401006	0.487867	0.475992	1.38473	1.78073	1.51119	1.35164	1.80781	1.05299	0.957546	0.863519	0.860914	0.844934	1.203	0.860685	0.396122	0.407475	0.318714	0.335661	0.29511	0.521647	0.455974	0.528816	0.572249
WMW0008	Longifolene	Terpenoids	C15H24	475-20-7	0.0823691	0.0756836	0.0820199	0.0820859	0.0765451	0.0729871	0.129442	0.202756	0.114784	0.199915	0.243432	0.133512	0.174161	0.15052	0.145469	0.138659	0.164771	0.146741	0.0177048	0.0170042	0.0160563	0.0160817	0.0158947	0.0179844	0.112664	0.137805	0.12524
KMW0274	Maltol	Heterocyclic compound	C6H6O3	118-71-8	0.0347276	0.0363387	0.0386942	0.0295596	0.0378584	0.0313909	0.0713265	0.0963825	0.0689736	0.0699893	0.0963708	0.0682609	0.0504406	0.0446672	0.0446627	0.0445041	0.0463831	0.041971	0.0296086	0.0258854	0.0238186	0.0248731	0.0244816	0.0297254	0.0342025	0.0482423	0.0414005
XMW1094	Megastigma-4,6(Z),8(E)-triene	Hydrocarbons	C13H20	51468-85-0	0.129631	0.111484	0.12741	0.109669	0.11816	0.106697	0.385031	0.438499	0.360219	0.395923	0.494723	0.294214	0.578964	0.50769	0.490136	0.45413	0.548908	0.42811	0.0914612	0.0826069	0.0760047	0.0852526	0.0847282	0.094199	0.232327	0.249424	0.220122
XMW0160	Megastigmatrienone	Ketone	C13H18O	38818-55-2	0.208823	0.188551	0.208778	0.195783	0.200132	0.187051	0.2455	0.371785	0.231214	0.338608	0.315431	0.214763	0.47678	0.519678	0.496325	0.386922	0.565217	0.392115	0.0805689	0.0700022	0.0685905	0.0724618	0.0717662	0.0848791	0.236254	0.232462	0.214522
NMW0333	Meperidine	Heterocyclic compound	C15H21NO2	57-42-1	0.0465133	0.0384421	0.0351905	0.0389571	0.0442255	0.047099	0.0191527	0.0324467	0.0232034	0.022905	0.0251577	0.0245644	0.0199237	0.0198847	0.0231355	0.0217776	0.0276703	0.0239331	0.017972	0.0259042	0.0178103	0.024118	0.0167194	0.0254255	0.027224	0.0217555	0.0238252
XMW0301	Mesitylene	Aromatics	C9H12	108-67-8	0.158945	0.159151	0.173013	0.139324	0.161824	0.131284	0.531596	0.586116	0.506989	0.642225	0.688334	0.534043	0.679281	0.651196	0.62727	0.517414	0.611343	0.607021	0.122543	0.0817172	0.103865	0.101864	0.107655	0.1146	0.292764	0.336191	0.334781
XMW1057	Methacrylamide	Amine	C4H7NO	79-39-0	0.0145333	0.0152897	0.0163832	0.0122688	0.0152881	0.0132266	0.0214613	0.0283443	0.0212357	0.0216812	0.0348297	0.0237863	0.0191266	0.017078	0.0170503	0.0170375	0.0205647	0.0155662	0.0151598	0.0126447	0.0116239	0.0130127	0.00230137	0.0147076	0.0101591	0.0137167	0.0139484
XMW1081	Methanesulfonylacetonitrile	Others	C3H5NO2S	2274-42-2	0.356374	0.342089	0.345233	0.338175	0.343131	0.32028	1.86887	5.62278	4.79446	1.89094	6.19703	4.91438	5.132	4.6043	4.37022	4.27931	4.94641	4.23653	0.400127	0.384294	0.362872	0.363446	0.359219	0.406446	2.31039	2.65437	2.62746
D346	Methyl 6,6-dimethylbicyclo[3.1.1]hept-2-ene-2-carboxylate	Ester	C11H16O2	30649-97-9	2.33584	2.27629	2.35861	2.21271	2.25335	2.03981	8.31866	9.51478	8.05821	8.21305	10.3509	8.03544	8.04281	7.11807	6.86519	6.83043	7.84584	6.63602	2.01082	1.89587	1.84122	1.84021	1.85292	2.0322	4.23762	4.98165	4.6379
XMW1243	Methyl 6-chloronicotinate	Ester	C7H6ClNO2	73781-91-6	0.196047	0.185073	0.177703	0.172908	0.178782	0.162871	0.131163	0.146682	0.126704	0.131257	0.169996	0.128127	0.156626	0.137317	0.127323	0.13099	0.127543	0.124455	0.184445	0.180042	0.161334	0.172661	0.162168	0.190767	0.113814	0.124151	0.16276
KMW0503	Methyl anthranilate	Ester	C8H9NO2	134-20-3	0.0283142	0.0254442	0.0269846	0.0178062	0.0267233	0.0238141	0.0911545	0.0678996	0.0845336	0.0621531	0.0790368	0.0629895	0.0556039	0.0501624	0.0616463	0.0448771	0.0530743	0.0425593	0.0153847	0.011032	0.00983113	0.0137277	0.0107447	0.0169887	0.0388459	0.0465522	0.0442252
KMW0647	Methyl jasmonate	Ester	C13H20O3	1211-29-6	0.0116856	0.00867039	0.00966156	0.0100451	0.00913667	0.0103372	0.0141482	0.0176255	0.00104173	0.0139829	0.0188106	0.0109819	0.00882737	0.00947742	0.00838112	0.00747546	0.00929802	0.00763617	0.00589596	0.0070595	0.00542399	0.00583175	0.00647862	0.00746029	0.00749231	0.00803062	0.0109636
KMW0421	Methyl salicylate	Ester	C8H8O3	119-36-8	0.0696539	0.0609048	0.0625053	0.0482504	0.0648897	0.0773046	0.328312	0.370765	0.331201	0.339731	0.439163	0.150468	0.289339	0.254392	0.246602	0.237455	0.468698	0.22595	0.0363691	0.0481358	0.0430616	0.0294946	0.044028	0.0426908	0.163045	0.162813	0.14823
KMW0544	Methyleugenol	Phenol	C11H14O2	93-15-2	0.0164602	0.0155905	0.0174576	0.01358	0.0157713	0.013166	0.0417236	0.060429	0.0557765	0.0537824	0.0667833	0.0435477	0.079671	0.066908	0.0626411	0.0675744	0.0630226	0.0525239	0.00321356	0.0030864	0.00291435	0.00291897	0.00288501	0.00326431	0.0326751	0.0313529	0.0285015
WMW0158	Methylparaben	Ester	C8H8O3	99-76-3	4.32265	4.17074	4.00645	4.06904	4.01159	3.97862	11.7514	13.2282	11.2509	11.677	15.1403	8.36844	9.76093	8.6316	8.42015	8.07267	9.7674	8.46442	2.21155	1.89698	1.80716	1.93456	1.98695	2.28237	5.50332	7.08492	6.31909
NMW0174	Mexiletine	Amine	C11H17NO	31828-71-4	0.00640036	0.00710698	0.00120262	0.00117804	0.0011953	0.0055785	0.0113468	0.0129198	0.0112586	0.0117836	0.014675	0.00904249	0.00157635	0.0144418	0.0142152	0.0131132	0.0160507	0.0129573	2.36987	2.259	2.19325	2.14579	2.46716	2.35773	0.65056	0.840587	0.684513
XMW0665	Muurola-4,10(14)-dien-1.beta.-ol	Terpenoids	C15H24O	257293-90-6	0.0158254	0.0128871	0.0157664	0.0138173	0.0144419	0.0127324	0.0261062	0.0361157	0.0260131	0.0306127	0.0368294	0.0244578	0.0145876	0.0216054	0.0126117	0.011645	0.0144229	0.0200293	0.0122143	0.00802137	0.00684849	0.00746684	0.0092081	0.0133547	0.0109631	0.010989	0.0179786
D382*124	Myristoleyl Alcohol	Alcohol	C14H28O	34010-15-6	0.0973187	0.0616871	0.0644318	0.045337	0.0700493	0.0707087	0.126279	0.152585	0.141169	0.128598	0.150191	0.08546	0.070741	0.0645519	0.0632213	0.0634013	0.0839771	0.0616676	0.0507855	0.0516568	0.037598	0.0406618	0.0381434	0.0725886	0.0558296	0.048103	0.0459071
D329*114	Myroxide	Terpenoids	C10H16O	28977-57-3	0.186059	0.188397	0.173524	0.164412	0.197589	0.1624	0.0236089	1.65589	0.0232822	1.21595	1.78429	1.13845	1.96265	1.77768	1.55587	1.62045	1.978	1.50545	0.131772	0.130787	0.141767	0.132735	0.128731	0.133989	0.822282	0.809383	0.579206
XMW1107	N,N'-Methylenebismethacrylamide	Amine	C9H14N2O2	2359-15-1	0.159114	0.135243	0.140706	0.140357	0.131151	0.126015	0.267589	0.325292	0.326748	0.269132	0.329329	0.222911	0.208611	0.189283	0.182462	0.180151	0.220042	0.18208	0.0979426	0.0912422	0.0825051	0.0871191	0.0840744	0.100469	0.152717	0.173725	0.155441
XMW0291	N-Acetylisoxazolidine	Heterocyclic compound	C5H9NO2	115615-36-6	0.117599	0.117845	0.133743	0.121605	0.124558	0.116656	0.409604	0.411206	0.382908	0.432677	0.47706	0.393514	0.519855	0.489828	0.462704	0.446685	0.500238	0.456218	0.0428735	0.0387427	0.0412766	0.041329	0.0390486	0.0396931	0.205445	0.251508	0.232221
XMW1336	N-Benzyloxy-2-carbomethoxyaziridine	Heterocyclic compound	C11H13NO3	53084-33-6	35.0485	16.5493	33.0493	27.3594	32.5397	25.149	28.4366	30.3073	32.772	26.6361	34.6979	32.3334	18.0258	12.6836	15.6893	13.0815	15.8066	12.3907	18.7534	18.8829	18.0607	16.791	16.3301	18.1282	27.7192	29.099	26.3342
XMW0550	N-Cyanomethyl-2-cyanimino-pyrrolidine	Heterocyclic compound	C7H8N4	134881-46-2	0.0626757	0.0476553	0.0502241	0.0445906	0.053264	0.0499645	0.130464	0.161938	0.141005	0.128386	0.173035	0.108127	0.0913331	0.0881903	0.0889587	0.0790685	0.118846	0.0779445	0.0408216	0.0405076	0.0332438	0.0349348	0.0312869	0.0531129	0.049413	0.0574862	0.059007
NMW0331	N-Nitrosonornicotine	Heterocyclic compound	C9H11N3O	16543-55-8	0.00832708	0.000599423	0.00693422	0.00607877	0.0066157	0.00637331	0.0105515	0.0127156	0.0114474	0.0111858	0.0132822	0.00760021	0.00971291	0.00928154	0.00651236	0.00815169	0.0116627	0.00659623	0.000701121	0.000673377	0.000635841	0.00318423	0.00317231	0.000712193	0.00552499	0.00559545	0.00580808
XMW0249*066	Naphthalene, 1,2,3,4,4a,7-hexahydro-1,6-dimethyl-4-(1-methylethyl)-	Terpenoids	C15H24	16728-99-7	39.0821	32.7287	30.7909	33.3919	41.8541	32.3854	47.6797	58.493	43.9606	51.0031	62.3424	49.6727	35.3391	31.3553	30.4296	25.6244	30.3941	24.0292	29.9238	30.4332	29.2216	26.6863	27.0357	30.7313	28.5677	38.7133	35.9373
NMW0058	Naphthalene, 1,2,3,4-tetrahydro-	Aromatics	C10H12	119-64-2	0.0354848	0.0324661	0.0329452	0.0323376	0.0329416	0.0317732	0.0179876	0.0183554	0.0168556	0.0175946	0.0186232	0.0149088	0.0211983	0.0185486	0.0122813	0.0179213	0.0114842	0.0120611	0.0334352	0.0343759	0.0311627	0.0271652	0.0350348	0.0364063	0.0192548	0.0300708	0.0287037
KMW0626	Naphthalene, 1,2,3,4-tetrahydro-1,6-dimethyl-4-(1-methylethyl)-, (1S-cis)-	Terpenoids	C15H22	483-77-2	0.0796957	0.0636886	0.0825317	0.0660828	0.0828476	0.0788767	0.0802696	0.102168	0.0754848	0.0680524	0.104877	0.0798004	0.0422846	0.0435198	0.060688	0.0487533	0.0599757	0.0268086	0.0213311	0.0183004	0.0173125	0.0188959	0.0204263	0.0222015	0.0567236	0.0667059	0.0587711
KMW0618*064	Naphthalene, 1,2,3,5,6,8a-hexahydro-4,7-dimethyl-1-(1-methylethyl)-, (1S-cis)-	Terpenoids	C15H24	483-76-1	3.87412	4.52466	4.27454	4.0767	3.80714	3.66369	3.07151	3.60618	2.90029	3.35659	4.03134	2.95707	2.17528	2.21678	2.05547	2.50681	2.83573	1.18396	1.31185	1.19245	1.17707	1.17941	1.17785	1.3011	2.59777	3.42714	3.03537
XMW0012	Naphthalene, 1,2,4a,5,6,8a-hexahydro-4,7-dimethyl-1-(1-methylethyl)-, [1S-(1.alpha.,4a.beta.,8a.alpha.)]-	Terpenoids	C15H24	24406-05-1	24.0559	11.941	22.4736	11.9651	22.456	11.7298	17.6591	22.1075	21.8977	19.408	22.8757	22.2517	13.185	11.8959	11.5146	12.7985	14.6298	11.6704	12.3982	12.5369	12.0118	11.1167	10.7749	11.9549	18.6977	14.4686	17.6209
XMW0112	Naphthalene, 1,2,4a,5,8,8a-hexahydro-4,7-dimethyl-1-(1-methylethyl)-, (1.alpha.,4a.beta.,8a.alpha.)-(.+/-.)-	Terpenoids	C15H24	5951-61-1	21.8514	19.9872	21.4144	19.7714	20.5079	18.6844	43.6735	51.0261	40.2807	45.0873	58.0723	38.8517	46.8157	41.9489	40.1274	38.035	45.4588	36.8521	13.3563	12.239	11.7637	12.1938	12.2877	13.9327	27.319	30.6552	27.511
XMW0009*064	Naphthalene, 1,2,4a,5,8,8a-hexahydro-4,7-dimethyl-1-(1-methylethyl)-, [1S-(1.alpha.,4a.beta.,8a.alpha.)]-	Terpenoids	C15H24	523-47-7	3.87412	4.52466	4.27454	4.0767	3.80714	3.66369	3.07151	3.60618	2.90029	3.35659	4.03134	2.95707	2.17528	2.21678	2.05547	2.50681	2.83573	1.18396	1.31185	1.19245	1.17707	1.17941	1.17785	1.3011	2.59777	3.42714	3.03537
NMW0198	Naphthalene, 1,2-dimethyl-	Aromatics	C12H12	573-98-8	0.0181283	0.0170044	0.0170974	0.0162543	0.01727	0.0154263	0.0129263	0.0174924	0.00917275	0.0116357	0.0159945	0.0134297	0.0150326	0.0144486	0.0128504	0.0125169	0.0162761	0.0123201	0.0121637	0.0122298	0.0108483	0.0113092	0.011995	0.0131565	0.0136692	0.0147629	0.0144243
XMW1342	Naphthalene, 1,4-dimethyl-	Aromatics	C12H12	571-58-4	0.0202425	0.0192162	0.0207925	0.0192676	0.0194592	0.0186895	0.0336184	0.0389451	0.0302094	0.0333573	0.0430388	0.0306879	0.0350978	0.0312637	0.0292578	0.0287869	0.0350387	0.0270505	0.00449528	0.0043174	0.00407673	0.00408318	0.00403569	0.00456627	0.0232254	0.0261405	0.0252649
XMW0140	Naphthalene, 1,6-dimethyl-4-(1-methylethyl)-	Terpenoids	C15H18	483-78-3	0.0855733	0.0742419	0.0753401	0.0737081	0.0726015	0.0691617	0.0586205	0.0675404	0.0592938	0.0610525	0.0757757	0.0582781	0.0552991	0.048309	0.0469623	0.044445	0.0521148	0.0433362	0.0460804	0.0454111	0.0430372	0.0429824	0.0450836	0.0488689	0.053452	0.0612779	0.0530519
w08*082	Naphthalene, 1-methyl-	Aromatics	C11H10	90-12-0	0.0238285	0.0211255	0.0236289	0.0247641	0.0219953	0.0241382	0.0464294	0.0519425	0.0447634	0.0477837	0.0590767	0.0332367	0.0498582	0.0441915	0.0424318	0.039123	0.0489334	0.0363522	0.024896	0.0232627	0.0218145	0.0227523	0.0233838	0.0256608	0.032922	0.0338307	0.0308548
NMW0261	Naphthalene, 1-nitro-	Aromatics	C10H7NO2	86-57-7	0.136617	0.108331	0.112715	0.104459	0.108185	0.0969475	0.0705194	0.100111	0.0708426	0.0758173	0.0923843	0.0607022	0.0566714	0.0518405	0.0478179	0.0461303	0.0559137	0.0446258	0.074305	0.0720358	0.0635864	0.0665688	0.0675958	0.0831766	0.0918461	0.0977021	0.073093
XMW1350	Naphthalene, 2,3,6-trimethyl-	Aromatics	C13H14	829-26-5	0.00394324	0.00378517	0.00381996	0.00374187	0.0037967	0.00354386	0.0378684	0.0439007	0.0354632	0.0378685	0.0481895	0.0359485	0.0291299	0.0255496	0.0235708	0.0227825	0.028015	0.0218272	0.00442736	0.00425217	0.00401514	0.00402149	0.00397472	0.00449728	0.0270582	0.0339516	0.035072
KMW0672	Naphthalene, 2,6-dimethyl-	Aromatics	C12H12	581-42-0	0.0971504	0.0750186	0.0815086	0.0690947	0.0744011	0.0707644	0.0786863	0.106353	0.0761677	0.0929783	0.102469	0.0595309	0.0681845	0.0542551	0.0544993	0.0485536	0.0559027	0.0445891	0.0296974	0.0280922	0.0242087	0.0251501	0.0264909	0.0340255	0.0553027	0.0801989	0.0614355
XMW0662*082	Naphthalene, 2-methyl-	Aromatics	C11H10	91-57-6	0.0238285	0.0211255	0.0236289	0.0247641	0.0219953	0.0241382	0.0464294	0.0519425	0.0447634	0.0477837	0.0590767	0.0332367	0.0498582	0.0441915	0.0424318	0.039123	0.0489334	0.0363522	0.024896	0.0232627	0.0218145	0.0227523	0.0233838	0.0256608	0.032922	0.0338307	0.0308548
NMW0272	Naphthalene, 2-nitro-	Aromatics	C10H7NO2	581-89-5	0.0623756	0.043642	0.0531634	0.0516249	0.0542408	0.0519599	0.057224	0.07276	0.0571176	0.0600821	0.0785726	0.0557487	0.0531093	0.0552079	0.0500871	0.0443013	0.0519463	0.0443102	0.0450047	0.0431682	0.0347079	0.0374261	0.0295709	0.050813	0.0454964	0.0473635	0.050303
KMW0556	Naphthalene, decahydro-4a-methyl-1-methylene-7-(1-methylethenyl)-, [4aR-(4a.alpha.,7.alpha.,8a.beta.)]-	Terpenoids	C15H24	17066-67-0	0.972337	0.849408	0.923952	0.474857	0.511078	0.465347	1.02906	1.25042	0.997612	1.08325	1.34024	0.885984	1.642	1.43865	1.37402	1.33422	1.60732	1.32443	0.56056	0.541671	0.478458	0.505348	0.50508	0.587831	0.912371	1.0015	0.912594
XMW0869	Neoisolongifolene, 8,9-dehydro-	Terpenoids	C15H22	67517-14-0	0.0152134	0.0100892	0.00986896	0.00890129	0.0107499	0.0110479	0.0173424	0.00125894	0.0176443	0.0011428	0.00149754	0.0134567	0.00136741	0.00121179	0.00118624	0.0123237	0.00142501	0.0147679	0.00714385	0.00697809	0.00548262	0.00598498	0.00108548	0.00871349	0.0101108	0.0109291	0.00997506
NMW0144	Neric Acid	Terpenoids	C10H16O2	4613-38-1	0.246916	0.218242	0.24714	0.21255	0.236675	0.191203	0.41224	0.797453	0.388122	0.463635	0.586438	0.386408	0.301439	0.268882	0.253013	0.244611	0.313353	0.265734	0.117751	0.11343	0.0827984	0.0727648	0.103194	0.1578	0.241986	0.302101	0.250218
NMW0187	Nicotine, 1'-demethyl-, (.+/-.)-	Heterocyclic compound	C9H12N2	5746-86-1	0.236465	0.205783	0.232954	0.210244	0.218161	0.199515	0.329479	0.347124	0.315682	0.32221	0.424723	0.365897	0.389973	0.340295	0.335628	0.314265	0.383141	0.24279	0.105341	0.0940861	0.0889244	0.0948831	0.0975903	0.112581	0.227452	0.255594	0.226916
XMW0520	Nitroguanidine	Nitrogen compounds	CH4N4O2	556-88-7	0.00506596	0.00425529	0.00527144	0.00394632	0.00474788	0.00419453	0.014898	0.0218268	0.0143694	0.0123805	0.0158975	0.0116106	0.029361	0.0251753	0.0228748	0.0182309	0.0266147	0.0139213	0.538875	0.515703	0.497258	0.55061	0.556197	0.535344	0.156036	0.198209	0.163111
KMW0137	Nonane	Hydrocarbons	C9H20	111-84-2	0.00332003	0.0033937	0.00406105	0.00359525	0.00383884	0.0037672	0.00872923	0.00838652	0.00879805	0.00996826	0.00975495	0.00801526	0.00839626	0.00782974	0.00770409	0.00724995	0.00746457	0.00710635	0.00317156	0.00288664	0.00305088	0.00243443	0.00333535	0.00303356	0.00629676	0.00637467	0.00589512
WMW0120	Nonane, 1-iodo-	Halogenated hydrocarbons	C9H19I	4282-42-2	0.103084	0.0887283	0.101948	0.0872091	0.0983219	0.0787565	0.190412	0.286765	0.181609	0.217976	0.274724	0.13928	0.108287	0.0970721	0.0916736	0.0887556	0.113644	0.0962322	0.0526854	0.0588192	0.0448369	0.0459691	0.0502134	0.0563046	0.0781266	0.117786	0.0837732
XMW0649	Nonane, 2,6-dimethyl-	Hydrocarbons	C11H24	17302-28-2	0.0380341	0.0369981	0.0349574	0.0299623	0.0361234	0.0299915	0.117017	0.178419	0.119021	0.114953	0.199707	0.0805316	0.0817831	0.0757779	0.0669222	0.0678867	0.113786	0.062882	0.0273255	0.0355223	0.025744	0.0261345	0.0252914	0.0283237	0.0343913	0.0493062	0.0458901
XMW0597	Nonane, 2-methyl-	Hydrocarbons	C10H22	871-83-0	0.0088726	0.00392031	0.00984904	0.0092918	0.0107322	0.00339396	0.00613941	0.0083431	0.00587942	0.00623466	0.00617255	0.00720423	0.00707711	0.00433364	0.000831982	0.00559134	0.000999452	0.000836157	0.00922013	0.00441598	0.00858609	0.00878943	0.0082069	0.00999658	0.00905971	0.0099227	0.0080707
XMW0591*037	Nonane, 2-methyl-5-propyl-	Hydrocarbons	C13H28	31081-17-1	0.0631043	0.151107	0.174013	0.149226	0.0675294	0.149931	0.189628	0.20895	0.180458	0.198797	0.278812	0.232508	0.356433	0.332395	0.302987	0.299345	0.351206	0.291657	0.151865	0.160718	0.145438	0.150541	0.15067	0.0679869	0.167481	0.212233	0.186387
XMW0577	Nonane, 5-(2-methylpropyl)-	Hydrocarbons	C13H28	62185-53-9	0.254614	0.240757	0.233532	0.227495	0.240291	0.212616	0.204958	0.237981	0.195596	0.201952	0.256107	0.192318	0.185488	0.160016	0.143826	0.155404	0.152369	0.145891	0.244018	0.2367	0.219456	0.223262	0.218616	0.253765	0.216945	0.173117	0.230046
XMW0371	Nonane, 5-methyl-5-propyl-	Hydrocarbons	C13H28	17312-75-3	0.0587256	0.0509982	0.0528718	0.053616	0.0549105	0.0486418	0.0553824	0.0688178	0.0543889	0.0555383	0.067044	0.0512227	0.0572323	0.0541931	0.0477284	0.0509718	0.0566001	0.0519674	0.0473117	0.0510876	0.043045	0.0501378	0.0479093	0.0595706	0.0465547	0.0492421	0.0585314
KMW0461	Nonanoic Acid	Acid	C9H18O2	112-05-0	0.00788117	0.00780763	0.00848297	0.00739087	0.00746359	0.00726548	0.0168943	0.019352	0.0162449	0.0163847	0.0198882	0.0158275	0.0258889	0.0211473	0.0210706	0.0213966	0.023161	0.0208499	0.00355119	0.00281239	0.00219286	0.00245969	0.00220486	0.00678786	0.0119775	0.0136316	0.0129482
XMW0229	Nonanoic acid, 9-oxo-, methyl ester	Ester	C10H18O3	1931-63-1	0.0239924	0.0216363	0.0234063	0.0172961	0.0224117	0.0154018	0.0388463	0.0438895	0.0356685	0.0408102	0.0528487	0.0384775	0.0422882	0.0367025	0.0369445	0.036561	0.0441791	0.0359067	0.00384831	0.00369603	0.00349	0.00349552	0.00345487	0.00390909	0.0300272	0.0335321	0.0300654
XMW0614	Nonanoic acid, ethyl ester	Ester	C11H22O2	123-29-5	0.00683152	0.00672059	0.007088	0.00655989	0.00651949	0.00626356	0.00106275	0.00123522	0.00104804	0.00112128	0.00146933	0.00112204	0.020297	0.0187002	0.0174934	0.0173642	0.0208651	0.0175034	0.00610214	0.00582035	0.00537936	0.0054598	0.00548223	0.00614931	0.0111464	0.0136357	0.0132007
NMW0413	Noruron	Terpenoids	C13H22N2O	18530-56-8	0.0328062	0.0422348	0.0492422	0.0397541	0.0392296	0.0426813	0.0213838	0.0472785	0.0294322	0.0204537	0.0283663	0.0277002	0.0341502	0.0429675	0.0438262	0.0351367	0.046194	0.0311173	0.0218154	0.0455466	0.0283285	0.0566418	0.0230219	0.0446931	0.030724	0.0330871	0.0412354
KMW0186	Octanal	Aldehyde	C8H16O	124-13-0	0.0765399	0.0588494	0.0593492	0.0513162	0.0602019	0.0744896	0.0851935	0.0874846	0.100243	0.08203	0.0856336	0.0444312	0.0607967	0.052372	0.0516164	0.0533834	0.0718946	0.0539225	0.0403024	0.0508817	0.0440059	0.0367699	0.0348739	0.0528126	0.0434113	0.0351646	0.035763
D76	Octanal dimethyl acetal	Ether	C10H22O2	10022-28-3	0.0591029	0.0544931	0.0541918	0.0525905	0.0540876	0.0467934	0.039523	0.0463164	0.0361501	0.0383254	0.0518742	0.0399448	0.0480743	0.0425317	0.0343258	0.0397133	0.0400401	0.0390018	0.050926	0.0503366	0.0459174	0.0459662	0.0470036	0.0528415	0.049879	0.0567987	0.0525789
w14	Octane, 1,1'-oxybis-	Hydrocarbons	C16H34O	629-82-3	0.011054	0.00930566	0.0110059	0.0103652	0.0100783	0.00936913	0.0120721	0.0146621	0.0110938	0.0119716	0.0140877	0.0104943	0.011699	0.01138	0.0108606	0.0082868	0.0102107	0.00778268	0.00504702	0.00380933	0.00362448	0.00307807	0.002801	0.00495988	0.00684036	0.00936757	0.00927182
XMW0604	Octane, 2,3,3-trimethyl-	Hydrocarbons	C11H24	62016-30-2	0.00550884	0.00513865	0.00554542	0.00412381	0.00524803	0.00375372	0.0112885	0.0118288	0.00982135	0.0109689	0.0125333	0.0106066	0.0106052	0.0101678	0.00968228	0.0106884	0.0118531	0.00880837	0.00454599	0.00467538	0.00400483	0.00455368	0.00403176	0.00472233	0.00622587	0.00691514	0.00675599
XMW1065	Octane, 2,6,6-trimethyl-	Hydrocarbons	C11H24	54166-32-4	0.0186786	0.0132943	0.0156563	0.0166447	0.0145579	0.01334	0.0481435	0.0543016	0.0456418	0.0499644	0.0620915	0.0461817	0.0569331	0.0526225	0.0500292	0.0477162	0.0569655	0.0479539	0.0150051	0.0135333	0.0116691	0.0112174	0.0145384	0.0118146	0.0215788	0.0260109	0.0257468
NMW0196	Octanedioic acid, dimethyl ester	Ester	C10H18O4	1732-09-8	0.010552	0.00925277	0.118536	0.00915823	0.010227	0.00964343	0.00119955	0.00139423	0.00118295	0.00126562	0.00165848	0.00126648	0.00151437	0.00134202	0.00131372	0.00131344	0.00157816	0.00132031	0.00799297	0.00643029	0.00706398	0.00788869	0.00765891	0.00837648	0.0134053	0.0159364	0.0151614
KMW0464	Octanoic Acid	Acid	C8H16O2	124-07-2	0.329849	0.302346	0.306361	0.295609	0.297967	0.267728	0.214802	0.254767	0.203854	0.212766	0.379294	0.296649	0.272648	0.234841	0.185115	0.222595	0.216992	0.187408	0.29119	0.289399	0.262989	0.26759	0.27267	0.307921	0.274426	0.310557	0.293077
D446	Octanoic acid, 2-furanylmethyl ester	Ester	C13H20O3	39252-03-4	0.00512873	0.00393681	0.00378014	0.0124831	0.0138987	0.00421747	0.0400439	0.0470697	0.0431343	0.0379256	0.0512306	0.0298585	0.0300477	0.0252933	0.025035	0.025119	0.0349951	0.0255201	0.0134408	0.0136982	0.0113115	0.0121487	0.0104996	0.0175944	0.0169289	0.0153806	0.0194596
XMW1417	Octanoic acid, 3-hexenyl ester, (Z)-	Ester	C14H26O2	61444-41-5	0.279111	0.199712	0.208805	0.182202	0.217702	0.214043	0.609442	0.730946	0.658368	0.594543	0.785901	0.468696	0.43153	0.390716	0.383698	0.381244	0.534846	0.355599	0.173981	0.178412	0.140843	0.146646	0.13014	0.225047	0.209434	0.2401	0.253106
XMW1345	Octanoic acid, 3-methylbutyl ester	Ester	C13H26O2	2035-99-6	0.552874	0.461721	0.474604	0.464491	0.498555	0.44843	1.08551	1.1816	1.02289	1.04176	1.43124	0.721839	1.75869	1.57181	1.53654	1.40686	1.68092	1.36072	0.381171	0.350519	0.333163	0.342473	0.354814	0.394436	0.68546	0.830399	0.769378
KMW0625	Octanoic acid, hexyl ester	Ester	C14H28O2	1117-55-1	0.231811	0.183582	0.220724	0.167371	0.176516	0.162515	0.539652	0.595927	0.559909	0.526745	0.650408	0.411604	0.373999	0.329604	0.321586	0.314713	0.401258	0.307737	0.212774	0.210433	0.196928	0.19764	0.185971	0.235049	0.204004	0.192615	0.285243
KMW0232	Octanoic acid, methyl ester	Ester	C9H18O2	111-11-5	0.00208107	0.00178265	0.00924421	0.00796583	0.00886283	0.00758335	0.0443715	0.0345541	0.0446715	0.0429224	0.0447034	0.022697	0.0452071	0.0407815	0.0354076	0.0374582	0.0456191	0.0334879	0.00216932	0.00212715	0.00187812	0.00201524	0.00198183	0.00215113	0.0120791	0.010456	0.0108531
XMW0587	Octanoic acid-tert butyl ester	Ester	C12H24O2	5457-66-9	0.0151893	0.016509	0.0161489	0.00288272	0.015163	0.0138579	0.0351344	0.0388986	0.0472531	0.0494875	0.0492995	0.0365741	0.0410177	0.0442734	0.0338611	0.0408296	0.0385457	0.0332065	0.00341082	0.00327585	0.00309324	0.00309814	0.0030621	0.00346468	0.021916	0.0257611	0.0274012
NMW0410	Orphenadrine	Amine	C18H23NO	83-98-7	0.00844571	0.0106705	0.0123259	0.0100822	0.00982042	0.0107101	0.00677306	0.0119659	0.00772043	0.0053195	0.00710659	0.00716073	0.00854486	0.011313	0.011282	0.0089945	0.0156221	0.00781547	0.00565099	0.0120255	0.00680489	0.0140659	0.00605506	0.0158169	0.00810277	0.00821456	0.0105283
NMW0063	Oxazolidin-2-one	Heterocyclic compound	C3H5NO2	497-25-6	0.990787	0.907818	0.919385	0.89278	0.903409	0.802264	0.864255	0.989874	0.83872	0.85261	1.17742	0.91611	1.05239	0.930288	0.893968	0.865489	0.873197	0.893215	0.880914	0.872313	0.797697	0.802913	0.824311	0.920552	0.841614	0.952579	0.889433
XMW0246	OxiranecarboxAldehyde, 3-methyl-3-(4-methyl-3-pentenyl)-	Aldehyde	C10H16O2	16996-12-6	0.709299	0.665631	0.541091	0.535319	0.648118	0.502036	0.436016	0.500895	0.418359	0.428661	0.56417	0.438554	0.432029	0.377833	0.354391	0.360974	0.518814	0.345701	0.566563	0.553	0.503753	0.530205	0.506059	0.592273	0.435873	0.5061	0.564244
WMW0203	Palmitoleic Acid	Acid	C16H30O2	373-49-9	0.000556995	0.000534667	0.0112553	0.000528551	0.000536296	0.000500581	0.00534264	0.00468205	0.0055672	0.00552837	0.00677336	0.00691466	0.00353631	0.00429396	0.00441323	0.00418363	0.00628415	0.00419746	0.00639146	0.00733687	0.00542716	0.00714747	0.00405387	0.00810809	0.00690074	0.00645517	0.0067186
XMW0640	Panaxene	Terpenoids	C15H24	871660-95-6	0.422543	0.407982	0.452728	0.393108	0.409566	0.357837	1.63045	1.88605	1.58721	1.59866	2.04004	1.56833	1.91013	1.67904	1.63581	1.62565	1.90847	1.62297	0.146115	0.134189	0.129896	0.126672	0.13942	0.144572	0.888561	1.06716	0.981865
XMW0025	Paroxypropione	Ketone	C9H10O2	70-70-2	64.1902	52.7122	62.023	52.4399	56.8229	51.4939	93.8323	88.148	82.3523	78.0175	96.8003	80.8743	67.2832	61.3533	58.3558	55.1452	63.3169	65.6158	57.1645	57.6653	55.1199	51.2987	49.7479	55.2491	57.5598	62.3644	58.4288
XMW2429*059	Patchoulene	Terpenoids	C15H24	1405-16-9	1.2722	1.22488	3.36954	2.9451	3.08529	1.14707	3.68465	4.01576	7.39208	3.49968	10.494	4.02575	9.08528	8.12691	7.80556	7.23031	8.65567	6.8795	1.84874	1.68732	1.60256	1.66806	1.72298	1.91821	4.54169	5.01238	4.47171
NMW0234	Patulin	Heterocyclic compound	C7H6O4	149-29-1	0.0820022	0.0697872	0.0761551	0.0701336	0.0719087	0.0669537	0.0028174	0.00327465	0.00277841	0.00297257	0.00389529	0.0029746	0.00355682	0.00315202	0.00308555	0.00308489	0.00370664	0.00310103	0.056829	0.0524042	0.014261	0.0499238	0.0510803	0.0576841	0.0483759	0.0585048	0.0443331
KMW0602	Pentadecane	Hydrocarbons	C15H32	629-62-9	0.581801	0.518937	0.516597	0.420484	0.555085	0.521602	0.692776	0.788425	0.651266	0.654527	0.911021	0.647292	0.65554	0.56548	0.54785	0.573271	0.709685	0.632582	0.457222	0.511091	0.435496	0.447333	0.44393	0.537331	0.519562	0.621959	0.58918
XMW0230	Pentadecane, 2,6,10,14-tetramethyl-	Hydrocarbons	C19H40	1921-70-6	0.0449792	0.0402508	0.0332084	0.039094	0.0416544	0.0405994	0.0151497	0.0226258	0.0159006	0.0181387	0.0209609	0.0176799	0.0180832	0.0217256	0.0242803	0.0157904	0.0216416	0.0195393	0.0176077	0.0219795	0.0211044	0.0214496	0.0174993	0.0214558	0.0191932	0.0262913	0.0234303
XMW0158	Pentadecane, 2,6,10-trimethyl-	Hydrocarbons	C18H38	3892-00-0	0.0421255	0.0319469	0.0347031	0.0369804	0.0385955	0.0404744	0.0264224	0.03805	0.0265019	0.0299404	0.0331582	0.026274	0.0227394	0.0230243	0.0226031	0.0214868	0.0280881	0.0242852	0.0201395	0.0275373	0.0197123	0.0220528	0.0215041	0.0294753	0.0239469	0.0229886	0.0255375
XMW0813	Pentanal O-benzyloxime	Nitrogen compounds	C12H17NO	72399-21-4	1.03764	0.801075	0.900505	0.747788	0.890153	0.807751	1.50214	1.88725	1.57697	1.49342	2.07699	1.27378	1.21468	1.12332	1.10535	1.02778	1.44733	0.999067	0.713303	0.696667	0.571577	0.606588	0.561405	0.866725	0.75634	0.840148	0.873337
WMW0183	Pentanedioic acid, dibutyl ester	Ester	C13H24O4	6624-57-3	0.0558636	0.0467444	0.0492696	0.0433124	0.0470513	0.0427275	0.0405542	0.0535694	0.0383007	0.0425839	0.0564353	0.0365738	0.0356928	0.0317327	0.0321755	0.041412	0.0492582	0.0433744	0.0337625	0.0320639	0.0289318	0.0285193	0.028333	0.0364951	0.0299966	0.0349656	0.0435139
KMW0605	Pentanoic acid, 1-ethenyl-1,5-dimethyl-4-hexenyl ester	Ester	C15H26O2	10471-96-2	1.94755	2.00187	1.73096	2.04995	1.88763	1.80227	9.91477	11.5183	9.45975	10.2438	13.0272	8.7509	11.103	9.98722	9.57883	8.89604	10.6733	8.63353	2.31105	1.92262	1.81719	1.72146	2.09466	2.39353	4.67778	5.66779	5.31653
XMW1303	Pentanoic acid, 2-hydroxy-4-methyl-, ethyl ester	Ester	C8H16O3	10348-47-7	0.553071	0.5309	0.53578	0.524827	0.532517	0.497054	5.72047	6.15491	5.24636	5.84421	6.99684	5.32425	5.64402	4.98103	4.83374	4.76539	5.4351	4.67	0.620973	0.5964	0.563155	0.564046	0.557485	0.630779	2.71696	3.04636	2.93422
D455	Pentanoic acid, 2-hydroxy-4-methyl-, methyl ester	Ester	C7H14O3	40348-72-9	0.00397073	0.00392719	0.00431924	0.00383107	0.00394135	0.00397035	0.0172048	0.0179712	0.0154973	0.0177926	0.0160191	0.0128736	0.0192991	0.0169562	0.0165892	0.0163384	0.0186515	0.0161962	0.0024241	0.00189074	0.00206588	0.00212892	0.00222617	0.00222223	0.00654982	0.00825696	0.00834495
D447	Pentanoic acid, 2-methyl-, ethyl ester	Ester	C8H16O2	39255-32-8	0.039331	0.0388666	0.044914	0.0407467	0.041968	0.032924	0.133605	0.132156	0.124805	0.140245	0.154244	0.12786	0.16907	0.157319	0.150004	0.145399	0.163029	0.148139	0.0165646	0.0113917	0.0120272	0.0121731	0.0128108	0.0157303	0.0771179	0.084936	0.0869501
KMW0653	Pentanoic acid, 3,7-dimethyl-2,6-octadienyl ester, (E)-	Ester	C15H26O2	10402-47-8	0.0565926	0.0392708	0.0397048	0.035483	0.0402401	0.0409067	0.0722322	0.0873662	0.116089	0.0732322	0.123607	0.0722836	0.0621792	0.0551379	0.0551076	0.0538578	0.0718441	0.051666	0.0324247	0.02639	0.0195243	0.021862	0.0208917	0.0348245	0.0379837	0.039326	0.0384321
KMW0164	Pentanoic acid, 4-methyl-, ethyl ester	Ester	C8H16O2	25415-67-2	0.00710151	0.00811474	0.00871016	0.00794907	0.00846124	0.00760321	0.0260254	0.0280702	0.0237626	0.0267035	0.0311157	0.0268265	0.0313875	0.0276253	0.0271151	0.0262998	0.0310422	0.0252657	0.0061581	0.00497011	0.00484672	0.00478787	0.00559856	0.00526206	0.0133028	0.0137358	0.0147944
XMW0463*110	Pentanoic acid, phenylmethyl ester	Ester	C12H16O2	10361-39-4	0.995136	0.864738	0.989994	0.854816	0.908976	0.826795	2.84232	3.28082	2.67885	2.8777	3.73096	2.23165	4.32265	3.831	3.65834	3.42601	4.09951	3.16455	14.8131	12.5917	13.7351	13.6839	14.1883	13.0449	4.65805	5.72235	4.91644
D204	Pentyl octanoate	Ester	C13H26O2	638-25-5	0.961832	0.818651	0.846053	0.60554	0.797826	0.577366	0.0791301	0.0919726	0.078035	0.0834884	0.109404	0.0835453	0.0998976	0.0885283	0.0866615	0.0866431	0.104106	0.0870964	0.441659	0.538344	0.503902	0.41208	0.534558	0.465819	0.683871	0.669304	0.514594
NMW0241	Pentylenetetrazol	Heterocyclic compound	C6H10N4	54-95-5	0.622962	0.59799	0.603486	0.591149	0.599812	0.559867	7.52257	9.15802	7.24224	8.02512	9.71164	7.03174	5.26806	5.8716	6.03359	5.04699	5.88974	3.44831	0.699445	0.671768	0.634321	0.635324	0.627935	0.710491	3.37639	4.67078	4.31394
NMW0311	Phenacetin	Amine	C10H13NO2	62-44-2	0.00134805	0.00129401	0.0013059	0.00127921	0.00129795	0.00121151	0.0426959	0.0559444	0.0414785	0.0453681	0.0573011	0.0468064	0.207461	0.187075	0.179234	0.176549	0.231098	0.175348	0.00917827	0.0080527	0.0070053	0.00771585	0.00679405	0.00896966	0.0513922	0.0585203	0.0606034
KMW0364	Phenethyl mercaptan	Sulfur compounds	C8H10S	4410-99-5	0.0270255	0.0171689	0.0112524	0.0090388	0.0194413	0.0140779	0.0923984	0.0883386	0.104184	0.102655	0.0538264	0.0323461	0.0696773	0.062196	0.0655	0.0584994	0.0715628	0.0614857	0.0120663	0.00679194	0.00650844	0.00624632	0.00752777	0.00957942	0.0349577	0.0385749	0.0319623
NMW0201	Phenmetrazine	Heterocyclic compound	C11H15NO	134-49-6	0.527178	0.465173	0.524327	0.469617	0.486005	0.444284	0.798304	0.978381	0.75049	0.853374	1.06322	0.644518	1.09924	0.988193	0.798488	0.88078	1.04009	0.841071	0.35869	0.367272	0.328965	0.347661	0.352653	0.406678	0.554373	0.603334	0.567717
KMW0175	Phenol	Phenol	C6H6O	108-95-2	0.491284	0.492593	0.531104	0.492421	0.500264	0.45711	1.71192	1.87412	1.61472	1.78987	2.15231	1.68264	1.96983	1.80511	1.71797	1.6703	1.94124	1.6696	0.328606	0.298123	0.297348	0.315447	0.303502	0.298651	0.816408	0.95494	0.932812
D259	Phenol, 2,3,6-trimethyl-	Phenol	C9H12O	2416-94-6	0.0350151	0.032373	0.0302365	0.0304349	0.0307689	0.0291891	0.0291654	0.0336605	0.0362192	0.0373809	0.0444962	0.0365246	0.0434694	0.0393702	0.037507	0.039098	0.0384751	0.0347654	0.0306281	0.0319739	0.0294716	0.0517662	0.0274156	0.0333137	0.0318049	0.0366606	0.0319443
KMW0732	Phenol, 2,6-dimethoxy-4-(2-propenyl)-	Phenol	C11H14O3	6627-88-9	0.00114814	0.00187194	0.00195114	0.00204278	0.00188921	0.00160399	0.0195643	0.0232313	0.018588	0.0214344	0.0275867	0.0350989	0.0344793	0.0308947	0.0298649	0.0292549	0.0263609	0.0290466	0.00053429	0.000430937	0.00041181	0.000557922	0.000507566	0.000501391	0.0166407	0.0207589	0.019373
D330	Phenol, 2-(phenylmethyl)-	Phenol	C13H12O	28994-41-4	0.00120602	0.00115768	0.00116832	0.00114443	0.00116121	0.00108387	0.00121303	0.0014099	0.00119624	0.00127984	0.00167712	0.00872521	0.00823355	0.00745754	0.00739252	0.00693506	0.00820439	0.00667575	0.00135409	0.00130051	0.00122801	0.00122996	0.00121565	0.00137547	0.00813417	0.0090171	0.00799932
NMW0047	Phenol, 2-ethyl-	Phenol	C8H10O	90-00-6	0.0317672	0.0329938	0.0352177	0.0269059	0.034178	0.0287965	0.053993	0.070839	0.0547083	0.0532889	0.0985331	0.0703383	0.0522268	0.0455254	0.0459755	0.0456933	0.0386499	0.0430928	0.0306393	0.0260596	0.0255001	0.0258428	0.0225691	0.0295257	0.0360138	0.0407341	0.0350607
KMW0710	Phenol, 2-methoxy-4-(1-propenyl)-	Phenol	C10H12O2	97-54-1	0.00479823	0.00567748	0.00480958	0.00577022	0.00463328	0.00440831	0.00791343	0.000644157	0.00745944	0.000584735	0.0103557	0.00791709	0.00802098	0.00749924	0.00707131	0.00650656	0.00773193	0.00617701	0.00322848	0.00302089	0.00280528	0.00310785	0.0031035	0.00317495	0.00599846	0.00943067	0.00812651
KMW0696	Phenol, 2-methoxy-4-propyl-	Aromatics	C10H14O2	2785-87-7	0.000857715	0.000542034	0.000765965	0.000554399	0.000572492	0.000101495	0.00187493	0.00145486	0.00173875	0.00194489	0.00196888	0.00134567	0.00199082	0.00208612	0.00181738	0.00163288	0.00182017	0.00166549	0.445369	0.4098	0.415499	0.414771	0.421117	0.431542	0.0819313	0.103685	0.0922311
KMW0382	Phenol, 2-methyl-	Phenol	C7H8O	95-48-7	0.722482	0.693521	0.699894	0.685587	0.695633	0.649307	7.46734	7.9908	6.8377	7.56334	9.09433	6.92162	7.33259	6.4748	6.27172	6.18508	7.1394	6.06601	0.811183	0.779084	0.735655	0.736819	0.728249	0.823993	3.52243	3.95492	3.833
NMW0121*045	Phenol, 2-methyl-5-(1-methylethyl)-	Terpenoids	C10H14O	499-75-2	0.535613	0.536644	0.557396	0.526629	0.517008	0.466771	0.6571	0.700098	0.584437	0.673927	0.860944	0.730305	0.907012	0.820174	0.711778	0.710685	1.04614	0.70444	0.614711	0.574767	0.567663	0.571366	0.548693	0.603863	0.570882	0.710369	0.782122
NMW0226	Phenol, 3-nitro-	Phenol	C6H5NO3	554-84-7	0.142944	0.118403	0.142754	0.117798	0.127975	0.116659	0.319643	0.362923	0.303021	0.312782	0.408061	0.299208	0.335363	0.29181	0.280588	0.245511	0.29787	0.265718	0.0947441	0.0862471	0.0797505	0.0823056	0.0848395	0.103126	0.190321	0.216129	0.19715
NMW0128	Phenol, 4-(1-methylpropyl)-	Phenol	C10H14O	99-71-8	0.112877	0.106126	0.115933	0.10231	0.105594	0.0905718	0.347146	0.39493	0.330179	0.369366	0.518682	0.413539	0.504779	0.44109	0.561644	0.560606	0.452783	0.423045	0.0400907	0.0381461	0.0368478	0.0348469	0.0378985	0.0406319	0.218327	0.259745	0.236591
XMW0394	Phenol, 4-(1-phenylethyl)-	Phenol	C14H14O	1988-89-2	0.186776	0.155352	0.151184	0.145644	0.144367	0.130818	0.0971415	0.122834	0.093266	0.100486	0.132929	0.0936903	0.079723	0.0719506	0.0663847	0.0647905	0.0780075	0.065876	0.118086	0.105237	0.0989591	0.107474	0.102486	0.122176	0.121214	0.131663	0.0870887
D183	Phenol, 4-(2-aminoethyl)-	Phenol	C8H11NO	51-67-2	0.0688291	0.0394384	0.041728	0.0364839	0.0484941	0.0505669	0.0874537	0.0996108	0.0961493	0.0886546	0.0994375	0.0586956	0.0450374	0.0313827	0.0317915	0.0301341	0.0575788	0.0433534	0.0379442	0.0379499	0.0255968	0.0291164	0.0276924	0.0448247	0.0245086	0.0348563	0.033416
KMW0433	Phenol, 4-(2-propenyl)-	Aromatics	C9H10O	501-92-8	0.373036	0.360133	0.396128	0.337876	0.345814	0.3051	1.485	1.65035	1.42675	1.43919	1.79639	1.41431	2.25234	1.93234	1.92913	1.90278	2.10993	1.85489	0.0892681	0.0841852	0.0831318	0.0791721	0.0842237	0.0884253	0.793973	0.918146	0.870287
NMW0313	Phenol, 4-(3-hydroxy-1-propenyl)-2-methoxy-	Phenol	C10H12O3	458-35-5	7.72783	7.06657	7.15701	5.52632	7.14319	6.83427	5.89881	7.29582	5.68929	6.09825	7.56358	5.43073	7.30728	6.48685	5.60826	5.95807	5.98054	5.70103	6.37928	6.43451	5.48757	5.89482	5.76048	6.97505	6.08574	7.53064	7.18214
KMW0703	Phenol, 4-ethyl-	Phenol	C8H10O	123-07-9	0.0371287	0.0337322	0.0360114	0.0294885	0.0341115	0.0277911	0.123398	0.138605	0.115824	0.117197	0.128034	0.0788739	0.11734	0.0996742	0.089829	0.095766	0.118473	0.0935452	0.0148187	0.0151244	0.0126158	0.0138704	0.0146641	0.0187872	0.0776382	0.0780822	0.0582312
KMW0469	Phenol, 4-ethyl-2-methoxy-	Phenol	C9H12O2	2785-89-9	5.5504	5.33057	6.00623	5.26362	5.24671	4.87753	20.7751	23.7084	19.9496	20.691	26.1696	20.2853	20.2007	18.0879	17.293	17.2963	19.4778	16.7345	4.79086	4.49887	4.3802	4.37395	4.41893	4.87124	10.5869	12.3305	11.4447
NMW0291	Phenol, 4-heptyl-	Phenol	C13H20O	1987-50-4	0.214384	0.133219	0.13952	0.122973	0.150565	0.154823	0.322838	0.273321	0.358896	0.324256	0.383562	0.17126	0.0174227	0.0154398	0.0151143	0.015111	0.220935	0.0151901	0.109819	0.0943026	0.0809411	0.0874481	0.0691527	0.163904	0.0904299	0.0999046	0.122623
XMW0791	Phenol, 4-methyl-2-nitro-	Phenol	C7H7NO3	119-33-5	0.10629	0.100727	0.095851	0.0969074	0.0962082	0.0894732	0.0738625	0.0828954	0.0582978	0.0705531	0.0924538	0.0617432	0.0442865	0.00784924	0.00768373	0.0631727	0.00923039	0.00772229	0.0937283	0.0942147	0.10046	0.0897807	0.0862298	0.0983298	0.0792145	0.0912337	0.0750375
NMW0202	Phenol, 4-pentyl-	Phenol	C11H16O	14938-35-3	4.73417	4.16265	4.73496	4.15699	4.38086	3.94556	1.40689	1.9327	1.31399	1.72506	1.88296	1.15749	2.27453	2.06602	1.43977	1.84698	2.15345	1.69637	2.69969	2.46528	2.34044	2.43362	2.49235	2.80193	0.951963	1.04644	0.963326
NMW0105	Phenol, 4-propyl-	Phenol	C9H12O	645-56-7	0.42976	0.446938	0.486455	0.433193	0.427019	0.378511	0.800051	1.12063	0.722804	1.02874	1.32508	1.02794	1.22422	1.31475	1.04419	1.03935	1.43418	1.04781	0.222465	0.195139	0.201472	0.204641	0.229504	0.218256	0.60875	0.686204	0.661849
XMW0953	Phenylacetic acid propyl ester	Ester	C11H14O2	4606-15-9	0.489059	0.432634	0.505781	0.423999	0.476845	0.371246	0.847689	1.49228	0.768417	0.932424	1.2003	0.780486	0.525163	0.47201	0.437124	0.419016	0.531363	0.450831	0.214551	0.204584	0.154458	0.142595	0.196891	0.294684	0.52261	0.619229	0.500398
KMW0284	Phenylethyl Alcohol	Alcohol	C8H10O	60-12-8	0.994176	0.920312	0.970106	0.790823	0.923665	0.780221	5.25232	5.46549	5.162	5.07924	6.72979	3.6186	6.90794	6.32744	5.51392	5.65953	7.37765	5.12729	0.397805	0.39479	0.386878	0.375841	0.376808	0.440647	2.31826	2.29734	2.11979
NMW0110	Picolinamide	Heterocyclic compound	C6H6N2O	1452-77-3	0.299402	0.352834	0.393023	0.353362	0.349796	0.31012	0.754282	0.86197	0.561629	0.78301	1.02051	0.764049	1.10771	0.988487	0.94591	0.948272	1.07925	0.933423	0.186803	0.160301	0.168518	0.17107	0.192375	0.181273	0.488218	0.547425	0.531295
WMW0014	Pinocamphone	Terpenoids	C10H16O	547-60-4	0.242543	0.148757	0.145914	0.118792	0.158998	0.14934	0.267085	0.279305	0.31953	0.238424	0.318292	0.143342	0.196328	0.165666	0.168487	0.175672	0.213794	0.173157	0.142439	0.142864	0.111407	0.114029	0.104269	0.197632	0.138167	0.131805	0.123957
WMW0005	Pinocarvone	Terpenoids	C10H14O	30460-92-5	0.144973	0.185131	0.189748	0.15887	0.185048	0.150618	0.576728	0.651598	0.549263	0.545182	0.611427	0.339838	0.54005	0.470516	0.416532	0.443577	0.548029	0.426508	0.102411	0.101133	0.0883935	0.0915984	0.0981524	0.117372	0.265248	0.266175	0.273713
XMW0309	Piperidin-3-one, 2,2,5-methyl-	Heterocyclic compound	C8H15NO	103634-57-7	0.0510998	0.0492415	0.046812	0.0458398	0.0468343	0.0434244	0.0291029	0.0351627	0.0263952	0.0293546	0.0370523	0.0284019	0.0348713	0.0291237	0.0284875	0.0300325	0.0268524	0.0269448	0.0487809	0.0474246	0.0423511	0.044677	0.0427276	0.050678	0.042746	0.048694	0.0430786
NMW0138	Piperonal	Aldehyde	C8H6O3	120-57-0	0.0149159	0.0104759	0.0150886	0.00977979	0.0120951	0.0181294	0.0147557	0.0149611	0.0113861	0.0175875	0.0173342	0.0123617	0.0159931	0.0158669	0.0121141	0.0132412	0.0196158	0.0148705	0.012291	0.0080376	0.00649598	0.00577246	0.00641802	0.00930674	0.0158004	0.0151081	0.0110887
XMW0892	Propanediamide	Amine	C3H6N2O2	108-13-4	0.0282224	0.0243962	0.0249677	0.0215448	0.0245891	0.0216167	0.125899	0.128704	0.127902	0.122826	0.14635	0.0761172	0.110058	0.0980853	0.0901809	0.0928284	0.122017	0.0832456	0.00509833	0.00489659	0.00462364	0.00463095	0.00457709	0.00517885	0.0379106	0.0326961	0.0355428
XMW1207	Propanedioic acid, amino-, diethyl ester	Ester	C7H13NO4	6829-40-9	0.00360833	0.00316871	0.00345005	0.00302886	0.00340187	0.00304225	0.019033	0.0220069	0.0191349	0.0191643	0.0238079	0.0184782	0.0284253	0.0253007	0.0242747	0.0237015	0.0274142	0.0226366	0.00246695	0.00234946	0.00238148	0.00232022	0.00251463	0.00285003	0.00934151	0.00946777	0.00958606
XMW0102	Propanenitrile, 3-(butylphenylamino)-	Nitrogen compounds	C13H18N2	61852-40-2	0.0805453	0.0709818	0.0779509	0.0707197	0.078352	0.0739894	0.14854	0.186773	0.165329	0.149581	0.199354	0.120884	0.103648	0.102079	0.0979074	0.093525	0.123947	0.0915702	0.0573003	0.0567155	0.0461574	0.0495706	0.0443252	0.0544891	0.0624067	0.0748889	0.0852241
D179	Propanoic Acid, 2-oxo-	Acid	C3H4O3	127-17-3	0.221866	0.207355	0.215637	0.216096	0.217754	0.206755	0.136509	0.242292	0.173066	0.181377	0.231022	0.176143	0.214614	0.183498	0.172572	0.122624	0.172854	0.169364	0.202214	0.226559	0.210639	0.207691	0.182911	0.238047	0.189217	0.213278	0.190498
D240	Propanoic acid, 2,2-dimethyl-, pentyl ester	Ester	C10H20O2	2313-68-0	1.31069	1.25815	1.26971	1.24376	1.26198	1.17794	13.443	14.4462	12.2695	13.6872	16.4313	12.4824	13.243	11.6651	11.3255	11.1665	12.7602	10.9415	1.47161	1.41337	1.33459	1.3367	1.32115	1.49485	6.46796	7.24201	6.95363
XMW1209	Propanoic acid, 2-methyl-, 2-methylbutyl ester	Ester	C9H18O2	2445-69-4	0.0525903	0.048928	0.0500481	0.0503519	0.0514272	0.04913	0.0529384	0.0516898	0.0490954	0.0521213	0.0529384	0.0493148	0.0399036	0.0364404	0.0299977	0.0346323	0.0370311	0.0302214	0.0675383	0.066041	0.0549281	0.0578542	0.0570759	0.0717916	0.05041	0.0495939	0.0563769
D246	Propanoic acid, 2-methyl-, 3,7-dimethyl-2,6-octadienyl ester, (Z)-	Ester	C14H24O2	2345-24-6	0.772	0.875633	0.758521	0.885113	0.944923	0.854998	0.833231	0.910094	0.797808	0.816385	1.08813	0.685818	3.01424	2.67992	2.56594	2.44629	2.93673	2.39428	0.265137	0.242025	0.23178	0.229423	0.228121	0.274932	0.588842	0.698525	0.652188
XMW0617	Propanoic acid, 2-methyl-, 3-hydroxy-2,2,4-trimethylpentyl ester	Ester	C12H24O3	77-68-9	0.0226351	0.0184367	0.0557093	0.0499508	0.0311919	0.0189335	0.0175807	0.0201783	0.0278332	0.0115512	0.0192797	0.0104663	0.0126209	0.011352	0.0105422	0.0110438	0.0128021	0.0110636	0.00214908	0.00206404	0.00194899	0.00195207	0.00192936	0.00218302	0.0171202	0.0204288	0.0160072
D157	Propanoic acid, 2-methyl-, 3-phenyl-2-propenyl ester	Ester	C13H16O2	103-59-3	0.142057	0.102896	0.124433	0.13678	0.114148	0.111693	0.250884	0.325259	0.26764	0.258333	0.337064	0.182354	0.183251	0.167046	0.163707	0.14763	0.201497	0.143814	0.1182	0.116371	0.0972201	0.104092	0.0977121	0.138581	0.128693	0.140841	0.135996
XMW1199	Propanoic acid, 2-methyl-, butyl ester	Ester	C8H16O2	97-87-0	0.0137191	0.0109723	0.00263354	0.00878501	0.0120448	0.010108	0.0174709	0.0242789	0.017447	0.0201542	0.0180345	0.0138629	0.0146361	0.0143945	0.0149643	0.0131466	0.00381609	0.0129796	0.00965169	0.00225268	0.00803719	0.00204129	0.00736334	0.0128491	0.0118506	0.012117	0.0110927
XMW0695	Propanoic acid, 2-methyl-, octyl ester	Ester	C12H24O2	109-15-9	0.00703894	0.00609508	0.00750481	0.0064415	0.00635496	0.00527726	0.0118234	0.0205318	0.0107835	0.0136244	0.0162874	0.0109518	0.00762753	0.00662636	0.00617749	0.00606262	0.0081031	0.00644897	0.00334695	0.00302862	0.00243298	0.00217545	0.00273743	0.00411007	0.00773047	0.00938285	0.00717869
NMW0054	Propanoic acid, 3-(methylthio)-	Sulfur compounds	C4H8O2S	646-01-5	0.0444935	0.0427099	0.0431025	0.0422213	0.04284	0.0399871	0.374132	0.40261	0.360867	0.375239	0.451694	0.333877	0.57091	0.501319	0.483081	0.4869	0.553614	0.475129	0.0499561	0.0479793	0.0453048	0.0453764	0.0448486	0.050745	0.206211	0.23677	0.236052
D188	Pyrazinamide	Heterocyclic compound	C5H5N3O	98-96-4	0.198414	0.187681	0.177394	0.176371	0.180308	0.163574	0.176103	0.157328	0.167544	0.168956	0.216115	0.167395	0.129365	0.110232	0.104519	0.111773	0.103266	0.10066	0.182419	0.180433	0.162734	0.173079	0.163689	0.191363	0.167196	0.186918	0.165879
KMW0351	Pyrazine, 2,3-diethyl-5-methyl-	Heterocyclic compound	C9H14N2	18138-04-0	0.00437063	0.00432081	0.00472075	0.00448123	0.00452616	0.00381381	0.00286436	0.00287321	0.00301048	0.00269018	0.00557255	0.00402632	0.00630066	0.00553639	0.00516475	0.00513926	0.00634776	0.00403119	0.00445299	0.00409039	0.00434293	0.00442407	0.00418857	0.00418885	0.00548279	0.00613609	0.00685866
KMW0132	Pyrazine, 2,3-dimethyl-	Heterocyclic compound	C6H8N2	5910-89-4	0.226309	0.223266	0.251754	0.228787	0.235677	0.223101	0.763582	0.761802	0.714913	0.803322	0.875926	0.727309	0.961959	0.907715	0.857372	0.8242	0.92444	0.839163	0.0804296	0.0730326	0.0763403	0.0772242	0.0807822	0.0749088	0.438428	0.481494	0.484387
D359	Pyrazine, 2,3-dimethyl-5-(1-methylpropyl)-	Heterocyclic compound	C10H16N2	32263-00-6	0.0129689	0.00819333	0.00979085	0.00880567	0.000720587	0.0107707	0.0409737	0.000874915	0.0432483	0.0453342	0.0521404	0.000794748	0.0318333	0.0294349	0.000824392	0.0277308	0.000990334	0.0323598	0.00477565	0.00452444	0.00381022	0.00076325	0.00452148	0.00651136	0.0145626	0.0166713	0.0212597
KMW0268*022	Pyrazine, 2-ethyl-3,5-dimethyl-	Heterocyclic compound	C8H12N2	13925-07-0	1.62516	1.56002	1.57435	1.54217	1.56477	1.46056	14.0151	15.5538	13.1517	14.2149	17.4691	13.3036	10.318	15.5812	17.1097	17.0545	20.8475	16.885	1.82469	1.75249	1.6548	1.65741	1.63814	1.85351	8.44561	9.60295	9.29166
KMW0241*014	Pyrazine, 2-ethyl-3-methyl-	Heterocyclic compound	C7H10N2	15707-23-0	0.280099	0.273675	0.29367	0.285622	0.26922	0.261338	0.318531	0.316134	0.292207	0.329012	0.0350761	0.393512	0.415861	0.386783	0.381462	0.368299	0.414789	0.36416	0.141601	0.143023	0.136163	0.13164	0.146561	0.14551	0.240476	0.25931	0.250648
KMW0183*014	Pyrazine, 2-ethyl-5-methyl-	Heterocyclic compound	C7H10N2	13360-64-0	0.280099	0.273675	0.29367	0.285622	0.26922	0.261338	0.318531	0.316134	0.292207	0.329012	0.0350761	0.393512	0.415861	0.386783	0.381462	0.368299	0.414789	0.36416	0.141601	0.143023	0.136163	0.13164	0.146561	0.14551	0.240476	0.25931	0.250648
KMW0286	Pyrazine, 2-methoxy-3-(1-methylethyl)-	Heterocyclic compound	C8H12N2O	25773-40-4	6.63672	6.37069	6.42923	6.2978	6.39009	5.96454	54.9859	59.707	47.4252	55.3129	67.6043	51.3553	42.136	60.06	43.2546	45.6033	64.7358	45.0188	7.45153	7.15667	6.75773	6.76842	6.6897	7.56921	34.6004	39.1546	37.4007
KMW0363	Pyrazine, 2-methoxy-3-(1-methylpropyl)-	Heterocyclic compound	C9H14N2O	24168-70-5	0.138751	0.21071	0.225752	0.196811	0.209838	0.124665	0.613976	0.854344	0.584701	0.612264	0.897677	0.724086	0.919788	0.835831	0.788001	0.793143	0.830288	0.763499	0.170935	0.162428	0.160404	0.164479	0.161268	0.172859	0.387212	0.49954	0.468074
D321*125	Pyrazine, 2-methoxy-3-methyl-	Heterocyclic compound	C6H8N2O	2847-30-5	0.0168057	0.0142906	0.0152263	0.0134059	0.013564	0.0141378	0.0281933	0.029158	0.0291928	0.0277477	0.0318925	0.0227306	0.0316155	0.0291141	0.0265619	0.0275768	0.0324776	0.0268277	0.0113808	0.0119823	0.011719	0.0115494	0.0105969	0.0102444	0.0159769	0.0150178	0.0150796
D324*125	Pyrazine, 2-methoxy-6-methyl-	Heterocyclic compound	C6H8N2O	2882-21-5	0.0168057	0.0142906	0.0152263	0.0134059	0.013564	0.0141378	0.0281933	0.029158	0.0291928	0.0277477	0.0318925	0.0227306	0.0316155	0.0291141	0.0265619	0.0275768	0.0324776	0.0268277	0.0113808	0.0119823	0.011719	0.0115494	0.0105969	0.0102444	0.0159769	0.0150178	0.0150796
D323*087	Pyrazine, 2-methyl-3-(methylthio)-	Heterocyclic compound	C6H8N2S	2882-20-4	0.00126213	0.000187975	0.000189703	0.00138831	0.00137917	0.00135101	0.00508536	0.00541166	0.00458732	0.00501004	0.00628195	0.00520403	0.0052905	0.00466718	0.00477847	0.00470434	0.0052052	0.00441128	0.0011889	0.00114405	0.000996978	0.00108193	0.00100877	0.00131297	0.0108586	0.0120278	0.0113328
KMW0244	Pyrazine, 2-methyl-5-(1-methylethyl)-	Heterocyclic compound	C8H12N2	13925-05-8	18.0356	17.3126	17.4718	17.1146	17.3654	16.2089	178.268	190.712	167.513	179.869	216.079	166.777	175.078	155.847	149.552	147.313	173.883	144.548	20.2499	19.4486	18.3645	18.3935	18.1796	20.5697	87.1327	97.0671	95.6847
D326*087	Pyrazine, 2-methyl-6-(methylthio)-	Heterocyclic compound	C6H8N2S	2884-13-1	0.00126213	0.000187975	0.000189703	0.00138831	0.00137917	0.00135101	0.00508536	0.00541166	0.00458732	0.00501004	0.00628195	0.00520403	0.0052905	0.00466718	0.00477847	0.00470434	0.0052052	0.00441128	0.0011889	0.00114405	0.000996978	0.00108193	0.00100877	0.00131297	0.0108586	0.0120278	0.0113328
KMW0264*022	Pyrazine, 3-ethyl-2,5-dimethyl-	Heterocyclic compound	C8H12N2	13360-65-1	1.62516	1.56002	1.57435	1.54217	1.56477	1.46056	14.0151	15.5538	13.1517	14.2149	17.4691	13.3036	10.318	15.5812	17.1097	17.0545	20.8475	16.885	1.82469	1.75249	1.6548	1.65741	1.63814	1.85351	8.44561	9.60295	9.29166
XMW1309	Pyrazine, tetramethyl-	Heterocyclic compound	C8H12N2	1124-11-4	0.170705	0.163862	0.165368	0.161988	0.164362	0.153416	1.08419	1.50034	1.07692	0.999117	1.19211	0.906386	2.46861	2.5223	2.17884	2.17251	2.76966	2.16071	0.191663	0.184079	0.173818	0.174093	0.172068	0.19469	1.04657	1.23072	1.17799
KMW0190	Pyrazine, trimethyl-	Heterocyclic compound	C7H10N2	14667-55-1	0.145905	0.116115	0.150027	0.130129	0.147747	0.144012	0.178891	0.188043	0.213281	0.173247	0.186977	0.0839051	0.103513	0.126927	0.088062	0.127761	0.162748	0.126373	0.0767191	0.0782699	0.0685833	0.0705446	0.0677439	0.0998592	0.100921	0.0977985	0.0964989
XMW0028	Pyridine, 2,3,4,5-tetrahydro-6-propyl-	Heterocyclic compound	C8H15N	1604-01-9	0.0121447	0.0126247	0.0110006	0.0120659	0.0113782	0.0112171	0.0292344	0.0338436	0.0300059	0.0290376	0.0337726	0.0208725	0.0354544	0.0307511	0.0290793	0.0308428	0.0308661	0.0296508	0.00947509	0.00692548	0.00927245	0.0071724	0.00966453	0.00932443	0.0177172	0.0136664	0.0172358
XMW0651	Pyridine, 2,3-dimethyl-	Heterocyclic compound	C7H9N	583-61-9	0.400698	0.410493	0.451616	0.416301	0.418919	0.388561	1.94201	2.01167	1.81363	2.02912	2.30379	1.95652	2.08688	1.94856	1.8165	1.75309	1.97484	1.82613	0.264742	0.243325	0.25842	0.25758	0.27457	0.246183	0.905009	0.990534	1.01883
NMW0185	Pyridine, 3-(3,4-dihydro-2H-pyrrol-5-yl)-	Heterocyclic compound	C9H10N2	532-12-7	1.31466	1.20456	1.30197	1.18621	1.24168	1.12509	2.76246	3.19331	2.62351	2.87665	3.69627	2.48227	2.98704	2.67686	2.55311	2.47257	2.94879	2.31509	0.280705	0.269597	0.254569	0.254972	0.252006	0.285138	1.66256	1.90545	1.72877
XMW0522	Pyridine, 3-propyl-	Heterocyclic compound	C8H11N	4673-31-8	0.705027	0.721359	0.818927	0.765563	0.749897	0.695428	3.49487	3.66467	3.13835	3.613	4.16027	2.02139	3.76939	3.39472	3.22385	3.14051	3.60489	3.12917	0.469278	0.430749	0.451056	0.45864	0.487572	0.447734	1.42279	1.22028	1.53647
NMW0099	Quinoline	Heterocyclic compound	C9H7N	91-22-5	0.00247637	0.00233133	0.00212103	0.00221837	0.00217158	0.00204439	0.0121214	0.0143106	0.0105126	0.0112746	0.0135556	0.00995592	0.0173546	0.0154675	0.0137488	0.015118	0.0149709	0.0143926	0.00157763	0.00143432	0.0014778	0.00132213	0.00151573	0.00176557	0.0052014	0.00603833	0.00591593
XMW0038	Quinoline, 2,7-dimethyl-	Heterocyclic compound	C11H11N	93-37-8	0.0389139	0.00309274	0.00312116	0.0343483	0.00310216	0.031295	0.034708	0.0375279	0.0251322	0.0324915	0.041207	0.0266112	0.0229373	0.0182938	0.0177452	0.0203732	0.0231713	0.019102	0.00361745	0.00347431	0.00328064	0.00328583	0.00324761	0.00367458	0.0232892	0.0275304	0.021689
NMW0125	Salicylic Acid	Acid	C7H6O3	69-72-7	0.752172	0.724117	0.80953	0.710386	0.714119	0.657107	2.85331	3.24495	2.75	2.84156	3.56349	2.7935	2.7596	2.47138	2.37488	2.36581	2.69844	2.30919	0.659557	0.623415	0.603906	0.599795	0.607987	0.673394	1.40626	1.65494	1.56801
WMW0022	Salvial-4(14)-en-1-one	Terpenoids	C15H24O	73809-82-2	0.292491	0.140908	0.147997	0.130858	0.154829	0.152914	0.675975	0.822358	0.741282	0.666742	0.881716	0.473347	0.416867	0.420921	0.441404	0.375785	0.607098	0.389559	0.19128	0.196895	0.153917	0.160087	0.142308	0.254577	0.219579	0.188897	0.278279
NMW0299*099	Santalol, E-cis,epi-.beta.-	Terpenoids	C15H24O	14490-17-6	0.0313605	0.0270661	0.0309029	0.0281726	0.0289575	0.0269277	0.0378482	0.0475667	0.0387803	0.0396181	0.0526685	0.0493402	0.0456418	0.0387047	0.0381874	0.0361739	0.0495628	0.0350747	0.0182431	0.015757	0.0127266	0.013872	0.0133102	0.0191025	0.0254179	0.0299839	0.0308135
XMW0885*009	Santolina triene	Hydrocarbons	C10H16	2153-66-4	0.0262019	0.0296851	0.0336233	0.0198717	0.0305842	0.0198343	0.0704419	0.0593181	0.0646968	0.0696029	0.127731	0.0685611	0.0760494	0.0754338	0.0703767	0.0685954	0.067737	0.0712103	0.0150065	0.00897079	0.00995812	0.0101801	0.0104842	0.0143421	0.0337384	0.0558093	0.0411027
D438	Sesquirosefuran	Heterocyclic compound	C15H22O	39007-93-7	0.395021	0.379186	0.382671	0.374848	0.380341	0.355012	4.30788	3.8817	4.1753	3.67286	5.45663	4.288	4.28532	3.62359	3.55124	2.93564	5.08952	3.5524	0.443519	0.425968	0.402223	0.40286	0.398174	0.450523	1.63222	3.0949	2.86259
WMW0148	Spiro[4.5]dec-7-ene, 1,8-dimethyl-4-(1-methylethenyl)-, [1S-(1.alpha.,4.beta.,5.alpha.)]-	Terpenoids	C15H24	24048-44-0	3.19322	2.8018	3.11174	2.81345	2.92661	2.6664	7.15893	8.38834	6.71453	7.44706	9.46522	6.01893	8.73316	7.76563	7.50975	6.65711	7.991	6.45508	1.72755	1.47677	1.39728	1.57733	1.49067	1.79063	3.92718	4.63833	4.14738
XMW0156	Spiro[4.5]decan-7-one, 1,8-dimethyl-4-(1-methylethyl)-	Ketone	C15H26O	39510-26-4	0.0629262	0.0644588	0.0632468	0.0575618	0.057717	0.053352	0.0800814	0.102728	0.0818246	0.0842851	0.10812	0.0839596	0.0647922	0.0596103	0.0581613	0.0559064	0.0713231	0.0540594	0.0190597	0.0200668	0.0190085	0.0170921	0.0163161	0.0242455	0.0460253	0.0606927	0.0595722
XMW0111	Spiro[4.5]decan-7-one, 1,8-dimethyl-8,9-epoxy-4-isopropyl-	Terpenoids	C15H24O2	61050-91-7	0.055532	0.0356975	0.0395725	0.03232	0.0396679	0.0404757	0.0545012	0.0654806	0.0623678	0.0555435	0.0692369	0.0381323	0.0190597	0.0337941	0.024201	0.0239386	0.0262252	0.0241792	0.0281368	0.031301	0.0231015	0.0233054	0.0205274	0.0402871	0.0217503	0.0230208	0.026966
GMW0369	Spiro[5.5]undec-2-ene, 3,7,7-trimethyl-11-methylene-, (-)-	Terpenoids	C15H24	18431-82-8	3.64532	3.16852	3.68097	3.18911	3.3419	3.0424	6.05999	6.99212	5.54755	6.3542	7.85074	5.13602	9.78256	8.65162	8.27585	7.66032	9.18267	7.44839	1.79371	1.604	1.54642	1.62677	1.65688	1.82471	4.44665	4.86998	4.34427
D386	Squamulosone	Terpenoids	C15H22O	34413-94-0	0.0414601	0.0120937	0.0202672	0.0208492	0.020832	0.011601	0.0175667	0.0212272	0.01782	0.0169567	0.0206092	0.00258502	0.0240938	0.0198678	0.0193617	0.019586	0.0261187	0.0179818	0.0309345	0.0303834	0.0266756	0.0288102	0.026325	0.0333843	0.0166504	0.0159322	0.0129145
KMW0115	Styrene	Aromatics	C8H8	100-42-5	0.00531707	0.00642311	0.00734474	0.0059295	0.00624414	0.00566462	0.00681213	0.00766147	0.00615116	0.00682107	0.00883048	0.00882318	0.00763598	0.00739731	0.00740855	0.00717909	0.00949892	0.00786625	0.00568918	0.00521739	0.00691739	0.00570264	0.00564345	0.00543626	0.00877963	0.00900331	0.00929861
NMW0100	Succinimide	Heterocyclic compound	C4H5NO2	123-56-8	0.0726867	0.0690111	0.071081	0.0666117	0.0718896	0.0620419	0.0615978	0.0772488	0.0547547	0.0659146	0.096487	0.067785	0.0725835	0.0662958	0.0575036	0.0598722	0.065943	0.0572554	0.0648503	0.063561	0.0589368	0.0608195	0.0597014	0.0709739	0.0553821	0.0725684	0.0603455
WMW0172*091	TRANS-ANETHOLE	Aromatics	C10H12O	4180-23-8	0.00172623	0.00190512	0.0018554	0.00164175	0.001567	0.00188077	0.000236463	0.00027484	0.00023319	0.000249486	0.000326929	0.000249656	0.000298522	0.000264547	0.000258969	0.000258913	0.000311096	0.000260268	0.00150526	0.00149219	0.00119692	0.00134582	0.0013013	0.0016281	0.00560247	0.00662745	0.00656889
KMW0640	Tetradecanal	Aldehyde	C14H28O	124-25-4	0.136917	0.101122	0.097081	0.0855822	0.0936127	0.0936642	0.192089	0.166219	0.191672	0.207109	0.223717	0.180807	0.163781	0.151287	0.152371	0.13035	0.163814	0.1347	0.00990673	0.01211	0.0098217	0.0107058	0.0224448	0.0333458	0.118829	0.113515	0.0955578
KMW0551	Tetradecane	Hydrocarbons	C14H30	629-59-4	0.120161	0.113075	0.1361	0.123185	0.118394	0.120259	0.129731	0.152045	0.123393	0.0882901	0.15308	0.114179	0.0818033	0.117875	0.0886696	0.108511	0.131729	0.134767	0.100668	0.110057	0.0896679	0.101741	0.102728	0.125776	0.0999826	0.0868578	0.10204
XMW0419	Tetradecane, 2-methyl-	Hydrocarbons	C15H32	1560-95-8	0.578415	0.475534	0.568051	0.511784	0.533966	0.489137	0.76738	1.17407	0.726935	1.02133	1.02783	0.62253	1.08156	0.970292	0.796404	0.864317	1.20496	0.983554	0.39664	0.348832	0.353341	0.334651	0.377155	0.392801	0.672503	0.725162	0.684196
KMW0184	Thiazole, 2,4,5-trimethyl-	Heterocyclic compound	C6H9NS	13623-11-5	0.00621321	0.00516148	0.00577173	0.00561288	0.00607444	0.00498078	0.00967087	0.00978138	0.00921411	0.00996326	0.0107122	0.00056528	0.000675923	0.000598996	0.00871852	0.00058624	0.00998098	0.00880138	0.00326881	0.00328515	0.00317825	0.00298985	0.00268281	0.00356764	0.00586443	0.00556524	0.00585994
NMW0135	Thiocyanic acid, phenylmethyl ester	Sulfur compounds	C8H7NS	3012-37-1	0.0684048	0.0642506	0.0723808	0.0573	0.0679646	0.0503853	0.118	0.167594	0.109204	0.133801	0.170218	0.143873	0.0976915	0.0837094	0.0811167	0.0783117	0.0995482	0.0829365	0.0319193	0.0314222	0.0233129	0.0209852	0.0293661	0.0423992	0.0696736	0.0868898	0.069178
KMW0277	Thiophene, 2-pentyl-	Heterocyclic compound	C9H14S	4861-58-9	0.426358	0.255232	0.268268	0.216877	0.297891	0.291352	1.484	1.45434	1.52291	1.68565	1.29548	0.716591	1.0957	1.02074	1.0088	0.929758	1.10275	0.979634	0.183012	0.158496	0.132568	0.141793	0.161364	0.224019	0.502736	0.53566	0.552364
XMW0517	Thiophene, 3-ethyl-	Heterocyclic compound	C6H8S	1795-01-3	0.311278	0.301142	0.307151	0.315512	0.307992	0.323689	0.323957	0.308114	0.326319	0.323032	0.308452	0.319354	0.351402	0.334939	0.324824	0.339956	0.321775	0.323672	0.317871	0.332091	0.317905	0.333046	0.330908	0.328465	0.313333	0.295052	0.333877
WMW0025*045	Thymol	Terpenoids	C10H14O	89-83-8	0.535613	0.536644	0.557396	0.526629	0.517008	0.466771	0.6571	0.700098	0.584437	0.673927	0.860944	0.730305	0.907012	0.820174	0.711778	0.710685	1.04614	0.70444	0.614711	0.574767	0.567663	0.571366	0.548693	0.603863	0.570882	0.710369	0.782122
NMW0288	Tolbutamide	Others	C12H18N2O3S	64-77-7	0.176247	0.0697349	0.111134	0.0659226	0.120611	0.0793971	0.27677	0.23617	0.303912	0.276065	0.328017	0.19248	0.162252	0.151324	0.147629	0.140232	0.19359	0.141858	0.107242	0.108613	0.0836224	0.0878024	0.081781	0.109296	0.0798592	0.110414	0.101785
D138	Triacetin	Ester	C9H14O6	102-76-1	0.00271052	0.00277916	0.00353298	0.00321771	0.00304573	0.00263109	0.00733083	0.00924018	0.00562103	0.00859592	0.0118351	0.0105763	0.0035309	0.00311373	0.00276328	0.00306211	0.00283314	0.00268757	0.000794727	0.00065788	0.00101957	0.000716021	0.000964363	0.000777361	0.00448431	0.00583381	0.00572493
XMW1158	Tricyclo[3.3.1.1(3,7)]decane, 2-nitro-	Nitrogen compounds	C10H15NO2	54564-31-7	0.00644003	0.00430125	0.00454697	0.00321351	0.000450918	0.00403946	0.0275554	0.000547491	0.0230731	0.020301	0.000651256	0.000497325	0.0247732	0.0234166	0.0182924	0.0220376	0.0229946	0.0223229	0.00329864	0.00295046	0.00240183	0.00238807	0.00254028	0.00437878	0.0103633	0.0112102	0.00855077
XMW0822*056	Tricyclo[4.4.0.02,7]decane, 1-methyl-3-methylene-8-(1-methylethyl)-, stereoisomer	Terpenoids	C15H24	18252-44-3	36.2324	33.5092	35.8864	32.946	33.9461	31.1176	31.1113	84.1435	67.9344	74.6427	95.6135	65.2702	78.1049	70.5095	67.1523	64.0494	76.5815	61.472	6.94583	6.67098	6.29911	6.30908	6.2357	7.05552	45.8525	51.6894	46.6785
KMW0598	Tridecanal	Aldehyde	C13H26O	10486-19-8	0.177079	0.16003	0.175635	0.150883	0.169848	0.155703	0.29872	0.35013	0.286025	0.359404	0.394116	0.322751	0.800279	0.698821	0.668296	0.546085	0.65405	0.570552	0.207524	0.219888	0.198818	0.193886	0.187519	0.217366	0.195508	0.294932	0.279126
KMW0488	Tridecane	Hydrocarbons	C13H28	629-50-5	4.18628	3.58695	4.11686	2.8775	3.84553	2.84675	7.79332	8.31668	7.30489	7.89542	10.1866	5.97019	8.60867	7.62119	7.20657	6.75037	8.3104	6.38771	2.7089	2.44993	2.3557	2.47094	2.4976	2.86508	4.47047	5.28319	4.39816
XMW0258	Tridecane, 2-methyl-	Hydrocarbons	C14H30	1560-96-9	0.0126869	0.0101721	0.0109373	0.00982999	0.0109023	0.0104871	0.0340254	0.0409759	0.0322098	0.0333283	0.0390401	0.0342866	0.0350745	0.0349297	0.0327239	0.0334689	0.0413865	0.0373779	0.00944315	0.0116136	0.00898963	0.0103622	0.00998757	0.0132149	0.00826486	0.010462	0.0113521
XMW0372	Tridecane, 4,8-dimethyl-	Hydrocarbons	C15H32	55030-62-1	0.011058	0.00973007	0.01087	0.00954762	0.0120243	0.00934799	0.0310342	0.0356264	0.0288115	0.0315012	0.0417588	0.0248308	0.0424563	0.0384432	0.0376802	0.0360217	0.0414002	0.0325671	0.205796	0.194147	0.186528	0.190211	0.196983	0.189939	0.0529779	0.0661175	0.054557
KMW0483	Undecanal	Aldehyde	C11H22O	112-44-7	0.213462	0.182939	0.211304	0.176779	0.196654	0.177913	0.357774	0.377541	0.334917	0.367718	0.473675	0.290883	0.558933	0.357739	0.338578	0.327453	0.425299	0.312088	0.196446	0.176375	0.168035	0.177708	0.179609	0.206625	0.303968	0.322644	0.291507
KMW0306	Undecane	Hydrocarbons	C11H24	1120-21-4	7.95164	7.20305	9.42049	6.92949	8.80635	6.83079	17.7256	16.6138	14.1604	18.096	20.1609	12.3362	1.34728	1.19395	1.16877	1.16853	1.40404	1.17464	6.22616	5.72081	5.57585	5.59845	5.83199	6.2886	8.6247	10.5486	9.23885
XMW0367*041	Undecane, 2,4-dimethyl-	Hydrocarbons	C13H28	17312-80-0	0.0422262	0.036476	0.0409268	0.0400237	0.0407066	0.0342279	0.0328225	0.0385107	0.0323649	0.0430387	0.0408387	0.0395873	0.0320052	0.0295419	0.0263194	0.0284519	0.0314485	0.0284649	0.0348519	0.0400184	0.0310308	0.0362466	0.036667	0.0443454	0.0310087	0.0357456	0.0376988
XMW0243*041	Undecane, 2,5-dimethyl-	Hydrocarbons	C13H28	17301-22-3	0.0422262	0.036476	0.0409268	0.0400237	0.0407066	0.0342279	0.0328225	0.0385107	0.0323649	0.0430387	0.0408387	0.0395873	0.0320052	0.0295419	0.0263194	0.0284519	0.0314485	0.0284649	0.0348519	0.0400184	0.0310308	0.0362466	0.036667	0.0443454	0.0310087	0.0357456	0.0376988
XMW0414*041	Undecane, 2,6-dimethyl-	Hydrocarbons	C13H28	17301-23-4	0.0422262	0.036476	0.0409268	0.0400237	0.0407066	0.0342279	0.0328225	0.0385107	0.0323649	0.0430387	0.0408387	0.0395873	0.0320052	0.0295419	0.0263194	0.0284519	0.0314485	0.0284649	0.0348519	0.0400184	0.0310308	0.0362466	0.036667	0.0443454	0.0310087	0.0357456	0.0376988
XMW0420*041	Undecane, 2,9-dimethyl-	Hydrocarbons	C13H28	17301-26-7	0.0422262	0.036476	0.0409268	0.0400237	0.0407066	0.0342279	0.0328225	0.0385107	0.0323649	0.0430387	0.0408387	0.0395873	0.0320052	0.0295419	0.0263194	0.0284519	0.0314485	0.0284649	0.0348519	0.0400184	0.0310308	0.0362466	0.036667	0.0443454	0.0310087	0.0357456	0.0376988
XMW0499	Undecane, 3,4-dimethyl-	Hydrocarbons	C13H28	17312-78-6	0.132331	0.125339	0.119726	0.119031	0.123279	0.111248	0.0845407	0.0929428	0.0826527	0.0845526	0.110037	0.0817297	0.100258	0.0879127	0.0832144	0.0851234	0.0823128	0.0809441	0.125906	0.123734	0.11127	0.117388	0.110914	0.130715	0.080802	0.090459	0.0819926
XMW0943*041	Undecane, 3,5-dimethyl-	Hydrocarbons	C13H28	17312-81-1	0.0422262	0.036476	0.0409268	0.0400237	0.0407066	0.0342279	0.0328225	0.0385107	0.0323649	0.0430387	0.0408387	0.0395873	0.0320052	0.0295419	0.0263194	0.0284519	0.0314485	0.0284649	0.0348519	0.0400184	0.0310308	0.0362466	0.036667	0.0443454	0.0310087	0.0357456	0.0376988
XMW0609*041	Undecane, 3,6-dimethyl-	Hydrocarbons	C13H28	17301-28-9	0.0422262	0.036476	0.0409268	0.0400237	0.0407066	0.0342279	0.0328225	0.0385107	0.0323649	0.0430387	0.0408387	0.0395873	0.0320052	0.0295419	0.0263194	0.0284519	0.0314485	0.0284649	0.0348519	0.0400184	0.0310308	0.0362466	0.036667	0.0443454	0.0310087	0.0357456	0.0376988
XMW0502*037	Undecane, 3,8-dimethyl-	Hydrocarbons	C13H28	17301-30-3	0.0631043	0.151107	0.174013	0.149226	0.0675294	0.149931	0.189628	0.20895	0.180458	0.198797	0.278812	0.232508	0.356433	0.332395	0.302987	0.299345	0.351206	0.291657	0.151865	0.160718	0.145438	0.150541	0.15067	0.0679869	0.167481	0.212233	0.186387
XMW0242*037	Undecane, 3,9-dimethyl-	Hydrocarbons	C13H28	17301-31-4	0.0631043	0.151107	0.174013	0.149226	0.0675294	0.149931	0.189628	0.20895	0.180458	0.198797	0.278812	0.232508	0.356433	0.332395	0.302987	0.299345	0.351206	0.291657	0.151865	0.160718	0.145438	0.150541	0.15067	0.0679869	0.167481	0.212233	0.186387
XMW0238	Undecane, 4,4-dimethyl-	Hydrocarbons	C13H28	17312-68-4	0.0432917	0.0430429	0.0406896	0.0344339	0.0342923	0.0366687	0.0275111	0.0348255	0.0259838	0.0387578	0.0461913	0.0247921	0.0363979	0.0347483	0.0315902	0.0324628	0.0362402	0.0324641	0.0343395	0.0337329	0.032311	0.0309433	0.0358891	0.044081	0.0332678	0.0397417	0.0294935
XMW0602	Undecane, 5,7-dimethyl-	Hydrocarbons	C13H28	17312-83-3	0.0136049	0.0817849	0.0913114	0.0739843	0.088657	0.0791045	0.0750032	0.0916121	0.0755905	0.0746035	0.263118	0.467689	0.624087	0.1947	0.592075	0.567003	0.731195	0.472793	0.304384	0.073354	0.200612	0.213029	0.221328	0.0829296	0.314302	0.329565	0.317184
XMW0369*041	Undecane, 6-ethyl-	Hydrocarbons	C13H28	17312-60-6	0.0422262	0.036476	0.0409268	0.0400237	0.0407066	0.0342279	0.0328225	0.0385107	0.0323649	0.0430387	0.0408387	0.0395873	0.0320052	0.0295419	0.0263194	0.0284519	0.0314485	0.0284649	0.0348519	0.0400184	0.0310308	0.0362466	0.036667	0.0443454	0.0310087	0.0357456	0.0376988
KMW0485	Undecanoic acid, ethyl ester	Ester	C13H26O2	627-90-7	0.00111868	0.00107384	0.00108371	0.00106155	0.00107711	0.00100538	0.0162783	0.0218928	0.0147373	0.0164947	0.0217206	0.0284463	0.0115612	0.0107793	0.010033	0.01017	0.0104329	0.0082123	0.00125603	0.00120633	0.00113908	0.00114088	0.00112761	0.00127586	0.00480414	0.0056892	0.00700834
D422	Undecanol-5	Alcohol	C11H24O	37493-70-2	5.80483	5.68808	5.97325	5.50433	5.63306	5.043	18.2132	20.8318	17.6769	18.2836	23.466	17.9099	18.4093	16.2474	15.6814	15.5169	18.1057	15.2538	4.67302	4.4517	4.25851	4.20178	4.24578	4.6828	9.80923	11.684	10.9223
XMW0948	Valerena-4,7(11)-diene	Terpenoids	C15H24	351222-66-7	3.58111	3.15266	3.57251	3.135	3.30577	2.97172	7.89128	9.19458	7.48476	8.17721	10.4238	6.86585	3.30197	2.86969	2.6914	1.46386	8.88147	7.0983	2.03897	1.85493	1.76645	1.84332	1.88515	2.10693	4.72755	5.23448	4.67087
KMW0519	Vanillin	Aldehyde	C8H8O3	121-33-5	0.044825	0.0431679	0.0369895	0.0342632	0.041277	0.0541395	0.119377	0.159733	0.124116	0.13417	0.170959	0.127336	0.107851	0.092547	0.123192	0.108808	0.139798	0.147317	0.017896	0.0236671	0.0132209	0.0152864	0.00891788	0.0244362	0.040329	0.0591229	0.0562232
WMW0004*054	Ylangene	Terpenoids	C15H24	14912-44-8	0.0737093	0.0647795	0.0691012	0.0539189	0.0561828	0.0478927	0.117322	0.120431	0.107041	0.111917	0.128766	0.116544	0.143123	0.12636	0.121856	0.113596	0.129321	0.105643	0.0327254	0.0288121	0.0316105	0.0307633	0.0206096	0.0315449	0.0886381	0.0861575	0.0652031
NMW0294	Z-Butylidenephthalide	Hydrocarbons	C12H12O2	72917-31-8	0.0131196	0.00884194	0.011743	0.00865952	0.0112607	0.0101362	0.0320536	0.0293061	0.0347166	0.0278088	0.0319155	0.0240478	0.0206825	0.0185243	0.0183198	0.0180024	0.019147	0.0180803	0.00663908	0.00844756	0.00646751	0.00656182	0.00578175	0.00935935	0.0105105	0.00922666	0.0138045
XMW1470	[1,1'-Bicyclopentyl]-2-one	Ketone	C10H16O	4884-24-6	0.337081	0.388318	0.426743	0.394358	0.386199	0.346159	0.490742	0.538144	0.327251	0.493785	0.839633	0.480187	0.844445	0.756876	0.554094	0.556817	0.828321	0.540612	0.21411	0.192502	0.193624	0.208284	0.230282	0.219359	0.420365	0.470338	0.467318
XMW2700*146	[1S-(1.alpha.,2.alpha.,3a.beta.,4.alpha.,5.alpha.,7a.beta.,8S*)]-octahydro-1,7a-dimethyl-5-(1-methylethyl)-1,2,4-Metheno-1H-indene	Terpenoids	C15H24	22469-52-9	0.382229	0.330851	0.374496	0.328211	0.345531	0.305675	1.46271	1.70974	1.36935	1.51879	1.91823	1.08056	2.21857	1.95675	1.90929	1.7521	2.11239	1.62522	0.423784	0.39818	0.396373	0.380089	0.37887	0.454161	0.889157	0.957598	0.844877
WMW0007	[1S-(1.alpha.,7.alpha.,8a.beta.)]-1,2,3,5,6,7,8,8a-octahydro-1,4-dimethyl-7-(1-methylethenyl)-Azulene	Terpenoids	C15H24	3691-11-0	5.97145	4.83717	5.31876	4.61202	5.96257	5.80943	11.437	13.3626	10.8226	11.7863	20.5551	11.8181	1.23429	1.09381	1.07075	1.07052	1.28628	1.07612	6.0373	6.10518	5.76528	5.48091	5.55008	6.08811	10.1949	10.5077	9.90265
XMW0176	[1α,4aα,8aα]-1,2,4a,5,6,8a-hexahydro-4-7-dimethyl-1-[1-methylethyl]naphthalene	Terpenoids	C15H24	31983-22-9	2.05393	1.70667	1.70707	1.88373	1.80959	1.74055	1.8481	0.127755	1.7993	0.11597	0.151968	1.9607	3.95418	3.39695	3.23208	3.33486	4.05345	3.45279	0.613487	0.91006	0.882764	0.909603	0.90404	0.642508	2.13206	2.85405	2.76481
D339	cis-.alpha.-Bisabolene	Terpenoids	C15H24	29837-07-8	21.939	20.4688	21.9913	20.0858	19.9794	18.024	3.4987	4.06652	3.45028	3.6914	4.83724	3.69391	4.41692	3.91423	3.83169	3.83088	4.60298	3.85092	24.5614	18.755	17.7386	21.9757	22.2629	25.3364	30.5598	46.7662	44.3751
KMW0478	cis-.beta.-Farnesene	Terpenoids	C15H24	28973-97-9	0.626532	0.544725	0.613388	0.561022	0.582959	0.532274	0.850302	0.900198	0.812166	0.794347	1.08933	0.879972	0.97486	0.856522	0.842401	0.795856	0.562171	0.579576	0.271717	0.259844	0.244821	0.247985	0.248555	0.28646	0.556488	0.672855	0.597335
XMW0202	cis-2,6-Dimethyl-2,6-octadiene	Hydrocarbons	C10H18	2492-22-0	0.0131474	0.0120507	0.014541	0.0130554	0.0140127	0.013342	0.0323505	0.0341122	0.0306925	0.0358232	0.0410815	0.0306068	0.0318069	0.0288847	0.0273797	0.0274753	0.0334678	0.0219879	0.0143138	0.0128393	0.0112231	0.0111576	0.0117081	0.0133834	0.0145593	0.0137775	0.0134648
WMW0081*013	cis-2-(2-Pentenyl)furan	Heterocyclic compound	C9H12O	70424-13-4	0.0887332	0.0872453	0.0926622	0.0895634	0.084581	0.0816178	0.108277	0.105559	0.0986382	0.107826	0.13012	0.149207	0.168677	0.15355	0.140433	0.139422	0.14709	0.144288	0.0295937	0.0292512	0.0281551	0.0265519	0.0299951	0.0450815	0.0778309	0.0877501	0.0821271
XMW0461*076	cis-3-Hexenyl cis-3-hexenoate	Ester	C12H20O2	61444-38-0	0.0231637	0.0196556	0.0393733	0.0191137	0.0214523	0.0181558	0.0869138	0.101024	0.0814108	0.0901017	0.114745	0.0684433	0.131714	0.117315	0.112326	0.106093	0.124054	0.0984184	0.0802788	0.0721356	0.0697302	0.0729643	0.0742513	0.0797395	0.0653214	0.0725909	0.0641782
XMW0479	cis-3-Hexenyl salicylate	Ester	C13H16O3	65405-77-8	0.0774997	0.0508809	0.0538393	0.0465096	0.0554105	0.0546866	0.153945	0.174523	0.163519	0.144899	0.183433	0.112203	0.0928217	0.0854008	0.0842616	0.0806895	0.112363	0.0815912	0.0372248	0.0419621	0.0411058	0.0434305	0.0297425	0.0504064	0.0562118	0.0513545	0.0489939
KMW0377	cis-3-Hexenyl-.alpha.-methylbutyrate	Ester	C11H20O2	53398-85-9	0.568685	0.53471	0.508734	0.503632	0.515582	0.468852	0.507823	0.523925	0.481891	0.496828	0.63641	0.486872	0.586889	0.508101	0.479613	0.496716	0.477995	0.46869	0.523971	0.513836	0.46672	0.49033	0.465328	0.550454	0.471675	0.533434	0.473121
KMW0393	cis-4-Decenal	Aldehyde	C10H18O	21662-09-9	0.1353	0.131436	0.129661	0.124082	0.130121	0.117689	0.0766059	0.0848383	0.0075342	0.0421115	0.0965607	0.0687618	0.0630797	0.0589615	0.0418354	0.0554658	0.0811804	0.0552132	0.12071	0.117581	0.107657	0.112597	0.112288	0.127582	0.0836979	0.0956426	0.0872183
XMW0217	cis-7-Decen-1-al	Aldehyde	C10H18O	21661-97-2	0.0342747	0.0308178	0.0332471	0.0219592	0.0343289	0.0249163	0.0863824	0.109858	0.0924057	0.0843096	0.131526	0.0944994	0.0857787	0.0734916	0.0775112	0.0737848	0.0984417	0.0699679	0.0266039	0.0242893	0.0227324	0.0221006	0.0196898	0.0277346	0.055149	0.0676524	0.0631503
D399*124	cis-9-Tetradecen-1-ol	Alcohol	C14H28O	35153-15-2	0.0973187	0.0616871	0.0644318	0.045337	0.0700493	0.0707087	0.126279	0.152585	0.141169	0.128598	0.150191	0.08546	0.070741	0.0645519	0.0632213	0.0634013	0.0839771	0.0616676	0.0507855	0.0516568	0.037598	0.0406618	0.0381434	0.0725886	0.0558296	0.048103	0.0459071
XMW0386*065	cis-Calamenene	Terpenoids	C15H22	72937-55-4	0.0320505	0.0307658	0.0310485	0.0304138	0.0308595	0.0288044	0.211474	0.229352	0.206168	0.20555	0.25118	0.198952	0.564346	0.470744	0.459688	0.432114	0.483081	0.395995	0.0359855	0.0345615	0.0326349	0.0326866	0.0323064	0.0365538	0.166098	0.162997	0.234716
XMW0913	cis-Chrysanthenol	Terpenoids	C10H16O	55722-60-6	0.152391	0.148724	0.152112	0.124567	0.144424	0.118981	0.404402	0.467599	0.369378	0.383017	0.415445	0.221921	0.387139	0.331409	0.290242	0.31009	0.393765	0.300203	0.0579336	0.0576213	0.0460446	0.0489066	0.0579686	0.0739779	0.203922	0.217526	0.149225
KMW0386	cis-Dihydrocarvone	Terpenoids	C10H16O	3792-53-8	0.155797	0.162974	0.15648	0.155895	0.163067	0.153038	0.124426	0.127533	0.127517	0.135258	0.152039	0.107005	0.135979	0.125475	0.112251	0.11498	0.125022	0.104149	0.154744	0.123309	0.138267	0.137113	0.13692	0.133323	0.111235	0.112037	0.13528
XMW0720	cis-p-Mentha-2,8-dien-1-ol	Terpenoids	C10H16O	3886-78-0	1.49469	1.39142	1.46698	1.20637	1.3722	1.19865	9.39467	10.4111	9.35485	9.08852	11.6177	5.86263	11.6842	10.4873	8.1744	9.65904	10.3645	8.68213	0.620654	0.580253	0.572165	0.553553	0.56563	0.639641	4.16267	3.34128	3.98111
D163	dl-Camphoroquinone	Terpenoids	C10H14O2	10373-78-1	0.473604	0.378372	0.49957	0.45578	0.457399	0.4146	1.79402	2.03765	1.69971	1.8294	2.3371	1.81773	2.21859	1.96218	1.9011	1.87358	2.17204	1.87633	0.127364	0.119273	0.115888	0.116945	0.123191	0.130888	0.768176	0.885154	0.800212
KMW0389*092	endo-Borneol	Terpenoids	C10H18O	507-70-0	0.39236	0.401185	0.426739	0.350114	0.402393	0.391038	2.58785	2.80701	2.55155	2.50742	2.69396	2.14894	2.6002	1.94494	1.9274	2.00126	2.78221	1.81006	0.947406	0.877989	0.874195	0.949174	0.679027	0.904692	1.27898	1.46369	1.30544
XMW0382*054	isoledene	Terpenoids	C15H24	95910-36-4	0.0737093	0.0647795	0.0691012	0.0539189	0.0561828	0.0478927	0.117322	0.120431	0.107041	0.111917	0.128766	0.116544	0.143123	0.12636	0.121856	0.113596	0.129321	0.105643	0.0327254	0.0288121	0.0316105	0.0307633	0.0206096	0.0315449	0.0886381	0.0861575	0.0652031
D347	n-Capric acid isobutyl ester	Ester	C14H28O2	30673-38-2	0.139543	0.133949	0.13518	0.132417	0.134357	0.12541	1.00095	0.939515	0.974605	0.885869	1.28324	0.997879	1.10336	0.917265	0.909844	1.0125	1.19277	0.772419	0.156675	0.150475	0.142087	0.142312	0.140657	0.159149	0.686247	0.939375	0.875391
XMW1105	n-Heptyl hexanoate	Ester	C13H26O2	6976-72-3	1.0644	0.92475	0.971559	0.921558	0.941347	0.878198	0.341508	0.353385	0.338826	0.32968	0.409291	0.287794	0.228803	0.199277	0.196005	0.18465	0.217235	0.184779	0.701048	0.669451	0.628613	0.647791	0.656268	0.740184	0.394931	0.407051	0.315589
XMW1400	n-Pentyl methylphosphonofluoridate	Others	C6H14FO2P	13454-59-6	0.00582036	0.00573629	0.00580134	0.00443189	0.00438156	0.00553572	0.0591855	0.0260588	0.0545849	0.0600731	0.073176	0.0216288	0.0534307	0.0448016	0.0441136	0.0449186	0.0532207	0.0441285	0.00102187	0.000981438	0.000926729	0.000928195	0.000917399	0.00103801	0.0237615	0.0321841	0.0282079
XMW0127*016	o-Cymene	Terpenoids	C10H14	527-84-4	51.9339	50.5106	51.8228	46.311	49.3038	46.5915	307.467	321.51	306.084	303.359	359.161	175.854	243.652	222.839	202.283	205.133	257.96	190.368	41.165	39.586	41.9458	41.329	42.5585	41.4567	108.338	100.608	114.721
KMW0112	o-Xylene	Aromatics	C8H10	95-47-6	0.00578883	0.0068766	0.00725781	0.00669718	0.00622354	0.00632882	0.00873565	0.00923121	0.00862221	0.0096134	0.0095436	0.01116	0.0100766	0.00992887	0.00934547	0.0101304	0.0105004	0.0100771	0.0061817	0.00445488	0.00501009	0.00535985	0.00541115	0.00610522	0.00986932	0.0115014	0.0118126
KMW0508	p-Cymen-7-ol	Alcohol	C10H14O	536-60-7	1.34624	1.33815	1.34415	1.34542	1.30144	0.129075	3.58651	4.01542	6.25035	3.51462	4.76598	3.55317	4.64499	3.93109	3.8845	3.7479	4.66352	3.88034	0.165127	0.157954	0.159774	0.152867	0.146754	0.161153	3.21826	3.7381	3.48857
KMW0234*094	p-Cymene	Aromatics	C10H14	99-87-6	17.3391	16.8791	23.2238	15.7302	17.2546	15.6988	113.704	117.307	113.105	110.635	120.162	62.689	75.6346	78.6733	61.6495	63.6317	78.9668	58.662	14.3916	13.8703	14.6625	12.6002	12.8381	14.5904	38.1265	36.6598	39.5865
XMW0063	p-Isopropoxyaniline	Amine	C9H13NO	7664-66-6	6.42371	5.65998	6.77337	6.16038	6.16917	5.62162	24.017	27.1726	22.8298	24.7667	31.9679	24.6139	30.1695	26.5685	25.6401	25.2608	29.7075	25.5673	1.8799	1.66061	1.58093	1.6695	1.77542	1.87737	13.7044	16.2842	15.1326
XMW0631*093	p-Menth-2-en-7-ol, cis-	Phenol	C10H18O	19898-86-3	0.0770269	0.079342	0.0849171	0.0618121	0.079879	0.0613892	0.060438	0.0889382	0.065699	0.0594975	0.167357	0.126154	0.0750746	0.0675451	0.0656411	0.0649853	0.0774481	0.0619243	0.0576067	0.0500416	0.0498084	0.0503619	0.0468637	0.0595035	0.0657915	0.0886762	0.061507
NMW0060	p-Menth-8-en-1-ol, stereoisomer	Terpenoids	C10H18O	7299-40-3	0.0452229	0.0463646	0.0546497	0.0435783	0.0449918	0.0411675	0.212005	0.232216	0.207057	0.20565	0.27629	0.211673	0.209102	0.117491	0.182692	0.121415	0.220686	0.108891	0.0831782	0.0682362	0.068059	0.0577106	0.0528545	0.0814536	0.103209	0.11923	0.119739
KMW0458	p-Menth-8-en-3-ol, acetate	Ester	C12H20O2	89-49-6	0.0655389	0.0822693	0.0892794	0.0812913	0.0786747	0.068713	0.0889136	0.104358	0.069807	0.101792	0.0905255	0.0975127	0.164026	0.148574	0.11102	0.112577	0.121967	0.134728	0.0427322	0.0361724	0.0390194	0.0401292	0.0459283	0.0412627	0.0870541	0.086043	0.0844573
XMW0719	p-Mentha-1,5,8-triene	Terpenoids	C10H14	21195-59-5	1.20407	1.10954	1.21453	1.02262	1.17651	1.06703	8.75071	9.36243	8.59796	8.34102	8.94628	4.71704	9.21341	8.48721	7.48467	7.68376	10.2062	6.97994	0.645045	0.600296	0.592396	0.511207	0.425516	0.670932	3.85664	3.40862	3.62657
XMW0530	p-Mentha-1,5-dien-8-ol	Terpenoids	C10H16O	1686-20-0	0.0470606	0.0287009	0.0473467	0.0261446	0.0446742	0.0268888	0.204412	0.207745	0.229062	0.191736	0.26213	0.168938	0.228232	0.198294	0.187905	0.193953	0.233537	0.185547	0.0327494	0.0497025	0.0451827	0.0472989	0.0439244	0.0533286	0.125589	0.12424	0.109851
D193*131	p-Mentha-1,8-dien-7-ol	Terpenoids	C10H16O	536-59-4	1.65318	1.62182	1.70481	1.56725	1.6047	1.43677	5.28597	6.02449	5.11202	5.28901	6.77753	5.19094	5.30719	4.68531	4.51318	4.46884	5.18626	4.37921	1.30836	1.25108	1.19961	1.18479	1.19793	1.31982	2.81216	3.32515	3.10998
NMW0123	p-Menthane-3,8-diol, cis-1,3,trans-1,4-	Terpenoids	C10H20O2	3564-98-5	5.27321	5.15325	5.40876	4.97576	5.10403	4.55956	17.3903	19.9077	16.8324	17.3651	22.184	17.0564	17.3233	15.2869	14.7702	14.592	17.0023	14.3528	4.23811	4.04346	3.86498	4.11488	4.18794	4.55428	9.05718	10.8902	9.99386
D170	p-Tolyl isobutyrate	Ester	C11H14O2	103-93-5	0.00810567	0.00787123	0.0084757	0.00822433	0.00782147	0.00713855	0.0280334	0.0324508	0.0267937	0.0284619	0.0354366	0.0277888	0.0278627	0.0255108	0.0240007	0.02436	0.0275206	0.0239538	0.00628145	0.0061175	0.0057367	0.00466294	0.00652472	0.00662039	0.0150405	0.0176422	0.016281
XMW0307*006	p-Xylene	Aromatics	C8H10	106-42-3	0.0156102	0.0189603	0.0213978	0.0194831	0.0189737	0.0184515	0.021016	0.0247864	0.0208575	0.0235084	0.0263953	0.0269576	0.0259644	0.0252046	0.0243105	0.0250767	0.0266564	0.0265457	0.0171395	0.0138744	0.0176355	0.0155653	0.018451	0.0170641	0.027637	0.029351	0.0328937
XMW1092	spiro[3-oxatricyclo[3.3.1.02,4]nonane-8,1'-cyclopropane]-6-one	Ketone	C10H12O2	109637-57-2	0.399391	0.344117	0.354095	0.283615	0.355425	0.436318	1.99583	2.38189	2.07518	2.05368	2.68241	1.25685	1.84828	2.14753	1.51221	1.95846	2.68645	1.40245	0.220136	0.274762	0.249478	0.248905	0.252492	0.238836	0.782492	0.78829	0.760917
KMW0355	trans,cis-2,6-Nonadien-1-ol	Alcohol	C9H16O	28069-72-9	0.159626	0.148982	0.153834	0.129792	0.148759	0.124599	0.488489	0.535467	0.46511	0.463234	0.526865	0.315945	0.456506	0.396667	0.36299	0.3822	0.470026	0.367113	0.0798762	0.0803157	0.0692645	0.0734502	0.0772018	0.0895416	0.281098	0.289007	0.231615
KMW0555	trans-.alpha.-Bergamotene	Terpenoids	C15H24	13474-59-4	6.56527	5.76491	6.29843	5.94532	5.94297	5.5598	15.8649	17.4065	15.2218	15.8654	20.3949	14.2284	10.3274	9.20903	9.01599	8.63144	10.8772	12.2647	4.00491	3.73684	3.54193	3.60345	3.59996	4.26852	8.78061	10.2748	9.2515
WMW0040*154	trans-.beta.-Ocimene	Terpenoids	C10H16	3779-61-1	105.509	103.412	105.403	101.494	102.987	95.5388	13.6956	15.9183	13.5061	14.4499	18.9353	14.4598	17.29	15.3222	14.9991	14.9959	18.0183	15.0744	81.7534	73.4163	74.6553	75.3225	76.7966	77.9529	212.632	238.343	233.145
D368	trans-11-Tetradecenyl acetate	Ester	C16H30O2	33189-72-9	0.00500387	0.00355916	0.00324648	0.00266772	0.00323181	0.00275954	0.00560702	0.0104928	0.006338	0.00561772	0.0130669	0.00525825	0.00302946	0.00286747	0.00313033	0.00274157	0.00438232	0.00281284	0.00234947	0.00173738	0.00141065	0.0013312	0.00128323	0.00338846	0.00495385	0.00555996	0.00631946
KMW0674	trans-2-Dodecen-1-ol	Alcohol	C12H24O	69064-37-5	0.380615	0.377099	0.436441	0.354259	0.368762	0.335539	0.152454	0.175382	0.145415	0.156264	0.00880731	0.10372	0.177407	0.152444	0.143109	0.154998	0.191977	0.168384	0.0373179	0.0347075	0.0322443	0.198697	0.00638394	0.0385581	0.1138	0.136362	0.127886
WMW0046	trans-2-Undecen-1-ol	Alcohol	C11H22O	75039-84-8	0.00674322	0.0059289	0.00657471	0.00632914	0.00629885	0.0058969	0.0129015	0.0151661	0.0126174	0.0124034	0.0167226	0.0136038	0.0142229	0.011675	0.0119531	0.0110651	0.0139357	0.0135791	0.0045675	0.00560934	0.00434348	0.00680945	0.00649474	0.00606499	0.0083073	0.010193	0.00675931
NMW0246*125	trans-4-MethoxycinnamAldehyde	Aldehyde	C10H10O2	24680-50-0	0.0168057	0.0142906	0.0152263	0.0134059	0.013564	0.0141378	0.0281933	0.029158	0.0291928	0.0277477	0.0318925	0.0227306	0.0316155	0.0291141	0.0265619	0.0275768	0.0324776	0.0268277	0.0113808	0.0119823	0.011719	0.0115494	0.0105969	0.0102444	0.0159769	0.0150178	0.0150796
WMW0021*065	trans-Calamenene	Terpenoids	C15H22	73209-42-4	0.0320505	0.0307658	0.0310485	0.0304138	0.0308595	0.0288044	0.211474	0.229352	0.206168	0.20555	0.25118	0.198952	0.564346	0.470744	0.459688	0.432114	0.483081	0.395995	0.0359855	0.0345615	0.0326349	0.0326866	0.0323064	0.0365538	0.166098	0.162997	0.234716
KMW0685	trans-Farnesol	Terpenoids	C15H26O	106-28-5	0.00170367	0.00163538	0.00165041	0.00161667	0.00164036	0.00153112	0.00171357	0.00199168	0.00168986	0.00180795	0.00236915	0.00180918	0.0267553	0.0245204	0.0222635	0.0225721	0.0273528	0.0216694	0.00191284	0.00183714	0.00173473	0.00173748	0.00171727	0.00194304	0.00776009	0.00867851	0.00903852
KMW0480*050	trans-Geranic acid methyl ester	Terpenoids	C11H18O2	1189-09-9	0.900006	0.847086	0.93689	0.870038	0.860925	0.803606	4.34502	4.90962	4.16542	4.35844	5.5381	4.32971	5.32637	4.65983	4.57217	4.52954	3.57109	4.50343	0.387813	0.356404	0.341322	0.296056	0.372872	0.340998	1.55467	2.53895	2.35979
KMW0720	trans-Isoeugenol	Phenol	C10H12O2	5932-68-3	0.00598757	0.00494089	0.00539383	0.00541869	0.005519	0.00478754	0.012979	0.0147323	0.014865	0.000608585	0.0161306	0.00864095	0.0102079	0.000645323	0.000631715	0.0080061	0.009783	0.00795422	0.00333298	0.00348801	0.00303323	0.00292432	0.00354958	0.00383456	0.00481864	0.00988811	0.0088759
NMW0204	trans-O-Dithiane-4,5-diol	Heterocyclic compound	C4H8O2S2	14193-38-5	0.00369477	0.00341269	0.00313007	0.00317957	0.00320908	0.00310228	0.00983662	0.0110294	0.00955798	0.00949316	0.0124232	0.007448	0.0110097	0.00963596	0.00998406	0.00935076	0.00922088	0.00752182	0.00176188	0.00150767	0.00179147	0.00148514	0.00141489	0.00260908	0.004534	0.00539327	0.00639031
KMW0299	trans-Rose oxide	Terpenoids	C10H18O	876-18-6	0.742365	0.764684	0.819326	0.610255	0.791175	0.639764	1.56562	2.05187	1.50906	1.58567	2.43002	1.72863	1.08848	0.96647	0.969642	0.964886	1.04364	0.911481	0.582221	0.51118	0.47989	0.499139	0.460362	0.582506	0.734151	0.974737	0.845803
XMW1033	trans-Valerenyl acetate	Ester	C17H26O2	101527-74-6	0.015384	0.0104149	0.0110343	0.00775599	0.0113154	0.00842999	0.0138894	0.0255047	0.0153072	0.0143075	0.0365342	0.0138063	0.0115835	0.0101032	0.0084441	0.0101559	0.0179558	0.00933658	0.00437457	0.00654384	0.00420787	0.00298234	0.00391574	0.00800739	0.00845155	0.0110891	0.00793273
