# Supplementary material for: Integrated volatile metabolome and transcriptome analyses provide insights into the warm aroma formation elicited by methyl jasmonate in carrot root
Source: Front Plant Sci. 2024 Sep 18;15:1467957. doi: 10.3389/fpls.2024.1467957 (PMC11457697; doi:10.3389/fpls.2024.1467957)
Supplement: Supplementary file 2 [file Table2.xlsx]

## Sheet: Sheet1
Table S2 Differentially accumulated compounds in response to MeJA treatment
Index	Compounds	Class I	Formula	CAS	CK-1	CK-2	CK-3	CK-4	CK-5	CK-6	MeJA100-1	MeJA100-2	MeJA100-3	MeJA100-4	MeJA100-5	MeJA100-6	MeJA200-1	MeJA200-2	MeJA200-3	MeJA200-4	MeJA200-5	MeJA200-6	DIECA-1	DIECA-2	DIECA-3	DIECA-4	DIECA-5	DIECA-6
WMW0159	(+)-(1R,4R,5R)-2-(10)-PINEN-4-OL	Terpenoids	C10H16O	13040-03-4	60562.7	63502.4	67317	55442.7	63916.7	56466.4	151588	144998	151768	145570	119373	121113	161775	167166	143124	149479	150676	144800	26051.9	26422.7	27316.8	26269.8	28801.8	26267.3
KMW0328	(+)-(E)-Limonene oxide	Terpenoids	C10H16O	6909-30-4	231187	245659	260658	213204	246940	215175	589205	567715	592843	566820	590459	481862	567980	588060	503384	530432	703165	520137	107827	102671	107070	105807	108846	115261
WMW0023*011	(+)-alpha-Pinene	Terpenoids	C10H16	7785-70-8	1.39403e+07	1.44101e+07	1.61288e+07	1.50026e+07	1.51779e+07	1.53307e+07	4.49789e+07	3.83966e+07	4.26507e+07	4.4531e+07	3.72922e+07	4.06301e+07	4.52272e+07	4.77801e+07	4.60348e+07	4.44763e+07	4.11933e+07	4.51939e+07	4.44827e+06	3.52894e+06	3.90463e+06	3.98878e+06	4.25197e+06	4.05761e+06
NMW0092	(+)-neodihydrocarveol	Terpenoids	C10H18O	18675-33-7	2700.82	2700.82	2700.82	2700.82	2700.82	2700.82	23265.3	22536.6	23365.8	23389.5	21963.7	20983.6	24128.1	24889.2	24934.4	25434.7	24717.8	23558.8	2700.82	2700.82	2700.82	2700.82	2700.82	2700.82
KMW0552	(-)-.beta.-Bourbonene	Terpenoids	C15H24	5208-59-3	352507	322129	369536	341663	356453	346113	1.04191e+06	1.04864e+06	985941	1.04158e+06	1.00306e+06	783496	1.25898e+06	1.23693e+06	1.2249e+06	1.13167e+06	1.12321e+06	1.05676e+06	269476	252919	253631	266881	285096	295284
D374	(-)-trans-Pinane	Terpenoids	C10H18	33626-25-4	27100.4	28821.2	30345.2	28854.5	29506.9	28956.6	100496	84957.4	85964.3	87752.7	82917	84431.1	79443.1	95258.3	89200.7	90561.4	76754.5	77558.7	18742.8	16158.2	17052	18236.2	17960.7	15565.3
KMW0616*152	(1.alpha.,4a.beta.,8a.alpha.)-1,2,3,4,4a,5,6,8a-octahydro-7-methyl-4-methylene-1-(1-methylethyl)-Naphthalene	Terpenoids	C15H24	39029-41-9	9.02236e+06	8.81264e+06	8.53841e+06	8.79061e+06	8.87761e+06	8.86868e+06	2.45369e+07	3.42199e+07	2.37214e+07	3.24021e+07	2.39388e+07	2.30538e+07	3.13974e+07	3.01216e+07	2.95796e+07	3.05908e+07	3.05863e+07	2.42384e+07	7.09339e+06	6.97048e+06	6.93955e+06	7.02372e+06	7.09622e+06	7.26252e+06
D178	(1R,3aR,5aR,9aS)-1,4,4,7-Tetramethyl-1,2,3,3a,4,5a,8,9-octahydrocyclopenta[c]benzofuran	Terpenoids	C15H24O	104188-25-2	3.70678e+06	4.46061e+06	5.23534e+06	4.25829e+06	3.4071e+06	4.00715e+06	5.45451e+06	5.57725e+06	5.31741e+06	5.30741e+06	5.09904e+06	5.61333e+06	5.34123e+06	4.27695e+06	5.40269e+06	5.47615e+06	5.54445e+06	5.84503e+06	681420	681420	681420	681420	681420	681420
XMW0937	(1R,5S,6R)-2,7,7-Trimethylbicyclo[3.1.1]hept-2-en-6-yl acetate	Ester	C12H18O2	67999-48-8	886575	862616	988595	865870	862235	879537	3.41916e+06	3.28017e+06	3.32579e+06	3.14119e+06	2.98601e+06	3.06127e+06	4.12267e+06	3.98167e+06	4.00716e+06	4.02218e+06	3.68846e+06	3.88433e+06	247778	236157	245869	198773	261271	197231
NMW0783*011	(1S)-2,6,6-Trimethylbicyclo[3.1.1]hept-2-ene	Terpenoids	C10H16	7785-26-4	1.39403e+07	1.44101e+07	1.61288e+07	1.50026e+07	1.51779e+07	1.53307e+07	4.49789e+07	3.83966e+07	4.26507e+07	4.4531e+07	3.72922e+07	4.06301e+07	4.52272e+07	4.77801e+07	4.60348e+07	4.44763e+07	4.11933e+07	4.51939e+07	4.44827e+06	3.52894e+06	3.90463e+06	3.98878e+06	4.25197e+06	4.05761e+06
XMW0819*058	(1S,4S,4aR)-1-Isopropyl-4-methyl-7-methylene-1,2,3,4,4a,5,6,7-octahydronaphthalene	Terpenoids	C15H24	157477-72-0	2.05331e+06	1.88386e+06	2.104e+06	1.9946e+06	2.00005e+06	1.96774e+06	3.6924e+06	4.66128e+06	3.43679e+06	4.55958e+06	3.55747e+06	3.69295e+06	4.4495e+06	4.50049e+06	4.51829e+06	4.25287e+06	4.19255e+06	4.208e+06	1.0027e+06	975342	990790	975380	1.07563e+06	1.01328e+06
XMW0197*058	(1S,4S,4aS)-1-Isopropyl-4,7-dimethyl-1,2,3,4,4a,5-hexahydronaphthalene	Terpenoids	C15H24	267665-20-3	2.05331e+06	1.88386e+06	2.104e+06	1.9946e+06	2.00005e+06	1.96774e+06	3.6924e+06	4.66128e+06	3.43679e+06	4.55958e+06	3.55747e+06	3.69295e+06	4.4495e+06	4.50049e+06	4.51829e+06	4.25287e+06	4.19255e+06	4.208e+06	1.0027e+06	975342	990790	975380	1.07563e+06	1.01328e+06
XMW0685	(2S,6R,7S,8E)-(+)-2,7-Epoxy-4,8-megastigmadiene	Heterocyclic compound	C13H20O	108342-25-2	52404.9	51278.6	57495	52639.8	51480.9	50924.8	199154	198020	197235	189909	184585	189087	192784	191505	189030	186101	184755	188347	16289.9	15974	16490.7	15864.1	17947.2	15962.1
XMW0182	(3S,3aS,6R,8aS)-3,8,8-Trimethyl-7-methyleneoctahydro-1H-3a,6-methanoazulene	Terpenoids	C15H24	31145-21-8	3.65951e+06	2.55339e+06	3.76122e+06	2.61873e+06	3.47987e+06	2.66721e+06	5.99664e+06	5.52282e+06	5.59975e+06	5.48836e+06	5.56791e+06	6.03164e+06	7.89221e+06	7.92982e+06	7.57159e+06	7.77672e+06	7.70197e+06	7.62777e+06	2.05696e+06	1.91859e+06	1.92311e+06	2.02694e+06	2.15251e+06	2.08659e+06
KMW0566*060	(4aR-trans)-decahydro-4a-methyl-1-methylene-7-(1-methylethylidene)-Naphthalene	Terpenoids	C15H24	515-17-3	1.05588e+06	935197	1.09553e+06	986592	997334	982641	1.24349e+06	1.55085e+06	1.18311e+06	1.55176e+06	1.13763e+06	965542	1.79357e+06	2.23506e+06	1.70067e+06	1.68671e+06	1.72891e+06	1.71684e+06	363051	331745	337922	354856	361712	368693
XMW0916	(5-bromopentyl)-Benzene	Aromatics	C11H15Br	14469-83-1	1.76662e+06	2.05638e+06	1.84653e+06	2.09707e+06	1.6874e+06	1.69831e+06	4.58975e+06	4.56149e+06	4.29194e+06	4.54564e+06	4.29248e+06	3.68387e+06	6.27209e+06	6.33443e+06	6.18778e+06	5.75339e+06	5.73251e+06	5.55653e+06	1.60053e+06	1.61825e+06	1.50237e+06	1.57321e+06	1.60854e+06	1.7165e+06
XMW1435	(6,6-dimethyl-2-bicyclo[3.1.1]hept-2-enyl)methyl 2-methylpropanoate	Ester	C14H22O2	29021-37-2	4.31605e+06	3.94232e+06	4.46196e+06	1.04373e+06	4.15157e+06	4.00586e+06	9.30235e+06	9.36778e+06	8.8669e+06	9.1631e+06	8.92525e+06	7.65996e+06	8.87047e+06	8.90778e+06	8.73895e+06	8.17531e+06	8.15711e+06	7.77659e+06	522789	498833	529765	532671	525607	507195
KMW0573*147	(E)-.beta.-Famesene	Terpenoids	C15H24	18794-84-8	419913	362044	435498	374410	386232	381640	789940	790953	735050	780960	764423	855216	1.01714e+06	853322	1.02382e+06	784276	757401	722431	190398	178344	280706	191152	197018	192064
GMW0087	(E)-2-Decenal	Aldehyde	C10H18O	3913-81-3	626190	844374	909775	851061	816925	758111	736485	777462	550837	816528	896223	795626	861015	937561	791556	818157	843994	858864	356081	305722	343186	347902	410535	329756
KMW0243	(E)-2-Octenal	Aldehyde	C8H14O	2548-87-0	50135.8	52394.2	57052.3	54684.1	53094.5	53870.1	236471	200843	220912	229298	185275	194617	250827	249011	233558	235871	208716	233413	47272.9	44700.8	48272.1	49674.6	52921.1	44637.5
KMW0467*077	(E)-CinnamAldehyde	Aldehyde	C9H8O	14371-10-9	1355.14	5500.38	2105.81	4732.72	1804.75	4896.76	5887.37	5914.99	6019.13	5835.88	8364.86	5449.02	8002.7	7753.25	9974.72	7755.61	7194.97	7456.92	271.029	271.029	271.029	271.029	271.029	271.029
XMW1409	(R)-(+)-1-(p-Tolyl)ethylAmine	Amine	C9H13N	4187-38-6	115453	104242	105862	96449.3	109763	109951	330617	317514	351540	323081	313378	213827	344651	356388	323907	329752	363059	309427	61456.7	56710.5	54959.6	55475.7	57241	63963.9
D370*114	(Z)-2,2-Dimethyl-3-(3-methylpenta-2,4-dien-1-yl)oxirane	Terpenoids	C10H16O	33281-83-3	142226	150027	136924	132442	156869	138131	17942.7	1.08274e+06	17942.7	875873	980810	819490	1.18152e+06	1.2076e+06	1.07969e+06	1.12475e+06	1.14263e+06	1.03949e+06	89713.4	92711.4	106428	99489.5	97624.3	89804.7
D376	(Z)-2,6-Dimethylocta-2,5,7-trien-4-one	Ketone	C10H14O	33746-71-3	6547.91	6824	7083.43	6093.88	6587.73	6054.31	31668	31165.5	31839	31079.7	30776.8	27971.8	34136.6	35213.4	35827.3	34847.8	34216.8	33325.2	3766.41	3556	3554.91	3967.36	4116.92	3948.7
KMW0512	.alpha.-Cubebene	Terpenoids	C15H24	17699-14-8	23327.5	23692.7	25356.1	25062.3	23532.7	22840.9	31659.8	27300.3	27826.1	30329.8	28396.8	34174.8	41557.5	42885.4	41569.8	39261.1	36869.4	35958.4	6346.46	5438.97	5658.5	6763.75	6397.92	5591.25
KMW0148*011	.alpha.-Pinene	Terpenoids	C10H16	80-56-8	1.39403e+07	1.44101e+07	1.61288e+07	1.50026e+07	1.51779e+07	1.53307e+07	4.49789e+07	3.83966e+07	4.26507e+07	4.4531e+07	3.72922e+07	4.06301e+07	4.52272e+07	4.77801e+07	4.60348e+07	4.44763e+07	4.11933e+07	4.51939e+07	4.44827e+06	3.52894e+06	3.90463e+06	3.98878e+06	4.25197e+06	4.05761e+06
NMW0266	.beta.-Asarone	Aromatics	C12H16O3	5273-86-9	15587.2	21969.5	20505	21255.7	18000.5	20383.9	288252	245828	268612	245279	256640	363050	285869	257617	305962	286178	231946	297328	7229.16	5459.54	4574.69	6093.68	5263.31	5383.69
WMW0175	.delta.-Terpineol, acetate	Terpenoids	C12H20O2	93836-50-1	108634	108252	118216	106267	108911	97033.2	346063	339067	328151	376253	360960	369326	363444	357395	368158	363886	329751	348025	31536.1	30483.6	29140.2	29432.1	33077.1	33854.9
WMW0082	1,10-Undecadiene	Hydrocarbons	C11H20	13688-67-0	938706	926508	942456	881439	927003	943881	4.85602e+06	8.79734e+06	8.1433e+06	4.78497e+06	3.52512e+06	6.60229e+06	1.09823e+07	1.09426e+07	9.33438e+06	9.41195e+06	6.79234e+06	9.3017e+06	783922	769250	773177	784451	813422	791499
KMW0581	1,2,3-trimethoxy-5-(2-propenyl)-Benzene	Aromatics	C12H16O3	487-11-6	213716	206711	225280	195676	204621	194122	1.16046e+06	1.27246e+06	1.13687e+06	1.17683e+06	1.09246e+06	1.19127e+06	1.49702e+06	1.4834e+06	1.45435e+06	1.45612e+06	1.40227e+06	1.20718e+06	81685.9	76809.1	73335	79467.2	74597.2	79963.8
XMW0974	1,2,4-Methenoazulene, decahydro-1,5,5,8a-tetramethyl-, [1S-(1.alpha.,2.alpha.,3a.beta.,4.alpha.,8a.beta.,9R*)]-	Terpenoids	C15H24	1137-12-8	185036	167655	190255	164754	173883	167557	556164	482442	528832	542166	518100	404986	655696	657761	639629	597348	595167	559407	164940	154701	156309	162027	166790	163952
XMW0107	1,2-Benzenedimethanol	Alcohol	C8H10O2	612-14-6	157675	144198	164232	142189	149062	146616	444318	439588	422754	433120	416662	327997	530399	532540	519329	490879	490541	458627	105476	99469.2	97372.5	105864	106906	107273
NMW0109	1,2-Benzenediol, 3-methyl-	Alcohol	C7H8O2	488-17-5	18647.6	26549.4	29560.6	25943.1	26506.5	25425.7	54026.1	49229.3	51813.3	52343.5	49267.7	50220.9	64849.7	63541.7	65515.2	64058.9	59771.7	64799.2	7556.13	7003.32	8500.76	7761.93	8602.26	7129.8
NMW0070	1,2-Propanedione, 1-phenyl-	Ketone	C9H8O2	579-07-7	51525	45472.5	47121.3	35199.8	47310.5	36424.3	216008	245729	219722	212814	214518	131708	215468	221122	210622	206194	240829	192134	24112	19656.2	17866.9	18686.8	19189.4	26511.7
NMW0130	1,3-Benzodioxol-5-ol	Heterocyclic compound	C7H6O3	533-31-3	251506	254717	274280	247081	252731	228560	855342	836708	1.20791e+06	921124	881039	906988	916157	905702	1.18323e+06	920981	819352	876723	71745.5	70436.4	71671.5	69657.2	79425	71695.4
D393	1,3-Cyclohexadiene-1-carboxylic acid, 2,6,6-trimethyl-, ethyl ester	Ester	C12H18O2	35044-59-8	1.34173e+06	1.21857e+06	1.34497e+06	1.26561e+06	1.26517e+06	1.25481e+06	1.70783e+06	1.57461e+06	1.70902e+06	139989	1.61613e+06	1.84837e+06	1.68761e+06	1.69393e+06	1.7012e+06	1.61246e+06	1.68319e+06	1.61503e+06	726362	699945	700877	717523	731437	757794
XMW0153	1,3-Cyclopentadiene, 1,2,3,4,5-pentamethyl-	Hydrocarbons	C10H16	4045-44-7	4.88338e+06	5.0926e+06	5.40324e+06	5.24136e+06	5.15008e+06	5.22013e+06	1.81889e+07	1.75032e+07	1.7763e+07	1.7626e+07	1.69059e+07	1.71838e+07	1.82213e+07	1.87082e+07	1.83494e+07	1.57497e+07	1.55875e+07	1.76237e+07	2.7117e+06	3.29459e+06	3.56408e+06	3.52868e+06	3.75062e+06	3.14794e+06
XMW0021	1,3-Dioxolan-2-one	Ketone	C3H4O3	96-49-1	2869.71	3311.3	3337.77	3595.11	3135.62	3409.99	8618.19	7452.09	7856.07	8153.54	7132.05	7883.02	7708.73	7999.51	8003.31	7560.62	6964.96	7794.32	1010	1203.47	1129.69	1172.35	1356.94	1162.93
XMW1291	1,3-Dioxolane, 4-methyl-2-(2-methylpropyl)-	Heterocyclic compound	C8H16O2	18433-93-7	5839.35	6056.6	6638.43	5995.65	6523.09	6424.03	18141.8	16751.9	17350.2	18872.1	15722.1	17459.5	18914	19886.2	18973.9	18160.5	16811	18462.4	1758.13	1630.22	1481.24	1639.65	1700.01	1380.83
WMW0126	1,3-Hexadiene, 3-ethyl-2-methyl-	Hydrocarbons	C9H16	61142-36-7	4.27473e+06	4.40152e+06	4.8156e+06	4.41296e+06	4.42365e+06	4.38495e+06	2.13065e+07	2.03425e+07	2.14937e+07	2.08355e+07	1.92784e+07	1.95948e+07	2.42667e+07	2.40924e+07	2.40266e+07	2.34651e+07	2.2825e+07	2.30899e+07	1.90709e+06	1.83986e+06	2.01208e+06	2.01306e+06	2.15321e+06	1.78194e+06
XMW0652	1,4-Pentanediol	Alcohol	C5H12O2	626-95-9	3801.63	4191.04	4875.73	4439.98	4478.65	4278.28	13801.1	11614	12663.1	13489.5	11298.4	12533.5	13726.5	13888.2	13303.1	13487	12362.6	13572.4	1913.05	1082.8	1187.06	1128.97	1178.76	2043.23
XMW0437	1,5-Cyclooctadiene, 1,6-dimethyl-	Hydrocarbons	C10H16	3760-13-2	2.91243e+07	2.91243e+07	2.91243e+07	2.91243e+07	2.91243e+07	2.91243e+07	1.7527e+08	1.60118e+08	3.24432e+08	3.27864e+08	1.45622e+08	1.52478e+08	3.53003e+08	3.26836e+08	2.32175e+08	2.48104e+08	2.9953e+08	2.4379e+08	2.91243e+07	2.91243e+07	2.91243e+07	2.91243e+07	2.91243e+07	2.91243e+07
NMW0200*147	1,6,10-Dodecatriene, 7,11-dimethyl-3-methylene-	Terpenoids	C15H24	77129-48-7	419913	362044	435498	374410	386232	381640	789940	790953	735050	780960	764423	855216	1.01714e+06	853322	1.02382e+06	784276	757401	722431	190398	178344	280706	191152	197018	192064
XMW0671	1,7-Diazabicyclo[2.2.0]heptane	Heterocyclic compound	C5H10N2	279-42-5	75345.2	77739.8	88901.3	82787.4	83233.5	85316.5	273273	243032	261494	272565	235059	249245	235316	248351	278663	232127	253205	233207	24927.1	23609.1	26327.6	21375.2	22931	22634.8
KMW0378*036	1-(4-methylphenyl)-Ethanone	Ketone	C9H10O	122-00-9	272919	249875	255015	230223	261848	236177	725487	714431	767878	703803	683594	443907	711592	730282	667000	671033	734306	626845	141067	139218	134549	129918	134316	145729
XMW0283	1-(Furan-2-yl)-2-methylpentan-1-one	Heterocyclic compound	C10H14O2	1248070-62-3	335331	392553	422314	387186	378308	363198	786262	750797	740258	758630	740934	720565	893292	895218	873886	870746	827721	852848	136644	125317	136714	139050	156131	132096
KMW0629	1-Dodecanol	Alcohol	C12H26O	112-53-8	587776	650336	581306	659212	699625	681857	1.24072e+06	586239	1.17487e+06	1.24781e+06	1.17477e+06	444917	1.5891e+06	1.59072e+06	1.55226e+06	1.54985e+06	1.54085e+06	1.50234e+06	181289	107619	108740	174965	177184	117193
KMW0159	1-Heptanol	Alcohol	C7H16O	111-70-6	58461.2	59824.7	70466	66954.1	65541.9	61347	228540	178371	205060	224709	171127	213434	207323	214704	209309	203836	196918	201232	45574	43639.8	47243.7	46159.1	48025.2	42164.4
KMW0142	1-Hexanethiol	Sulfur compounds	C6H14S	111-31-9	16490	17057.1	18904.7	18481.8	18100.5	18505.5	57581.5	49026.8	53346.5	57888.3	48165.2	51689.6	57915.7	60711.1	59140.5	57301.1	53757.5	58096.2	5680.53	5300.27	5443.86	5321.52	5435.42	5022.25
D457	1-Hexanol, 5-methyl-2-(1-methylethyl)-, acetate	Ester	C12H24O2	40853-55-2	279831	305465	323150	303779	369493	344289	324970	343466	244233	362570	403562	349719	412185	422618	350773	390767	381405	383398	154640	136394	149855	160189	183738	148101
XMW0465*060	1-Isopropyl-4,7-dimethyl-1,2,3,4,5,6-hexahydronaphthalene	Terpenoids	C15H24	16729-00-3	1.05588e+06	935197	1.09553e+06	986592	997334	982641	1.24349e+06	1.55085e+06	1.18311e+06	1.55176e+06	1.13763e+06	965542	1.79357e+06	2.23506e+06	1.70067e+06	1.68671e+06	1.72891e+06	1.71684e+06	363051	331745	337922	354856	361712	368693
XMW1165*059	1-Isopropyl-4,7-dimethyl-1,2,3,5,6,8a-hexahydronaphthalene	Terpenoids	C15H24	16729-01-4	972485	975414	2.65884e+06	2.37242e+06	2.44946e+06	975651	2.80032e+06	2.6258e+06	5.69678e+06	2.5209e+06	5.76847e+06	2.89786e+06	5.46935e+06	5.52072e+06	5.41664e+06	5.01852e+06	5.00011e+06	4.75017e+06	1.25867e+06	1.1961e+06	1.20308e+06	1.25027e+06	1.30663e+06	1.28566e+06
KMW0170	1-Octen-3-one	Ketone	C8H14O	4312-99-6	460378	485190	522218	413010	492588	348446	1.44863e+06	1.2967e+06	1.3107e+06	1.43793e+06	1.25569e+06	1.2839e+06	1.32731e+06	1.3631e+06	1.3358e+06	1.29638e+06	1.18035e+06	1.28754e+06	259546	242984	260586	274677	271366	233631
XMW0921	1-Pentanone, 1-(2-thienyl)-	Heterocyclic compound	C9H12OS	53119-25-8	13239	12549.9	14302.2	11759.5	13800.8	11731.8	46236.8	48536.6	51504.3	48976.9	48044.8	39286.5	48313	54741.2	49545.7	49682.8	50510.7	41473.7	6155.52	5981.54	5617.75	5119.48	6280.73	6963.55
D102	1-Pentanone, 1-phenyl-	Ketone	C11H14O	1009-14-9	869835	790900	904055	796675	826328	812192	2.59704e+06	2.55257e+06	2.46596e+06	2.53715e+06	2.42659e+06	1.92192e+06	3.06824e+06	3.05888e+06	2.9783e+06	2.80424e+06	2.78563e+06	2.63102e+06	636639	597176	601799	626482	644142	643920
KMW0726	1-Tetradecanol	Alcohol	C14H30O	112-72-1	52777.1	42120.6	46780	41616.1	44089	47040.4	85529.7	87153	95144	76074	73944.3	144675	108876	115667	114856	108047	110798	107527	21063.8	23885.9	20700.2	21702.1	19658.2	25532.9
D338	1-methyl-4-(1,2,2-trimethylcyclopentyl)cyclohexa-1,3-diene	Terpenoids	C15H24	29621-78-1	3.95904e+06	4.40674e+06	3.77767e+06	4.39646e+06	4.06124e+06	4.20719e+06	9.68934e+06	9.67677e+06	9.29701e+06	9.42158e+06	9.33552e+06	9.37234e+06	8.64015e+06	8.67003e+06	8.3142e+06	1.08726e+07	1.05669e+07	1.03969e+07	4.08534e+06	3.86404e+06	3.86504e+06	4.01357e+06	4.1185e+06	4.1964e+06
NMW0004	1-methyl-4-(1-methylethenyl)-1,2-Cyclohexanediol	Terpenoids	C10H18O2	1946-00-5	53456.8	50080.8	54708.8	49889.4	54922.9	48813.4	179347	172633	208676	185518	198141	148604	255917	295309	257961	261989	272098	227264	37396.2	40094.4	37414.1	39603.5	39463.8	42869.4
XMW0742	10,10-Dimethyl-2,6-dimethylenebicyclo[7.2.0]undecane	Terpenoids	C15H24	357414-37-0	794232	719281	800304	446070	747981	736930	1.0643e+06	975748	1.05239e+06	1.00955e+06	995475	1.1441e+06	975001	986847	985142	922115	1.05114e+06	1.01174e+06	280854	281630	282439	277665	276557	296955
KMW0210	1H-Cyclopenta[1,3]cyclopropa[1,2]benzene, octahydro-7-methyl-3-methylene-4-(1-methylethyl)-, [3aS-(3a.alpha.,3b.beta.,4.beta.,7.alpha.,7aS*)]-	Terpenoids	C15H24	13744-15-5	6.23659e+06	5.65096e+06	6.45453e+06	5.63368e+06	5.9264e+06	5.77259e+06	1.8401e+07	1.81157e+07	1.7514e+07	1.80047e+07	1.72517e+07	1.33356e+07	2.18539e+07	2.19075e+07	2.15513e+07	2.00085e+07	2.00376e+07	1.87375e+07	3.9387e+06	3.70376e+06	4.31571e+06	4.11009e+06	4.16824e+06	3.98066e+06
XMW1408	1H-Cyclopropa[a]naphthalene, 1a,2,3,3a,4,5,6,7b-octahydro-1,1,3a,7-tetramethyl-, [1aR-(1a.alpha.,3a.alpha.,7b.alpha.)]-	Terpenoids	C15H24	489-29-2	237863	238844	247648	240490	228095	244089	790406	777990	756010	768511	742215	575461	943238	935652	924448	852542	858535	801115	170671	163424	161587	170217	172518	171857
XMW0380*056	1H-Cyclopropa[a]naphthalene, 1a,2,3,5,6,7,7a,7b-octahydro-1,1,7,7a-tetramethyl-, [1aR-(1a.alpha.,7.alpha.,7a.alpha.,7b.alpha.)]-	Terpenoids	C15H24	17334-55-3	2.76964e+07	2.66845e+07	2.83173e+07	2.65396e+07	2.69503e+07	2.64674e+07	2.36445e+07	5.50193e+07	5.23544e+07	5.37667e+07	5.2558e+07	4.69835e+07	4.70193e+07	4.78981e+07	4.66002e+07	4.44563e+07	4.42387e+07	4.24453e+07	4.72889e+06	4.72889e+06	4.72889e+06	4.72889e+06	4.72889e+06	4.72889e+06
XMW1141	1H-Pyrrole-2,5-dione, 3-ethenyl-4-methyl-	Heterocyclic compound	C7H7NO2	21494-57-5	154252	156220	173665	154997	155646	100492	341195	311897	333519	324004	306615	318591	421014	413860	427133	418530	387519	421323	24889.1	24014.9	25036.5	23938	26193.4	23648.1
XMW0701	1H-Pyrrolo[2,3-b]pyridine, 2-(1-methylethyl)-	Heterocyclic compound	C10H12N2	27257-18-7	85502.2	78364.6	90149.2	78487.9	82247.2	87420.3	238028	234913	227440	233776	223238	176090	282758	281893	279686	260363	260504	241885	54054.1	60937.8	61051.5	53730.8	54038.5	63872.4
XMW1406	2'-Ethoxyacetophenone	Ketone	C10H12O2	2142-67-8	54248.2	54247.7	58804.4	53829.3	54022.2	50083.8	168542	163721	160133	167795	163630	166177	171133	167374	248746	161728	171843	191449	15227.1	15015.5	15260.4	14715.4	16473.3	15063.2
XMW0800	2(1H)-Pyridinone, 3-acetyl-4-hydroxy-6-methyl-	Heterocyclic compound	C8H9NO3	5501-39-3	3634.22	4813.38	5161.85	4679.6	4791.53	4857.48	13060.4	13150.3	12749.9	13093.7	12510	10143.9	15149.3	15409.5	15518.6	14283.3	14267.9	13767.7	6400.14	5908.1	6388.15	6264.4	6431.14	6526.39
XMW0174	2,2'-Ethylidenebis(5-methylfuran)	Heterocyclic compound	C12H14O2	3209-79-8	173425	157638	181705	157568	165367	161337	516526	509772	495308	506645	484428	374446	619117	616147	607847	561044	564543	524590	112300	105379	101515	114088	114237	110507
KMW0269*022	2,3-Dimethyl-5-ethylpyrazine	Heterocyclic compound	C8H12N2	15707-34-3	1.24229e+06	1.24229e+06	1.24229e+06	1.24229e+06	1.24229e+06	1.24229e+06	1.06514e+07	1.01702e+07	1.01355e+07	1.02393e+07	9.60262e+06	9.57635e+06	6.21147e+06	1.05845e+07	1.18732e+07	1.18375e+07	1.20429e+07	1.16588e+07	1.24229e+06	1.24229e+06	1.24229e+06	1.24229e+06	1.24229e+06	1.24229e+06
XMW0049	2,4,4-Trimethyl-3-(3-methylbutyl)cyclohex-2-enone	Ketone	C14H24O	88725-82-0	34931.7	34931.7	34931.7	34931.7	34931.7	34931.7	320157	306780	316751	276821	315903	316684	333535	327610	323718	285569	282234	299818	34931.7	34931.7	34931.7	34931.7	34931.7	34931.7
NMW0228	2,4,6-Cycloheptatrien-1-one, 2-hydroxy-4-(1-methylethyl)-	Terpenoids	C10H12O2	499-44-5	34912	23847.1	33208.4	22567.9	34459.3	21593.2	45374.8	43598.3	43209.7	42908.6	42286.3	42950.5	74673	60854.2	62160.3	41032.4	42614.3	40762.8	18340.3	19302	19636.8	18484.8	17776.5	18217.9
w02	2,4-Decadien-1-ol	Alcohol	C10H18O	14507-02-9	273387	367120	328718	310851	298823	280623	321490	328642	247704	352896	365416	338394	381837	384327	355768	366728	366477	366432	162996	139375	158447	157996	185515	149765
D373	2,4-Heptadien-1-ol, (E,E)-	Alcohol	C7H12O	33467-79-7	3.66558e+06	3.66619e+06	3.96591e+06	3.78974e+06	3.62206e+06	3.54078e+06	7.69046e+06	7.09082e+06	7.26641e+06	7.54824e+06	6.46822e+06	7.30652e+06	7.12188e+06	7.19293e+06	6.98388e+06	6.87031e+06	6.24238e+06	6.89701e+06	1.46504e+06	1.53735e+06	1.54984e+06	1.52797e+06	1.70244e+06	1.5383e+06
XMW0761	2,4-Quinolinediol	Heterocyclic compound	C9H7NO2	86-95-3	5.88347e+07	5.60641e+07	5.98674e+07	5.63525e+07	5.74395e+07	5.61651e+07	1.16215e+08	4.88847e+07	1.12152e+08	1.14808e+08	1.10937e+08	9.94272e+07	1.00349e+08	1.00583e+08	9.83374e+07	9.55566e+07	9.47225e+07	8.87498e+07	9.77693e+06	9.77693e+06	9.77693e+06	9.77693e+06	9.77693e+06	9.77693e+06
XMW0159	2,6,10-Trimethyltridecane	Hydrocarbons	C16H34	3891-99-4	407338	340623	338213	360194	369033	362603	583205	616962	560221	594345	564992	448116	651100	659133	552662	590673	581303	564590	245988	227254	241910	230794	260496	241298
XMW0780	2,6-Dimethyl-1,3,5,7-octatetraene, E,E-	Hydrocarbons	C10H14	460-01-5	1.39656e+06	1.31903e+06	1.35957e+06	1.14278e+06	1.31212e+06	1.23373e+06	5.53334e+06	4.49551e+06	6.36531e+06	5.00265e+06	4.34054e+06	2.91952e+06	4.75462e+06	4.77878e+06	5.06968e+06	4.63353e+06	5.42861e+06	4.70019e+06	556374	536425	559873	554460	562656	569753
w09	2,6-Octadiene, 2,6-dimethyl-	Hydrocarbons	C10H18	2792-39-4	7.88605e+06	8.27439e+06	8.88412e+06	8.40736e+06	8.42048e+06	8.30943e+06	2.40871e+07	2.15432e+07	2.16482e+07	2.38332e+07	2.08194e+07	2.24091e+07	2.1968e+07	2.26387e+07	2.21012e+07	2.14724e+07	2.083e+07	2.13187e+07	4.29505e+06	4.27503e+06	4.30299e+06	4.79768e+06	4.45445e+06	4.07408e+06
NMW0173	2,6-dihydroxy-Benzoic Acid	Acid	C7H6O4	303-07-1	114135	104616	118408	103102	108555	106181	315841	315525	298439	310069	297113	227604	379155	376904	369792	345609	344976	321336	99753.4	96781.6	96261.1	97829.7	97746.2	109155
D406	2,7-Octadien-4-ol, 2-methyl-6-methylene-, (S)-	Terpenoids	C10H16O	35628-00-3	160577	170479	180224	151316	170231	161337	458925	487048	464421	482859	434884	346111	612607	629005	544583	577959	567758	551223	101624	93770.1	98099.3	99528.2	97996.7	102322
XMW0907	2-(2-Acetoxy-1-propyl)furan, (S)	Heterocyclic compound	C9H12O3	60830-70-8	109008	104453	120157	105233	111867	90653.9	427373	394400	429530	409373	320159	251360	457943	474944	406472	428743	445669	414474	44368	41764	44054.2	41853.7	48564.1	47675.4
XMW0555	2-Acetylbenzofuran	Heterocyclic compound	C10H8O2	1646-26-0	215044	193339	221795	193112	205164	199016	626993	617965	597844	615366	589720	457616	748267	750247	741928	687539	693080	644523	159068	140132	152007	156700	156893	149613
D119	2-Benzylidene-1-heptanol	Alcohol	C14H20O	101-85-9	98038.8	75236.3	80889.5	70739.1	86467.1	87169	237738	252384	223795	261771	281865	478122	314486	367419	364527	328434	287459	355510	47807.1	52631.6	43541	45502.6	44672.3	62518.1
D290	2-Butanone, 4-phenyl-	Ketone	C10H12O	2550-26-7	13395.8	13313.3	13819.8	12855.6	14142.8	12535.3	48466.9	47597.5	47723.8	46963.9	47079.3	45091.8	52396.8	53617.1	56643.7	54626.2	53019	50832.2	7481.16	6704.63	6995.66	7073.26	7369.39	6931.78
KMW0526	2-Buten-1-one, 1-(2,6,6-trimethyl-1,3-cyclohexadien-1-yl)-, (E)-	Terpenoids	C13H18O	23726-93-4	1.74663e+06	1.57355e+06	1.81332e+06	1.52385e+06	1.6443e+06	1.56485e+06	5.32717e+06	4.98831e+06	5.04577e+06	5.01055e+06	4.83626e+06	3.96316e+06	6.22312e+06	6.21056e+06	6.09595e+06	5.7571e+06	5.73808e+06	5.4645e+06	1.46004e+06	1.37822e+06	1.36303e+06	1.43643e+06	1.46962e+06	1.48704e+06
D283	2-Buten-1-one, 1-(2,6,6-trimethyl-2-cyclohexen-1-yl)-, (E)-	Ketone	C13H20O	24720-09-0	58717.1	54226.6	59473.6	50445.9	53118.4	52162.9	168499	226068	161790	161455	162007	191022	323937	324370	316472	295352	295619	273035	51185.6	49425.7	48151.5	33137.6	32725.4	51606.3
NMW0782	2-Butenoic acid, 2-methyl-, ethyl ester	Ester	C7H12O2	55514-48-2	327668	341479	382882	359441	360585	367983	1.15268e+06	1.03818e+06	1.10084e+06	1.14904e+06	1.00211e+06	1.05745e+06	1.14245e+06	1.04639e+06	1.17468e+06	1.13112e+06	1.07065e+06	1.13739e+06	108546	105312	115758	91222.2	124770	100143
KMW0135	2-Cyclohexen-1-one	Ketone	C6H8O	930-68-7	9350.13	9415.26	10807.7	9771.15	10178.2	10236	36328.8	31554.8	35012.7	36816.2	30192.1	33082.3	37052.1	39918.2	36947.1	36516.7	33819	37054.2	2879.29	3028.69	3147.87	2273.33	3477.41	2327.97
XMW0248	2-Cyclohexen-1-one, 3-methyl-6-(1-methylethenyl)-, (S)-	Terpenoids	C10H14O	16750-82-6	15581.5	13364	14525.7	13036	14265	15944.4	54325.3	44840.2	59422.3	48802	44779.2	33185.7	59320.4	59901.9	53396.1	56529.9	57067.1	51267.5	5488.83	5645.37	5598.37	5981.57	5585.17	5558.36
KMW0428*107	2-Cyclohexen-1-one, 3-methyl-6-(1-methylethyl)-	Terpenoids	C10H16O	89-81-6	304732	374403	398354	377115	359674	342783	857263	292869	244280	850081	836454	289077	716444	729219	650116	663499	676022	641749	143115	127534	146470	142749	163982	135629
XMW1268	2-Furancarboxylic acid, tetrahydro-3-methyl-5-oxo-	Heterocyclic compound	C6H8O4	22073-04-7	2.49107e+06	2.23417e+06	2.53069e+06	2.14173e+06	2.37905e+06	2.27444e+06	4.57478e+06	4.17174e+06	4.32573e+06	4.35998e+06	3.20532e+06	2.26581e+06	3.94067e+06	3.97051e+06	3.804e+06	3.63372e+06	3.71021e+06	3.3891e+06	1.49093e+06	1.39891e+06	1.40359e+06	1.78606e+06	1.53508e+06	1.85875e+06
XMW0767	2-Furanmethanol, 5-ethenyltetrahydro-.alpha.,5-dimethyl-	Heterocyclic compound	C9H16O2	104188-13-8	863.638	863.638	863.638	863.638	863.638	863.638	5291.63	5297.82	5382.37	4770.26	5004.27	4741.41	5273.66	5367.88	5285.54	5220.3	4946.01	4911.41	863.638	863.638	863.638	863.638	863.638	863.638
XMW0802	2-Hydroxymethylbenzimidazole	Heterocyclic compound	C8H8N2O	22128-99-0	2.02979e+07	1.93021e+07	2.06307e+07	1.92928e+07	1.97594e+07	1.92128e+07	4.01618e+07	3.99586e+07	3.84988e+07	3.94105e+07	1.59211e+07	3.42276e+07	3.41416e+07	3.456e+07	3.36749e+07	3.24988e+07	3.23068e+07	3.05223e+07	3.18423e+06	3.18423e+06	3.18423e+06	3.18423e+06	3.18423e+06	3.18423e+06
XMW1200	2-Methylbut-2-en-1-yl acetate	Alcohol	C7H12O2	33425-30-8	4810.89	4623.14	5197.5	5304.65	4809.07	5768.12	17688	15291.1	17095.1	17964.2	15080.2	16261.2	17753.4	18873.3	18434.7	17438.6	16592.5	17984.8	1797.25	1205.86	1702.21	1647.02	1270	1523.93
KMW0187*128	2-Octanone	Ketone	C8H16O	111-13-7	10121.8	10707.3	11392.3	10927.3	10764.7	10968	38200.3	31906.9	32646.1	39205.9	35834.3	31788.8	34033.6	36948	36376.3	33310.2	29108.1	34668.2	7366	5922.74	6492.23	6334.34	6532.63	6703.06
WMW0217	2-Octenal, 2-butyl-	Alcohol	C12H22O	13019-16-4	130752	118473	134644	118928	124043	120027	393944	422820	375586	420906	406813	326087	501395	498664	490917	459076	459365	434868	196234	203051	207459	198013	202222	208830
w43	2-Oxepanone	Ester	C6H10O2	502-44-3	4990.16	4910.49	5112.62	4334.99	5146.75	4872.99	16663.1	16480.3	17257.8	15493.6	14918.3	11316.1	16487	17049.3	17385.4	13809.1	15172.9	12368.5	866.997	866.997	866.997	866.997	866.997	866.997
KMW0487*047	2-Propen-1-ol, 3-phenyl-	Alcohol	C9H10O	104-54-1	200787	161811	218609	164884	199777	156280	749539	727687	720619	721172	701914	713864	726961	724861	722131	711201	680687	708589	47074.2	45907.6	49042.2	46611.5	51249.1	47370.9
NMW0126*047	2-Propen-1-ol, 3-phenyl-, (E)-	Alcohol	C9H10O	4407-36-7	200787	161811	218609	164884	199777	156280	749539	727687	720619	721172	701914	713864	726961	724861	722131	711201	680687	708589	47074.2	45907.6	49042.2	46611.5	51249.1	47370.9
D111	2-Propenal, 2-methyl-3-phenyl-	Aldehyde	C10H10O	101-39-3	16328.3	5080.26	5228.87	4850.12	16598.2	16567.4	21704.6	21863.5	20439.7	22505.9	23870.6	25095.8	25121.1	24168	25300.6	24916	21412.3	23660	1515.45	1152.91	1540.75	1466.89	1528.3	1316.37
WMW0069*077	2-Propenal, 3-phenyl-	Aldehyde	C9H8O	104-55-2	1355.14	5500.38	2105.81	4732.72	1804.75	4896.76	5887.37	5914.99	6019.13	5835.88	8364.86	5449.02	8002.7	7753.25	9974.72	7755.61	7194.97	7456.92	271.029	271.029	271.029	271.029	271.029	271.029
NMW0188	2-Propenoic Acid, 3-phenyl-	Acid	C9H8O2	621-82-9	2.20131e+07	2.09504e+07	2.24361e+07	2.09429e+07	2.14718e+07	2.08625e+07	4.38736e+07	4.37842e+07	4.2178e+07	4.32957e+07	1.74883e+07	3.74439e+07	3.73767e+07	3.78515e+07	3.68933e+07	3.55653e+07	3.53574e+07	3.33784e+07	3.49765e+06	3.49765e+06	3.49765e+06	3.49765e+06	3.49765e+06	3.49765e+06
KMW0679	2-Propenoic acid, 3-phenyl-, methyl ester, (E)-	Ester	C10H10O2	1754-62-7	113725	101471	115940	101955	106370	104363	320931	314618	307731	312255	297454	237717	371687	369219	362960	340874	340733	321820	104219	94849.1	93280.7	92092.7	92271.6	96266.8
NMW0212	2H-Indol-2-one, 1,3-dihydro-	Heterocyclic compound	C8H7NO	59-48-3	868514	838897	827779	910682	879257	903658	2.80856e+06	2.76582e+06	2.58904e+06	2.7781e+06	2.67106e+06	2.29654e+06	4.06118e+06	4.06232e+06	3.96265e+06	3.70751e+06	3.72173e+06	3.58515e+06	1.00291e+06	1.05472e+06	1.04023e+06	1.08403e+06	1.02066e+06	1.12399e+06
D380	3(2H)-Furanone, 2-hexyl-5-methyl-	Heterocyclic compound	C11H18O2	33922-66-6	7746.14	6476.12	6386.18	7087.02	6846.2	6784.35	7510.24	7025.97	7372	6906.07	6921.87	8050.5	7387.08	7292.79	7490.97	6916.65	7339.03	6910.5	2710.7	3368.35	3029.8	3076.41	2783.97	3143.2
KMW0167	3(2H)-Thiophenone, dihydro-2-methyl-	Heterocyclic compound	C5H8OS	13679-85-1	21683.1	21968.1	23324	19745.3	21505.2	21896.3	46114	41347.5	42552.5	44351.4	36603.8	48138.3	41373.7	42725.9	46865.5	40460.1	41574.3	40341.2	7340.64	8163.74	7911.81	7994.21	9006.08	8010.26
XMW0539	3,4-Dimethoxytoluene	Aromatics	C9H12O2	494-99-5	6919.12	5071.39	6781.45	6002.48	6512.8	4765.22	105164	102496	99750.3	98057.8	99777.3	55585.5	111808	113736	106149	107411	126430	97652.2	3109.51	2749.51	2338.35	2448.51	2436.23	2966.52
KMW0280*139	3,5-Octadien-2-one	Ketone	C8H12O	38284-27-4	435526	431816	426847	407958	426180	405430	1.91936e+06	1.3235e+06	1.79657e+06	1.83146e+06	1.52899e+06	1.57456e+06	4.27303e+06	1.84374e+06	1.78503e+06	1.77334e+06	3.79914e+06	1.70492e+06	364667	375280	366560	375601	368529	369797
XMW0186*139	3,5-Octadien-2-one, (E,E)-	Ketone	C8H12O	30086-02-3	435526	431816	426847	407958	426180	405430	1.91936e+06	1.3235e+06	1.79657e+06	1.83146e+06	1.52899e+06	1.57456e+06	4.27303e+06	1.84374e+06	1.78503e+06	1.77334e+06	3.79914e+06	1.70492e+06	364667	375280	366560	375601	368529	369797
NMW0214	3-(4-Hydroxyphenyl)propanal	Aldehyde	C9H10O2	20238-83-9	1.70307e+06	1.38948e+06	2.23305e+06	1.49899e+06	1.51967e+06	1.46841e+06	2.43225e+06	2.33956e+06	2.33816e+06	2.36332e+06	2.28778e+06	1.46987e+06	2.5488e+06	2.5317e+06	2.41546e+06	2.89074e+06	2.84258e+06	2.77943e+06	660171	575558	590809	643298	653882	671149
XMW0714	3-Acetyl-1H-pyrroline	Heterocyclic compound	C6H7NO	1072-82-8	4.22341e+06	4.32613e+06	4.79658e+06	4.37087e+06	4.29651e+06	4.32545e+06	1.60665e+07	1.52645e+07	1.48288e+07	1.54098e+07	1.44349e+07	1.48513e+07	1.64324e+07	1.63488e+07	1.62842e+07	1.59739e+07	1.5426e+07	1.56288e+07	1.7333e+06	1.6656e+06	1.83584e+06	1.8608e+06	2.00442e+06	1.61645e+06
XMW0198	3-Buten-2-ol, 4-(2,6,6-trimethyl-2-cyclohexen-1-yl)-, (3E)-	Alcohol	C13H22O	25312-34-9	3135.26	2999.77	2813.91	2992.63	3247.25	3095.9	26099	25800.3	24637.1	24798	24032.8	22507.7	26616.8	26818.7	26320.9	24307.1	25148.1	25102.9	1194.46	1661.28	1204.66	1164.58	1201.11	1717.71
KMW0639	3-Buten-2-one, 4-(2,2,6-trimethyl-7-oxabicyclo[4.1.0]hept-1-yl)-	Terpenoids	C13H20O2	23267-57-4	268913	214856	344612	233915	243254	232067	364898	352027	348918	353653	342433	219527	372751	369664	373533	381381	459302	445381	95351.5	87227.1	90016.6	93437.5	94581.9	97287.4
NMW0356	3-Buten-2-one, 4-(4-hydroxy-3-methoxyphenyl)-	Ketone	C11H12O3	1080-12-2	10834.6	7422.22	7660.73	4868.34	7302.95	11031.8	10270.2	23745.6	17393.2	16816.4	17128.9	12066.2	22721.6	20310.3	23355.2	19468.8	16499.5	15875.4	4404.17	9905.18	5289.81	8016.51	4283.21	12309.4
D354	3-Cyclohexene-1-carboxAldehyde, 4-(4-hydroxy-4-methylpentyl)-	Aldehyde	C13H22O2	31906-04-4	31426.5	20220.5	23023.8	20274.1	22990.8	23604.5	50092.9	52693.5	61814.2	43050.8	40254.3	109080	72566.5	78307.8	81463	72061.9	72844.1	76540.3	14385.7	16189.1	13338.6	13861	12862.5	17272.5
D371	3-Hexen-1-ol, formate, (Z)-	Ester	C7H12O2	33467-73-1	41982.8	43625.2	49296.3	46227.2	46520.1	46729.8	131700	137656	124411	128710	133851	141512	132489	139923	135362	129469	122505	131950	13742.2	10573.8	11711.2	12092.2	12470.7	12565.3
D356	3-Methoxy-5-methylphenol	Phenol	C8H10O2	3209-13-0	35547.9	35410.4	38472.9	34610.5	35029.6	32998.8	139733	137707	120299	127866	122244	127254	126873	127131	129335	128395	119672	122486	10678.6	10597.9	10948.1	10767.7	11874	11549.3
XMW0533	3-Methylbenzothiophene	Heterocyclic compound	C9H8S	1455-18-1	11382.1	8431.43	12836.6	13026.5	13070.6	11831.5	40584.8	39447.7	38090	39261	38701.2	39601.3	40237.8	39075.4	57952.2	38620.4	40745.5	45171.8	3876.28	3581.53	3771.13	3779.25	3858.53	3824.9
KMW0202	3-Octanol	Alcohol	C8H18O	589-98-0	5161.8	2868.96	3037.5	2778.01	2743.93	2867.75	9524.05	9402.49	9602.51	9780.68	8977.68	9200.45	10708.4	11030.7	8339.02	7915.92	11327.3	7883.26	2614.95	1142.3	1882.14	1785.45	1993.9	3079.21
KMW0161*128	3-Octanone	Ketone	C8H16O	106-68-3	10121.8	10707.3	11392.3	10927.3	10764.7	10968	38200.3	31906.9	32646.1	39205.9	35834.3	31788.8	34033.6	36948	36376.3	33310.2	29108.1	34668.2	7366	5922.74	6492.23	6334.34	6532.63	6703.06
WMW0127	3-Octen-1-ol, (Z)-	Alcohol	C8H16O	20125-84-2	41828.6	42242	50554.6	46503.3	44543.1	44222.5	204496	186174	191697	201606	173302	182003	218915	217829	206065	207306	191627	204441	39971.2	38323.8	41183.6	41975.7	44909.1	38170.4
KMW0442	3-Phenylpropanol	Alcohol	C9H12O	122-97-4	32653.9	31719.9	30827.2	29040.9	32932.1	28609.4	173441	171062	169652	164352	150520	150298	199552	199534	200657	195487	175591	184125	18045.9	17056.9	18284.5	19023.5	23875.3	23018.2
D311	3-p-Menthen-7-al	Aldehyde	C10H16O	27841-22-1	295504	291144	306686	257439	295335	256167	784029	783699	735853	702175	571125	52900.9	624779	606902	541880	584682	603982	559903	114168	118485	104367	110173	121641	138339
XMW0795	3H-Indazol-3-one, 1-ethyl-1,2-dihydro-	Heterocyclic compound	C9H10N2O	54385-62-5	7.38261e+06	6.9903e+06	7.43679e+06	6.95405e+06	7.18627e+06	6.93234e+06	6.10701e+06	1.46394e+07	1.39167e+07	1.43041e+07	1.39747e+07	1.2396e+07	1.24995e+07	1.26947e+07	1.23714e+07	1.17508e+07	1.16999e+07	1.12128e+07	1.2214e+06	1.2214e+06	1.2214e+06	1.2214e+06	1.2214e+06	1.2214e+06
KMW0452*080	4-(1-methylethyl)-Benzaldehyde	Terpenoids	C10H12O	122-03-2	23608.6	23835.4	25768	22944.7	23001.4	22961.1	95905.4	91490.1	92105.1	89073	83898	87023.7	115746	113197	114169	113067	105126	109630	7544.82	7164.27	7201.88	7071.87	7711.96	7429.37
WMW0181	4-Decenoic acid, methyl ester, Z-	Ester	C11H20O2	7367-83-1	508484	509961	555494	503311	509664	467264	1.60376e+06	1.57051e+06	1.52383e+06	1.59749e+06	1.54743e+06	1.56989e+06	1.63036e+06	1.59064e+06	2.37171e+06	1.54334e+06	1.63562e+06	1.82587e+06	142580	136656	139179	141403	152636	142668
XMW0434	4-Hexen-1-ol, acetate	Alcohol	C8H14O2	72237-36-6	164806	168450	191005	170010	166619	168931	936683	805666	873225	906171	774756	813189	1.02044e+06	1.02261e+06	1.00925e+06	987659	889707	961258	101324	97609.5	105938	106856	113905	95890
NMW0243*125	4-MethoxycinnamAldehyde	Aldehyde	C10H10O2	1963-36-6	12846.5	11380.1	12014.8	10799.1	10768.7	12025.1	21426.8	19065.7	22497.7	19987.3	17531.1	16362.2	19032.6	19777.6	18432.6	19140.9	18761.3	18524.1	7748.3	8493.94	8797.7	8656.71	8036.21	6866.23
XMW0574	4-Penten-1-ol, propanoate	Ester	C8H14O2	30563-30-5	770930	815709	875184	829739	825957	815837	2.29455e+06	2.19659e+06	2.21224e+06	2.43821e+06	2.12943e+06	2.15741e+06	2.24793e+06	2.32018e+06	2.26212e+06	2.20271e+06	1.99157e+06	2.18422e+06	427744	417751	433003	470065	445573	398473
D245	4-Phenyl-2-butanol	Alcohol	C10H14O	2344-70-9	17481.7	16904.6	19562.8	21122.8	21285.9	20363.3	67280.9	64386.4	65619.5	61773.8	58744.6	59080.6	80140.4	77304.6	77657.5	77867.6	71888.3	75522.9	4791.94	4650.19	4686.47	4790.78	4606.27	4648.9
XMW0361	5,7-Octadien-4-one, 2,6-dimethyl-, (E)-	Terpenoids	C10H16O	6752-80-3	54758.6	43072.7	42815.9	34166.5	41854.9	41876.3	206186	190340	208856	173733	146026	106072	188008	178284	176960	185332	204341	174953	12767	14761.3	10256.2	11116.2	12971.6	17298.7
XMW0456	5,8-Decadien-2-one, 5,9-dimethyl-, (E)-	Ketone	C12H20O	130876-99-2	319657	291000	349804	325643	321914	313683	1.17587e+06	1.14132e+06	1.12483e+06	1.14747e+06	1.12356e+06	1.13242e+06	1.15985e+06	1.16012e+06	1.13996e+06	1.12176e+06	1.09714e+06	1.12622e+06	83794.6	77002.3	77838.8	81783.6	88868.4	82183.8
WMW0095	5,9-Undecadien-2-ol, 6,10-dimethyl-	Alcohol	C13H24O	53837-34-6	524660	388888	541368	398048	411135	403924	993497	1.04822e+06	947675	1.03067e+06	969969	688357	835224	838626	847668	1.07977e+06	1.04884e+06	988537	247771	230042	231562	249072	257293	250608
WMW0089*085	5,9-Undecadien-2-one, 6,10-dimethyl-	Terpenoids	C13H22O	689-67-8	5.75398e+06	6.01211e+06	5.82306e+06	6.08737e+06	6.45792e+06	6.21436e+06	1.30361e+07	1.65801e+07	1.2413e+07	1.62998e+07	1.23977e+07	1.21684e+07	1.81992e+07	1.81715e+07	1.78773e+07	1.67528e+07	1.6676e+07	1.60384e+07	4.13099e+06	3.98151e+06	3.9982e+06	4.07725e+06	4.2909e+06	4.16244e+06
KMW0563*085	5,9-Undecadien-2-one, 6,10-dimethyl-, (E)-	Ketone	C13H22O	3796-70-1	5.75398e+06	6.01211e+06	5.82306e+06	6.08737e+06	6.45792e+06	6.21436e+06	1.30361e+07	1.65801e+07	1.2413e+07	1.62998e+07	1.23977e+07	1.21684e+07	1.81992e+07	1.81715e+07	1.78773e+07	1.67528e+07	1.6676e+07	1.60384e+07	4.13099e+06	3.98151e+06	3.9982e+06	4.07725e+06	4.2909e+06	4.16244e+06
KMW0431	5H-5-Methyl-6,7-dihydrocyclopentapyrazine	Heterocyclic compound	C8H10N2	23747-48-0	961079	806395	825902	705573	802739	803666	3.26847e+06	3.1035e+06	4.32115e+06	3.00473e+06	2.88778e+06	2.3353e+06	3.87746e+06	3.95296e+06	3.40807e+06	3.53387e+06	3.94851e+06	3.32572e+06	336910	327120	341569	331723	350662	351069
XMW0423	6,8-Nonadien-2-one, 8-methyl-5-(1-methylethyl)-, (E)-	Ketone	C13H22O	54868-48-3	264072	240731	277384	286813	304879	295155	912018	905833	866342	896137	854506	723523	1.08697e+06	1.07997e+06	1.0638e+06	993936	992613	923627	274943	262047	263043	254579	256196	278803
WMW0057	6-Nonenal, (Z)-	Aldehyde	C9H16O	2277-19-2	1.17218e+06	1.13341e+06	1.23544e+06	1.076e+06	1.17377e+06	1.14105e+06	5.73274e+06	5.052e+06	5.30954e+06	7.70766e+06	4.59103e+06	4.55979e+06	1.11054e+07	6.18948e+06	4.56007e+06	4.47413e+06	5.83654e+06	4.33442e+06	996090	994702	992414	1.0061e+06	1.02044e+06	1.0085e+06
NMW0113	6-Octen-1-ol, 3,7-dimethyl-, formate	Terpenoids	C11H20O2	105-85-1	184802	197119	218109	193324	193322	188351	469139	445315	457720	429247	402730	421959	556794	539957	545897	544608	494706	525983	52099.6	45627	52081.5	48528.1	56573.9	47559.8
KMW0209*089	7-Oxabicyclo[2.2.1]heptane, 1-methyl-4-(1-methylethyl)-	Terpenoids	C10H18O	470-67-7	103.617	103.617	777.106	616.643	912.522	752.907	15229.6	13892.3	15172.2	14067.6	12805.1	12545.5	23345.5	21667.3	20071.2	20543.4	18459.5	20227.1	103.617	555.189	518.083	535.391	564.639	103.617
XMW0931	8,9-Dehydrothymol	Phenol	C10H12O	18612-99-2	6632.39	5720.84	6245.42	5538.74	5973.64	5741.8	15883.2	15032	17019.6	15222.8	15458.2	14239	20971.3	22278.7	20967.4	20683.8	20750.6	23710.3	4568.43	4238.22	4155.56	4145.65	4616.91	4360.29
NMW0171	Acetic Acid, phenoxy-	Acid	C8H8O3	122-59-8	412745	327574	426780	323937	392230	331136	1.17932e+06	1.14675e+06	1.12704e+06	1.15148e+06	1.10914e+06	877281	1.39062e+06	1.39231e+06	1.35441e+06	1.27808e+06	1.26937e+06	1.20079e+06	1.1395e+06	1.1355e+06	1.14419e+06	1.12881e+06	1.35104e+06	1.12872e+06
KMW0437	Acetic acid, 2-phenylethyl ester	Ester	C10H12O2	103-45-7	7204.6	7172.36	7952.04	6916.46	6986.03	6664.73	22468.3	21387.2	21998.1	20226.5	19669.2	20158.5	26774.1	26665.7	27157.4	26024.3	24282.3	26404.7	1715.55	1633.1	1717.92	1640.4	1799.23	1608.39
KMW0214	Acetylpyrazine	Heterocyclic compound	C6H6N2O	22047-25-2	313940	323918	369819	336293	331806	323408	1.47617e+06	1.42063e+06	1.3972e+06	1.42073e+06	1.34326e+06	1.37565e+06	1.63492e+06	1.63703e+06	1.62304e+06	1.58048e+06	1.53796e+06	1.55311e+06	124893	124169	136981	138511	148781	120696
KMW0596*059	Alloaromadendrene	Terpenoids	C15H24	25246-27-9	972485	975414	2.65884e+06	2.37242e+06	2.44946e+06	975651	2.80032e+06	2.6258e+06	5.69678e+06	2.5209e+06	5.76847e+06	2.89786e+06	5.46935e+06	5.52072e+06	5.41664e+06	5.01852e+06	5.00011e+06	4.75017e+06	1.25867e+06	1.1961e+06	1.20308e+06	1.25027e+06	1.30663e+06	1.28566e+06
NMW0296	Apiol	Heterocyclic compound	C12H14O4	523-80-8	65319	48472.2	67347.9	60850.1	64568.2	61044.5	545249	438830	404781	411500	415960	423282	998212	795213	957029	723147	958485	700260	25997	19236.9	15521.5	18426.5	15820.5	25068.2
NMW0132	Azulene	Aromatics	C10H8	275-51-4	2398.04	2075.89	3569.83	3524.48	2648.86	2965.04	11703.2	8623.87	8565.62	9779.92	9571.76	9907.77	9797.8	9721.15	9949.15	9594.06	8494.77	9102.37	766.255	837.177	811.522	855.588	881.275	908.579
XMW1457	BenzAldehyde, 3-methoxy-	Aldehyde	C8H8O2	591-31-1	135619	121482	122582	91603.6	128159	103095	558541	589696	570762	552676	622921	329404	593734	596853	575198	561161	648819	526517	63359.2	55045.8	52781.9	52261.7	52886.7	69726.5
D219	BenzAldehyde, 4-methoxy-	Aldehyde	C8H8O2	123-11-5	40348.4	40258	54365.4	47767.9	47472.6	45106.7	164210	158252	159743	150578	144025	148234	198299	191866	195272	193541	176558	186709	14072.9	10200.5	13757.2	13700.3	14674.7	14142
NMW0778	Benzene, (1-methylethyl)-	Aromatics	C9H12	98-82-8	1.47692e+06	1.52083e+06	1.70866e+06	1.58326e+06	1.60688e+06	1.62082e+06	4.97555e+06	4.298e+06	4.73313e+06	4.97533e+06	4.16264e+06	4.52033e+06	5.00243e+06	5.30868e+06	5.1286e+06	4.93966e+06	4.59958e+06	5.0077e+06	469448	445998	494853	494924	532025	428821
NMW0794	Benzene, (1-methylpropyl)-	Aromatics	C10H14	135-98-8	273843	275344	304508	283000	275655	267221	459598	397291	429239	448407	390952	494531	685776	447701	678184	666820	405343	665307	113064	119351	120528	116464	129154	114983
XMW1439	Benzene, (1-nitropropyl)-	Aromatics	C9H11NO2	5279-14-1	679821	544520	740820	559297	680166	528183	2.53053e+06	2.45419e+06	2.42234e+06	2.43192e+06	2.3554e+06	2.4025e+06	2.45864e+06	2.44802e+06	2.42998e+06	2.39859e+06	2.29955e+06	2.37933e+06	160382	158753	165588	160060	176726	161707
D113	Benzene, (2,2-dimethoxyethyl)-	Aromatics	C10H14O2	101-48-4	1457.27	1475.69	1636.51	1475.98	1633.71	1487.46	5677.51	5505.3	5627.02	5421.25	4738.73	4788.9	6293.4	6150.01	6650.91	6650.32	5997.14	5978.02	866.588	737.313	712.668	856.864	907.869	845.981
KMW0384	Benzene, (2-nitroethyl)-	Aromatics	C8H9NO2	6125-24-2	17415.1	15707.5	18945.9	17942.6	17560	17052.5	64710.2	62772.1	62120.1	62648.7	61284.3	62948.6	62989.3	63720.2	62673.1	61298.1	60496.1	62104.8	4561.03	4019.56	4413.75	4379.59	4636.62	4475.64
XMW1464	Benzene, (butoxymethyl)-	Ether	C11H16O	588-67-0	108655	104909	118377	105833	104456	105279	347673	320359	338148	323091	311930	317770	425445	415526	424944	419963	388559	418530	33700.2	32654.5	27104.9	33193.4	35872	32919.1
XMW0366*027	Benzene, 1,2,3,5-tetramethyl-	Aromatics	C10H14	527-53-7	805260	767130	954102	807675	922224	992360	6.07483e+06	5.16997e+06	6.29243e+06	5.46619e+06	4.41069e+06	3.10109e+06	5.29339e+06	5.18441e+06	5.07174e+06	5.23175e+06	5.90039e+06	4.73417e+06	404515	393486	410353	408058	296369	413801
KMW0634*103	Benzene, 1,2,3-trimethoxy-5-(1-propenyl)-, (E)-	Aromatics	C12H16O3	5273-85-8	6364.52	6510.16	7050.79	7721.13	6363.85	5910.98	16568.1	18151.7	17113.7	17491.2	17306.7	17967.2	17459.6	18818.4	17698.2	17732.2	16996.8	16401	5629.77	4243.15	4821.74	4746.29	4647.89	4500.15
KMW0273*027	Benzene, 1,2,4,5-tetramethyl-	Aromatics	C10H14	95-93-2	805260	767130	954102	807675	922224	992360	6.07483e+06	5.16997e+06	6.29243e+06	5.46619e+06	4.41069e+06	3.10109e+06	5.29339e+06	5.18441e+06	5.07174e+06	5.23175e+06	5.90039e+06	4.73417e+06	404515	393486	410353	408058	296369	413801
NMW0164	Benzene, 1,2-(methylenedioxy)-4-propenyl-, (E)-	Aromatics	C10H10O2	4043-71-4	1.21605e+06	1.10776e+06	1.25875e+06	1.09639e+06	1.15922e+06	1.12124e+06	3.5767e+06	3.52522e+06	3.40332e+06	3.50331e+06	3.35052e+06	2.58182e+06	4.269e+06	4.26723e+06	4.20017e+06	3.8915e+06	3.90032e+06	3.64189e+06	1.72017e+06	1.62356e+06	1.67481e+06	1.90231e+06	2.10555e+06	1.69281e+06
KMW0504	Benzene, 1-ethenyl-4-methoxy-	Aromatics	C9H10O	637-69-4	139957	129214	137853	124006	132827	130755	1.01543e+06	925036	1.08316e+06	1.06184e+06	806199	429364	1.122e+06	1.18552e+06	1.03166e+06	1.09123e+06	1.23087e+06	921913	75368.9	71757	69670.1	72023.4	75239.6	73292.9
XMW0540	Benzene, 1-methoxy-4-methyl-2-(1-methylethyl)-	Aromatics	C11H16O	31574-44-4	159993	160033	160167	153840	164469	150994	1.07778e+06	1.07189e+06	1.0715e+06	1.01821e+06	939682	937791	1.21477e+06	1.21213e+06	1.24515e+06	1.20167e+06	1.10981e+06	1.12448e+06	83867.1	78586.1	81535.6	85435.6	87846.2	83731.7
NMW0192	Benzene, 1-methoxy-4-nitro-	Aromatics	C7H7NO3	100-17-4	30139.9	26651.2	32476.2	27657.6	29836.8	27833.1	7459.67	61485.4	58240.7	59910.1	58476.1	52350.6	51548.5	52907.3	51080.4	49049.5	49625.3	46759.4	1491.93	1491.93	1491.93	1491.93	1491.93	1491.93
XMW0982	Benzene, [1-[[1-(1-methylethyl)-3-butenyl]oxy]ethyl]-, [S-(R*,R*)]-	Aromatics	C15H22O	98088-51-8	2.50079e+06	2.32023e+06	2.58322e+06	2.3513e+06	2.42088e+06	2.35437e+06	5.18618e+06	5.2098e+06	4.92641e+06	5.10937e+06	4.97807e+06	4.30602e+06	4.90519e+06	4.96558e+06	4.85609e+06	4.54844e+06	4.53242e+06	4.31997e+06	328308	314312	332247	335701	330638	321127
D301	BenzeneacetAldehyde, .alpha.-(2-methylpropylidene)-	Aldehyde	C12H14O	26643-91-4	9004.89	7855.68	8974.74	8013.41	8209.75	7837.79	27667.6	27413.1	26112	26695.5	25843.7	20015.8	26135.6	32596.8	25650.1	23442.1	23418.5	22127	6068.64	5866.86	5397.82	5620.97	6070.94	6063.06
D173	BenzeneacetAldehyde, 4-methyl-	Aldehyde	C9H10O	104-09-6	322709	309023	324956	268649	307612	283389	1.82005e+06	1.43727e+06	1.88802e+06	1.64459e+06	1.3528e+06	964469	1.60595e+06	1.58879e+06	1.62436e+06	1.67261e+06	1.71324e+06	1.50596e+06	115459	112051	118829	116708	120985	119748
KMW0445	Benzeneacetic acid	Acid	C8H8O2	103-82-2	203655	259107	231631	256215	254987	202478	651957	605175	635852	608352	590203	600493	793045	778632	796244	789208	730900	787927	68407.7	65619.9	68432.1	68498	74513.5	67180.8
KMW0441	Benzeneacetic acid, ethyl ester	Ester	C10H12O2	101-97-3	44736.3	43238.9	48140.5	41651.8	45381.9	43114.6	236434	229535	230908	220353	202852	203468	267249	267038	269116	265159	235011	248842	25933.7	24288.4	26844	24672.3	26829	24766.1
NMW0111	BenzeneethanAmine, N,.alpha.,.alpha.-trimethyl-	Amine	C11H17N	100-92-5	123695	158666	168724	159388	153019	143940	207014	212651	173992	187420	192658	182602	212019	213869	204209	208024	200998	205896	75463.4	68247.8	75364	77918.1	87527	73178.2
KMW0408	Benzenemethanol, .alpha.,.alpha.,4-trimethyl-	Terpenoids	C10H14O	1197-01-9	1.50915e+06	1.22558e+06	1.22684e+06	922366	1.28765e+06	1.03205e+06	5.56153e+06	5.91993e+06	7.29148e+06	5.52823e+06	6.17198e+06	3.17214e+06	5.78916e+06	5.81793e+06	5.61551e+06	5.47611e+06	6.54691e+06	5.14654e+06	637982	549767	521302	525605	533542	700464
D139	Benzenepropanol, .alpha.,.alpha.-dimethyl-	Alcohol	C11H16O	103-05-9	172544	168994	185820	175473	171766	169964	811202	790994	908220	772289	751076	769715	876069	858504	880091	868996	783087	842205	65945.5	62805.4	64124	55405.7	69693.6	67204.9
NMW0011	Benzofuran	Heterocyclic compound	C8H6O	271-89-6	15018.7	15644.5	16257.8	16392.1	16051.9	15693.4	32842.9	29514.8	31626.8	33216.3	27679.1	34757.8	31450.9	32535.6	35405.1	30875.5	31708.1	31231.8	6178.58	6864.7	6654.2	6758.95	7279.47	6591.97
NMW0197	Benzoic Acid, 4-methoxy-	Acid	C8H8O3	100-09-4	1.29358e+06	1.29358e+06	1.29358e+06	1.29358e+06	1.29358e+06	1.29358e+06	7.62067e+06	7.76658e+06	7.57827e+06	7.62225e+06	7.36651e+06	1.63129e+07	6.46792e+06	9.06315e+06	9.94802e+06	1.56444e+07	1.55256e+07	1.47124e+07	1.29358e+06	1.29358e+06	1.29358e+06	1.29358e+06	1.29358e+06	1.29358e+06
KMW0462	Benzoic acid	Acid	C7H6O2	65-85-0	181256	175520	171953	24495	24495	164845	263421	264511	269485	236292	183682	128835	242006	253038	192957	223591	196351	205766	24495	24495	24495	24495	24495	24495
XMW0287	Benzoic acid, 2-methylpropyl ester	Ester	C11H14O2	120-50-3	252124	229060	275918	258104	254400	246736	933836	906034	892023	908190	889962	902544	921039	919944	905377	890459	870530	895314	64908.7	60281.2	61092.9	64976.1	69250	64472.8
XMW0776	Benzoic acid, 2-propenyl ester	Ester	C10H10O2	583-04-0	106321	104953	113641	101142	100747	96843.2	329619	315337	320428	300328	283607	293328	389411	375802	382510	382809	353805	374289	23332.6	23146.8	23551.5	28655.4	31676.6	22386.7
XMW1189	Benzoic acid, 3,5-dihydroxy-, methyl ester	Ester	C8H8O4	2150-44-9	9592.75	58060.5	13774.2	60030.5	12879.7	15212.2	86510.4	142683	31844.2	142631	162421	422198	271936	327390	325276	286471	197015	314136	27202.8	6454.68	4658.39	25012.6	23175.2	27286.1
XMW0657	Benzoxazole, 2-methyl-	Heterocyclic compound	C8H7NO	95-21-6	29626	28479.3	28967.9	25012.4	27511.4	26491.9	250785	231509	251410	232784	221189	145229	241325	247049	223465	232122	213975	207383	11833.1	11042	11479	11352.6	11280.5	11581.5
KMW0323	Benzyl Alcohol	Alcohol	C7H8O	100-51-6	634596	649939	681565	660522	658822	651594	2.97311e+06	2.79274e+06	2.76369e+06	2.84179e+06	2.63855e+06	2.46338e+06	3.25458e+06	3.24872e+06	3.21461e+06	3.14341e+06	3.05382e+06	3.08387e+06	322622	313532	338485	273198	278064	308345
XMW0971	Benzyl angelate	Ester	C12H14O2	37526-87-7	1.41215e+06	1.26893e+06	1.43124e+06	1.32238e+06	1.33613e+06	1.29486e+06	1.88245e+06	1.74598e+06	1.84727e+06	1.7737e+06	1.7581e+06	1.97758e+06	1.81725e+06	1.80934e+06	1.81862e+06	1.71532e+06	1.75901e+06	1.68619e+06	748192	587144	573585	739502	764997	788977
XMW0933	Bicyclo[3.1.1]hept-2-en-6-ol, 2,7,7-trimethyl-, acetate, [1S-(1.alpha.,5.alpha.,6.beta.)]-	Ester	C12H18O2	50764-55-1	17967.5	18167.1	25459.3	16652.4	18442.4	22192.4	117697	115205	116953	114076	110485	106875	127279	130917	133145	131266	125811	123035	14114.7	13567.6	14155.5	9997.16	15368.7	13903.6
XMW0468	Bicyclo[3.1.1]hept-2-ene, 2,6-dimethyl-6-(4-methyl-3-pentenyl)-	Terpenoids	C15H24	17699-05-7	4.1426e+06	3.92092e+06	4.17776e+06	3.91919e+06	4.25475e+06	4.01072e+06	5.41855e+06	5.00936e+06	5.68689e+06	5.09046e+06	5.06664e+06	5.74282e+06	5.31275e+06	5.30409e+06	5.32169e+06	5.05006e+06	5.20507e+06	4.96973e+06	2.18406e+06	2.11544e+06	2.12226e+06	2.15688e+06	2.22736e+06	2.30586e+06
NMW0073	Bicyclo[3.1.1]hept-2-ene-2-carboxaldehyde, 6,6-dimethyl-	Terpenoids	C10H14O	564-94-3	37369.9	34767.6	35819.1	28169.1	37026.2	29132.9	162910	168355	165887	159305	181356	106252	155926	160913	152944	149970	175490	140139	17893	15779	14752.6	14734.3	14897.5	19701.2
XMW0264*152	Bicyclo[4.4.0]dec-1-ene, 2-isopropyl-5-methyl-9-methylene-	Terpenoids	C15H24	150320-52-8	9.02236e+06	8.81264e+06	8.53841e+06	8.79061e+06	8.87761e+06	8.86868e+06	2.45369e+07	3.42199e+07	2.37214e+07	3.24021e+07	2.39388e+07	2.30538e+07	3.13974e+07	3.01216e+07	2.95796e+07	3.05908e+07	3.05863e+07	2.42384e+07	7.09339e+06	6.97048e+06	6.93955e+06	7.02372e+06	7.09622e+06	7.26252e+06
XMW0548	Bicyclo[7.2.0]undecane, 10,10-dimethyl-2,6-bis(methylene)-, [1S-(1R*,9S*)]-	Terpenoids	C15H24	136296-38-3	3.15154e+06	2.80546e+06	3.18114e+06	2.79432e+06	2.89893e+06	2.85964e+06	4.68546e+06	4.70067e+06	4.37034e+06	4.70772e+06	4.48049e+06	3.70243e+06	6.16879e+06	6.21564e+06	6.05277e+06	5.6548e+06	5.63125e+06	5.42064e+06	1.50816e+06	1.44221e+06	1.44704e+06	1.5031e+06	1.55997e+06	1.5331e+06
NMW0166	Biphenyl	Aromatics	C12H10	92-52-4	13447.4	11960.1	13109.7	11431.2	12667.6	12157.6	36286	35593.3	35151.7	35652.6	34661.2	26435.5	44067.6	43962.1	42654.6	40928.5	40768.5	37720.6	2286.25	2286.25	2286.25	2286.25	2286.25	2286.25
NMW0781	Butanoic Acid, 4-hydroxy-	Acid	C4H8O3	591-81-1	37520.6	38911.7	39519.2	37551.9	37084.3	38313.2	116936	104046	112045	115959	100283	106148	115547	122093	117394	114367	108273	114278	7416.86	7416.86	7416.86	7416.86	7416.86	7416.86
D388	Butanoic acid, 1-phenylethyl ester	Ester	C12H16O2	3460-44-4	42004.6	38866.6	43595.3	37993.6	39367.1	39056.3	121696	122016	117022	118983	113836	89448.7	145546	144981	141577	132850	132758	125304	83730.5	82165.4	81412.7	83963.8	101180	81824.7
KMW0151	Butanoic acid, 3-hydroxy-, ethyl ester	Ester	C6H12O3	5405-41-4	73556.2	76111.7	84598.7	79313.2	79756.1	80788.6	254251	218536	240339	253323	214072	231400	254484	268827	260468	251235	233933	254741	24391.7	23543.4	26168.6	26351.4	27842.3	23378.7
w31	Butanoic acid, 4-hexenyl ester, (Z)-	Ester	C10H18O2	69727-41-9	81681.5	74621.8	73517.1	65052.9	75895.9	69515.6	122197	142078	131681	116392	160274	124790	149064	145918	122907	136945	135844	130017	31810.8	13404.1	27522.6	28059.4	27372.3	13624.4
KMW0511	Butyl benzoate	Ester	C11H14O2	136-60-7	67080.6	62324.9	70778.9	56714.5	64786.9	58848	199230	196105	190264	194066	186026	149405	242711	241015	236674	221344	218930	208391	44201.6	42752.9	42751.9	43361.4	45501.4	46351.9
XMW1444*107	Carvenone	Terpenoids	C10H16O	499-74-1	304732	374403	398354	377115	359674	342783	857263	292869	244280	850081	836454	289077	716444	729219	650116	663499	676022	641749	143115	127534	146470	142749	163982	135629
D452	Carvone oxide, trans-	Heterocyclic compound	C10H14O2	39903-97-4	380069	371691	407819	360250	361285	344514	1.18303e+06	1.13465e+06	1.15067e+06	1.07838e+06	1.02527e+06	1.04956e+06	1.4178e+06	1.36952e+06	1.38992e+06	1.39209e+06	1.26901e+06	1.34337e+06	82162.7	80174.9	83625.1	80269.2	113138	79883.8
KMW0522*146	Copaene	Terpenoids	C15H24	3856-25-5	292180	263468	295507	264390	274322	259994	1.11165e+06	1.11795e+06	1.0553e+06	1.09402e+06	1.05443e+06	777823	1.33558e+06	1.32925e+06	1.32495e+06	1.21613e+06	1.22026e+06	1.12219e+06	288523	282260	297566	284891	287319	304397
XMW1036	Cyclobuta[1,2:3,4]dicyclooctene, 1,2,5,6,6a,6b,7,8,11,12,12a,12b-dodecahydro-, (6a.alpha.,6b.beta.,12a.alpha.,12b.beta.)-	Hydrocarbons	C16H24	61277-44-9	67587.7	44255.2	60645.4	54981.3	59950.9	62343.6	161083	151181	185467	191009	193419	338031	235942	267111	265078	242006	221813	255304	34201.1	33974.9	33800.2	33595.1	27592	37278.6
XMW1055	Cyclobutanecarbonitrile, 3,3-dimethyl-	Nitrogen compounds	C7H11N	53783-86-1	23268.9	23816.2	26208.4	25057.2	25475.2	25620.1	80676.3	71863	76677.3	79636.3	69441.2	73001.7	79667.7	84596.6	82138.9	78359.9	74467.1	79031.6	8610.57	5977.42	6273.58	6707.91	7069.87	7450.55
XMW0519	Cyclobutanespiro-2'-bicyclo[1.1.0]butane-4'-spirocyclobutane	Hydrocarbons	C10H14	76308-11-7	5.00927e+06	5.16793e+06	5.79235e+06	5.40258e+06	5.45483e+06	5.51369e+06	1.60556e+07	1.37984e+07	1.52019e+07	1.58773e+07	1.34243e+07	1.44575e+07	1.61662e+07	1.70793e+07	1.6427e+07	1.58666e+07	1.46854e+07	1.6145e+07	1.6168e+06	1.27725e+06	1.40697e+06	1.43947e+06	1.53364e+06	1.47575e+06
XMW0709	Cyclohexane, 1-methylene-4-(1-methylethenyl)-	Terpenoids	C10H16	499-97-8	4.002e+06	4.0927e+06	4.3451e+06	4.30337e+06	4.02431e+06	4.05911e+06	9.11096e+06	8.26122e+06	8.56254e+06	9.00273e+06	7.40906e+06	8.59747e+06	8.27434e+06	8.4246e+06	8.07915e+06	7.96553e+06	7.17663e+06	8.04838e+06	1.4933e+06	1.77203e+06	1.59802e+06	1.74278e+06	1.95008e+06	1.74521e+06
XMW0228	Cyclohexanol, 1-ethenyl-	Alcohol	C8H14O	1940-19-8	63407.4	66547.3	67926.4	64548.6	62997.2	64880	124725	120843	118838	119608	113298	103106	116516	117352	115024	113314	107544	110991	34545.3	34522.4	36255.2	35920.2	36734	32931.3
NMW0129	Cyclohexanol, 1-methyl-4-(1-methylethenyl)-, acetate	Ester	C12H20O2	10198-23-9	458607	403649	500429	461651	456926	443601	1.72586e+06	1.68212e+06	1.64776e+06	1.6614e+06	1.61906e+06	1.64958e+06	1.67615e+06	1.66725e+06	1.94719e+06	1.62339e+06	1.55157e+06	1.6201e+06	174576	134972	109035	137038	124075	139478
KMW0334	Cyclohexanone, 5-methyl-2-(1-methylethyl)-	Terpenoids	C10H18O	10458-14-7	328.398	328.398	1671.49	328.398	328.398	1641.99	5409.02	4177.49	5134.88	4969.69	5102.65	7457.04	6170.51	5983.1	6896.88	6445.26	6283.69	5718.52	2157.9	2252.79	3688.2	2411.22	1926.69	2413.55
XMW0801	Cyclohexene, 3,4-diethenyl-1,6-dimethyl-	Hydrocarbons	C12H18	61142-14-1	10236.8	10131.6	10149.7	10042.2	9803.77	9669.56	18316.3	17676.2	18934	17599.6	15810.2	18044.9	22139.5	22467.9	22233.3	23729.2	18375.1	21707.7	9589.12	9620.38	9232.35	6805.65	9587.03	9658.2
XMW1058	Cyclopentanol, acetate	Ester	C7H12O2	933-05-1	363483	376573	426515	396580	400521	406778	1.31464e+06	1.1796e+06	1.26007e+06	1.32004e+06	1.14041e+06	1.21003e+06	1.13584e+06	1.19884e+06	1.3507e+06	1.12704e+06	1.23055e+06	1.12984e+06	118817	115074	125220	129109	138215	110473
D390	Cyclopentanone, 2-(2-hexenyl)-	Ketone	C11H18O	34687-46-2	187741	187912	205773	186357	189085	173731	883790	858242	855331	850297	822787	842167	860704	857482	853938	845226	795155	836476	55793.4	54456.5	57426.5	55568.1	60978.9	55769.1
KMW0217	D-Limonene	Terpenoids	C10H16	5989-27-5	6.02285e+06	6.19585e+06	6.56009e+06	6.18417e+06	6.21542e+06	6.17894e+06	3.01451e+07	2.86831e+07	3.0195e+07	2.94781e+07	2.71816e+07	2.76113e+07	3.4289e+07	3.40911e+07	3.39707e+07	3.32788e+07	3.22434e+07	3.26639e+07	2.70208e+06	2.53148e+06	2.7302e+06	2.7377e+06	2.92715e+06	2.52088e+06
NMW0048	DextroamphetAmine	Amine	C9H13N	51-64-9	21558.2	24153	24747.6	20177.6	23228.8	20955.9	65495.5	63044.5	66807.9	64025.5	56780.4	45721.9	63182.8	65372.6	57867.1	59925.9	58896.6	58894.4	4035.53	4035.53	4035.53	4035.53	4035.53	4035.53
XMW1182	Di-epi-.alpha.-cedrene-(I)	Terpenoids	C15H24	21996-77-0	678260	615761	705996	619104	645112	635252	1.91975e+06	1.8885e+06	1.81609e+06	1.87088e+06	1.78977e+06	1.41713e+06	2.5496e+06	2.54102e+06	2.48611e+06	2.34497e+06	2.32918e+06	2.20866e+06	494988	466213	476669	498302	505936	494313
WMW0085	Diethyl diSulfur compounds	Sulfur compounds	C4H10S2	110-81-6	208223	216964	244613	227278	227766	232807	732920	628540	697717	733410	610568	664819	737771	779373	757166	725824	679337	736871	67135.7	62556.2	69201	69965.5	74671.9	61090.8
KMW0141	Dimethyl sulfone	Sulfur compounds	C2H6O2S	67-71-0	2.41377e+06	2.50821e+06	2.8102e+06	2.6248e+06	2.64386e+06	2.68937e+06	7.47443e+06	7.81067e+06	7.06359e+06	7.56236e+06	7.57297e+06	6.72177e+06	7.53121e+06	7.9787e+06	7.62118e+06	7.39138e+06	6.92638e+06	7.49827e+06	789842	753067	672053	686680	733427	723516
D299	Ethanol, 2-(3,3-dimethylcyclohexylidene)-, (Z)-	Alcohol	C10H18O	26532-23-0	338410	373392	414118	373398	367386	356376	772677	732832	751076	705202	662798	691421	894733	868424	876750	876678	806154	865959	114010	106585	114298	116325	130751	111194
XMW0926*080	Ethanone, 1-(2,4-dimethylphenyl)-	Ketone	C10H12O	89-74-7	23608.6	23835.4	25768	22944.7	23001.4	22961.1	95905.4	91490.1	92105.1	89073	83898	87023.7	115746	113197	114169	113067	105126	109630	7544.82	7164.27	7201.88	7071.87	7711.96	7429.37
KMW0457	Ethanone, 1-(2-aminophenyl)-	Ketone	C8H9NO	551-93-9	258918	247646	281329	261920	258261	248002	988685	970470	974357	907233	896542	904590	925491	919122	918027	906376	893363	900975	84572.8	81149	65141.4	81908.7	89652.3	83866.2
XMW0689	Ethanone, 1-(3,5-dimethylpyrazinyl)-	Heterocyclic compound	C8H10N2O	54300-08-2	229252	208380	212544	164257	218520	169354	16883.1	1.13446e+06	16883.1	905819	831768	500235	881487	894234	850991	819170	1.06545e+06	776615	107400	89241	84415.7	85425.6	86497.9	117788
XMW0583	Ethanone, 1-(3-hydroxyphenyl)-	Ketone	C8H8O2	121-71-1	5.05363e+06	4.80598e+06	5.23309e+06	4.82314e+06	4.9369e+06	4.83398e+06	9.89582e+06	4.41161e+06	9.56133e+06	9.63223e+06	9.46034e+06	8.3938e+06	8.40239e+06	8.43012e+06	8.24977e+06	8.02777e+06	7.96556e+06	7.53596e+06	2.62576e+06	2.5215e+06	2.54795e+06	2.62848e+06	2.72326e+06	2.71673e+06
XMW0676*036	Ethanone, 1-(3-methylphenyl)-	Ketone	C9H10O	585-74-0	272919	249875	255015	230223	261848	236177	725487	714431	767878	703803	683594	443907	711592	730282	667000	671033	734306	626845	141067	139218	134549	129918	134316	145729
D392	Ethanone, 1-(3-pyridinyl)-	Heterocyclic compound	C7H7NO	350-03-8	96299.9	91923.3	95616	79630.1	91853.8	84329.3	540605	423648	561326	487421	403673	287068	477479	473043	480672	496458	509043	445653	34140.1	33752.7	35051.6	34711.6	35651.7	35036.2
XMW0618	Ethyl 9-decenoate	Ester	C12H22O2	67233-91-4	91082.3	83176	93933.2	78953.7	85792.9	81337.7	410044	337693	393821	398842	380518	308138	480335	478643	468292	441257	441655	411412	270779	261026	263652	271302	278962	275027
NMW0784	Ethyl tiglate	Ester	C7H12O2	5837-78-5	7652.5	7680.87	9126.51	8416.42	8373.93	6969.77	24061.5	25136.3	22950.6	24480.6	24346.6	25314.3	24279.6	25435.5	24449.1	23062.1	22271.2	24111.3	1868.15	1963.79	2117.8	2112.52	2309.53	2054.06
KMW0218*089	Eucalyptol	Terpenoids	C10H18O	470-82-6	103.617	103.617	777.106	616.643	912.522	752.907	15229.6	13892.3	15172.2	14067.6	12805.1	12545.5	23345.5	21667.3	20071.2	20543.4	18459.5	20227.1	103.617	555.189	518.083	535.391	564.639	103.617
XMW0065	Fomepizole	Heterocyclic compound	C4H6N2	7554-65-6	341623	352858	399049	370458	373523	379740	1.07097e+06	1.11186e+06	1.0087e+06	1.05212e+06	1.07602e+06	1.13724e+06	1.07348e+06	1.13918e+06	1.08708e+06	1.05771e+06	987974	1.07297e+06	110580	105986	117106	117916	102938	101041
XMW0438*013	Furan, 2-(1-pentenyl)-, (E)-	Heterocyclic compound	C9H12O	20992-69-2	67828.7	69476.3	73118	72147.7	67150.1	69420.7	82289.8	69022.1	76016.6	77669.2	71525.8	107404	101544	104309	97452.8	96772.2	84969	99628.4	20148.1	20735.4	21136.7	19901.7	22747.1	30215.4
XMW0218	Hexadecane, 7,9-dimethyl-	Hydrocarbons	C18H38	21164-95-4	25547.7	21212.1	23047.9	23635.2	22879.1	25885.7	25936.2	34519.1	38953.7	35679.3	34310.8	43471.6	34891.6	40266.8	37149.3	37695.3	34648.1	36781.3	10137.8	14178.5	10819	13038.7	11176.4	13903.1
XMW1097*076	Hexanoic acid, 3-hexenyl ester	Ester	C12H22O2	84434-19-5	17706.6	15652.4	31068.7	15397	17031.3	15442.6	66054.1	66056.9	62740.1	64902.2	63074.7	49267.6	79292	79693.9	77948.6	73638.3	71662	67956.1	54655.8	51135.1	52348.1	54689.5	56309.1	53444.6
KMW0528	Hexanoic acid, 3-hexenyl ester, (Z)-	Ester	C12H22O2	31501-11-8	187824	172649	183162	172340	181325	176822	522366	512402	496620	511365	490136	391218	617459	618675	605186	561800	560651	531787	112947	119839	118882	110547	113173	127295
XMW1089	Hexanoic acid, cyclopentyl ester	Ester	C11H20O2	5413-59-2	8669.75	6306.62	9356.75	6954.07	8690.18	6784.07	34248.4	33218.1	32089.9	32602.5	31877.8	32929.1	32956	33420.5	32925.4	32626.5	31135.9	32031.7	2528.25	1992.44	2512.35	2520.28	2829.69	2660.1
KMW0144	Hexanoic acid, methyl ester	Ester	C7H14O2	106-70-7	14430.8	14768.6	16644.1	15863.4	15935.8	13162.4	44749.9	46698.9	42895.5	45136.4	45969.3	40714.1	45465.1	48179.2	46825.6	45059.9	41484.2	45689.5	4996.92	3778.92	3936.94	4172.93	4701.39	4742.91
D184	Hydroquinone	Phenol	C6H6O2	123-31-9	2774.06	2835.01	3311.5	3069.66	3108.67	2767.84	9843.38	8493.47	9677.33	9950.87	8168.02	8917.32	9995.08	10515.2	10012.8	9545.98	9287.28	9770.58	1047.61	1015.85	993.996	823.875	1002.56	726.13
KMW0533	Indole, 3-methyl-	Heterocyclic compound	C9H9N	83-34-1	33829.5	30634	34286.1	30395.6	32312.6	30888.2	93514.2	93768.9	87865.5	91217.1	87892.9	65683.8	109622	110565	107876	100788	101342	94637.8	61986.5	49438	60330.7	61424.5	62542.6	48867.2
NMW0275*103	Isoelemicin	Aromatics	C12H16O3	487-12-7	6364.52	6510.16	7050.79	7721.13	6363.85	5910.98	16568.1	18151.7	17113.7	17491.2	17306.7	17967.2	17459.6	18818.4	17698.2	17732.2	16996.8	16401	5629.77	4243.15	4821.74	4746.29	4647.89	4500.15
XMW1002	Isolongifolene, 4,5,9,10-dehydro-	Hydrocarbons	C15H20	156747-45-4	46362.1	42168.7	47999.2	41787.9	44129.5	41531.4	87440.3	85551	85248.3	84421.4	84861.7	65906.6	91687.5	93094.7	91270.4	86552.6	87378.5	80094.9	27047.7	25322.7	24900	26501.9	25547.2	28060.6
XMW0972	Khusimyl methyl ether	Hydrocarbons	C16H26O	300349-20-6	54031.8	54269.7	49204.2	75410.7	49452.9	55734.4	149551	167253	142244	162560	172691	358208	255794	307021	296589	272751	204731	294972	31712.6	27532.1	22501.4	29559.4	21909.6	30827.4
KMW0453	Linalyl acetate	Terpenoids	C12H20O2	115-95-7	313840	356367	329012	322545	289474	299172	668748	629078	623986	642188	628777	631508	809198	798375	798482	796928	747660	792116	98831.3	107280	117427	116023	115149	111575
XMW1094	Megastigma-4,6(Z),8(E)-triene	Hydrocarbons	C13H20	51468-85-0	99091.2	88778.1	100537	88344	93808.9	90752.3	292622	286724	277606	285192	271945	211785	348537	344881	340128	315210	317086	295603	62269	58557.9	57058.5	63900	64254.3	63136
XMW0301	Mesitylene	Aromatics	C9H12	108-67-8	121499	126737	136521	112233	128475	111664	404011	383246	390716	462609	378372	384421	408928	442367	435292	359134	353154	419137	83430.3	57927.3	77973.9	76350.6	81641.2	76809.3
XMW1081	Methanesulfonylacetonitrile	Others	C3H5NO2S	2274-42-2	272416	272416	272416	272416	272416	272416	1.42034e+06	3.67659e+06	3.69491e+06	1.36208e+06	3.40646e+06	3.53753e+06	3.08947e+06	3.12777e+06	3.0327e+06	2.97025e+06	2.85738e+06	2.92525e+06	272416	272416	272416	272416	272416	272416
KMW0544	Methyleugenol	Phenol	C11H14O2	93-15-2	12582.3	12415.2	13775.5	10939.4	12521.1	11198.4	31709.7	39512.9	42984.8	38740.6	36710.3	31347	47962	45451.6	43469.6	46903.1	36406.2	36266.8	2187.87	2187.87	2187.87	2187.87	2187.87	2187.87
D329*114	Myroxide	Terpenoids	C10H16O	28977-57-3	142226	150027	136924	132442	156869	138131	17942.7	1.08274e+06	17942.7	875873	980810	819490	1.18152e+06	1.2076e+06	1.07969e+06	1.12475e+06	1.14263e+06	1.03949e+06	89713.4	92711.4	106428	99489.5	97624.3	89804.7
XMW0291	N-Acetylisoxazolidine	Heterocyclic compound	C5H9NO2	115615-36-6	89893.8	93843.6	105534	97959	98888.2	99222.6	311297	268877	295092	311667	262236	283264	312953	332747	321092	310042	288972	315011	29189.3	27463.7	30987.3	30977.6	29612.8	26603.9
KMW0556	Naphthalene, decahydro-4a-methyl-1-methylene-7-(1-methylethenyl)-, [4aR-(4a.alpha.,7.alpha.,8a.beta.)]-	Terpenoids	C15H24	17066-67-0	743265	676411	729072	382521	405752	395804	782078	817618	768820	780286	736719	637759	988485	977295	953499	926074	928499	914494	381643	383977	359189	378777	383032	393988
KMW0461	Nonanoic Acid	Acid	C9H18O2	112-05-0	6024.45	6217.47	6693.75	5953.71	5925.45	6179.72	12839.6	12653.8	12519.3	11802.2	10932.4	11393.1	15585.1	14365.7	14621.9	14851.3	13379.4	14396.5	2417.74	1993.63	1646.23	1843.63	1672.07	4549.49
XMW1345	Octanoic acid, 3-methylbutyl ester	Ester	C13H26O2	2035-99-6	422623	367683	374501	374170	395810	381416	824986	772619	788298	750404	786743	519602	1.05874e+06	1.06775e+06	1.06627e+06	976497	971016	939552	259511	248474	250113	256696	269076	264367
XMW0640	Panaxene	Terpenoids	C15H24	871660-95-6	322997	324890	357239	316667	325160	304361	1.23914e+06	1.23324e+06	1.2232e+06	1.15155e+06	1.12139e+06	1.12893e+06	1.1499e+06	1.1406e+06	1.13517e+06	1.12836e+06	1.10246e+06	1.12063e+06	99478.7	95123.3	97516.1	94945.3	105730	96898.1
XMW2429*059	Patchoulene	Terpenoids	C15H24	1405-16-9	972485	975414	2.65884e+06	2.37242e+06	2.44946e+06	975651	2.80032e+06	2.6258e+06	5.69678e+06	2.5209e+06	5.76847e+06	2.89786e+06	5.46935e+06	5.52072e+06	5.41664e+06	5.01852e+06	5.00011e+06	4.75017e+06	1.25867e+06	1.1961e+06	1.20308e+06	1.25027e+06	1.30663e+06	1.28566e+06
D455	Pentanoic acid, 2-hydroxy-4-methyl-, methyl ester	Ester	C7H14O3	40348-72-9	3035.27	3127.35	3408.23	3086.11	3129.1	3377.02	13075.6	11750.9	11943.2	12816.4	8805.59	9266.85	11618.1	11518.6	11512.1	11340.4	10774.4	11183.2	1650.38	1340.3	1550.91	1595.71	1688.23	1489.43
D447	Pentanoic acid, 2-methyl-, ethyl ester	Ester	C8H16O2	39255-32-8	30065.1	30950.8	35440.8	32823.5	33319	28003.8	101539	86413.6	96182.3	101021	84786.5	92037.8	101780	106869	104095	100920	94176.9	102287	11277.6	8075.3	9029.12	9124.18	9715.15	10543.1
KMW0164	Pentanoic acid, 4-methyl-, ethyl ester	Ester	C8H16O2	25415-67-2	5428.47	6462.03	6873.02	6403.36	6717.5	6466.97	19779.2	18354.4	18312.9	19235.1	17104.1	19310.5	18895.3	18766.2	18816.5	18254.6	17932.1	17445.5	4192.58	3523.19	3638.55	3588.69	4245.71	3526.84
NMW0201	Phenmetrazine	Heterocyclic compound	C11H15NO	134-49-6	402981	370433	413737	378300	385847	377890	606708	639738	578373	614704	584446	463944	661743	671293	554109	611345	600825	580745	244205	260350	246961	260585	267437	272572
KMW0732	Phenol, 2,6-dimethoxy-4-(2-propenyl)-	Phenol	C11H14O3	6627-88-9	877.649	1490.69	1539.6	1645.55	1499.87	1364.28	14868.8	15190.4	14325.1	15439.7	15164.2	25265.3	20756.6	20987.2	20724.7	20305.7	15227.9	20056.1	363.758	305.481	309.155	418.183	384.917	336.052
KMW0710	Phenol, 2-methoxy-4-(1-propenyl)-	Phenol	C10H12O2	97-54-1	3667.82	4521.16	3795.15	4648.19	3678.43	3749.52	6014.17	421.198	5748.7	421.198	5692.44	5698.97	4828.64	5094.34	4907.12	4516.17	4466.49	4265.12	2198.03	2141.43	2105.99	2329.45	2353.56	2127.98
NMW0128	Phenol, 4-(1-methylpropyl)-	Phenol	C10H14O	99-71-8	86284.7	84512	91480.6	82415.7	83833	77036.6	263829	258234	254456	266062	285115	297678	303877	299639	389751	389114	261559	292105	27294.7	27040.8	27662.5	26119.1	28740.6	27233.2
KMW0433	Phenol, 4-(2-propenyl)-	Aromatics	C9H10O	501-92-8	285153	286786	312577	272176	274546	259505	1.12859e+06	1.07912e+06	1.09954e+06	1.03668e+06	987461	1.01806e+06	1.35591e+06	1.31267e+06	1.33871e+06	1.32071e+06	1.21884e+06	1.28077e+06	60775.9	59676.8	62408.9	59342.4	63871.7	59266.2
NMW0105	Phenol, 4-propyl-	Phenol	C9H12O	645-56-7	328513	355911	383852	348958	339016	321946	608035	732750	557036	741026	728387	739943	736983	893131	724614	721407	828480	723492	151459	138329	151250	153386	174046	146284
KMW0284	Phenylethyl Alcohol	Alcohol	C8H10O	60-12-8	759960	732875	765492	637047	733311	663623	3.99174e+06	3.57374e+06	3.97815e+06	3.65868e+06	3.69931e+06	2.60478e+06	4.15859e+06	4.29832e+06	3.82637e+06	3.92825e+06	4.26184e+06	3.5403e+06	270835	279857	290438	281707	285755	295339
NMW0110	Picolinamide	Heterocyclic compound	C6H6N2O	1452-77-3	228866	280974	310127	284650	277708	263775	573251	563620	432825	564019	560968	549986	666841	671493	656412	658191	623450	644512	127180	113634	126510	128223	145889	121497
XMW1207	Propanedioic acid, amino-, diethyl ester	Ester	C7H13NO4	6829-40-9	2758.25	2523.35	2722.37	2439.9	2700.8	2587.61	14465	14389.7	14746.5	13804.5	13087	13301.2	17112	17187.1	16845.3	16451.1	15836.3	15630.2	1679.56	1665.47	1787.83	1739.09	1906.99	1910.2
NMW0054	Propanoic acid, 3-(methylthio)-	Sulfur compounds	C4H8O2S	646-01-5	34011.3	34011.3	34011.3	34011.3	34011.3	34011.3	284339	263256	278106	270293	248293	240335	343688	340553	335233	337955	319806	328068	34011.3	34011.3	34011.3	34011.3	34011.3	34011.3
KMW0132	Pyrazine, 2,3-dimethyl-	Heterocyclic compound	C6H8N2	5910-89-4	172993	177794	198654	184299	187108	189760	580319	498123	550955	578650	481490	523540	579100	616624	594971	572073	534020	579427	54758.5	51771	57310.4	57882.4	61261.8	50206.8
KMW0268*022	Pyrazine, 2-ethyl-3,5-dimethyl-	Heterocyclic compound	C8H12N2	13925-07-0	1.24229e+06	1.24229e+06	1.24229e+06	1.24229e+06	1.24229e+06	1.24229e+06	1.06514e+07	1.01702e+07	1.01355e+07	1.02393e+07	9.60262e+06	9.57635e+06	6.21147e+06	1.05845e+07	1.18732e+07	1.18375e+07	1.20429e+07	1.16588e+07	1.24229e+06	1.24229e+06	1.24229e+06	1.24229e+06	1.24229e+06	1.24229e+06
KMW0363	Pyrazine, 2-methoxy-3-(1-methylpropyl)-	Heterocyclic compound	C9H14N2O	24168-70-5	106063	167796	178137	158541	166594	106035	466619	558633	450606	441027	493446	521219	553714	567792	546831	550516	479631	527183	116377	115141	120419	123283	122299	115857
D321*125	Pyrazine, 2-methoxy-3-methyl-	Heterocyclic compound	C6H8N2O	2847-30-5	12846.5	11380.1	12014.8	10799.1	10768.7	12025.1	21426.8	19065.7	22497.7	19987.3	17531.1	16362.2	19032.6	19777.6	18432.6	19140.9	18761.3	18524.1	7748.3	8493.94	8797.7	8656.71	8036.21	6866.23
D324*125	Pyrazine, 2-methoxy-6-methyl-	Heterocyclic compound	C6H8N2O	2882-21-5	12846.5	11380.1	12014.8	10799.1	10768.7	12025.1	21426.8	19065.7	22497.7	19987.3	17531.1	16362.2	19032.6	19777.6	18432.6	19140.9	18761.3	18524.1	7748.3	8493.94	8797.7	8656.71	8036.21	6866.23
KMW0264*022	Pyrazine, 3-ethyl-2,5-dimethyl-	Heterocyclic compound	C8H12N2	13360-65-1	1.24229e+06	1.24229e+06	1.24229e+06	1.24229e+06	1.24229e+06	1.24229e+06	1.06514e+07	1.01702e+07	1.01355e+07	1.02393e+07	9.60262e+06	9.57635e+06	6.21147e+06	1.05845e+07	1.18732e+07	1.18375e+07	1.20429e+07	1.16588e+07	1.24229e+06	1.24229e+06	1.24229e+06	1.24229e+06	1.24229e+06	1.24229e+06
XMW0028	Pyridine, 2,3,4,5-tetrahydro-6-propyl-	Heterocyclic compound	C8H15N	1604-01-9	9283.53	10053.4	8680.33	9719.67	9033.3	9540.81	22218	22129.5	23124.4	20916.4	18564.5	15024.7	21343.6	20889.7	20179.5	21407.8	17830.4	20473.4	6450.87	4909.3	6961.04	5375.98	7329.18	6249.61
NMW0099	Quinoline	Heterocyclic compound	C9H7N	91-22-5	1892.96	1856.52	1673.67	1787	1724.05	1738.87	9212.21	9357.34	8101.65	8121.32	7451.39	7166.58	10447.5	10507.3	9540.97	10493.4	8648.21	9937.83	1074.09	1016.76	1109.42	990.983	1149.47	1183.35
WMW0148	Spiro[4.5]dec-7-ene, 1,8-dimethyl-4-(1-methylethenyl)-, [1S-(1.alpha.,4.beta.,5.alpha.)]-	Terpenoids	C15H24	24048-44-0	2.44093e+06	2.23117e+06	2.45542e+06	2.26637e+06	2.32348e+06	2.26793e+06	5.44076e+06	5.48492e+06	5.17462e+06	5.36428e+06	5.20296e+06	4.33261e+06	5.25737e+06	5.2753e+06	5.21137e+06	4.62067e+06	4.61615e+06	4.45712e+06	1.17616e+06	1.04685e+06	1.04897e+06	1.18227e+06	1.13046e+06	1.20015e+06
GMW0369	Spiro[5.5]undec-2-ene, 3,7,7-trimethyl-11-methylene-, (-)-	Terpenoids	C15H24	18431-82-8	2.78652e+06	2.5232e+06	2.90458e+06	2.56898e+06	2.65318e+06	2.58774e+06	4.60557e+06	4.57196e+06	4.27528e+06	4.57707e+06	4.31549e+06	3.69707e+06	5.88912e+06	5.87717e+06	5.74301e+06	5.31699e+06	5.30453e+06	5.14298e+06	1.2212e+06	1.13704e+06	1.16093e+06	1.21933e+06	1.25651e+06	1.223e+06
XMW0419	Tetradecane, 2-methyl-	Hydrocarbons	C15H32	1560-95-8	442147	378684	448238	412267	423924	416039	583205	767695	560221	735685	564992	448116	651100	659133	552662	599918	696065	679127	270042	247278	265261	250833	286018	263271
XMW1158	Tricyclo[3.3.1.1(3,7)]decane, 2-nitro-	Nitrogen compounds	C10H15NO2	54564-31-7	4922.83	3425.22	3587.93	2588.63	357.99	3435.79	20942	357.99	17781.5	14623.2	357.99	357.99	14913.5	15907.2	12694	15296.2	13283.2	15413.6	2245.8	2091.51	1803.11	1789.95	1926.44	2934.84
XMW0822*056	Tricyclo[4.4.0.02,7]decane, 1-methyl-3-methylene-8-(1-methylethyl)-, stereoisomer	Terpenoids	C15H24	18252-44-3	2.76964e+07	2.66845e+07	2.83173e+07	2.65396e+07	2.69503e+07	2.64674e+07	2.36445e+07	5.50193e+07	5.23544e+07	5.37667e+07	5.2558e+07	4.69835e+07	4.70193e+07	4.78981e+07	4.66002e+07	4.44563e+07	4.42387e+07	4.24453e+07	4.72889e+06	4.72889e+06	4.72889e+06	4.72889e+06	4.72889e+06	4.72889e+06
WMW0004*054	Ylangene	Terpenoids	C15H24	14912-44-8	56344.2	51586	54526.4	43434.3	44604.4	40735.5	89164	78746.4	82492.1	80616.3	70781.5	83892.3	86160	85837.9	84561.9	78846.3	74704.8	72944.3	22280.3	20424.2	23730.7	23058.3	15629.5	21142.7
XMW1470	[1,1'-Bicyclopentyl]-2-one	Ketone	C10H16O	4884-24-6	257669	309231	336734	317674	306609	294429	372961	351879	252199	355684	461540	345653	508357	514156	384512	386484	478495	373283	145771	136460	145358	156116	174636	147023
XMW2700*146	[1S-(1.alpha.,2.alpha.,3a.beta.,4.alpha.,5.alpha.,7a.beta.,8S*)]-octahydro-1,7a-dimethyl-5-(1-methylethyl)-1,2,4-Metheno-1H-indene	Terpenoids	C15H24	22469-52-9	292180	263468	295507	264390	274322	259994	1.11165e+06	1.11795e+06	1.0553e+06	1.09402e+06	1.05443e+06	777823	1.33558e+06	1.32925e+06	1.32495e+06	1.21613e+06	1.22026e+06	1.12219e+06	288523	282260	297566	284891	287319	304397
WMW0081*013	cis-2-(2-Pentenyl)furan	Heterocyclic compound	C9H12O	70424-13-4	67828.7	69476.3	73118	72147.7	67150.1	69420.7	82289.8	69022.1	76016.6	77669.2	71525.8	107404	101544	104309	97452.8	96772.2	84969	99628.4	20148.1	20735.4	21136.7	19901.7	22747.1	30215.4
XMW0461*076	cis-3-Hexenyl cis-3-hexenoate	Ester	C12H20O2	61444-38-0	17706.6	15652.4	31068.7	15397	17031.3	15442.6	66054.1	66056.9	62740.1	64902.2	63074.7	49267.6	79292	79693.9	77948.6	73638.3	71662	67956.1	54655.8	51135.1	52348.1	54689.5	56309.1	53444.6
XMW0720	cis-p-Mentha-2,8-dien-1-ol	Terpenoids	C10H16O	3886-78-0	1.14256e+06	1.10803e+06	1.15757e+06	971791	1.08941e+06	1.01953e+06	7.1399e+06	6.80757e+06	7.20941e+06	6.54666e+06	6.38618e+06	4.2201e+06	7.03392e+06	7.12418e+06	5.6726e+06	6.70429e+06	5.98724e+06	5.99486e+06	422556	411327	429537	414909	428950	428713
D163	dl-Camphoroquinone	Terpenoids	C10H14O2	10373-78-1	362028	301310	394201	367153	363136	352641	1.36345e+06	1.33236e+06	1.3099e+06	1.31776e+06	1.28469e+06	1.30846e+06	1.33559e+06	1.33293e+06	1.31926e+06	1.30044e+06	1.25472e+06	1.29557e+06	86712.7	84549.4	86999.6	87654.4	93422.8	87726.7
XMW0382*054	isoledene	Terpenoids	C15H24	95910-36-4	56344.2	51586	54526.4	43434.3	44604.4	40735.5	89164	78746.4	82492.1	80616.3	70781.5	83892.3	86160	85837.9	84561.9	78846.3	74704.8	72944.3	22280.3	20424.2	23730.7	23058.3	15629.5	21142.7
XMW0063	p-Isopropoxyaniline	Amine	C9H13NO	7664-66-6	4.91036e+06	4.50723e+06	5.34474e+06	4.96249e+06	4.89779e+06	4.78152e+06	1.82528e+07	1.77674e+07	1.7594e+07	1.784e+07	1.75725e+07	1.77179e+07	1.81621e+07	1.80484e+07	1.77929e+07	1.75334e+07	1.71611e+07	1.76537e+07	1.27988e+06	1.17716e+06	1.18684e+06	1.25135e+06	1.34641e+06	1.25829e+06
XMW0719	p-Mentha-1,5,8-triene	Terpenoids	C10H14	21195-59-5	920406	883564	958362	823769	934045	907571	6.6505e+06	6.12185e+06	6.62611e+06	6.00822e+06	4.9177e+06	3.39547e+06	5.54649e+06	5.76548e+06	5.19396e+06	5.33326e+06	5.89579e+06	4.81953e+06	439163	425535	444725	383169	322694	449686
NMW0246*125	trans-4-MethoxycinnamAldehyde	Aldehyde	C10H10O2	24680-50-0	12846.5	11380.1	12014.8	10799.1	10768.7	12025.1	21426.8	19065.7	22497.7	19987.3	17531.1	16362.2	19032.6	19777.6	18432.6	19140.9	18761.3	18524.1	7748.3	8493.94	8797.7	8656.71	8036.21	6866.23
WMW0016	(-)-Bornyl acetate	Terpenoids	C12H20O2	5655-61-8	5.44369e+07	5.55275e+07	5.72181e+07	5.43962e+07	5.46607e+07	5.28027e+07	1.82714e+08	1.80383e+08	1.80734e+08	1.71695e+08	1.6633e+08	1.67876e+08	1.41865e+08	1.41361e+08	1.39521e+08	1.38898e+08	1.33837e+08	1.34561e+08	4.18616e+07	4.11745e+07	4.19369e+07	4.19659e+07	4.29503e+07	4.17446e+07
D408	(1Alpha,3beta,4beta)-p-menthane-3,8-diol	Terpenoids	C10H20O2	3564-95-2	52291	50402.1	56568.2	46392.6	52595.6	48433.4	153544	155650	148745	146640	152060	143226	123313	126857	125038	124941	121025	120583	2993.35	15856.5	14966.7	2993.35	2993.35	17405
KMW0418	(1R)-(-)-Myrtenal	Aldehyde	C10H14O	18486-69-6	55385.8	55385.8	55385.8	55385.8	55385.8	55385.8	797011	759735	806665	721183	713191	402432	785512	795983	610756	636210	676053	570420	55385.8	55385.8	55385.8	55385.8	55385.8	55385.8
XMW1180	(1R,1aR,2aS,5R,6R,6aS,7aS)-1,6,6a-trimethyldecahydro-1,2a-methanocyclopropa[b]naphthalen-5-ol	Terpenoids	C15H24O	860769-47-7	1.01647e+06	1.04792e+06	1.17988e+06	203295	1.02912e+06	203295	2.45287e+06	2.44525e+06	2.35418e+06	2.40694e+06	2.36054e+06	2.05183e+06	2.12039e+06	2.13097e+06	2.08417e+06	2.00975e+06	1.98422e+06	1.86834e+06	203295	203295	203295	203295	203295	203295
XMW0980*143	(1R,3aR,4aR,8aR)-1,4,4,6-Tetramethyl-1,2,3,3a,4,4a,7,8-octahydrocyclopenta[1,4]cyclobuta[1,2]benzene	Terpenoids	C15H24	94482-89-0	199844	178339	218125	184383	195299	183185	411845	407125	401765	386677	391372	347803	311516	310797	303529	296163	297116	289194	129621	121590	122574	130844	98429.2	136216
XMW0033*143	(1R,3aS,4aS,8aS)-1,4,4,6-Tetramethyl-1,2,3,3a,4,4a,7,8-octahydrocyclopenta[1,4]cyclobuta[1,2]benzene	Terpenoids	C15H24	94535-52-1	199844	178339	218125	184383	195299	183185	411845	407125	401765	386677	391372	347803	311516	310797	303529	296163	297116	289194	129621	121590	122574	130844	98429.2	136216
XMW0549	(1S,4aR,7R)-1,4a-Dimethyl-7-(prop-1-en-2-yl)-1,2,3,4,4a,5,6,7-octahydronaphthalene	Terpenoids	C15H24	52026-55-8	194259	175672	196170	184393	185834	182884	261628	241276	259145	247544	247184	275962	227335	228665	229288	237137	245095	235315	107333	103625	103865	106102	107343	112784
XMW0965*143	(1S,5S)-2-Methyl-5-((R)-6-methylhept-5-en-2-yl)bicyclo[3.1.0]hex-2-ene	Hydrocarbons	C15H24	159407-35-9	199844	178339	218125	184383	195299	183185	411845	407125	401765	386677	391372	347803	311516	310797	303529	296163	297116	289194	129621	121590	122574	130844	98429.2	136216
XMW0817	(1S,5S,6R)-6-Methyl-2-methylene-6-(4-methylpent-3-en-1-yl)bicyclo[3.1.1]heptane	Terpenoids	C15H24	15438-94-5	515596	489344	549339	517126	507376	499681	1.02697e+06	1.05927e+06	947536	1.03581e+06	999848	852500	851404	854578	840619	752396	744164	822792	265387	257928	261852	268614	342629	260675
NMW0249	(3E,7E)-4,8,12-Trimethyltrideca-1,3,7,11-tetraene	Terpenoids	C16H26	62235-06-7	360588	70906.8	206133	65272.1	293955	297724	719108	739869	791606	660098	669379	486237	375782	376989	385843	388990	447823	386282	162298	174444	146473	158270	142613	242048
XMW0546	(5R,8aR)-5-Propyloctahydroindolizine	Heterocyclic compound	C11H21N	120057-35-4	160494	161217	162094	159060	158031	155610	579621	566393	563171	544009	521633	531384	442375	447185	435784	439264	412172	420495	122513	119984	123361	123370	125712	123024
WMW0065	(6Z)-Nonen-1-ol	Alcohol	C9H18O	35854-86-5	213528	186860	214497	170150	209307	162398	633460	617578	601302	575546	509478	404302	494216	479725	449219	470916	483246	451938	162149	164051	155902	162619	160272	177852
XMW1072	(E)-2,6-Dimethylocta-5,7-dien-2-ol	Alcohol	C10H18O	7643-60-9	66065.5	93090.2	98437.3	83618.6	95425	84527.6	295278	374017	297446	269034	237592	225764	248610	247421	233471	245073	244920	232016	55347.1	53523.8	84649.6	89735.1	71666.4	53478.1
KMW0157*012	(E)-2-Heptenal	Aldehyde	C7H12O	18829-55-5	41607.1	42994	48282.1	46237.3	44604.5	45759.1	218796	195232	208427	221322	189728	214570	179447	188052	181074	177530	167012	178846	19334	24150.9	21381.4	26990.6	29104.4	23093.6
XMW0750	(E)-Tetradec-2-enal	Aldehyde	C14H26O	51534-36-2	21167.3	12286	13108.9	13148.8	13426.2	14355	25994	25972.4	32970.5	28226.7	22857.8	61570.6	14460.6	44600.3	4004.24	39766	15520.9	39842.8	6924	8558.44	6482.53	7013.65	5992.71	11228.8
D344	(E,E)-2,4-Undecadienal	Aldehyde	C11H18O	30361-29-6	1.52209e+07	1.44963e+07	1.57492e+07	1.46242e+07	1.49572e+07	1.45434e+07	3.07346e+07	3.05849e+07	2.90742e+07	2.98569e+07	2.93943e+07	2.5748e+07	2.63613e+07	2.63379e+07	2.59195e+07	2.44728e+07	2.42353e+07	2.36179e+07	2.89927e+06	2.89927e+06	2.89927e+06	2.89927e+06	2.89927e+06	2.89927e+06
XMW0764*131	(S)-(-)-(4-Isopropenyl-1-cyclohexenyl)methanol	Terpenoids	C10H16O	18457-55-1	1.26371e+06	1.29151e+06	1.34523e+06	1.2625e+06	1.274e+06	1.22206e+06	4.01731e+06	3.93926e+06	3.93963e+06	3.80979e+06	3.72556e+06	3.7366e+06	3.19493e+06	3.1828e+06	3.13191e+06	3.1018e+06	2.99594e+06	3.02377e+06	890765	886861	900574	888045	908458	884597
KMW0156*012	(Z)-2-Heptenal	Aldehyde	C7H12O	57266-86-1	41607.1	42994	48282.1	46237.3	44604.5	45759.1	218796	195232	208427	221322	189728	214570	179447	188052	181074	177530	167012	178846	19334	24150.9	21381.4	26990.6	29104.4	23093.6
KMW0704	.alpha.-Calacorene	Terpenoids	C15H20	21391-99-1	444443	444443	444443	444443	444443	444443	4.00934e+06	4.24188e+06	4.08262e+06	4.00092e+06	3.66147e+06	3.5278e+06	2.5859e+06	2.50563e+06	2.50693e+06	2.22222e+06	2.34277e+06	2.3726e+06	444443	444443	444443	444443	444443	444443
KMW0613	.alpha.-Farnesene	Terpenoids	C15H24	502-61-4	2.92604e+06	3.17402e+06	2.77611e+06	3.16041e+06	2.97457e+06	3.04887e+06	1.21241e+07	1.19702e+07	1.17738e+07	1.18001e+07	1.15479e+07	1.01347e+07	1.08356e+07	1.09157e+07	1.07642e+07	9.925e+06	9.89644e+06	9.62158e+06	2.5375e+06	2.60388e+06	2.58761e+06	2.56074e+06	2.54189e+06	2.54127e+06
XMW0598	.alpha.-Methylstyrene	Aromatics	C9H10	98-83-9	21865.7	22373.5	24717.6	20050.3	23507.7	19599.1	81736.6	75157.5	75923.8	81771.6	72273.9	75053.7	75642.5	77108	75959.3	74127.7	68509.5	73071.5	15167.4	14000.7	15299.6	11296.3	11476.6	13737.9
KMW0484*144	.alpha.-Terpineol	Terpenoids	C10H18O	98-55-5	1703.05	13770.4	14944.1	13664.1	14298.6	13969	58545.6	51102.4	57592.4	55643.2	56459.3	66194.3	44221.4	45792.8	46783.6	44800.9	38440.8	43077.7	10392.5	8705.19	9197.85	9442.12	8733.26	8515.24
KMW0516*081	.alpha.-Terpinyl acetate	Ester	C12H20O2	80-26-2	272097	265176	300561	265074	279326	261296	1.16431e+06	1.1857e+06	1.13474e+06	1.10861e+06	1.1313e+06	1.08699e+06	949446	958735	950508	941778	912827	915781	85474.1	83862.8	82218.8	82006.5	81355.7	86906.2
GMW0078	.beta.-Bisabolene	Terpenoids	C15H24	495-61-4	1.79719e+07	1.66312e+07	1.75163e+07	1.67846e+07	1.71825e+07	1.70474e+07	6.18511e+07	6.17101e+07	5.97693e+07	6.09949e+07	5.82354e+07	5.08184e+07	5.52978e+07	5.60137e+07	5.49813e+07	5.0933e+07	5.08712e+07	4.91092e+07	1.33429e+07	1.29546e+07	1.29257e+07	1.31664e+07	1.35293e+07	1.36349e+07
KMW0199	.beta.-Myrcene	Terpenoids	C10H16	123-35-3	8.63627e+06	9.22081e+06	1.0144e+07	9.69885e+06	9.3938e+06	9.46725e+06	4.21097e+07	3.77291e+07	3.8996e+07	4.16055e+07	3.60088e+07	3.70621e+07	3.61457e+07	3.68471e+07	3.55899e+07	3.47852e+07	3.35128e+07	3.46269e+07	4.93402e+06	5.21627e+06	5.71504e+06	5.67499e+06	6.14544e+06	5.0788e+06
WMW0215*018	.beta.-Ocimene	Terpenoids	C10H16	13877-91-3	1.82301e+07	1.86544e+07	1.87073e+07	1.88024e+07	1.8343e+07	1.85871e+07	5.81478e+07	5.0061e+07	5.55205e+07	5.6131e+07	4.792e+07	5.0589e+07	4.6066e+07	4.54519e+07	4.61508e+07	4.51515e+07	4.38436e+07	4.41855e+07	1.06358e+07	1.03655e+07	1.1026e+07	1.09161e+07	1.14962e+07	1.0169e+07
D154	.beta.-Phenylethyl butyrate	Ester	C12H16O2	103-52-6	47337.6	42830.3	47560.5	45955.6	44605.2	43594.2	62035.7	57329	62928.4	59243.5	59038.8	66696.2	54872.4	55089.6	55456.7	56985.4	58892.2	57312.4	25526.6	24653.1	24976.3	25364.2	26045.1	26967.9
KMW0193*119	.beta.-Pinene	Terpenoids	C10H16	127-91-3	3.85023e+07	4.05305e+07	4.34586e+07	4.16926e+07	4.12822e+07	4.10114e+07	1.29366e+08	1.21168e+08	1.23419e+08	1.27786e+08	1.1704e+08	1.21086e+08	1.17249e+08	1.20313e+08	1.17995e+08	1.1438e+08	1.1055e+08	1.13821e+08	2.51531e+07	2.50701e+07	2.72624e+07	2.70723e+07	2.89334e+07	2.41786e+07
KMW0553	.gamma.-Elemene	Terpenoids	C15H24	29873-99-2	1.84603e+07	1.73634e+07	1.90071e+07	1.74657e+07	1.80582e+07	1.76299e+07	3.62435e+07	3.59449e+07	3.48768e+07	3.52824e+07	3.45608e+07	3.0362e+07	3.09688e+07	3.07889e+07	3.0364e+07	2.94035e+07	2.89953e+07	2.75489e+07	9.64844e+06	9.01171e+06	9.3396e+06	9.65793e+06	9.98714e+06	9.92776e+06
KMW0259	.gamma.-Terpinene	Terpenoids	C10H16	99-85-4	1.51905e+07	1.51905e+07	1.51905e+07	1.51905e+07	1.51905e+07	1.51905e+07	1.50874e+08	1.42543e+08	1.41608e+08	1.47262e+08	1.36683e+08	1.36672e+08	1.20905e+08	1.20171e+08	1.19128e+08	1.17206e+08	1.09301e+08	1.14571e+08	1.51905e+07	1.51905e+07	1.51905e+07	1.51905e+07	1.51905e+07	1.51905e+07
XMW1026	1(2H)-Naphthalenone, 3,4,4a,5,6,7-hexahydro-4a,5-dimethyl-3-(1-methylethenyl)-, [3S-(3.alpha.,4a.alpha.,5.alpha.)]-	Terpenoids	C15H22O	562-23-2	149.217	149.217	149.217	149.217	149.217	149.217	9594.44	11496.5	10026.8	9829.53	9491.52	8312.33	6321.25	6504.91	5779.02	6743.34	6739.13	5607.85	149.217	149.217	746.087	982.65	149.217	1037.58
XMW0262	1,1,7,7a-Tetramethyl-1a,2,6,7,7a,7b-hexahydro-1H-cyclopropa[a]naphthalene	Terpenoids	C15H22	154098-14-3	272031	257484	287628	257073	265134	255092	529043	529905	505196	517631	516417	459897	460148	470923	458916	436081	434400	417567	51018.5	51018.5	51018.5	51018.5	51018.5	51018.5
XMW0444	1,2,4,5-Tetrazin-3-Amine	Heterocyclic compound	C2H3N5	79329-74-1	163997	168391	176189	168350	169373	166555	466733	446833	452496	460494	431167	440898	424800	433332	425090	415958	408735	411285	118122	113242	120902	100345	125239	109156
NMW0223	1,2,4-Benzenetriol	Alcohol	C6H6O3	533-73-3	4756.6	5247.66	3975.37	5023.48	4841.71	5410.37	9943.39	9456.71	9401.39	10325.1	8285.75	9220.15	8283.78	8456.12	8178.48	7221.1	9218.56	9032.37	4320.83	4549.87	4465.07	4558.44	4190.48	4545.2
NMW0119	1,2-Benzenediol, 4-methyl-	Alcohol	C7H8O2	452-86-8	1.21001e+06	1.21364e+06	1.34104e+06	1.20498e+06	1.20066e+06	1.17957e+06	4.3371e+06	4.25185e+06	4.22823e+06	4.08061e+06	3.91031e+06	3.98631e+06	3.30751e+06	3.34204e+06	3.2651e+06	3.25945e+06	3.07972e+06	3.13797e+06	925217	904198	933958	929935	950229	922830
KMW0235*018	1,3,6-Octatriene, 3,7-dimethyl-, (Z)-	Terpenoids	C10H16	3338-55-4	1.82301e+07	1.86544e+07	1.87073e+07	1.88024e+07	1.8343e+07	1.85871e+07	5.81478e+07	5.0061e+07	5.55205e+07	5.6131e+07	4.792e+07	5.0589e+07	4.6066e+07	4.54519e+07	4.61508e+07	4.51515e+07	4.38436e+07	4.41855e+07	1.06358e+07	1.03655e+07	1.1026e+07	1.09161e+07	1.14962e+07	1.0169e+07
XMW0741	1,3-Benzodioxole, 2-acetyl-4-methoxy-2-methyl-	Heterocyclic compound	C11H12O4	91057-65-7	27890.5	21214.8	22681.4	17842.4	21802	22567.6	79422.2	79596.4	94089.7	72088.2	71666.7	50735.5	44492.8	43999.8	43869.1	38822.3	48941	39230.8	16308.1	18399.3	15981	16035	15291.7	20141.4
KMW0223	1,3-Cyclohexadiene, 1-methyl-4-(1-methylethyl)-	Terpenoids	C10H16	99-86-5	4.90744e+06	4.93324e+06	5.37153e+06	5.12917e+06	4.8437e+06	4.68182e+06	1.18291e+07	1.06907e+07	1.10407e+07	1.15696e+07	9.60335e+06	1.11417e+07	7.97441e+06	8.04875e+06	7.73159e+06	7.71495e+06	6.88877e+06	7.76158e+06	1.99121e+06	2.04314e+06	2.08684e+06	2.01292e+06	2.28409e+06	2.00508e+06
KMW0595*084	1,3-Cyclohexadiene, 5-(1,5-dimethyl-4-hexenyl)-2-methyl-, [S-(R*,S*)]-	Terpenoids	C15H24	495-60-3	2.57547e+06	2.68809e+06	2.76263e+06	2.85009e+06	1.95477e+06	1.86577e+06	6.27984e+06	6.38644e+06	5.73411e+06	6.21635e+06	6.13442e+06	5.3659e+06	5.25807e+06	5.30025e+06	5.21862e+06	4.72167e+06	4.576e+06	4.45127e+06	1.44954e+06	1.35987e+06	1.38885e+06	1.42393e+06	1.5212e+06	1.43013e+06
XMW0416	1,3-Cyclohexadiene, 5-butyl-	Hydrocarbons	C10H16	30168-57-1	8.05321e+06	8.33146e+06	8.69596e+06	8.38537e+06	8.23142e+06	8.2077e+06	2.28272e+07	1.32946e+07	2.16993e+07	2.18424e+07	1.19554e+07	1.41114e+07	1.19916e+07	2.17711e+07	1.25506e+07	1.1921e+07	1.25478e+07	1.18057e+07	3.71926e+06	3.2492e+06	3.4815e+06	3.40812e+06	3.55424e+06	3.19232e+06
XMW0772	1,3-Cyclopentanedione, 2-acetyl-4-methyl-	Ketone	C8H10O3	4056-69-3	9.14608e+06	9.35013e+06	9.80138e+06	9.11947e+06	9.19295e+06	8.32077e+06	3.073e+07	3.00409e+07	2.97985e+07	2.90721e+07	2.84967e+07	2.84583e+07	2.43602e+07	2.4381e+07	2.39671e+07	2.37651e+07	2.25799e+07	2.31586e+07	6.68304e+06	6.55968e+06	6.75763e+06	6.69247e+06	6.87235e+06	6.70722e+06
NMW0026	1,4-Dithiane	Amine	C4H8S2	505-29-3	463059	463059	463059	463059	463059	463059	4.64341e+06	4.27777e+06	4.42787e+06	4.50321e+06	4.12233e+06	4.15694e+06	3.65387e+06	3.67129e+06	3.61066e+06	3.56797e+06	3.4816e+06	3.48062e+06	463059	463059	463059	463059	463059	463059
XMW0031	1,4-Methanoazulen-3-ol, decahydro-1,5,5,8a-tetramethyl-, [1S-(1.alpha.,3.beta.,3a.beta.,4.alpha.,8a.beta.)]-	Terpenoids	C15H26O	99481-30-8	31454.6	22293.3	26129.4	21287.9	25909.5	27358.1	58202.7	56071.8	65242.4	51860.8	58114	56329.1	43710.1	40843.6	42700.5	45487.6	51630	47802	16760.3	17949.1	15246.5	14968.9	12910.6	20673.7
KMW0623	1,5-Cyclodecadiene, 1,5-dimethyl-8-(1-methylethylidene)-, (E,E)-	Terpenoids	C15H24	15423-57-1	1.26466e+06	1.26466e+06	1.26466e+06	1.26466e+06	1.26466e+06	1.26466e+06	2.54105e+07	2.24526e+07	2.46075e+07	2.23884e+07	2.34019e+07	2.34527e+07	1.98296e+07	1.91033e+07	1.90115e+07	1.60189e+07	2.23367e+07	6.3233e+06	1.26466e+06	1.26466e+06	1.26466e+06	1.26466e+06	1.26466e+06	1.26466e+06
XMW0634*039	1,5-Cyclohexadiene-1-methanol, 4-(1-methylethyl)-	Terpenoids	C10H16O	19876-45-0	20415.7	22097.9	23620.4	21191.9	23468.2	18674.7	133151	129960	135214	129904	141957	112424	81102.9	86701	79494.2	80113.7	94661.7	74899.4	9954.99	8383.98	9165.5	9384.53	9532.88	10279.3
D264	1,6-Octadiene, 3,7-dimethyl-	Terpenoids	C10H18	2436-90-0	58293.9	61055.4	67124	63215.9	62609.5	62484.1	244733	213768	232485	242750	204553	233210	206086	219225	210011	205034	190814	208956	33233.2	31997.1	36695.7	35925	39093.7	30902.7
D167	1,7,7-Trimethylbicyclo[2.2.1]heptan-2-ol	Terpenoids	C10H18O	10385-78-1	99885.8	106393	113103	87804.7	111482	99624	232929	247890	235643	220630	225336	212984	240863	250064	224925	233033	12009.2	224023	74713.4	64948.3	65192.2	71881.8	60045.9	72374.7
XMW0013	1,7,7-trimethyl-Tricyclo[2.2.1.0(2,6)]heptane	Terpenoids	C10H16	508-32-7	299899	328218	375799	365050	339944	369928	1.89395e+06	1.33124e+06	1.80396e+06	1.88333e+06	1.25368e+06	1.77287e+06	1.31282e+06	1.45429e+06	1.4081e+06	1.35677e+06	1.22371e+06	1.37658e+06	165780	169401	193876	197421	215357	152528
WMW0105	1,7-Nonadiene, 4,8-dimethyl-	Hydrocarbons	C11H20	62108-28-5	508682	528229	713641	729074	718279	516190	3.31991e+06	3.45583e+06	3.35947e+06	3.18989e+06	3.26919e+06	3.02492e+06	3.1973e+06	3.22969e+06	3.1208e+06	3.09044e+06	3.04577e+06	2.99146e+06	756657	735931	787988	782400	817610	738406
XMW0521	1,7-Octadiene, 2-methyl-6-methylene-	Terpenoids	C10H16	1686-30-2	6.90324e+06	7.26221e+06	7.78786e+06	7.43159e+06	7.43352e+06	7.30111e+06	2.30209e+07	2.15902e+07	2.19356e+07	2.28591e+07	2.08752e+07	2.14711e+07	2.09091e+07	2.15383e+07	2.1025e+07	2.03645e+07	1.97238e+07	2.03234e+07	4.47049e+06	4.21968e+06	4.57207e+06	4.54613e+06	4.822e+06	4.09538e+06
XMW0890	1-Hepten-6-one, 2-methyl-	Ketone	C8H14O	10408-15-8	666657	700517	748933	629490	712450	624784	2.13003e+06	2.02024e+06	2.06405e+06	2.08405e+06	1.95914e+06	2.01141e+06	1.89125e+06	1.91171e+06	1.91956e+06	1.86775e+06	1.81685e+06	1.82769e+06	455070	431913	469804	327765	350654	417565
KMW0133	1-Hexanol, 4-methyl-	Alcohol	C7H16O	818-49-5	14838.4	15329	15249.4	14454.8	15757.8	15538.1	63043.1	55534.2	59993.6	62455	53458	59867.8	53637.2	56415.8	53919.2	52261.5	48515.3	53522.9	10700.2	5851.32	8069.65	8564.4	8467.66	5352.08
XMW0358	1-Pentanone, 1-(2-furanyl)-	Heterocyclic compound	C9H12O2	3194-17-0	128555	81326.9	84260.5	72044.9	95193.9	125048	454313	388131	676438	482060	290445	224177	268813	345446	283931	268773	251901	277786	63219.2	58012.3	52656.3	54364.2	62036.5	74468.1
XMW1018	1-PhenylcyclohexylAmine	Amine	C12H17N	2201-24-3	945823	774566	941559	765367	898053	765938	3.38036e+06	3.32246e+06	3.25211e+06	3.32131e+06	3.18972e+06	2.54258e+06	2.53127e+06	2.41953e+06	2.3751e+06	2.55239e+06	2.54752e+06	2.44279e+06	667818	645887	637911	659570	668353	697039
KMW0160	1-Propanol, 3-(methylthio)-	Alcohol	C4H10OS	505-10-2	266355	282161	299793	252754	286619	250482	955237	891971	912164	973337	863567	893538	890252	916496	896433	877463	814873	864784	183416	173109	188686	187653	200869	167219
D266	1-Tridecene	Hydrocarbons	C13H26	2437-56-1	3.16289e+06	3.22784e+06	3.35181e+06	3.14889e+06	3.18967e+06	3.04992e+06	1.03436e+07	1.01863e+07	1.02251e+07	9.82156e+06	9.59328e+06	9.58952e+06	8.22201e+06	8.1778e+06	8.06133e+06	7.98472e+06	7.76059e+06	7.80572e+06	2.26211e+06	2.24773e+06	2.27471e+06	2.24619e+06	2.28623e+06	2.22855e+06
NMW0061	1-methyl-2-nitro-Benzene	Aromatics	C7H7NO2	88-72-2	10436.1	10875.2	10911.8	9239.23	10710.7	8781.78	28658.8	26934.9	25960.6	25374.1	20566.8	14723.1	22619.1	22029.5	19475.2	21133.8	22102.2	20366.2	3786.08	4233.78	3424.79	3483.17	3983.62	4957.08
XMW0294	10-Undecenal	Aldehyde	C11H20O	112-45-8	2.7764e+07	2.7857e+07	3.06953e+07	2.7662e+07	2.749e+07	2.70502e+07	9.88168e+07	9.69357e+07	9.64086e+07	9.3122e+07	8.92196e+07	9.10931e+07	7.56307e+07	7.62992e+07	7.45911e+07	7.45516e+07	7.04039e+07	7.17089e+07	2.12519e+07	2.08376e+07	2.14695e+07	2.13988e+07	2.18464e+07	2.12827e+07
XMW0504*084	1H-Benzocycloheptene, 2,4a,5,6,7,8-hexahydro-3,5,5,9-tetramethyl-, (R)-	Terpenoids	C15H24	1461-03-6	2.57547e+06	2.68809e+06	2.76263e+06	2.85009e+06	1.95477e+06	1.86577e+06	6.27984e+06	6.38644e+06	5.73411e+06	6.21635e+06	6.13442e+06	5.3659e+06	5.25807e+06	5.30025e+06	5.21862e+06	4.72167e+06	4.576e+06	4.45127e+06	1.44954e+06	1.35987e+06	1.38885e+06	1.42393e+06	1.5212e+06	1.43013e+06
XMW0910	1H-Imidazole, 1-acetyl-	Heterocyclic compound	C5H6N2O	2466-76-4	99674.9	106183	116552	109508	108111	108421	485151	427389	462298	482076	412338	466868	407387	431845	416193	405235	377329	411047	66026.8	57456.2	63755.9	64090.1	68133.1	58323.7
NMW0118	1H-Inden-1-one, 2,3-dihydro-	Ketone	C9H8O	83-33-0	75812.9	76471.5	82317.1	74700	74846.5	73302.3	270734	266083	265230	252871	243578	250154	208690	208128	205353	204296	196563	197858	58560.4	57157.4	59405.9	58282.5	59391.6	57817.2
XMW0206	1H-Pyrazolo[3,4-d]pyrimidin-4-amine	Heterocyclic compound	C5H5N5	2380-63-4	210038	159891	166540	150492	174785	182006	542965	555765	591067	514575	505817	394209	342030	344914	348840	333694	373827	330007	121097	146305	126048	129905	118428	164960
XMW0148	1H-Tetrazol-5-amine	Heterocyclic compound	CH3N5	4418-61-5	1835.72	9178.59	11936.2	9384.78	11127.8	10089.4	20225.6	18597	17646.8	19095.5	18068.8	14945	12776	12268.9	12110	15128.7	14262.8	13579.6	1835.72	1835.72	1835.72	1835.72	1835.72	1835.72
XMW0599	2,2,6-Trimethyl-4H-1,3-dioxin-4-one	Heterocyclic compound	C7H10O3	5394-63-8	97297.1	106858	114127	138530	110996	117002	325906	295329	334591	313461	299073	273856	242317	250715	238301	245194	241819	228090	94691.3	80939.9	80934.5	89188.7	72969.1	91364.7
KMW0181	2,3-Dehydro-1,8-cineole	Terpenoids	C10H16O	92760-25-3	1.15883e+06	1.23988e+06	1.36181e+06	1.31817e+06	1.27076e+06	1.2697e+06	5.22707e+06	4.71073e+06	4.78888e+06	5.15876e+06	4.49741e+06	4.664e+06	4.63618e+06	4.70247e+06	4.47204e+06	4.37343e+06	4.16149e+06	4.40108e+06	615416	600988	663779	678158	737023	581905
XMW0691*049	2,4-Decadienal	Hydrocarbons	C10H16O	2363-88-4	566005	565599	618939	555315	565472	530437	2.69145e+06	2.62078e+06	2.61306e+06	2.57617e+06	2.49775e+06	2.5545e+06	2.61719e+06	2.59548e+06	2.59843e+06	2.5737e+06	1.62337e+06	2.53509e+06	178654	209479	212253	177567	195550	178671
KMW0482*049	2,4-Decadienal, (E,E)-	Aldehyde	C10H16O	25152-84-5	566005	565599	618939	555315	565472	530437	2.69145e+06	2.62078e+06	2.61306e+06	2.57617e+06	2.49775e+06	2.5545e+06	2.61719e+06	2.59548e+06	2.59843e+06	2.5737e+06	1.62337e+06	2.53509e+06	178654	209479	212253	177567	195550	178671
XMW1203	2,5-Furandione, dihydro-3-methyl-	Heterocyclic compound	C5H6O3	4100-80-5	184551	186645	202995	192915	189920	183920	709795	671638	693852	692749	630965	649289	572222	576612	562266	539979	526303	541032	142943	137805	141972	145766	152302	138530
XMW1396	2,6-DimethoxyamphetAmine	Amine	C11H17NO2	23690-14-4	187631	26713.7	187202	26713.7	26713.7	26713.7	247833	252828	243928	247576	233130	226987	168593	158233	158698	133569	134922	143340	26713.7	26713.7	26713.7	26713.7	26713.7	26713.7
XMW0902	2,6-Dimethyl-2-trans-6-octadiene	Terpenoids	C10H18	2609-23-6	3.751e+06	4.05401e+06	5.25476e+06	4.37443e+06	4.22085e+06	4.18074e+06	1.86334e+07	1.6836e+07	1.70094e+07	1.84275e+07	1.62641e+07	1.67589e+07	1.63359e+07	1.66706e+07	1.59691e+07	1.56766e+07	1.48787e+07	1.55521e+07	2.34349e+06	2.1553e+06	2.38607e+06	2.44644e+06	2.63894e+06	2.12118e+06
XMW1433	2,6-Heptanedione, 3-acetyl-	Ketone	C9H14O3	29214-57-1	145.334	145.334	145.334	145.334	145.334	145.334	8795.13	10039.2	8835.55	8552.51	8529.67	6568.97	7580.32	6786.62	6989.27	6648.02	2256.57	6280.39	726.668	145.334	756.156	929.434	145.334	145.334
KMW0354	2,6-Nonadien-1-ol	Alcohol	C9H16O	7786-44-9	9450.06	8624.76	12032.1	10676	8488.7	10223.5	32764.7	28194.9	24564.7	22677.2	29355.6	25009.3	24680.7	24196.6	23697	24259.3	24648.5	23944.3	8986.53	8765.79	8112.92	8888.05	8055.67	9458.84
KMW0518	2,6-Octadien-1-ol, 3,7-dimethyl-, acetate, (Z)-	Ester	C12H20O2	141-12-8	264806	263354	294691	255486	275021	256357	828570	823283	799976	782542	809868	774376	683347	696475	679141	681312	656171	657974	85487.5	80788.9	80679.6	79943.3	80930.5	87668.2
XMW0693*050	2,6-Octadienoic acid, 3,7-dimethyl-, methyl ester	Ester	C11H18O2	2349-14-6	687975	674562	739282	700858	683501	683514	3.3022e+06	3.21027e+06	3.21012e+06	3.13948e+06	3.04425e+06	3.11666e+06	3.20648e+06	3.16549e+06	3.17284e+06	3.14393e+06	2.0629e+06	3.10954e+06	264033	252646	256238	221905	282770	228551
XMW0068	2,7-Nonadien-5-one, 4,6-dimethyl-	Ketone	C11H18O	74630-80-1	72671.5	78488.9	84551.4	64783.9	81974.3	57783.3	126317	143637	132367	121253	148335	138125	110062	113194	110200	112524	104915	95325.5	60197.5	54833.2	57549.9	59153.4	52169.1	59345.9
NMW0152*052	2,7-Octadiene-1,6-diol, 2,6-dimethyl-	Terpenoids	C10H18O2	64142-78-5	5061.01	10167.8	836.092	836.092	5417.91	5304.34	16731.6	17181.8	16883.4	17015.4	16395.9	16044.1	14207.1	14591.8	14671.3	13725.2	14669.1	14396.4	4180.46	5136.98	4267.06	4983.77	4720.52	5335.41
w18*052	2,7-Octadiene-1,6-diol, 2,6-dimethyl-, (Z)-	Alcohol	C10H18O2	103619-06-3	5061.01	10167.8	836.092	836.092	5417.91	5304.34	16731.6	17181.8	16883.4	17015.4	16395.9	16044.1	14207.1	14591.8	14671.3	13725.2	14669.1	14396.4	4180.46	5136.98	4267.06	4983.77	4720.52	5335.41
XMW0702	2-(3-Thienyl)pyridine	Heterocyclic compound	C9H7NS	21298-55-5	12322.5	11058.3	11155.1	11128.1	10305.7	7840.59	22544.2	20039.7	21843.1	21775.1	19343.3	14088.1	17782.2	17870.8	13313	15719.6	11900.7	15612.4	4540.83	4026.82	4636.2	4222.87	4972.87	3678.48
KMW0211	2-Acetylthiazole	Heterocyclic compound	C5H5NOS	24295-03-2	55328.2	56480	63311.9	53019.1	57231	55616.2	360942	328688	368587	335009	309729	193105	226874	235527	213104	220600	227665	202962	41301.8	41335.1	46024.3	45667	47489.5	41142.4
w39	2-Butanone, 4-(2,6,6-trimethyl-2-cyclohexen-1-yl)-	Ketone	C13H22O	31499-72-6	9600.7	9600.7	9600.7	9600.7	9600.7	48003.5	117492	154764	111705	157466	153007	129886	121547	123344	122344	113005	110453	105567	9600.7	9600.7	9600.7	9600.7	9600.7	9600.7
D352	2-Butenal, 2-methyl-4-(2,6,6-trimethyl-1-cyclohexen-1-yl)-	Aldehyde	C14H22O	3155-71-3	336274	349104	271496	80220.4	268661	268145	818469	907867	939011	786552	772916	613015	476312	479855	492572	485083	563000	487193	225695	242802	206236	210205	191834	290658
XMW1246	2-Butenoic acid, hexyl ester	Ester	C10H18O2	19089-92-0	1.02209e+06	651280	672681	572388	747592	864049	3.54571e+06	3.01127e+06	4.2935e+06	3.7748e+06	2.34222e+06	1.76941e+06	2.10917e+06	2.24315e+06	2.23694e+06	2.0885e+06	2.02517e+06	2.1939e+06	411702	378139	348377	69675.3	422248	498036
XMW1126	2-Cyclohexen-1-ol, 1-methyl-4-(1-methylethyl)-, trans-	Terpenoids	C10H18O	29803-81-4	433137	447721	472707	381642	455329	421912	1.60244e+06	1.55519e+06	1.65221e+06	1.49806e+06	1.45832e+06	1.22353e+06	1.08922e+06	1.38984e+06	1.27441e+06	1.32135e+06	981349	969404	257686	192106	194041	213197	178522	262494
D294	2-Cyclopenten-1-one, 2-pentyl-	Ketone	C10H16O	25564-22-1	4.81709e+06	4.92714e+06	5.10442e+06	4.82129e+06	4.84112e+06	4.67291e+06	1.65346e+07	1.63186e+07	1.63328e+07	1.55381e+07	1.50729e+07	1.52175e+07	1.28658e+07	1.28295e+07	1.26553e+07	1.25929e+07	1.21139e+07	1.21991e+07	3.70041e+06	3.37056e+06	3.43558e+06	3.70891e+06	3.79658e+06	3.68053e+06
D443	2-Furancarboxylic acid, hexyl ester	Ester	C11H16O3	39251-86-0	77659.6	74254.9	79587	74210.7	75286.3	72978.1	151701	142438	146274	147464	140931	129980	133575	131705	131250	126030	123888	118032	14595.6	14595.6	14595.6	14595.6	14595.6	14595.6
D81	2-Furanpropanoic acid, ethyl ester	Heterocyclic compound	C9H12O3	10031-90-0	47773.5	33726.1	26647.8	29204	37880.7	38712.2	184877	163135	214218	194853	138942	118391	115125	114466	121364	112996	84604.9	114085	19360.4	17499.8	16068.2	16875.2	19042.9	22318.9
XMW0183	2-Heptenal, 2-methyl-	Aldehyde	C8H14O	30567-26-1	1.58057e+06	1.6724e+06	1.79692e+06	1.76093e+06	1.7022e+06	1.71101e+06	7.87605e+06	7.34619e+06	7.34888e+06	7.78902e+06	6.99025e+06	7.09628e+06	6.94643e+06	6.17043e+06	6.85957e+06	6.71648e+06	6.45575e+06	6.62022e+06	1.23287e+06	1.17823e+06	1.29403e+06	1.07967e+06	1.15761e+06	1.14811e+06
KMW0188	2-Methyl-1,3-dithiacyclopentane	Heterocyclic compound	C4H8S2	5616-51-3	4.16683e+06	4.22143e+06	4.18364e+06	3.91276e+06	4.12744e+06	4.16471e+06	2.54721e+07	2.25785e+07	2.58148e+07	2.37027e+07	1.76826e+07	1.35674e+07	1.51186e+07	1.56901e+07	1.43633e+07	1.4631e+07	1.53896e+07	1.34803e+07	2.7938e+06	2.79321e+06	3.13175e+06	3.08978e+06	3.20884e+06	2.75674e+06
D429	2-Methyl-6-(p-tolyl)hept-2-en-4-ol	Terpenoids	C15H22O	38142-57-3	165094	127015	131412	115482	140192	143001	335637	342356	367696	308506	304182	237683	194778	214283	209812	199686	228153	208360	106590	115065	95012.9	99625.1	89842.2	136660
NMW0052	2-Methyl-6-methyleneocta-2,7-dien-4-one	Terpenoids	C10H14O	539-70-8	167984	182838	191946	121998	187733	126516	287776	325396	297206	275956	332965	306417	230292	265116	232487	235290	236494	220839	142956	112731	115002	122381	104499	139125
KMW0656	2-Naphthalenemethanol, decahydro-.alpha.,.alpha.,4a-trimethyl-8-methylene-, [2R-(2.alpha.,4a.alpha.,8a.beta.)]-	Terpenoids	C15H26O	473-15-4	74367.5	66114.5	73216.1	69941.6	70352.5	69918.5	138877	154824	135834	136821	142723	92888.1	94687.5	99816.3	98993.7	92278.9	166075	87719.1	49852.7	50838.2	44974	46689.3	43709.6	56318.6
KMW0376	2-Nonanol	Alcohol	C9H20O	628-99-9	6185.09	5902.59	6605.34	5973.09	5958.12	5887.56	17604.5	16875.1	17492.3	17577.9	14043.9	15781	16070.3	15537.8	16291.2	16255.7	15298.1	15838.7	5370.31	5732.48	5238.15	5743.18	5429.7	5490.7
KMW0326	2-Nonenal, (Z)-	Aldehyde	C9H16O	60784-31-8	24522	19824.3	19219.9	15890.3	19365.4	14722	72707.3	69450.8	76703.4	61065	40575.7	30542.8	54600.9	50266.6	52037.9	53695	59504.5	50835.5	6233.17	6943.24	5877.12	6149.39	5974.56	8473.16
KMW0294	2-Octen-1-ol, (E)-	Alcohol	C8H16O	18409-17-1	172386	172386	172386	172386	172386	172386	1.45645e+06	1.42085e+06	1.42318e+06	1.42037e+06	1.3275e+06	1.3716e+06	1.19257e+06	1.19413e+06	1.1523e+06	1.13833e+06	1.07665e+06	1.13065e+06	172386	172386	172386	172386	172386	172386
D350	2-Pentenoic Acid, 2-methyl-	Acid	C6H10O2	3142-72-1	4122.01	4545.15	5142.15	5034.28	4787.38	4345.24	15399.5	15183.8	14884.5	15561.5	14711.9	15192.2	14092.2	13807.3	14542.5	13987.5	13602.3	13683	3442.97	3129.04	3328.59	3459.29	2830.03	3090.15
XMW0368	2-Propenoic acid, 2-methyl-, (tetrahydro-2-furanyl)methyl ester	Ester	C9H14O3	2455-24-5	858727	534037	551572	458446	616165	697136	2.93884e+06	2.49361e+06	3.58434e+06	3.16438e+06	1.91355e+06	1.4332e+06	1.73359e+06	1.81552e+06	1.83061e+06	1.68883e+06	1.65716e+06	1.78594e+06	332126	303647	279869	287440	340136	394269
NMW0021	2-PyridinemethanAmine	Heterocyclic compound	C6H8N2	3731-51-9	2.20118e+06	2.20118e+06	2.20118e+06	2.20118e+06	2.20118e+06	2.20118e+06	2.17141e+07	2.08837e+07	2.07453e+07	2.12363e+07	1.97368e+07	1.99537e+07	1.77957e+07	1.7718e+07	1.75531e+07	1.72245e+07	1.5953e+07	1.68526e+07	2.20118e+06	2.20118e+06	2.20118e+06	2.20118e+06	2.20118e+06	2.20118e+06
XMW0370	2H-1-Benzopyran, 3,4,4a,5,6,8a-hexahydro-2,5,5,8a-tetramethyl-, (2.alpha.,4a.alpha.,8a.alpha.)-	Aromatics	C13H22O	41678-32-4	26172.7	18070.4	23780.8	26403.5	22124	24317.2	111178	108428	108793	74916.6	72175.9	73448.7	75751.3	74592.1	70612.5	73363.4	84979.5	73718.3	7328.91	7136.36	7033.73	7542.37	7775.72	7464.3
XMW0362	2H-Pyran-2-one, tetrahydro-4,6,6-trimethyl-	Heterocyclic compound	C8H14O2	20628-36-8	9112.8	8768.72	2439.53	7670.73	2073.46	7911.47	33565.7	31100.8	40098.5	30397.8	28014.2	19726.9	24086.7	25465.7	28575.4	29311.8	29240.8	27154.7	414.693	414.693	414.693	414.693	414.693	414.693
WMW0176	2H-Pyran-2-one, tetrahydro-6-methyl-	Heterocyclic compound	C6H10O2	823-22-3	353274	346497	359335	329422	348794	357315	1.04053e+06	1.64687e+06	657990	1.00482e+06	1.56747e+06	1.43206e+06	799031	1.50872e+06	965120	1.05747e+06	1.48346e+06	1.0758e+06	307842	287173	302398	308449	317745	303594
w24	3-Buten-2-one, 4-(4-hydroxy-2,2,6-trimethyl-7-oxabicyclo[4.1.0]hept-1-yl)-	Ketone	C13H20O3	38274-01-0	106536	79341.3	82623.3	46523.5	83348.9	87830.4	115753	117597	123814	106628	106636	145509	96079.6	103302	102701	97235.9	112243	99241.5	41423.7	45554	36383	38115.4	35340.9	54910.1
KMW0325	3-Cyclohexen-1-ol, 1-methyl-4-(1-methylethyl)-	Terpenoids	C10H18O	586-82-3	234286	255653	268481	213993	258532	230337	542909	570470	554935	522010	543815	470971	512971	531538	481687	497161	500161	478667	115736	103965	129459	111707	157153	110859
KMW0588	3-Cyclohexene-1-ethanol, .beta.,4-dimethyl-	Alcohol	C10H18O	18479-68-0	4.9753e+06	5.08588e+06	5.26997e+06	4.96873e+06	5.0015e+06	4.82673e+06	1.69701e+07	1.67376e+07	1.67565e+07	1.59582e+07	1.5469e+07	1.56383e+07	1.32253e+07	1.31593e+07	1.30028e+07	1.29079e+07	1.2473e+07	1.25489e+07	3.82897e+06	3.76033e+06	3.82589e+06	3.83822e+06	3.94021e+06	3.82762e+06
KMW0466	3-Cyclohexene-1-methanethiol, .alpha.,.alpha.,4-trimethyl-	Sulfur compounds	C10H18S	71159-90-5	2.98492e+07	3.23024e+07	3.36223e+07	2.98087e+07	3.1654e+07	2.9438e+07	1.05221e+08	1.03379e+08	1.02402e+08	9.95869e+07	9.65672e+07	9.7728e+07	8.18498e+07	8.26223e+07	8.07081e+07	8.06086e+07	7.56068e+07	7.77278e+07	2.32136e+07	2.27927e+07	2.34887e+07	2.34058e+07	2.38551e+07	2.33346e+07
D313	3-Hexene, 1-(1-ethoxyethoxy)-, (Z)-	Aldehyde	C10H20O2	28069-74-1	801644	801644	801644	801644	801644	801644	1.19313e+07	1.1369e+07	1.14016e+07	1.15047e+07	5.03052e+06	4.00822e+06	801644	801644	1.37674e+07	1.33186e+07	1.18722e+07	1.30089e+07	801644	801644	801644	801644	801644	801644
XMW1385	3-Imidazol-1-ylpropanenitrile	Heterocyclic compound	C6H7N3	23996-53-4	43089.7	44178.6	45369.4	38380.7	44187.9	42860.5	153827	157675	152500	143881	143798	103060	119161	82144.3	87921.8	88083.3	121103	80681.3	43756.9	40969.6	44659.8	49142	34362.3	54724.7
XMW0091	3-Isopropylidene-5-methyl-hex-4-en-2-one	Ketone	C10H16O	64149-32-2	86409.8	86409.8	86409.8	86409.8	86409.8	86409.8	694853	1.55069e+06	834164	651411	1.52104e+06	1.49021e+06	477239	969623	440382	433678	876105	432049	86409.8	86409.8	86409.8	86409.8	86409.8	86409.8
KMW0169	3-Mercapto-3-methylbutanol	Alcohol	C5H12OS	34300-94-2	9995.72	9997.86	10992.9	10296.5	10758.1	10826.5	31994.5	30506.7	30509.2	31854.4	28498	29969.1	28690.4	29885	28825	28034.5	27236.5	28294.7	5443.06	5498.83	7001.51	6577.65	6872.16	6388.67
KMW0213	3-Mercapto-3-methylbutyl formate (ester)	Ester	C6H12O2S	50746-10-6	438520	440245	392246	413868	441516	432189	2.16349e+06	1.88368e+06	2.17407e+06	2.00507e+06	1.7578e+06	1.17937e+06	1.32359e+06	1.37183e+06	1.25786e+06	1.28352e+06	1.33111e+06	1.18447e+06	258782	251980	279379	269631	280330	251540
XMW1490	3-MethoxycinnamAldehyde	Aldehyde	C10H10O2	56578-36-0	253591	245455	260698	262907	256896	256364	676020	467443	628339	460137	644764	490064	589728	598933	601129	503698	490746	438697	183644	170642	172188	183717	192462	187051
WMW0100	3-Nonen-1-ol, (E)-	Alcohol	C9H18O	10339-61-4	5684.7	5420.85	6053.34	5330.66	4928.78	5478.07	6150.14	6110.8	6110.7	6035.89	5135.57	15366	7363.63	7490.75	6601.77	7056.21	6787.65	6776.96	3475.96	3269.64	3244.45	3820.57	3354.27	3771.82
KMW0163	3-Thiophenethiol	Heterocyclic compound	C4H4S2	7774-73-4	38387.1	40482.5	43575.1	41513.1	41323.1	40725.5	145609	132148	134550	143281	127911	132311	132527	136046	132625	130034	119783	127920	26827.6	24655.6	27047	19427.2	25145.5	23885.8
XMW1290	3-n-Propyl-2-pyrazolin-5-one	Heterocyclic compound	C6H10N2O	29211-70-9	55991.7	55616.1	55696.5	54735.3	55628.4	54574.1	92545.3	93266.1	90777.4	88628.2	89440.5	86857.2	82589.2	82577.6	80905.4	80758.8	74019.9	78566.5	41692.9	42633.3	41590.6	42101.4	43136.8	43203.9
XMW1378	4,6-Octadiyn-3-one, 2-methyl-	Ketone	C9H10O	29743-33-7	5.86754e+06	6.02574e+06	6.15873e+06	6.10624e+06	5.91654e+06	5.96126e+06	5.54535e+07	4.99812e+07	5.49609e+07	5.24243e+07	4.74365e+07	1.19601e+07	2.82953e+07	2.91336e+07	2.66709e+07	2.72416e+07	3.73139e+07	2.58294e+07	2.35114e+06	2.25264e+06	2.37294e+06	2.33588e+06	2.5394e+06	2.20025e+06
KMW0374	4-Hexen-1-ol, 5-methyl-2-(1-methylethenyl)-, (R)-	Terpenoids	C10H18O	498-16-8	13182	12992.1	22990.9	11147.2	12353.3	14494.6	73635	66384.4	74130.8	68821.5	71286.2	74988.8	64353.9	64443.7	66482.2	66948.5	64524.1	61105.3	26805.9	30854.4	33182.6	36221.7	26049.3	30529.8
XMW0898	4-Isobutylpyrimidine	Heterocyclic compound	C8H12N2	98489-37-3	286066	288555	365679	297736	284564	274174	741218	668093	693772	719895	599328	684899	495249	506369	484921	482357	431207	490857	107738	112264	112181	113893	129134	112965
KMW0473	4-Isopropylcyclohexa-1,3-dienecarbAldehyde	Aldehyde	C10H14O	1197-15-5	3.75707e+06	3.82911e+06	3.98227e+06	3.7462e+06	3.77795e+06	3.62044e+06	1.23338e+07	1.21084e+07	1.2128e+07	1.16592e+07	1.13724e+07	1.144e+07	9.72448e+06	9.6877e+06	9.55413e+06	9.44268e+06	9.13959e+06	9.22782e+06	2.6799e+06	2.66411e+06	2.70346e+06	2.88358e+06	2.96766e+06	2.86116e+06
XMW0952	4-Methylhexyl 3-methylbutanoate	Ester	C12H24O2	1215127-80-2	59032.4	57874.2	63797.6	60770.5	58538.2	58492.3	289029	280267	280460	273512	265300	272146	281678	275895	278281	275573	183610	271383	11574.8	11574.8	11574.8	11574.8	11574.8	11574.8
D411	4-Methylpentyl 2-methylbutanoate	Ester	C11H22O2	35852-40-5	33938.6	33779.1	34412.5	27954.2	34085.9	30506.1	155728	148943	159297	143331	141588	120382	88601.2	89734.8	81055	84338.7	102023	78009.7	7847.32	7540.45	7677.66	7975.64	6910.26	7306.39
NMW0792	4-Pyridinecarbonitrile	Heterocyclic compound	C6H4N2	100-48-1	104108	110955	118487	113999	112444	112066	379315	354123	360358	374307	341617	354742	342247	366965	344752	334789	323291	345616	72949.1	69059.3	74524.4	74675.2	78725.1	66443.7
XMW0051	4-Pyridinecarboxaldehyde	Heterocyclic compound	C6H5NO	872-85-5	2.14068e+06	2.25255e+06	2.06206e+06	2.01029e+06	2.28312e+06	1.99172e+06	6.82715e+06	6.46584e+06	6.61327e+06	6.68251e+06	6.26533e+06	6.44184e+06	6.07024e+06	6.11953e+06	6.14991e+06	5.97296e+06	5.8213e+06	5.85192e+06	1.45659e+06	1.38212e+06	1.50375e+06	1.05658e+06	1.12934e+06	1.3392e+06
XMW0023	4-methyl-1-(1-methylethyl)-Bicyclo[3.1.0]hex-2-ene	Hydrocarbons	C10H16	28634-89-1	5.7536e+06	7.52596e+06	8.12642e+06	7.70757e+06	7.71276e+06	6.18486e+06	2.19906e+07	2.06555e+07	2.0949e+07	2.18664e+07	1.9974e+07	2.06167e+07	1.94658e+07	2.00477e+07	1.95862e+07	1.89532e+07	1.87405e+07	1.89282e+07	4.10144e+06	3.85174e+06	4.17115e+06	4.14263e+06	4.4124e+06	3.69155e+06
D358	4-tert-Butylcyclohexyl acetate	Ester	C12H22O2	32210-23-4	5103.15	5103.15	5103.15	5103.15	5103.15	5103.15	34463.5	33997.8	34653.9	33095.1	26514	27587.6	27669.2	28661.4	28398.6	29108	29270.2	29881	25515.8	31525.7	26346.8	28857.6	29867.1	33459.1
WMW0226	4H-Pyran-4-one	Heterocyclic compound	C5H4O2	108-97-4	73442	77061.6	83651.3	51591.4	79011.3	77233.5	223199	212086	214729	220815	204203	210894	199953	204634	203199	196805	207048	194752	35657.6	41595.2	35806.2	46059.9	39000.5	40030.5
D412	5,7-Octadien-4-one, 2,6-dimethyl-, (Z)-	Terpenoids	C10H16O	3588-18-9	202840	172692	167658	138620	166950	160372	820792	770237	844845	694662	586424	441541	598940	585620	546430	582145	648393	538291	47089.4	52633.5	41271.4	43404.6	47382.7	63754.4
WMW0058	5-Hepten-2-ol, 6-methyl-	Alcohol	C8H16O	1569-60-4	80599.4	85430.7	90625.2	94684.1	84836	93065.7	334943	293026	302998	332397	280055	225225	286629	292483	282095	275866	203096	274714	42586	51022.1	56566.8	57529.5	61629.2	47463.8
NMW0055	6-Octenal, 3,7-dimethyl-, (R)-	Terpenoids	C10H18O	2385-77-5	171140	184982	196598	149995	193534	172035	413309	463728	424732	397755	473332	437104	310486	317431	311075	315639	324167	295746	155857	132320	135403	144105	121059	149435
KMW0250	7-Octen-2-ol, 2,6-dimethyl-	Terpenoids	C10H20O	18479-58-8	184739	184739	184739	184739	184739	184739	1.77558e+06	1.73333e+06	1.7358e+06	1.73367e+06	1.62588e+06	1.66744e+06	1.48528e+06	1.49183e+06	1.46711e+06	1.43876e+06	1.34827e+06	1.41365e+06	184739	184739	184739	184739	184739	184739
KMW0319*031	7-Oxabicyclo[4.1.0]heptane, 1-methyl-4-(1-methylethenyl)-	Terpenoids	C10H16O	1195-92-2	18915.9	20136.2	22076.3	30272.1	20594.3	24096.3	84779.4	84605.7	83976.8	79224.8	79041.3	77458.8	68871.1	69911.6	64213.6	66214	65158.5	63164.2	18729.4	16892.7	18673.7	18594	17533.4	18743.8
NMW0225	Acetamide, N-(2-phenylethyl)-	Amine	C10H13NO	877-95-2	220495	194634	179319	191992	207326	200708	1.56775e+06	1.55439e+06	1.52728e+06	1.50978e+06	1.49222e+06	382425	588325	583521	568423	661312	664352	702193	200009	157073	157548	196152	201733	202924
NMW0157	Acetamide, N-phenyl-	Amine	C8H9NO	103-84-4	166528	176406	199519	171073	169981	170725	828570	823283	799976	782542	809868	774376	683347	696475	679141	681312	656171	657974	54248.7	53310.5	53149	49787.8	52219.6	55292.8
XMW1070	Acetic Acid, (acetyloxy)-	Acid	C4H6O4	13831-30-6	8384.91	8228.4	8835.21	7943.53	8137.43	8587.25	38535.6	34119.6	40041.3	36662	31737.1	22711.4	25120.4	25899.2	29038.5	29974.3	25189.3	26706	4335.59	4211.6	4726.29	4659.23	4984.57	4421.92
KMW0481	Acetic acid, nonyl ester	Ester	C11H22O2	143-13-5	307653	267918	308964	260808	290443	277189	534768	481217	502189	506322	491011	381271	467332	457856	441490	421196	443029	392831	223282	211718	217966	218756	228259	227309
KMW0233	Acetophenone	Ketone	C8H8O	98-86-2	4.02449e+06	4.02449e+06	4.02449e+06	4.02449e+06	4.02449e+06	4.02449e+06	4.07515e+07	3.7586e+07	3.76906e+07	3.9248e+07	3.59666e+07	3.57014e+07	3.17178e+07	3.15121e+07	3.13083e+07	3.08464e+07	2.95103e+07	3.00741e+07	4.02449e+06	4.02449e+06	4.02449e+06	4.02449e+06	4.02449e+06	4.02449e+06
KMW0576	Aromandendrene	Terpenoids	C15H24	489-39-4	6.37586e+06	6.22474e+06	6.31501e+06	1.24486e+06	6.25497e+06	6.22429e+06	1.14577e+07	1.14175e+07	1.08079e+07	1.11106e+07	1.09856e+07	9.85823e+06	9.85032e+06	9.79716e+06	9.66978e+06	9.38583e+06	9.26871e+06	8.98559e+06	1.24486e+06	1.24486e+06	1.24486e+06	1.24486e+06	1.24486e+06	1.24486e+06
XMW1160	BenzAldehyde diethylacetal	Aldehyde	C11H16O2	774-48-1	4.73108e+06	4.79756e+06	4.8901e+06	4.7198e+06	4.72403e+06	4.60424e+06	1.66531e+07	1.6373e+07	1.63279e+07	1.55759e+07	1.49731e+07	1.52518e+07	1.27541e+07	1.27632e+07	1.25338e+07	1.24807e+07	1.19628e+07	1.20663e+07	3.62065e+06	3.55553e+06	3.65825e+06	3.64951e+06	3.72695e+06	3.61551e+06
XMW0255	BenzAldehyde, 2,4-dimethyl-	Aldehyde	C9H10O	15764-16-6	49381.6	45736.5	45388.6	37344.2	46681.4	41893.5	170391	193847	174760	166518	146175	76420.4	129630	130224	127078	122839	150727	114833	25950.4	24724	23641.7	24138.1	24618.9	28397.5
WMW0061	BenzAldehyde, 2-ethyl-	Aldehyde	C9H10O	22927-13-5	5552.59	3460.99	3735.67	3100.85	4023.3	5057.19	16946.9	13643.8	20242.9	17834.2	11460.3	9141.29	10040.8	10174.9	10506.3	9575.85	10056.4	9964.01	1632.33	1441.98	1419.88	1478.15	1832.74	3119.96
NMW0254	BenzAldehyde, 3,4-dihydroxy-	Aldehyde	C7H6O3	139-85-5	84390	59394.5	43512	44175	47623	49263.9	150402	149476	165381	135152	141088	132392	122350	122233	122305	122766	138374	85628	40442.7	43274.5	36946.4	36774.7	33066.3	50054.5
NMW0069	BenzenAmine, 2,5-dimethyl-	Amine	C8H11N	95-78-3	5063.32	4233.09	5047.05	4373.93	6558.33	4596.75	19310.5	18353.7	17925.6	17697.4	15389.9	12214.6	9350.83	9852.98	8568.95	9395.78	14529.3	8853.73	3315.69	3195.59	3304.28	3694.63	2846.78	3177.46
XMW0715	BenzenAmine, 4-ethoxy-	Amine	C8H11NO	156-43-4	9.61629e+06	9.74034e+06	1.00052e+07	9.58618e+06	9.59528e+06	9.35596e+06	3.42258e+07	3.37183e+07	3.36631e+07	3.21229e+07	3.0816e+07	3.13186e+07	2.60922e+07	2.61931e+07	2.57402e+07	2.56649e+07	2.45014e+07	2.47443e+07	7.38159e+06	7.25202e+06	7.45667e+06	7.43034e+06	7.58466e+06	7.3666e+06
KMW0224	Benzene, (methoxymethyl)-	Ether	C8H10O	538-86-3	594817	620186	562736	543713	536825	538105	1.88729e+06	1.80748e+06	1.83396e+06	1.83092e+06	1.73966e+06	1.77866e+06	1.66482e+06	1.92727e+06	1.68529e+06	1.64302e+06	1.61603e+06	1.60135e+06	401238	260858	286475	363822	386529	368278
KMW0150	Benzene, 1,2,4-trimethyl-	Aromatics	C9H12	95-63-6	176161	189518	211299	201449	194490	195336	873780	785197	793489	858580	748274	773900	748946	766422	737484	723004	690559	719674	105365	102111	112088	115709	124445	99164.2
XMW1095	Benzene, 1,2-diethyl-3,4,5,6-tetramethyl-	Aromatics	C14H22	33884-69-4	252703	252703	252703	252703	252703	252703	3.36699e+06	3.29563e+06	3.24058e+06	3.21166e+06	3.18206e+06	2.81025e+06	2.09154e+06	1.9414e+06	1.97002e+06	2.16108e+06	2.15033e+06	1.26352e+06	252703	252703	252703	252703	252703	252703
XMW0786	Benzene, 1,3,5-triethyl-	Aromatics	C12H18	102-25-0	3360.6	3216.67	3652.73	3086.97	3192.93	3070	6023.88	5549.89	5303.58	5872.43	5076.01	5169.31	5246.55	4978.09	5242.6	4955	4808.77	4974.76	1359.95	1924.99	1059.13	874.519	1146.75	1411.28
XMW0011*094	Benzene, 1,4-diethyl-	Aromatics	C10H14	105-05-5	1.32542e+07	1.34414e+07	1.83254e+07	1.26714e+07	1.36987e+07	1.33527e+07	8.64142e+07	7.67041e+07	8.71659e+07	7.96929e+07	6.60523e+07	4.51255e+07	4.55322e+07	5.34439e+07	4.27815e+07	4.41664e+07	4.56166e+07	4.05051e+07	9.79813e+06	9.83232e+06	1.10075e+07	9.44435e+06	9.73587e+06	9.77909e+06
WMW0053	Benzene, 1-(1,5-dimethylhexyl)-4-methyl-	Terpenoids	C15H24	1461-02-5	1.02281e+06	925690	1.02166e+06	958108	965540	948756	1.32634e+06	1.22204e+06	1.32301e+06	1.24698e+06	1.25221e+06	1.42472e+06	1.17528e+06	1.18374e+06	1.1894e+06	1.21893e+06	1.26873e+06	1.2113e+06	549098	529211	530482	541096	553930	573829
NMW0791	Benzene, 1-ethyl-2-methyl-	Aromatics	C9H12	611-14-3	1.0745e+06	1.13519e+06	1.21006e+06	1.16266e+06	1.15291e+06	1.14828e+06	3.95027e+06	3.58333e+06	3.66559e+06	3.89408e+06	3.45825e+06	3.57771e+06	3.56075e+06	3.65371e+06	3.56949e+06	3.5039e+06	3.25977e+06	3.44887e+06	739233	696552	757853	753534	555694	673191
NMW0789	Benzene, 1-ethyl-3-methyl-	Aromatics	C9H12	620-14-4	54649	59230.1	66634.4	62698.4	60861.9	60700.5	282103	244125	265947	277463	232841	269550	241612	254654	242124	237630	218429	244062	33228.8	32499.7	36780.8	36233.2	38855.4	30945.7
KMW0192	Benzene, 1-methoxy-2-methyl-	Ether	C8H10O	578-58-5	513467	526568	557966	553175	510282	522281	1.26159e+06	1.14013e+06	1.18419e+06	1.23492e+06	1.02226e+06	1.17403e+06	847065	867291	826218	824583	737873	832591	197360	203340	204047	203423	254463	226534
XMW1469	Benzene, 1-methoxy-4-(1-methylpropyl)-	Ether	C11H16O	4917-90-2	8925.47	9183.44	9201.61	8537.65	8846.98	8111.9	38664.7	37559.8	37632.9	36051.6	34031	32068.8	24550.7	24730.1	24030.3	23914.9	23048.8	22823.1	7862.84	7752.8	8223.1	8103.34	8276.59	7805.13
XMW0126*016	Benzene, 1-methyl-3-(1-methylethyl)-	Terpenoids	C10H14	535-77-3	3.96988e+07	4.02233e+07	4.08924e+07	3.73058e+07	3.9143e+07	3.96288e+07	2.33673e+08	2.10227e+08	2.35887e+08	2.18516e+08	1.97428e+08	1.26585e+08	1.46679e+08	1.51378e+08	1.40373e+08	1.42382e+08	1.49015e+08	1.31446e+08	2.80261e+07	2.80615e+07	3.14896e+07	3.09776e+07	3.22746e+07	2.7786e+07
NMW0117	Benzene, 2,4-pentadiynyl-	Aromatics	C11H8	41268-41-1	893591	975713	1.01695e+06	896703	951813	876579	3.32547e+06	3.26401e+06	3.23146e+06	3.15156e+06	3.04558e+06	3.08289e+06	2.58749e+06	2.6181e+06	2.55114e+06	2.55778e+06	2.38845e+06	2.45732e+06	701141	684557	707567	701936	718153	699152
XMW0545	Benzenemethanamine, N-(1-methylethyl)-	Amine	C10H15N	102-97-6	21752.5	14816.1	14770.6	7095.16	16539.4	10506.6	73940.9	86315.4	89310.9	72072.3	62502.1	39277	50625.2	54145.2	55812.7	53638.7	60270.7	52535.3	9853.79	5657.8	4730.66	8287.86	5153.97	12314.2
NMW0022	Benzenemethanol, .alpha.-methyl-	Alcohol	C8H10O	98-85-1	5.59834e+06	5.59834e+06	5.59834e+06	5.59834e+06	5.59834e+06	5.59834e+06	5.5477e+07	5.34401e+07	5.31142e+07	5.41841e+07	5.06951e+07	5.14764e+07	4.53001e+07	4.50878e+07	4.46238e+07	4.37421e+07	4.04803e+07	4.28223e+07	5.59834e+06	5.59834e+06	5.59834e+06	5.59834e+06	5.59834e+06	5.59834e+06
NMW0183	Benzenemethanol, 4-hydroxy-	Alcohol	C7H8O2	623-05-2	2.14318e+06	2.14318e+06	1.07159e+07	2.14318e+06	2.14318e+06	2.14318e+06	2.1184e+07	2.09449e+07	2.01709e+07	2.04467e+07	2.01948e+07	1.75444e+07	1.81106e+07	1.79921e+07	1.7736e+07	1.67849e+07	1.65659e+07	1.60481e+07	2.14318e+06	2.14318e+06	2.14318e+06	2.14318e+06	2.14318e+06	2.14318e+06
KMW0450	Benzenemethanol, 4-methoxy-	Phenol	C8H10O2	105-13-5	323930	322344	359404	322388	317666	314657	1.24187e+06	1.21852e+06	1.21006e+06	1.16861e+06	1.12744e+06	1.14672e+06	955718	965097	943681	940986	881386	904540	245682	240284	249158	247780	253706	246698
NMW0160	Benzoic Acid, 2,3-dihydroxy-	Acid	C7H6O4	303-38-8	3967.37	4089.17	4387.77	4009.58	3758.48	4086.39	17866.1	16947.8	17071.8	16937.3	16190.6	12938.8	12854.3	13278.7	12767.2	12043.3	12217.6	12150.9	751.696	751.696	751.696	751.696	751.696	751.696
w13	Benzoic acid, 2-methyl-, methyl ester	Ester	C9H10O2	89-71-4	4759.99	2656.19	2792.36	2302.85	3049.45	4252.18	15328.3	13060.8	17765.4	16244	11006.1	6443.54	9539.23	9272.59	10193.6	9311.54	9220.11	9459.6	1744.18	1902.84	1410.7	1370.63	1630.33	2182.91
WMW0212	Benzoic acid, 4-ethoxy-, ethyl ester	Ester	C11H14O3	23676-09-7	424567	286339	411081	281275	410226	294957	1.81146e+06	1.73284e+06	1.75051e+06	1.71992e+06	1.65956e+06	1.03427e+06	1.12129e+06	1.57929e+06	1.57447e+06	1.09194e+06	1.10731e+06	920395	321125	310680	304533	314380	319853	330468
KMW0373	Benzoic acid, ethyl ester	Ester	C9H10O2	93-89-0	43545	28008.8	29121.7	24947.7	32036.2	37082.9	140775	116334	160231	148593	97212.7	55897	83366.6	84078.4	89923.1	81826.5	83563.8	83838.6	18083.8	16669.8	10173.3	10556.4	18258.9	21313.3
KMW0426	Benzonitrile	Nitrogen compounds	C7H5N	100-47-0	45596.7	49312.8	55649.2	52756	51056.9	50895.9	228072	203641	206334	223756	194883	200441	195651	198783	191635	187991	180233	187690	28945.9	27067.4	29478.9	30302.7	32316.3	26741
D423	Benzyl tiglate	Ester	C12H14O2	37526-88-8	672529	617822	553109	656848	658270	634986	2.0647e+06	2.15823e+06	1.91227e+06	2.00751e+06	1.98721e+06	1.97593e+06	1.45839e+06	1.19425e+06	1.44046e+06	1.32526e+06	1.27023e+06	1.24316e+06	371876	348643	350069	360815	389360	364459
NMW0013	Benzylamine	Amine	C7H9N	100-46-9	185015	187266	198230	196927	183867	185699	437982	394224	410279	428435	354168	412172	296904	301776	289017	288523	260083	291022	70142.9	69541.4	69442.3	70354.2	80566.6	72367.3
QWM0005	Berteroin	Others	C7H13NS2	4430-42-6	1442.49	1442.49	1442.49	1442.49	1442.49	1442.49	10249.2	7660.18	10033.2	8293.64	9278.61	9913.94	8789.87	8273.88	8344.46	10041.6	9771.07	7212.47	1442.49	1442.49	1442.49	1442.49	1442.49	1442.49
WMW0202*009	Bicyclo[2.2.1]hept-2-ene, 1,7,7-trimethyl-	Terpenoids	C10H16	464-17-5	20029	23639.3	26531.5	16007.6	24281.2	16870.2	53535.5	38786.6	49859.3	50136.5	70212.9	49352.4	45781.9	51243.3	48837.7	47611.7	39129.5	49169.4	10216.8	6359.17	7475.79	7630.38	7950.79	9612.68
NMW0065*092	Bicyclo[2.2.1]heptan-2-ol, 1,7,7-trimethyl-, (1S-endo)-	Terpenoids	C10H18O	464-45-9	299924	319477	336731	282034	319466	332601	1.96676e+06	1.83543e+06	1.96638e+06	1.80615e+06	1.48085e+06	1.54688e+06	1.56532e+06	1.32122e+06	1.33751e+06	1.38906e+06	1.60719e+06	1.24981e+06	645017	622384	656278	711441	514945	606360
WMW0201	Bicyclo[2.2.1]heptane, 7,7-dimethyl-2-methylene-	Terpenoids	C10H16	471-84-1	279321	297245	327346	306299	304777	304155	1.37488e+06	1.22236e+06	1.30899e+06	1.37017e+06	1.17765e+06	1.32026e+06	1.16037e+06	1.22562e+06	1.18129e+06	1.14974e+06	1.06971e+06	1.16768e+06	166177	160379	179782	178530	191540	152021
XMW0889	Bicyclo[3.1.0]hex-2-ene, 4-methylene-1-(1-methylethyl)-	Terpenoids	C10H14	36262-09-6	246401	262342	287589	269388	267574	267619	947227	1.06767e+06	1.13787e+06	1.19012e+06	1.02973e+06	1.14515e+06	816791	859307	825721	805255	732228	833291	146320	139802	157681	125597	166109	133403
D276	Bicyclo[3.1.0]hex-3-en-2-one, 4-methyl-1-(1-methylethyl)-	Terpenoids	C10H14O	24545-81-1	38324.5	38708.9	39665.5	33432.2	38196.9	33379.8	72227.3	97776.1	67622	65538.1	83177.4	70135.6	73378.1	72019.8	67819.5	77546.2	79042.4	67694.4	29482.5	30161	29858.6	31309.2	19127.4	30688.5
KMW0301*155	Bicyclo[3.1.0]hexan-2-ol, 2-methyl-5-(1-methylethyl)-, (1.alpha.,2.alpha.,5.alpha.)-	Terpenoids	C10H18O	17699-16-0	2.03844e+07	2.03844e+07	2.03844e+07	2.03844e+07	2.03844e+07	2.03844e+07	1.99406e+08	1.86691e+08	1.92565e+08	1.90566e+08	1.74988e+08	1.82207e+08	1.56617e+08	1.59737e+08	1.53788e+08	1.51169e+08	1.48422e+08	1.48461e+08	2.03844e+07	2.03844e+07	2.03844e+07	2.03844e+07	2.03844e+07	2.03844e+07
KMW0257*155	Bicyclo[3.1.0]hexan-2-ol, 2-methyl-5-(1-methylethyl)-, (1.alpha.,2.beta.,5.alpha.)-	Terpenoids	C10H18O	15537-55-0	2.03844e+07	2.03844e+07	2.03844e+07	2.03844e+07	2.03844e+07	2.03844e+07	1.99406e+08	1.86691e+08	1.92565e+08	1.90566e+08	1.74988e+08	1.82207e+08	1.56617e+08	1.59737e+08	1.53788e+08	1.51169e+08	1.48422e+08	1.48461e+08	2.03844e+07	2.03844e+07	2.03844e+07	2.03844e+07	2.03844e+07	2.03844e+07
WMW0204	Bicyclo[3.1.0]hexan-3-ol, 4-methylene-1-(1-methylethyl)-, acetate	Terpenoids	C12H18O2	3536-54-7	7.47103e+06	7.63722e+06	7.92025e+06	7.46033e+06	7.52728e+06	7.2455e+06	2.52076e+07	2.48631e+07	2.49435e+07	2.37183e+07	2.30092e+07	2.32266e+07	1.97084e+07	1.95902e+07	1.93668e+07	1.92122e+07	1.85767e+07	1.86697e+07	5.74182e+06	5.64111e+06	5.72995e+06	5.7461e+06	5.90285e+06	5.72511e+06
KMW0178	Bicyclo[3.1.0]hexane, 4-methylene-1-(1-methylethyl)-	Terpenoids	C10H16	3387-41-5	9.28914e+06	9.48897e+06	1.1591e+07	9.75603e+06	1.10181e+07	9.61432e+06	3.13741e+07	2.92659e+07	2.97496e+07	3.10044e+07	2.82317e+07	2.93019e+07	2.82523e+07	2.90361e+07	2.84261e+07	2.75839e+07	2.65924e+07	2.74167e+07	5.71367e+06	5.3792e+06	5.84997e+06	6.31212e+06	6.74925e+06	5.16023e+06
XMW0632	Bicyclo[3.1.1]hept-2-ene, 3,6,6-trimethyl-	Terpenoids	C10H16	4889-83-2	117102	122179	134953	125774	126519	124697	564408	506444	536861	563509	488661	542095	477727	504117	488783	471947	442203	481706	67559.4	66041.1	73916.6	73190.7	78480.3	62549
NMW0151	Bicyclo[3.1.1]hept-2-ene-2-carboxylic acid, 6,6-dimethyl-	Terpenoids	C10H14O2	19250-17-0	4288.57	6532.17	7616.3	4821.41	4421.73	4522.23	23545	34119.2	23324.5	32109	23305.3	21783.7	21387.7	20492.1	19661.9	19964.9	18247.3	20265.5	1591.53	2147.58	1457.64	1398.29	1462.15	2356.72
NMW0074*039	Bicyclo[3.1.1]hept-2-ene-2-methanol, 6,6-dimethyl-	Terpenoids	C10H16O	515-00-4	20415.7	22097.9	23620.4	21191.9	23468.2	18674.7	133151	129960	135214	129904	141957	112424	81102.9	86701	79494.2	80113.7	94661.7	74899.4	9954.99	8383.98	9165.5	9384.53	9532.88	10279.3
D307	Bicyclo[3.1.1]heptan-3-ol, 2,6,6-trimethyl-, (1.alpha.,2.beta.,3.alpha.,5.alpha.)-	Terpenoids	C10H18O	27779-29-9	70206.2	47964.2	48598.7	41337.8	53255.1	54798.6	247510	215989	290181	257463	174464	140326	152703	162923	161792	153620	146803	157644	29485.2	26669.4	23828.9	25641.6	27269.8	33749.5
WMW0042*153	Bicyclo[3.1.1]heptan-3-ol, 6,6-dimethyl-2-methylene-	Terpenoids	C10H16O	5947-36-4	402860	380313	392067	326888	383927	357924	1.66835e+06	1.53822e+06	1.72282e+06	1.52864e+06	1.41244e+06	1.00895e+06	1.3871e+06	1.40584e+06	1.37521e+06	1.34819e+06	1.08329e+06	1.27853e+06	188113	179073	183617	185979	183176	192566
NMW0046*153	Bicyclo[3.1.1]heptan-3-ol, 6,6-dimethyl-2-methylene-, [1S-(1.alpha.,3.alpha.,5.alpha.)]-	Terpenoids	C10H16O	547-61-5	402860	380313	392067	326888	383927	357924	1.66835e+06	1.53822e+06	1.72282e+06	1.52864e+06	1.41244e+06	1.00895e+06	1.3871e+06	1.40584e+06	1.37521e+06	1.34819e+06	1.08329e+06	1.27853e+06	188113	179073	183617	185979	183176	192566
XMW0531	Bicyclo[3.1.1]heptan-3-one, 2,6,6-trimethyl-, (1.alpha.,2.beta.,5.alpha.)-	Terpenoids	C10H16O	15358-88-0	99315.2	61448.7	62432.7	53422.1	70695.4	81812	513564	457300	520428	372722	404650	249420	381760	389547	392935	374198	419922	361163	38141.9	34867.2	32606.8	32174.9	39368.8	45862.7
XMW0004*119	Bicyclo[3.1.1]heptane, 6,6-dimethyl-2-methylene-, (1S)-	Terpenoids	C10H16	18172-67-3	3.85023e+07	4.05305e+07	4.34586e+07	4.16926e+07	4.12822e+07	4.10114e+07	1.29366e+08	1.21168e+08	1.23419e+08	1.27786e+08	1.1704e+08	1.21086e+08	1.17249e+08	1.20313e+08	1.17995e+08	1.1438e+08	1.1055e+08	1.13821e+08	2.51531e+07	2.50701e+07	2.72624e+07	2.70723e+07	2.89334e+07	2.41786e+07
XMW1381	Bicyclo[3.2.1]oct-2-ene, 3-methyl-4-methylene-	Terpenoids	C10H14	49826-53-1	105486	103665	106078	66502.4	102028	92362.8	209627	287844	200625	190025	156311	183086	173611	168380	154715	164855	166474	158382	50238.1	50078.5	39849.4	49057.6	49242.9	57284.2
KMW0152	Butane, 1-isothiocyanato-	Others	C5H9NS	592-82-5	4674.17	5072.2	5366.72	5285.39	5259.52	4223.97	22435.4	19459.6	21015.7	22390.8	19498	21561.1	16287.3	17605.7	16764.7	16112.8	15242.1	16585.3	2939.76	2664.76	2427.19	2279.98	2203.17	2610.15
XMW0718	Butanedioic acid, methyl-, dimethyl ester	Ester	C7H12O4	1604-11-1	33088.3	33088.3	33088.3	33088.3	33088.3	33088.3	221620	217463	214075	209195	204136	207298	183325	182565	178143	178147	170137	176144	33088.3	33088.3	33088.3	33088.3	33088.3	33088.3
NMW0793	Butanoic Acid, 3-hydroxy-3-methyl-	Acid	C5H10O3	625-08-1	276743	296185	315053	300071	297755	297113	994907	923858	945323	975559	894000	928862	892081	953065	899532	871349	839687	900452	191416	181100	196837	196805	209062	174673
WMW0087	Butanoic Acid, 3-methylbutyl ester	Ester	C9H18O2	106-27-4	266053	266053	266053	266053	266053	266053	2.76951e+06	2.6241e+06	2.60911e+06	2.69546e+06	2.48516e+06	2.50152e+06	2.21403e+06	2.19838e+06	2.17815e+06	2.14122e+06	1.98384e+06	2.0966e+06	266053	266053	266053	266053	266053	266053
XMW1253	Butanoic acid, 1-methyloctyl ester	Ester	C13H26O2	69727-42-0	50561	50561	378512	50561	50561	50561	548079	415134	569267	377259	402292	421858	252805	256067	255392	254390	320422	262337	50561	50561	50561	50561	50561	50561
w44	Butanoic acid, 2-butoxy-1-methyl-2-oxoethyl ester	Ester	C11H20O4	7492-70-8	6720.77	5663.27	6053.38	5342.49	5615.58	5632.44	9831.74	13566.9	9696.54	14556.9	12950.7	9622.91	9400.24	9324.58	8797.01	10931	8048.36	8231.7	1976.8	3241.54	2726.58	2792.28	2765.19	3008.22
XMW0887	Butanoic acid, 2-methyl-, propyl ester	Ester	C8H16O2	37064-20-3	12317.8	12638.8	14078.2	13428.9	12823.4	13105.9	58050.2	52165	54085.8	57082.2	50217.2	55333.9	48440.5	51276.1	48674.8	47339.9	44872.4	49647.2	5681.36	5488.96	7964.51	7772.35	7944.61	5235.45
XMW1292	Butanoic acid, 2-methylpropyl ester	Ester	C8H16O2	539-90-2	3283.3	3511.5	3285.67	3490.77	3723.97	3501.7	14910.6	13676.2	14456.8	15391.8	13345.8	14917	13045.1	13440	13036.5	12608.2	12063.7	13463.1	656.661	656.661	656.661	656.661	656.661	656.661
XMW1069	Butanoic acid, 3-hexenyl ester, (E)-	Ester	C10H18O2	53398-84-8	206502	137097	140318	120280	154608	169578	775221	675019	922250	814025	536701	429567	475759	504198	501848	476845	452040	491684	81186.7	74143.5	69650.7	71054	83282.8	97585.7
XMW0304	Butanoic acid, 5-hexenyl ester	Ester	C10H18O2	108058-75-9	63831.5	42567.9	43302.5	36484.4	47650.4	48897.1	179016	151197	205795	238891	157625	124286	105900	106469	114936	103360	131872	106898	25727.4	24090.1	20933.7	22279.7	24380	30272.6
KMW0500	Butanoic acid, phenylmethyl ester	Ester	C11H14O2	103-37-7	23885.2	26607.6	29506	24485.8	27259.2	25484.4	73847.1	72928.2	71194	69691.1	72170	68026.8	62115.1	61159.1	60393	60830.1	58598	58397.4	7744.91	7764.99	7292.72	7430.23	7467.52	7879.83
KMW0571	Butyl caprate	Ester	C14H28O2	30673-36-0	25780.9	18965.1	11767.5	10598.6	13324.2	22655.3	55667.6	64941.6	68129.8	50458.2	53882.7	44351.2	33098.6	32949.4	34871.8	33086.5	39319.9	33097	17083.9	17866	15433	15919.5	11280.9	20548.6
XMW0643	Butyramide, 2-cyano-2-ethyl-	Amine	C7H12N2O	18705-38-9	3.7439e+06	3.82267e+06	3.96714e+06	3.73e+06	3.76819e+06	3.61006e+06	1.23083e+07	1.21206e+07	1.21866e+07	1.16597e+07	1.13799e+07	1.13983e+07	9.78542e+06	9.73445e+06	9.59485e+06	9.50565e+06	9.22972e+06	9.29198e+06	2.67775e+06	2.66095e+06	2.69026e+06	2.88131e+06	2.9553e+06	2.85104e+06
KMW0172	Camphene	Terpenoids	C10H16	79-92-5	834171	879820	966885	908382	903133	901116	3.54134e+06	3.04303e+06	3.34788e+06	3.48528e+06	3.48164e+06	3.78008e+06	2.98554e+06	3.15207e+06	3.03295e+06	2.94461e+06	2.72194e+06	3.01768e+06	490709	464815	524215	521165	562524	444139
XMW0385	Carotol	Terpenoids	C15H26O	465-28-1	168985	155871	165032	162640	156860	155446	422169	553780	401374	523491	406426	394516	338880	326883	327420	331645	357526	419985	56346	60381.1	53568.6	56523.8	56175.1	64772.2
KMW0388	Carveol	Terpenoids	C10H16O	99-48-9	63913.7	36411.7	36164.1	28988.5	40593	42031.7	231918	196797	273422	225949	193034	121241	171564	182776	187566	177855	204779	170385	29169.6	23133.2	19861.9	19865.5	23625.6	30657.8
KMW0643	Caryophyllene oxide	Terpenoids	C15H24O	1139-30-6	627159	502337	524732	471999	543786	541973	1.00779e+06	1.10701e+06	1.1082e+06	946624	939160	757111	838401	832038	847376	858344	937865	855392	261281	279677	219199	244988	204606	334926
NMW0081	Catechol	Phenol	C6H6O2	120-80-9	81575.7	103390	108293	99297.5	96367.3	91534.4	230549	199152	252025	226833	217118	139019	188956	201872	164530	185276	174576	158105	50491.4	49564.6	57858.9	54669.6	57613.1	45210.9
D348	Cyclobutaneethanol, 1-methyl-2-(1-methylethenyl)-, cis-	Alcohol	C10H18O	30820-22-5	346148	215541	222108	185552	251160	261788	1.14246e+06	929669	1.16116e+06	1.23867e+06	701632	517036	643119	666978	684071	630757	811767	663588	133878	120570	108226	113336	130728	158634
XMW0039	Cycloheptanone, 3-methyl-	Ketone	C8H14O	933-17-5	8984.15	8984.15	8984.15	8984.15	8984.15	8984.15	64829.7	58388.3	63558.3	62119	56138.4	61455.2	53024.8	54837.1	51963.9	51398.7	51067	50700	8984.15	8984.15	8984.15	8984.15	8984.15	8984.15
D440	Cyclohexanol, 1-methyl-4-(1-methylethyl)-, cis-	Terpenoids	C10H20O	3901-95-9	122088	131481	141191	103680	138030	118148	280780	319121	290769	270889	328702	302116	218789	225949	220759	223653	212555	207162	65771.8	206324	204110	101282	85421.4	225847
NMW0142*081	Cyclohexanol, 1-methyl-4-(1-methylethylidene)-, acetate	Ester	C12H20O2	10235-63-9	272097	265176	300561	265074	279326	261296	1.16431e+06	1.1857e+06	1.13474e+06	1.10861e+06	1.1313e+06	1.08699e+06	949446	958735	950508	941778	912827	915781	85474.1	83862.8	82218.8	82006.5	81355.7	86906.2
KMW0392*095	Cyclohexanol, 5-methyl-2-(1-methylethyl)-, (1.alpha.,2.alpha.,5.alpha.)-	Terpenoids	C10H20O	491-02-1	84329.5	92278.1	96692.4	85655.1	92551.1	92595.8	936675	925896	959324	902352	730489	816320	558929	704298	704637	584976	529873	559409	41284.1	38429.6	42999.3	41321	41536.3	40335.8
XMW0417	Cyclohexene, 4-methyl-1-(1-methylethenyl)-	Hydrocarbons	C10H16	586-67-4	4.29714e+06	4.29714e+06	4.29714e+06	4.29714e+06	4.29714e+06	4.29714e+06	5.45788e+07	5.25322e+07	5.22338e+07	5.33305e+07	4.93433e+07	5.01672e+07	3.14732e+07	4.02389e+07	3.10155e+07	3.08031e+07	3.62844e+07	2.96142e+07	4.29714e+06	4.29714e+06	4.29714e+06	4.29714e+06	4.29714e+06	4.29714e+06
XMW1379	Cyclooctane, 1,5-dimethyl-2,6-bis(methylene)-	Hydrocarbons	C12H20	74301-13-6	21548.6	19940.3	20401.9	14983.6	21485.9	18325.2	154303	158419	24172.8	139594	152238	89885.4	129867	127265	96483.1	98113.1	142073	82049.5	63041.3	62239.3	61826.7	66024.2	39222.4	49723.4
WMW0099	Cyclopentene, 1-butyl-	Hydrocarbons	C9H16	2423-01-0	725744	752374	854240	789318	802183	810554	2.60611e+06	2.34008e+06	2.4956e+06	2.61282e+06	2.26285e+06	2.39239e+06	2.24693e+06	2.35603e+06	2.32099e+06	2.21837e+06	2.43413e+06	2.22029e+06	236741	228787	251263	256489	274880	219146
XMW0954	Cyclopropanecarboxylic Acid, 2,2-dimethyl-3-(2-methyl-1-propenyl)-, (1R-trans)-	Terpenoids	C10H16O2	4638-92-0	7.40515e+06	7.50237e+06	7.69505e+06	7.36901e+06	7.36675e+06	7.19585e+06	2.60628e+07	2.56353e+07	2.55864e+07	2.4431e+07	2.34231e+07	2.38599e+07	1.9871e+07	1.995e+07	1.95855e+07	1.95439e+07	1.86503e+07	1.88508e+07	5.6696e+06	5.56624e+06	5.71983e+06	5.71477e+06	5.8224e+06	5.65925e+06
XMW0099	Decane, 2,3,5-trimethyl-	Hydrocarbons	C13H28	62238-11-3	107974	107974	774985	107974	107974	107974	1.14207e+06	1.03747e+06	1.18479e+06	813601	845345	874951	542451	539868	549170	670307	664267	540793	107974	107974	107974	107974	107974	107974
XMW0495	Dehydromevalonic lactone	Ester	C6H8O2	2381-87-5	7825.25	7825.25	44668.2	7825.25	7825.25	39126.3	126957	123024	122298	114981	111142	97314.3	99765.5	99387.1	93401.9	97983.1	97571.5	91039	42384.2	44267.3	48802	51698.8	40933.6	43474.4
XMW0131*143	Di-epi-.alpha.-cedrene	Terpenoids	C15H24	50894-66-1	199844	178339	218125	184383	195299	183185	411845	407125	401765	386677	391372	347803	311516	310797	303529	296163	297116	289194	129621	121590	122574	130844	98429.2	136216
WMW0084	DiSulfur compounds, bis(1-methylethyl)	Sulfur compounds	C6H14S2	4253-89-8	2058.69	1430.69	1104.25	1454.51	1957.69	1264.61	5637.68	4806.97	6086.8	6216.49	4110.78	4246.37	4559.33	5019.14	5104.21	4598.12	4480.58	4967.97	1810.68	220.85	1912.17	220.85	1787.66	1760.02
WMW0086	DiSulfur compounds, ethyl 1-methylethyl	Sulfur compounds	C5H12S2	53966-36-2	5.13408e+06	5.43566e+06	5.86724e+06	5.60374e+06	5.57245e+06	5.53218e+06	1.96739e+07	1.82053e+07	1.86474e+07	1.9255e+07	1.75153e+07	1.81396e+07	1.76743e+07	1.81682e+07	1.76863e+07	1.72009e+07	1.65853e+07	1.70896e+07	3.46571e+06	2.83477e+06	3.07221e+06	3.04864e+06	3.22719e+06	3.15257e+06
XMW0620	Dimethyl phthalate	Ester	C10H10O4	131-11-3	68897.2	59872.9	70731.6	62199.4	63027.1	62193.3	101308	71914.9	94232.9	68521.6	95097.7	82672.7	81139.7	83291.1	80889.6	75086.4	72637.2	69224.8	24925.2	24639.9	29638	38448.9	31603.4	25124.7
XMW0586	Dodecane, 5-methyl-	Hydrocarbons	C13H28	17453-93-9	8870.08	10596.9	8963.55	11551.3	11106.6	10317.2	17797.9	19231.3	18984.7	18876.7	19357.3	15614.9	16066.5	16696.5	15821	15362.1	20502.2	15404.7	4989.12	4722.39	4790.55	6718.83	7987.12	6945.32
NMW0779	Ethanol, 2,2'-oxybis-	Alcohol	C4H10O3	111-46-6	30660.7	33283.5	40384.1	33803.9	33535.5	31994.8	116893	112253	111015	116115	105312	108612	105884	108886	106652	103086	99444	103285	22065.3	18415.2	18084.5	20451.7	18848.1	17538.9
XMW1145	Ethanol, 2-(4-chlorophenyl)amino-	Alcohol	C8H10ClNO	2933-81-5	14434.2	12717.4	12534.5	12989.1	13127.5	12544.4	30097.7	25385.9	28754.9	24374.1	22756.1	23668.4	20218.6	20732.4	20478.6	18890.7	18680.1	18115.6	2506.9	2506.9	2506.9	2506.9	2506.9	2506.9
XMW0946	Ethanol, 2-(4-ethylphenoxy)-	Alcohol	C10H14O2	54411-10-8	2.32069e+07	2.26558e+07	2.46669e+07	2.28562e+07	2.29735e+07	2.27229e+07	4.85179e+07	4.79315e+07	4.64792e+07	4.68639e+07	4.61897e+07	3.99832e+07	4.14258e+07	4.11594e+07	4.05699e+07	3.85811e+07	3.79706e+07	3.67836e+07	4.53115e+06	4.53115e+06	4.53115e+06	4.53115e+06	4.53115e+06	4.53115e+06
XMW0914	Ethanone, 1-(1H-pyrazol-4-yl)-	Heterocyclic compound	C5H6N2O	25016-16-4	493127	415425	387006	333160	384913	380624	1.98706e+06	1.89443e+06	2.06221e+06	1.70271e+06	1.43615e+06	1.06791e+06	1.53755e+06	1.62454e+06	1.38045e+06	1.47983e+06	1.55607e+06	1.37754e+06	109694	121554	95812.3	101000	108797	145813
KMW0240	Ethanone, 1-(1H-pyrrol-2-yl)-	Heterocyclic compound	C6H7NO	1072-83-9	71164	71164	71164	71164	71164	71164	578229	467240	441864	553098	466297	433633	449625	445228	444330	442121	426746	427756	71164	71164	71164	71164	71164	71164
XMW0970	Ethanone, 1-(2,3,4-trihydroxyphenyl)-	Ketone	C8H8O4	528-21-2	2791.27	2743.94	3966.78	2909.87	3589.16	2797.54	7631.07	7115.73	7509.34	7095.78	6902.4	7417.87	6958.84	6930.85	6932.45	6689.49	6923.36	5050.55	1671.2	1693.99	1739.51	1654.12	1686.64	1711.58
XMW0177	Ethanone, 1-(2-methyl-1-cyclopenten-1-yl)-	Ketone	C8H12O	3168-90-9	56924.4	23388.7	25504.5	22538.6	23921	23106	162671	144921	158645	152763	135288	131176	140042	143360	137940	139602	136625	136027	11541.3	11521.4	11714.6	12772.7	13254	31596.8
XMW0717	Ethanone, 1-(2-methylphenyl)-	Ketone	C9H10O	577-16-2	119627	74716.2	75628.9	48380.9	85356.1	91141.7	400575	315560	389603	356221	237904	182193	214953	217859	231874	209751	215415	220434	25677.5	24153.6	26374.8	22722	31546.4	39882.8
XMW0830	Ethanone, 1-[4-(1-piperazinyl)phenyl]-	Heterocyclic compound	C12H16N2O	51639-48-6	24526.4	22443.4	24114.2	23477.9	22626.9	21781.5	74975.2	76619.9	71963.9	72669.3	72666.2	69089.2	49997.3	47908.3	46948	58264.6	60651.2	59137.3	8398.43	8783.01	7807.85	8073.04	8055.52	8896.77
XMW1204	Ethyl (methylthio)acetate	Ester	C5H10O2S	4455-13-4	3308.1	3545.98	4101.77	3721.49	3552.22	3423.49	13142.4	15703	12837.7	13132.4	12323.5	12732.9	10946.5	11201.7	14337.7	11149.8	10811.3	11008.6	2018.91	1942.14	2238.41	2262.78	2361.38	1884.13
XMW1305	Ethyl 5-methylhexanoate	Ester	C9H18O2	10236-10-9	18998.1	18998.1	18998.1	18998.1	18998.1	18998.1	194375	186003	184684	191667	175782	178095	156169	156353	153555	151828	141053	147865	18998.1	18998.1	18998.1	18998.1	18998.1	18998.1
XMW0607	Formic acid, 2-phenylethyl ester	Ester	C9H10O2	104-62-1	6176.34	3934.7	3966.23	3438.88	4577.9	4776.04	21161	17390.2	20417.9	22759.3	13172.7	10107	12170.4	12310.2	13423.2	11943.3	15477.6	12410.1	2535.4	2201.82	1487.93	2130.15	2409.97	2857.55
KMW0182	Furan, 2-pentyl-	Heterocyclic compound	C9H14O	3777-69-3	150290	159106	174457	169987	163846	165981	660249	583805	597180	644657	561944	578281	561882	566490	549485	543941	513605	538015	106201	102963	110138	107613	115712	98249.1
D181	Glycerin	Alcohol	C3H8O3	56-81-5	11109.3	11231.6	12329.5	11695.8	11207.8	11314.8	37533.6	36979	35851.7	37909.7	35627.2	35654.3	34585.1	35527.4	34563.3	34200.6	32692.4	34354.1	6468.83	7181.52	6518.09	7670.24	8151.93	5753.06
D84	Heptane, 1,1-dimethoxy-	Hydrocarbons	C9H20O2	10032-05-0	82953.5	82953.5	82953.5	82953.5	82953.5	82953.5	881343	847697	845615	852537	784478	811029	704598	704108	693539	679648	632081	664434	82953.5	82953.5	82953.5	82953.5	82953.5	82953.5
XMW0306	Heptanoic acid, methyl ester	Ester	C8H16O2	106-73-0	95800.3	95510.2	102121	88786.8	94888.3	95022	469445	413202	470762	533481	383705	380979	396878	410155	383237	385565	391061	362072	51202.8	51277	57783.8	58260.7	61286.2	50762.5
XMW0130	Heptanoic acid, octyl ester	Ester	C15H30O2	5132-75-2	108786	65642.4	68964.9	62312.9	72952	87713.2	144080	147244	158915	142219	141894	194575	130114	145553	142464	129882	123513	139775	38090.4	40875.8	34172.4	37499.3	36801.1	50978.9
D222	Hexanoic acid, 3-methyl-2-butenyl ester	Ester	C11H20O2	76649-22-4	144645	144645	144645	144645	144645	144645	3.18675e+06	3.07818e+06	3.11224e+06	3.00404e+06	2.89079e+06	2.6713e+06	2.58114e+06	2.57287e+06	2.51935e+06	2.45997e+06	2.40525e+06	2.32281e+06	144645	144645	144645	144645	144645	144645
XMW1232	Hydrazine, 1,1-bis(2-methylpropyl)-	Nitrogen compounds	C8H20N2	16596-38-6	9597.25	9729.9	10922.5	10401.5	9789.52	10199.4	27861.7	28019.1	27955	27701.3	27492.6	26661.4	26030.2	26533.2	26632.2	25929.6	24916.5	25639.7	6910.03	6567.45	5829.86	6014.41	6138.23	5513.1
XMW0141	Hydroperoxide, 1,4-dioxan-2-yl	Heterocyclic compound	C4H8O4	4722-59-2	67484.9	67760.4	74364.8	63789.4	67816.3	66774.1	336875	290979	339590	315401	270122	186214	213503	220922	202473	206213	209324	191188	37401.9	37550.5	42132.7	41303.4	46585.9	36916.4
NMW0265	Ibuprofen	Acid	C13H18O2	15687-27-1	33716.2	26722.2	28853.1	26411.6	29178.9	27658.4	86636.9	85624.8	86618.9	83565.3	81252.6	75654.6	44498.6	65243.2	96359.5	42456.2	28826.6	41790.5	9862.78	9737.68	9413.77	9892.18	9933.43	11896.8
XMW0770	Indane	Aromatics	C9H10	496-11-7	4.96881e+06	5.03126e+06	4.98661e+06	4.67669e+06	4.90505e+06	4.97992e+06	2.99572e+07	2.67084e+07	3.03724e+07	2.80003e+07	2.37849e+07	1.60111e+07	1.82128e+07	1.8871e+07	1.73158e+07	1.76296e+07	1.84857e+07	1.62868e+07	3.45632e+06	3.45978e+06	3.8859e+06	3.82382e+06	3.98192e+06	3.42344e+06
XMW0803	Iso-3-thujyl acetate	Ester	C12H20O2	62181-90-2	2.48688e+07	2.54295e+07	2.62995e+07	2.48615e+07	2.50194e+07	2.41101e+07	8.30634e+07	8.19897e+07	8.21014e+07	7.79637e+07	7.55825e+07	7.63253e+07	6.46319e+07	6.43473e+07	6.35233e+07	6.3049e+07	6.10093e+07	6.12801e+07	1.90622e+07	1.87332e+07	1.90524e+07	1.91151e+07	1.95982e+07	1.90057e+07
WMW0041	Isopinocarveol	Terpenoids	C10H16O	6712-79-4	144906	93502.2	96532.6	82605.2	106385	98682.9	462093	401553	546207	479580	323434	253394	280522	300215	300498	280775	271501	288923	59005.2	54894.6	41919.6	51909.9	49413.6	71633.4
NMW0071*144	L-.alpha.-Terpineol	Terpenoids	C10H18O	10482-56-1	1703.05	13770.4	14944.1	13664.1	14298.6	13969	58545.6	51102.4	57592.4	55643.2	56459.3	66194.3	44221.4	45792.8	46783.6	44800.9	38440.8	43077.7	10392.5	8705.19	9197.85	9442.12	8733.26	8515.24
XMW1491	Lavandulyl caproate	Ester	C16H28O2	59550-36-6	41866.6	41866.6	41866.6	41866.6	41866.6	41866.6	313259	327318	318639	298771	288815	264105	225965	234291	224613	214086	231708	209932	41866.6	41866.6	41866.6	41866.6	41866.6	41866.6
KMW0360*095	Levomenthol	Terpenoids	C10H20O	2216-51-5	84329.5	92278.1	96692.4	85655.1	92551.1	92595.8	936675	925896	959324	902352	730489	816320	558929	704298	704637	584976	529873	559409	41284.1	38429.6	42999.3	41321	41536.3	40335.8
KMW0324*031	Limonene oxide, cis-	Terpenoids	C10H16O	13837-75-7	18915.9	20136.2	22076.3	30272.1	20594.3	24096.3	84779.4	84605.7	83976.8	79224.8	79041.3	77458.8	68871.1	69911.6	64213.6	66214	65158.5	63164.2	18729.4	16892.7	18673.7	18594	17533.4	18743.8
WMW0008	Longifolene	Terpenoids	C15H24	475-20-7	62963.9	60269.3	64720.3	66124.1	60770.3	62079.7	98375.2	132577	88459.6	144003	133813	96106.4	104845	102251	100948	96242.3	95183.1	101322	12053.9	12053.9	12053.9	12053.9	12053.9	12053.9
D346	Methyl 6,6-dimethylbicyclo[3.1.1]hept-2-ene-2-carboxylate	Ester	C11H16O2	30649-97-9	1.78554e+06	1.81268e+06	1.86113e+06	1.78245e+06	1.78897e+06	1.73498e+06	6.32215e+06	6.22147e+06	6.21014e+06	5.91604e+06	5.68978e+06	5.78416e+06	4.84178e+06	4.83541e+06	4.76408e+06	4.74097e+06	4.5323e+06	4.58205e+06	1.36902e+06	1.34393e+06	1.38225e+06	1.37931e+06	1.40517e+06	1.36206e+06
KMW0503	Methyl anthranilate	Ester	C8H9NO2	134-20-3	21643.7	20262.1	21293.1	14343.7	21216	20255.2	69277	44397.8	65146.7	44770.2	43445.9	45341.8	33473.6	34076.1	42779.3	31148.9	30659.3	29386.5	10474.3	7820.34	7380.45	10289.4	8148.33	11386.5
KMW0421	Methyl salicylate	Ester	C8H8O3	119-36-8	53244.2	48500.5	49321.7	38868	51516.8	65752	249515	242433	255244	244715	241404	108312	174183	172812	171129	164816	270752	156015	24761	34122.3	32327.4	22107.3	33389	28613.1
WMW0158	Methylparaben	Ester	C8H8O3	99-76-3	3.30428e+06	3.3213e+06	3.16141e+06	3.27781e+06	3.18486e+06	3.38404e+06	8.93104e+06	8.64959e+06	8.6706e+06	8.41123e+06	8.32248e+06	6.02386e+06	5.87609e+06	5.86357e+06	5.84314e+06	5.6032e+06	5.64232e+06	5.84453e+06	1.50568e+06	1.34472e+06	1.35667e+06	1.45003e+06	1.50682e+06	1.52973e+06
XMW0112	Naphthalene, 1,2,4a,5,8,8a-hexahydro-4,7-dimethyl-1-(1-methylethyl)-, (1.alpha.,4a.beta.,8a.alpha.)-(.+/-.)-	Terpenoids	C15H24	5951-61-1	1.67035e+07	1.59164e+07	1.68977e+07	1.59268e+07	1.62815e+07	1.58922e+07	3.31917e+07	3.33646e+07	3.10428e+07	3.24774e+07	3.19219e+07	2.79667e+07	2.81831e+07	2.84965e+07	2.78463e+07	2.63999e+07	2.62601e+07	2.54457e+07	9.09333e+06	8.6759e+06	8.83126e+06	9.13969e+06	9.31851e+06	9.33828e+06
XMW1342	Naphthalene, 1,4-dimethyl-	Aromatics	C12H12	571-58-4	15473.6	15302.5	16407	15521	15449	15896.5	25549.9	25465.2	23281.2	24028	23658.1	22090.1	21128.9	21237.9	20303.4	19980.9	20240.7	18677.9	3060.5	3060.5	3060.5	3060.5	3060.5	3060.5
XMW1350	Naphthalene, 2,3,6-trimethyl-	Aromatics	C13H14	829-26-5	3014.26	3014.26	3014.26	3014.26	3014.26	3014.26	28779.8	28705.6	27330.1	27277.5	26489.4	25876.8	17536.2	17356.2	16356.9	15813.2	16183.4	15071.3	3014.26	3014.26	3014.26	3014.26	3014.26	3014.26
NMW0187	Nicotine, 1'-demethyl-, (.+/-.)-	Heterocyclic compound	C9H12N2	5746-86-1	180756	163871	183819	169362	173201	169699	250403	226976	243284	232095	233467	263384	234764	231167	232908	218130	221328	167642	71718.5	66695.3	66757.6	71118.4	74008.3	75456.3
KMW0137	Nonane	Hydrocarbons	C9H20	111-84-2	2537.87	2702.51	3204.49	2896.15	3047.71	3204.23	6634.17	5483.73	6780.32	7180.35	5362.22	5769.63	5054.56	5318.85	5346.23	5032.16	4312.04	4906.81	2159.28	2046.26	2290.36	1824.69	2529.39	2033.21
XMW0229	Nonanoic acid, 9-oxo-, methyl ester	Ester	C10H18O3	1931-63-1	18340	17229.7	18469.4	13932.9	17793	13100.1	29523	28698.2	27488.3	29396.5	29050.5	27697.3	25457.5	24932.5	25637.6	25376.8	25520.9	24792.9	2620.03	2620.03	2620.03	2620.03	2620.03	2620.03
XMW0604	Octane, 2,3,3-trimethyl-	Hydrocarbons	C11H24	62016-30-2	4211.02	4092.08	4375.78	3321.93	4166.49	3192.75	8579.19	7734.52	7568.93	7901.15	6889.46	7634.99	6384.35	6907.15	6718.99	7418.73	6847.17	6082.03	3095.02	3314.26	3006.52	3413.15	3057.51	3165.09
XMW1065	Octane, 2,6,6-trimethyl-	Hydrocarbons	C11H24	54166-32-4	14278.1	10586.7	12354.1	13408.1	11557.8	11346.5	36588.8	35506.4	35174.3	35990.4	34131.2	33243	34273.8	35747.2	34717.6	33119.6	32907.1	33111.4	10215.9	9593.45	8760.28	8407.88	11025.3	7918.59
D446	Octanoic acid, 2-furanylmethyl ester	Ester	C13H20O3	39252-03-4	3920.46	3135.01	2982.84	10055.7	11034.4	3587.21	30433.2	30777.6	33241.9	27318.6	28161	21493	18088.7	17182.1	17373	17435	20215.6	17621.2	9150.8	9710.3	8491.77	9105.93	7962.43	11792.5
KMW0232	Octanoic acid, methyl ester	Ester	C9H18O2	111-11-5	1590.79	1419.58	7294.43	6416.86	7036.33	6450.08	33722.1	22594	34426.6	30917.9	24573.1	16338	27214.7	27703.5	24571	25999.6	26352.7	23122.8	1476.93	1507.88	1409.95	1510.5	1502.93	1441.77
XMW0587	Octanoic acid-tert butyl ester	Ester	C12H24O2	5457-66-9	11610.8	13146.7	12742.8	2322.17	12038.2	11786.9	26702	25434.8	36416.1	35646.9	27099.5	26327.2	24692.7	30075.5	23497.9	28339.6	22266.6	22928.5	2322.17	2322.17	2322.17	2322.17	2322.17	2322.17
KMW0605	Pentanoic acid, 1-ethenyl-1,5-dimethyl-4-hexenyl ester	Ester	C15H26O2	10471-96-2	1.48873e+06	1.59416e+06	1.36587e+06	1.65133e+06	1.49862e+06	1.53294e+06	7.53518e+06	7.53154e+06	7.29026e+06	7.3788e+06	7.16096e+06	6.29917e+06	6.68405e+06	6.78446e+06	6.6472e+06	6.17469e+06	6.16562e+06	5.9613e+06	1.57342e+06	1.36289e+06	1.3642e+06	1.2903e+06	1.58851e+06	1.60424e+06
XMW1303	Pentanoic acid, 2-hydroxy-4-methyl-, ethyl ester	Ester	C8H16O3	10348-47-7	422773	422773	422773	422773	422773	422773	4.34753e+06	4.02454e+06	4.04316e+06	4.20971e+06	3.84611e+06	3.83256e+06	3.39771e+06	3.38369e+06	3.35436e+06	3.30763e+06	3.13969e+06	3.22455e+06	422773	422773	422773	422773	422773	422773
NMW0241	Pentylenetetrazol	Heterocyclic compound	C6H10N4	54-95-5	476199	476199	476199	476199	476199	476199	5.71712e+06	5.98819e+06	5.58131e+06	5.78067e+06	5.33841e+06	5.06167e+06	3.17138e+06	3.98866e+06	4.18699e+06	3.50309e+06	3.40232e+06	2.381e+06	476199	476199	476199	476199	476199	476199
KMW0364	Phenethyl mercaptan	Sulfur compounds	C8H10S	4410-99-5	20658.6	13672.1	8879.07	7281.19	15434.7	11974.1	70222.3	57762.3	80290.2	73944.7	29588	23283.8	41945.8	42250.6	45453.5	40604.2	41339.6	42454.8	8215.06	4814.64	4886.03	4681.85	5708.74	6420.51
KMW0175	Phenol	Phenol	C6H6O	108-95-2	375543	392268	419084	396669	397167	388799	1.30105e+06	1.22544e+06	1.2444e+06	1.28928e+06	1.18311e+06	1.21121e+06	1.18584e+06	1.22623e+06	1.19218e+06	1.15934e+06	1.1214e+06	1.15283e+06	223723	211332	223226	236439	230163	200168
KMW0382	Phenol, 2-methyl-	Phenol	C7H8O	95-48-7	552273	552273	552273	552273	552273	552273	5.67514e+06	5.22498e+06	5.26955e+06	5.44804e+06	4.99908e+06	4.9824e+06	4.41423e+06	4.39843e+06	4.35225e+06	4.29303e+06	4.1242e+06	4.18847e+06	552273	552273	552273	552273	552273	552273
NMW0226	Phenol, 3-nitro-	Phenol	C6H5NO3	554-84-7	109268	94288.2	112645	94891.9	101601	99225.4	242927	237306	233527	225304	224308	215379	201889	198231	194714	170408	172070	183474	64504.1	61138.4	59870.5	61691.1	64338.7	69119.3
KMW0703	Phenol, 4-ethyl-	Phenol	C8H10O	123-07-9	28381.6	26862	28415.9	23754.4	27081.6	23637.9	93781.8	90630.4	89261	84419.2	70379.2	56775.9	70638.8	67710.1	62336.6	66470.7	68438.1	64591.3	10088.9	10721.3	9470.95	10396.4	11120.6	12591.9
KMW0469	Phenol, 4-ethyl-2-methoxy-	Phenol	C9H12O2	2785-89-9	4.24279e+06	4.2449e+06	4.7394e+06	4.2401e+06	4.16544e+06	4.14862e+06	1.5789e+07	1.55023e+07	1.53743e+07	1.49041e+07	1.43852e+07	1.4602e+07	1.21608e+07	1.22874e+07	1.20005e+07	1.20053e+07	1.12517e+07	1.15549e+07	3.26173e+06	3.18914e+06	3.28832e+06	3.27844e+06	3.35113e+06	3.2649e+06
WMW0005	Pinocarvone	Terpenoids	C10H14O	30460-92-5	110819	147426	149727	127977	146913	128109	438311	426063	423295	392706	336096	244626	325111	319628	289052	307885	316579	294496	69724	71690.7	66359	68656.4	74434.7	78667.4
XMW0892	Propanediamide	Amine	C3H6N2O2	108-13-4	21573.5	19427.5	19701.5	17355.3	19521.6	18386.2	95682.4	84156.2	98569.4	88474.6	80447.6	54791.5	66254.8	66630.8	62580.8	64431.7	70485.5	57479.6	3471.07	3471.07	3471.07	3471.07	3471.07	3471.07
D240	Propanoic acid, 2,2-dimethyl-, pentyl ester	Ester	C10H20O2	2313-68-0	1.00191e+06	1.00191e+06	1.00191e+06	1.00191e+06	1.00191e+06	1.00191e+06	1.02166e+07	9.44602e+06	9.45563e+06	9.85917e+06	9.03218e+06	8.98523e+06	7.97228e+06	7.92426e+06	7.85928e+06	7.75062e+06	7.37114e+06	7.5549e+06	1.00191e+06	1.00191e+06	1.00191e+06	1.00191e+06	1.00191e+06	1.00191e+06
KMW0286	Pyrazine, 2-methoxy-3-(1-methylethyl)-	Heterocyclic compound	C8H12N2O	25773-40-4	5.07319e+06	5.07319e+06	5.07319e+06	5.07319e+06	5.07319e+06	5.07319e+06	4.1789e+07	3.90409e+07	3.65488e+07	3.98431e+07	3.71616e+07	3.69671e+07	2.53659e+07	4.07996e+07	3.00164e+07	3.1653e+07	3.73958e+07	3.10847e+07	5.07319e+06	5.07319e+06	5.07319e+06	5.07319e+06	5.07319e+06	5.07319e+06
D323*087	Pyrazine, 2-methyl-3-(methylthio)-	Heterocyclic compound	C6H8N2S	2882-20-4	964.783	149.691	149.691	1118.35	1094.94	1149.11	3864.85	3538.54	3535.27	3608.84	3453.14	3746.02	3184.89	3170.48	3316.01	3265.26	3006.88	3045.91	809.43	810.987	748.454	810.95	765.008	880.006
KMW0244	Pyrazine, 2-methyl-5-(1-methylethyl)-	Heterocyclic compound	C8H12N2	13925-05-8	1.37866e+07	1.37866e+07	1.37866e+07	1.37866e+07	1.37866e+07	1.37866e+07	1.35483e+08	1.24702e+08	1.29095e+08	1.29563e+08	1.18777e+08	1.20051e+08	1.05397e+08	1.05869e+08	1.03781e+08	1.0225e+08	1.00447e+08	9.9808e+07	1.37866e+07	1.37866e+07	1.37866e+07	1.37866e+07	1.37866e+07	1.37866e+07
D326*087	Pyrazine, 2-methyl-6-(methylthio)-	Heterocyclic compound	C6H8N2S	2884-13-1	964.783	149.691	149.691	1118.35	1094.94	1149.11	3864.85	3538.54	3535.27	3608.84	3453.14	3746.02	3184.89	3170.48	3316.01	3265.26	3006.88	3045.91	809.43	810.987	748.454	810.95	765.008	880.006
XMW0651	Pyridine, 2,3-dimethyl-	Heterocyclic compound	C7H9N	583-61-9	306298	326889	356361	335351	332586	330494	1.47592e+06	1.31538e+06	1.39769e+06	1.46162e+06	1.26637e+06	1.40837e+06	1.2563e+06	1.32369e+06	1.26056e+06	1.21681e+06	1.1408e+06	1.26091e+06	180243	172487	194002	193066	208222	165001
NMW0185	Pyridine, 3-(3,4-dihydro-2H-pyrrol-5-yl)-	Heterocyclic compound	C9H10N2	532-12-7	1.00494e+06	959229	1.02736e+06	955554	985784	956952	2.09945e+06	2.08802e+06	2.02184e+06	2.07212e+06	2.03181e+06	1.78682e+06	1.7982e+06	1.81843e+06	1.77173e+06	1.7162e+06	1.70342e+06	1.59853e+06	191111	191111	191111	191111	191111	191111
XMW0522	Pyridine, 3-propyl-	Heterocyclic compound	C8H11N	4673-31-8	538931	574442	646200	616698	595354	591502	2.65609e+06	2.39623e+06	2.4186e+06	2.60252e+06	2.28687e+06	1.45506e+06	2.26918e+06	2.30608e+06	2.23718e+06	2.17981e+06	2.08243e+06	2.16064e+06	319496	305347	338618	343767	369754	300089
NMW0125	Salicylic Acid	Acid	C7H6O3	69-72-7	574969	576638	638784	572251	566949	558908	2.1685e+06	2.12179e+06	2.11932e+06	2.04683e+06	1.95882e+06	2.01085e+06	1.66129e+06	1.67884e+06	1.64804e+06	1.64209e+06	1.55881e+06	1.59446e+06	449043	441923	453366	449569	461071	451335
WMW0022	Salvial-4(14)-en-1-one	Terpenoids	C15H24O	73809-82-2	223583	112210	116781	105412	122921	130062	513738	537719	571277	480269	484672	340730	250954	285938	306311	260831	350701	268984	130228	139574	115549	119991	107921	170628
XMW0885*009	Santolina triene	Hydrocarbons	C10H16	2153-66-4	20029	23639.3	26531.5	16007.6	24281.2	16870.2	53535.5	38786.6	49859.3	50136.5	70212.9	49352.4	45781.9	51243.3	48837.7	47611.7	39129.5	49169.4	10216.8	6359.17	7475.79	7630.38	7950.79	9612.68
D438	Sesquirosefuran	Heterocyclic compound	C15H22O	39007-93-7	301958	301958	301958	301958	301958	301958	3.27397e+06	2.53814e+06	3.21774e+06	2.64564e+06	2.99946e+06	3.08664e+06	2.57977e+06	2.46156e+06	2.46437e+06	2.03761e+06	2.94005e+06	2.45287e+06	301958	301958	301958	301958	301958	301958
KMW0277	Thiophene, 2-pentyl-	Heterocyclic compound	C9H14S	4861-58-9	325913	203249	211685	174705	236500	247812	1.12783e+06	950957	1.17365e+06	1.21421e+06	712113	515824	659614	693405	700054	645341	637024	676420	124599	112354	99522	106279	122372	150146
KMW0488	Tridecane	Hydrocarbons	C13H28	629-50-5	3.20004e+06	2.8564e+06	3.24853e+06	2.31797e+06	3.05302e+06	2.42133e+06	5.92289e+06	5.43807e+06	5.62959e+06	5.68724e+06	5.59948e+06	4.29753e+06	5.18243e+06	5.17719e+06	5.00098e+06	4.6854e+06	4.80066e+06	4.4106e+06	1.84429e+06	1.73669e+06	1.76848e+06	1.85206e+06	1.89407e+06	1.92029e+06
XMW0258	Tridecane, 2-methyl-	Hydrocarbons	C14H30	1560-96-9	9698.03	8100.35	8630.38	7918.53	8655.47	8919.91	25859.1	26793.1	24822.8	24007.1	21460	24680.6	21114.9	23728.2	22708.6	23230.6	23907.6	25808.8	6429.13	8232.57	6748.72	7766.85	7574.15	8857.16
KMW0485	Undecanoic acid, ethyl ester	Ester	C13H26O2	627-90-7	855.134	855.134	855.134	855.134	855.134	855.134	12371.5	14315.1	11357.5	11881.5	11939.6	20476.6	6959.85	7322.5	6962.39	7058.91	6026.78	5670.45	855.134	855.134	855.134	855.134	855.134	855.134
D422	Undecanol-5	Alcohol	C11H24O	37493-70-2	4.43728e+06	4.5296e+06	4.71337e+06	4.434e+06	4.47217e+06	4.28936e+06	1.38419e+07	1.36214e+07	1.36229e+07	1.31701e+07	1.28991e+07	1.28921e+07	1.10824e+07	1.10371e+07	1.08821e+07	1.07702e+07	1.04591e+07	1.05324e+07	3.18151e+06	3.1557e+06	3.19696e+06	3.14939e+06	3.21982e+06	3.1386e+06
KMW0519	Vanillin	Aldehyde	C8H8O3	121-33-5	34264.7	34376	29187.7	27600.7	32770.4	46048.8	90726.1	104445	95651.6	96645.8	93974.9	91660.4	64926.7	62868.5	85488.5	75523.2	80757	101720	12184	16777	9925.21	11457.8	6762.95	16378.1
XMW0202	cis-2,6-Dimethyl-2,6-octadiene	Hydrocarbons	C10H18	2492-22-0	10050	9596.39	11474	10516.8	11124.9	11348.1	24586.2	22305.1	23653.5	25804.2	22582.2	22031.7	19147.8	19621.8	19000.1	19070.5	19333.3	15182.2	9745.19	9101.47	8425.43	8363.04	8878.91	8970.09
XMW0217	cis-7-Decen-1-al	Aldehyde	C10H18O	21661-97-2	26200	24541.2	26234.6	17689.2	27254.2	21192.7	65650.2	71833	71213.4	60730	72299	68023.6	51638.9	49923.9	53788.7	51213.6	56866.6	48311.6	18112.6	17218.1	17065.7	16565.2	14931.9	18588.9
XMW0913	cis-Chrysanthenol	Terpenoids	C10H16O	55722-60-6	116489	118434	120029	100345	114661	101200	307344	305751	284665	275896	228367	159746	233058	225131	201413	215232	227465	207285	39442.6	40846.3	34566.7	36657.3	43960.9	49583
KMW0389*092	endo-Borneol	Terpenoids	C10H18O	507-70-0	299924	319477	336731	282034	319466	332601	1.96676e+06	1.83543e+06	1.96638e+06	1.80615e+06	1.48085e+06	1.54688e+06	1.56532e+06	1.32122e+06	1.33751e+06	1.38906e+06	1.60719e+06	1.24981e+06	645017	622384	656278	711441	514945	606360
D347	n-Capric acid isobutyl ester	Ester	C14H28O2	30673-38-2	106668	106668	106668	106668	106668	106668	760720	614324	751090	638110	705385	718304	664223	623111	631384	702773	689027	533342	106668	106668	106668	106668	106668	106668
XMW1400	n-Pentyl methylphosphonofluoridate	Others	C6H14FO2P	13454-59-6	4449.15	4567.99	4577.72	3570.1	3478.58	4708.45	44980.7	17039.2	42066.4	43271.9	40224.3	15569.1	32165.4	30434.3	30612.5	31177.8	30743.9	30469.9	695.717	695.717	695.717	695.717	695.717	695.717
XMW0127*016	o-Cymene	Terpenoids	C10H14	527-84-4	3.96988e+07	4.02233e+07	4.08924e+07	3.73058e+07	3.9143e+07	3.96288e+07	2.33673e+08	2.10227e+08	2.35887e+08	2.18516e+08	1.97428e+08	1.26585e+08	1.46679e+08	1.51378e+08	1.40373e+08	1.42382e+08	1.49015e+08	1.31446e+08	2.80261e+07	2.80615e+07	3.14896e+07	3.09776e+07	3.22746e+07	2.7786e+07
KMW0508	p-Cymen-7-ol	Alcohol	C10H14O	536-60-7	1.02908e+06	1.06561e+06	1.06064e+06	1.0838e+06	1.03324e+06	109786	2.72573e+06	2.62558e+06	4.8169e+06	2.53166e+06	2.61982e+06	2.55768e+06	2.79629e+06	2.67044e+06	2.69564e+06	2.6014e+06	2.69397e+06	2.67931e+06	112423	111969	119946	114579	111292	108011
KMW0234*094	p-Cymene	Aromatics	C10H14	99-87-6	1.32542e+07	1.34414e+07	1.83254e+07	1.26714e+07	1.36987e+07	1.33527e+07	8.64142e+07	7.67041e+07	8.71659e+07	7.96929e+07	6.60523e+07	4.51255e+07	4.55322e+07	5.34439e+07	4.27815e+07	4.41664e+07	4.56166e+07	4.05051e+07	9.79813e+06	9.83232e+06	1.10075e+07	9.44435e+06	9.73587e+06	9.77909e+06
NMW0060	p-Menth-8-en-1-ol, stereoisomer	Terpenoids	C10H18O	7299-40-3	34568.9	36921.7	43123	35104.5	35719.6	35015.4	161122	151840	159571	148134	151874	152369	125880	79813.6	126779	84273.8	127483	75187.2	56629.8	48370.9	51093.5	43256.3	40082.6	54593.5
XMW0530	p-Mentha-1,5-dien-8-ol	Terpenoids	C10H16O	1686-20-0	35973.6	22855.5	37360.4	21060.7	35467.5	22870.5	155352	135839	176529	138112	144091	121607	137396	134704	130396	134622	134907	128117	22296.6	35232.9	33919.7	35452.3	33310.4	35742.9
D193*131	p-Mentha-1,8-dien-7-ol	Terpenoids	C10H16O	536-59-4	1.26371e+06	1.29151e+06	1.34523e+06	1.2625e+06	1.274e+06	1.22206e+06	4.01731e+06	3.93926e+06	3.93963e+06	3.80979e+06	3.72556e+06	3.7366e+06	3.19493e+06	3.1828e+06	3.13191e+06	3.1018e+06	2.99594e+06	3.02377e+06	890765	886861	900574	888045	908458	884597
NMW0123	p-Menthane-3,8-diol, cis-1,3,trans-1,4-	Terpenoids	C10H20O2	3564-98-5	4.0309e+06	4.1037e+06	4.26795e+06	4.00822e+06	4.05216e+06	3.87817e+06	1.32165e+07	1.30171e+07	1.29721e+07	1.25084e+07	1.21944e+07	1.22777e+07	1.04286e+07	1.03846e+07	1.02497e+07	1.01282e+07	9.82166e+06	9.91033e+06	2.88541e+06	2.86631e+06	2.90153e+06	3.08425e+06	3.17596e+06	3.05246e+06
D170	p-Tolyl isobutyrate	Ester	C11H14O2	103-93-5	6196.06	6268.12	6688.01	6625.1	6209.58	6071.75	21305.3	21218.8	20648.9	20501.8	19479.2	20003.2	16773.4	17329.9	16655.2	16908.1	15897.8	16539.7	4276.56	4336.55	4306.67	3495.05	4948.07	4437.25
XMW1092	spiro[3-oxatricyclo[3.3.1.02,4]nonane-8,1'-cyclopropane]-6-one	Ketone	C10H12O2	109637-57-2	305299	274032	279410	228466	282177	371113	1.51682e+06	1.55746e+06	1.59926e+06	1.47931e+06	1.4745e+06	904721	1.11267e+06	1.45885e+06	1.04939e+06	1.35936e+06	1.55188e+06	968365	149874	194772	187289	186564	191479	160077
KMW0355	trans,cis-2,6-Nonadien-1-ol	Alcohol	C9H16O	28069-72-9	122020	118639	121388	104554	118102	105979	371249	350128	358442	333677	289614	227427	274817	269462	251896	265283	271519	253485	54381.7	56933.8	51998.5	55053.7	58546.6	60014.4
WMW0046	trans-2-Undecen-1-ol	Alcohol	C11H22O	75039-84-8	5154.59	4721.37	5187.98	5098.43	5000.75	5015.65	9805.07	9916.72	9723.72	8934.41	9192.3	9792.44	8562.22	7931	8294.8	7680.25	8050.2	9376.13	3109.67	3976.32	3260.75	5103.93	4925.34	4065
KMW0480*050	trans-Geranic acid methyl ester	Terpenoids	C11H18O2	1189-09-9	687975	674562	739282	700858	683501	683514	3.3022e+06	3.21027e+06	3.21012e+06	3.13948e+06	3.04425e+06	3.11666e+06	3.20648e+06	3.16549e+06	3.17284e+06	3.14393e+06	2.0629e+06	3.10954e+06	264033	252646	256238	221905	282770	228551
NMW0204	trans-O-Dithiane-4,5-diol	Heterocyclic compound	C4H8O2S2	14193-38-5	2824.32	2717.63	2469.88	2561.3	2547.73	2638.67	7475.79	7211.82	7365.96	6838.13	6828.96	5361.3	6627.87	6545.84	6928.41	6490.31	5326.61	5193.68	1199.53	1068.75	1344.9	1113.17	1072.99	1748.71
D177	(1aR,1bS,2aS,5S,5aS,7aS)-2,2,5,7a-Tetramethyldecahydrocyclopenta[2',3']cyclobuta[1',2':3,4]benzo[1,2-b]oxirene	Terpenoids	C15H24O	104188-24-1	1.56129e+06	1.37135e+06	1.58016e+06	1.38171e+06	1.49272e+06	1.39202e+06	186997	186997	186997	186997	186997	186997	186997	186997	186997	186997	186997	186997	969388	947506	934985	953984	983788	997496
XMW0082	(R)-(-)-2-Pyrrolidinemethanol	Heterocyclic compound	C5H11NO	68832-13-3	70040.9	70945	78070	70800	71584.5	70420.9	9344.99	9344.99	9344.99	9344.99	9344.99	9344.99	9344.99	9344.99	9344.99	9344.99	9344.99	9344.99	48909.1	46884.3	48407.9	49347.9	50957.8	46725
KMW0684	.delta.-Dodecalactone	Ester	C12H22O2	713-95-1	35073.2	30839.2	28492.2	30796.6	33352.4	39937.2	14450.2	19252.4	16033.8	14849.4	13206.9	15538.1	11907.4	13054.9	14992.2	13126.4	14928.8	16055.3	12785.9	19425	14100.3	18062.2	15099.7	21071.1
XMW0448	1,2,4,5-Tetrazine-3,6-diAmine	Heterocyclic compound	C2H4N6	19617-90-4	17318.2	16435	17737.2	17840.1	18306.8	16931.7	10962.4	11710.4	11423.2	2192.48	2192.48	2192.48	2192.48	2192.48	2192.48	2192.48	2192.48	2192.48	11859	16147.5	12708.7	14275.7	13806.2	14598.5
KMW0252*154	1,3,7-Octatriene, 3,7-dimethyl-	Terpenoids	C10H16	502-99-8	8.06525e+07	8.23506e+07	8.31714e+07	8.17587e+07	8.1763e+07	8.12613e+07	1.04086e+07	1.04086e+07	1.04086e+07	1.04086e+07	1.04086e+07	1.04086e+07	1.04086e+07	1.04086e+07	1.04086e+07	1.04086e+07	1.04086e+07	1.04086e+07	5.56597e+07	5.2043e+07	5.60455e+07	5.6457e+07	5.82393e+07	5.22472e+07
KMW0479*140	1,3-Cyclohexadiene-1-carboxaldehyde, 2,6,6-trimethyl-	Terpenoids	C10H14O	116-26-7	952212	941820	883416	897011	909059	885935	112760	112760	112760	112760	112760	112760	112760	112760	112760	112760	112760	112760	797135	811609	781388	822555	792764	818920
XMW0809	1,3-Pentanedione, 4,4-dimethyl-1-phenyl-	Ketone	C13H16O2	13988-67-5	8380.63	12193.1	16248.6	14184.6	13203.8	7289.7	1339.41	1339.41	1339.41	1339.41	1339.41	1339.41	1339.41	1339.41	1339.41	1339.41	1339.41	1339.41	6827.04	7514.62	6761.24	6746.33	6697.04	8107.8
XMW1295	1,6-HexanediAmine, N,N,N',N'-tetramethyl-	Amine	C10H24N2	111-18-2	113.963	113.963	113.963	113.963	113.963	113.963	113.963	113.963	113.963	113.963	113.963	113.963	569.813	113.963	113.963	113.963	113.963	113.963	465094	432102	446353	443041	445590	477238
XMW0793	1,7-Octadiene, 2,7-dimethyl-3,6-bis(methylene)-	Hydrocarbons	C12H18	16714-60-6	1.72861e+07	1.73972e+07	1.96198e+07	1.68997e+07	1.6968e+07	1.71808e+07	1.67842e+06	1.67842e+06	1.67842e+06	1.67842e+06	1.67842e+06	1.67842e+06	1.67842e+06	1.67842e+06	1.67842e+06	1.67842e+06	1.67842e+06	1.67842e+06	8.39209e+06	8.67333e+06	8.50868e+06	8.58659e+06	8.92897e+06	8.6138e+06
XMW0783	1-Adamantanol	Alcohol	C10H16O	768-95-6	145083	132559	152474	128743	145586	120539	8146.19	8146.19	8146.19	8146.19	8146.19	8146.19	8146.19	8146.19	8146.19	8146.19	184573	8146.19	58548.3	58554.2	44442.7	40730.9	57250.4	78791.5
XMW0470	1-ButanAmine, N-(2-pyridinylmethylene)-	Heterocyclic compound	C10H14N2	7032-24-8	25152.8	21150.5	15827.4	20869.1	24238.2	22220	1989.01	1989.01	1989.01	1989.01	1989.01	1989.01	1989.01	1989.01	1989.01	1989.01	1989.01	18066.4	11172	9957.57	9945.03	11751.3	12516.8	11883.1
XMW0490	1-Methyl-2-phenylcyclopropane	Aromatics	C10H12	3145-76-4	1.30306e+06	1.32117e+06	1.47074e+06	1.40959e+06	1.39908e+06	1.29065e+06	180874	180874	180874	180874	180874	180874	180874	180874	180874	180874	180874	180874	938027	908737	939016	947792	980182	904370
NMW0235	1-NaphthalenecarboxAldehyde	Aldehyde	C11H8O	66-77-3	6706.83	7826.59	6564.46	7665.97	8426.96	8105	1079.91	1079.91	1079.91	1079.91	1079.91	1079.91	1079.91	1079.91	1079.91	1079.91	1079.91	1079.91	6140.42	5538.14	5399.54	5713.64	6346.51	6141.06
XMW1308	1-Octyl trifluoroacetate	Ester	C10H17F3O2	2561-21-9	2670.45	2644.96	2958.24	2677.36	2846.74	2744.61	317.19	317.19	317.19	317.19	317.19	317.19	317.19	317.19	317.19	317.19	317.19	317.19	1627.17	1585.95	1600.19	1887.54	1845.18	1720.81
WMW0130	1-Pentadecene	Hydrocarbons	C15H30	13360-61-7	5274.82	4821.19	5394.43	5028.85	5027.1	4900.81	964.238	964.238	964.238	964.238	964.238	964.238	964.238	964.238	964.238	964.238	964.238	964.238	6250.09	5880.53	6009.01	6113.14	6485.47	6598.6
XMW0087	1-Pentanone, 1-(p-anisyl)-3-methyl-	Ketone	C13H18O2	66333-82-2	2.85938e+06	2.23552e+06	2.76422e+06	1.91422e+06	2.82335e+06	1.86671e+06	292460	292460	292460	292460	292460	292460	292460	292460	292460	292460	292460	292460	1.57497e+06	1.6131e+06	1.6674e+06	1.56293e+06	1.50917e+06	1.4623e+06
XMW0441	1H-1,2,4-Triazole, 3-chloro-	Heterocyclic compound	C2H2ClN3	6818-99-1	110576	108055	112051	115611	116936	118112	92905.6	68126.5	87853.8	84290.4	82327	83318.3	13625.3	13625.3	13625.3	13625.3	13625.3	13625.3	88376.3	107163	104320	105385	88652.6	106653
XMW0644	1H-Imidazole, 2-propyl-	Heterocyclic compound	C6H10N2	50995-95-4	91089.6	91123.7	87560.5	88488.6	89848.5	82074.2	62367.5	52972.9	73651.6	51224.7	42739.5	46044.8	8547.89	8547.89	8547.89	8547.89	8547.89	8547.89	73931.9	72841.8	71856.5	75681.6	73086.3	75517
XMW0532	1H-Pyrazole-1-carboximidamide, 3,5-dimethyl-	Heterocyclic compound	C6H10N4	22906-75-8	1.1624e+06	1.14928e+06	1.25474e+06	1.08925e+06	1.13967e+06	1.07764e+06	917825	793431	916245	761177	681761	707610	136352	136352	136352	136352	136352	136352	969322	1.00552e+06	974289	1.00475e+06	982825	985593
XMW0123	1H-Pyrrole-2,5-dione	Heterocyclic compound	C4H3NO2	541-59-3	16787.6	15546.6	15606.6	13598.7	14577.3	16418.5	9850.11	7728.01	10157	9008.89	7657.24	8953	7396.59	7298.19	7176.91	7079.93	6309.42	7592.85	9379.05	10141.1	10933.9	10919.8	11397.7	10844.3
NMW0007*140	2,4-Cycloheptadien-1-one, 2,6,6-trimethyl-	Terpenoids	C10H14O	503-93-5	952212	941820	883416	897011	909059	885935	112760	112760	112760	112760	112760	112760	112760	112760	112760	112760	112760	112760	797135	811609	781388	822555	792764	818920
WMW0078	2,4-Di-tert-butylphenol	Phenol	C14H22O	96-76-4	184565	165006	190225	154856	186591	175378	26054.3	26054.3	26054.3	26054.3	26054.3	26054.3	26054.3	26054.3	26054.3	26054.3	26054.3	26054.3	133143	139291	130271	136747	136324	176162
KMW0601	2-Butanone, 4-(4-hydroxyphenyl)-	Ketone	C10H12O2	5471-51-2	1137.65	6637.87	1137.65	6156.91	5688.25	5950.59	1137.65	1137.65	1137.65	1137.65	1137.65	1137.65	1137.65	1137.65	1137.65	1137.65	1137.65	1137.65	7108.8	7659.44	8004.8	7231.38	5897.93	6024.57
XMW0713	2-Cyclohexen-1-one, 3-methyl-	Ketone	C7H10O	1193-18-6	1.9801e+06	1.94472e+06	1.54917e+06	1.58197e+06	1.93411e+06	1.87922e+06	230021	230021	230021	230021	230021	230021	230021	230021	230021	230021	230021	230021	1.40205e+06	1.36777e+06	1.38475e+06	1.42091e+06	1.46592e+06	1.41483e+06
KMW0260	2-Cyclopenten-1-one, 2-hydroxy-3,4-dimethyl-	Ketone	C7H10O2	21835-00-7	234957	236984	243090	237897	239294	224824	33466.5	33466.5	33466.5	33466.5	33466.5	33466.5	33466.5	33466.5	33466.5	33466.5	33466.5	33466.5	216233	213276	214356	220006	221869	221175
XMW0462	2-Cyclopenten-1-one, 3-methyl-2-(2-pentenyl)-, (Z)-	Ketone	C11H16O	488-10-8	9220.31	7511.16	8653.45	7354.78	7494.74	7001.83	17775.8	17564.7	16672.4	16784.8	16369.2	13439.5	22470.3	21416.1	21450.3	19255.6	19648.5	18584.4	3.75824e+06	3.61097e+06	3.87943e+06	3.86201e+06	3.97667e+06	3.62021e+06
D226	2-Dodecanone	Ketone	C12H24O	6175-49-1	5589.81	5589.81	5589.81	5589.81	5589.81	5589.81	31434.7	27949	29033.9	28666.7	28439.6	28410.8	35363.6	35417.1	33927.6	33242.4	33302.9	30973.2	180080	172433	181265	182217	191319	174026
D296*020	2-Ethyl-3-methoxypyrazine	Heterocyclic compound	C7H10N2O	25680-58-4	290633	288052	333981	316257	312912	284575	34904.6	34904.6	34904.6	34904.6	34904.6	34904.6	34904.6	34904.6	34904.6	34904.6	34904.6	34904.6	178926	174980	177471	174523	209595	179188
KMW0207	2-Furanmethanethiol, 5-methyl-	Heterocyclic compound	C6H8OS	59303-05-8	158801	157354	149952	161718	145124	160172	94934.2	75177.8	89114.8	86337.4	70613.7	83022.2	78011.7	77382.9	72638.4	77122.5	59733.6	73306	107407	117727	126555	128250	133092	106025
XMW1397	2-Methylindene	Aromatics	C10H10	2177-47-1	17104.2	16775	17056.1	17775.5	16502.4	16751.8	2322.24	2322.24	2322.24	2322.24	2322.24	2322.24	2322.24	2322.24	2322.24	2322.24	2322.24	2322.24	12354.3	12204.7	11949.6	12184.5	12512.2	11611.2
XMW1218	2-Nonanone, 3-(hydroxymethyl)-	Ketone	C10H20O2	67801-33-6	58765.2	58455.3	57613.8	56099	58022.7	57123.2	40670.7	38518.5	34625.4	39911.5	34227	35496.8	6845.4	6845.4	6845.4	6845.4	6845.4	6845.4	50906.3	52366.1	50001.1	51910.7	51187.8	52031.8
D158	2-Phenoxyethyl isobutyrate	Ester	C12H16O3	103-60-6	144315	123459	122502	126871	128007	128149	120642	116107	117574	111443	107536	97258.2	66205.2	64814.8	62434	59371.6	42845.9	44983.8	289650	280987	283072	292636	299694	297620
XMW1335	3,4-Hexanedione, 2,2,5-trimethyl-	Ketone	C9H16O2	20633-03-8	40908.1	40123	41027.4	40504.7	40403.4	40133	4794.79	4794.79	4794.79	4794.79	4794.79	54649.1	4794.79	4794.79	4794.79	4794.79	4794.79	4794.79	24881.6	24120.9	24954.6	24522.6	23973.9	24540.1
XMW0900	3-Cyclohexen-1-one, 3,5,5-trimethyl-	Ketone	C9H14O	471-01-2	50453.9	50491.9	48170.7	52225.6	47003.2	50166.5	25559.6	20704.9	25339.5	22102.4	19034	22481.3	20256.6	21298.9	19460	20605.8	15889.2	19616.8	32039.1	33545.9	36471.8	36755.5	39083.1	30246.2
D425	3-Cyclohexene-1-carboxAldehyde, 4-(4-methyl-3-pentenyl)-	Aldehyde	C13H20O	37677-14-8	7.53678e+06	8.80118e+06	9.96397e+06	8.60413e+06	8.05811e+06	8.3966e+06	1.27515e+06	1.27515e+06	1.27515e+06	1.27515e+06	1.27515e+06	1.27515e+06	1.27515e+06	1.27515e+06	1.27515e+06	1.27515e+06	1.27515e+06	1.27515e+06	6.64657e+06	6.46636e+06	6.37573e+06	6.53975e+06	6.66502e+06	6.70067e+06
D340	3-Hexanone, 1-phenyl-	Ketone	C12H16O	29898-25-7	3.14873e+07	3.02556e+07	3.29214e+07	3.04713e+07	3.09921e+07	3.02792e+07	3.28626e+06	3.28626e+06	3.28626e+06	3.28626e+06	3.28626e+06	3.28626e+06	3.28626e+06	3.28626e+06	3.28626e+06	3.28626e+06	3.28626e+06	3.28626e+06	1.70722e+07	1.64313e+07	1.66192e+07	1.70381e+07	1.74717e+07	1.73733e+07
KMW0255*020	3-Methoxy-2,5-dimethylpyrazine	Heterocyclic compound	C7H10N2O	19846-22-1	290633	288052	333981	316257	312912	284575	34904.6	34904.6	34904.6	34904.6	34904.6	34904.6	34904.6	34904.6	34904.6	34904.6	34904.6	34904.6	178926	174980	177471	174523	209595	179188
NMW0161	3-Phenyl-1-propanol, acetate	Ester	C11H14O2	122-72-5	60532.7	60532.7	60532.7	60532.7	60532.7	60532.7	60532.7	60532.7	60532.7	60532.7	60532.7	60532.7	60532.7	60532.7	60532.7	60532.7	60532.7	60532.7	951701	903355	980128	975754	1.01819e+06	911973
D133	4-Heptanol, 2,6-dimethyl-, acetate	Ester	C11H22O2	10250-45-0	304061	283580	263555	250060	263092	261264	48778.1	48373.4	50259.4	46237.6	8267.4	41337	61182.4	61134.5	64838.7	68006.6	50415.9	64983.1	134916	133570	138956	134161	138906	134150
XMW0290	4-Heptanone, oxime	Amine	C7H15NO	1188-63-2	11469.1	12275.3	13046.4	12496.4	12125.3	11859.1	1596.05	1596.05	1596.05	1596.05	1596.05	1596.05	1596.05	1596.05	1596.05	1596.05	1596.05	1596.05	8293.94	7980.27	8096.58	8452.76	8496.93	8117.89
D375	4H-Inden-4-one, 1,2,3,5,6,7-hexahydro-1,1,2,3,3-pentamethyl-	Ketone	C14H22O	33704-61-9	354189	447280	386098	392825	363662	355082	55417	55417	55417	55417	55417	55417	55417	55417	55417	55417	55417	55417	298279	334330	294844	308325	290758	330547
KMW0176	5-Hepten-2-one, 6-methyl-	Ketone	C8H14O	110-93-0	107983	174043	187010	184139	80378.9	77308.8	66819.6	59476	88634.5	64816.3	7484.01	7484.01	7484.01	7484.01	7484.01	7484.01	7484.01	7484.01	92343.5	106927	107822	110034	113407	62677.5
XMW1130	6-bromo-2-Hexanone	Ketone	C6H11BrO	10226-29-6	27714.4	26017.9	4577.72	27460.9	27394.3	27195.1	915.545	915.545	915.545	915.545	915.545	915.545	915.545	915.545	915.545	915.545	915.545	915.545	24692.5	25287.6	24794.9	25848	26442.5	25426.3
D316	Adamantane	Hydrocarbons	C10H16	281-23-2	209791	226370	240150	185902	232965	209199	26690.4	26690.4	26690.4	26690.4	26690.4	26690.4	26690.4	26690.4	26690.4	26690.4	26690.4	26690.4	144791	135595	133452	140396	151769	146654
NMW0316	Amobarbital	Heterocyclic compound	C11H18N2O3	57-43-2	9587.04	8468.97	8439.87	7876.01	8022.63	7931	5683.01	6100.05	5498.3	5596.22	5546.16	5241.28	3701.51	3875.48	3705.33	3571.5	3535.02	3626.96	5273.18	5314.4	5100.49	4874.22	4726.73	5819.51
NMW0115*091	Anethole	Aromatics	C10H12O	104-46-1	1319.55	1517.11	1464.06	1322.51	1244.06	1599.71	179.711	179.711	179.711	179.711	179.711	179.711	179.711	179.711	179.711	179.711	179.711	179.711	1024.82	1057.78	898.553	1008.74	986.852	1091.22
NMW0024	Aniline, N-methyl-	Amine	C7H9N	100-61-8	2.14108e+06	2.18029e+06	2.38883e+06	2.15835e+06	2.16746e+06	2.14399e+06	284947	284947	284947	284947	284947	284947	284947	284947	284947	284947	7.02118e+06	284947	1.47545e+06	1.42474e+06	1.4793e+06	1.49348e+06	1.54462e+06	1.42845e+06
KMW0736	Apocynin	Ketone	C9H10O3	498-02-2	41390	39232.4	38597.3	38743.3	38133.4	38976.4	24960.8	20045.3	24095.2	18827.5	24614.8	25142.7	18622.2	18611.1	16453.6	17430.5	15686.6	17737.2	39528.3	39935.3	36458.6	39776.6	37852.6	40015.1
XMW0812	Benzene, (1-methyl-1-propylpentyl)-	Aromatics	C15H24	54932-91-1	324226	270734	325778	255440	294975	285652	42508.6	42508.6	42508.6	42508.6	42508.6	42508.6	42508.6	42508.6	42508.6	42508.6	42508.6	42508.6	227669	215930	212543	230432	237417	238543
D98	Benzene, (methylthio)-	Sulfur compounds	C7H8S	100-68-5	485360	483377	476831	468115	479282	489413	297823	323636	341462	288480	291366	191728	38345.6	38345.6	38345.6	38345.6	38345.6	38345.6	444878	466256	451832	465676	455007	462138
XMW0037	Benzene, 1-ethyl-3,5-dimethyl-	Aromatics	C10H14	934-74-7	3.38108e+06	3.41459e+06	3.84043e+06	3.68551e+06	3.64499e+06	3.35481e+06	485396	485396	485396	485396	485396	485396	485396	485396	485396	485396	485396	485396	2.5091e+06	2.46031e+06	2.52979e+06	2.54184e+06	2.60802e+06	2.42698e+06
XMW0712	Benzene, 1-propynyl-	Aromatics	C9H8	673-32-5	385992	391415	436066	415964	412850	384855	52552.5	52552.5	52552.5	52552.5	52552.5	52552.5	52552.5	52552.5	52552.5	52552.5	52552.5	52552.5	272248	263592	272879	276580	283507	262763
XMW1229	Bicyclo(3.3.1)non-2-ene	Hydrocarbons	C9H14	6671-66-5	3.90486e+06	4.10857e+06	4.41026e+06	4.21351e+06	4.20525e+06	4.14815e+06	429183	429183	429183	429183	429183	429183	429183	429183	429183	429183	429183	429183	2.55813e+06	2.14592e+06	2.6224e+06	2.62875e+06	2.80165e+06	2.34796e+06
D414	Bicyclo[3.1.0]hex-3-en-2-one, 5-(1-methylethyl)-	Ketone	C9H12O	36262-12-1	169949	188150	200908	158420	193112	167798	18658	18658	18658	18658	18658	18658	18658	18658	18658	18658	18658	18658	122427	111228	111574	117772	93289.9	122159
XMW0622	Butanedioic acid, bis(2-methylpropyl) ester	Ester	C12H22O4	925-06-4	39370.5	36603.5	40808	37050.8	38946.1	37646	3577.13	3577.13	3577.13	3577.13	3577.13	3577.13	3577.13	3577.13	3577.13	3577.13	3577.13	3577.13	17885.6	17925.8	17917.5	18155	17886.1	18498
D147*110	Butanoic acid, 3-methyl-, phenylmethyl ester	Ester	C12H16O2	103-38-8	760693	688619	781185	688596	721649	703237	2.16015e+06	2.14524e+06	2.06449e+06	2.07287e+06	2.05088e+06	1.60641e+06	2.60224e+06	2.60245e+06	2.53869e+06	2.37798e+06	2.36816e+06	2.18507e+06	1.00851e+07	8.92595e+06	1.03113e+07	1.02566e+07	1.07598e+07	8.74319e+06
KMW0534	Butyl caprylate	Ester	C12H24O2	589-75-3	1888.73	1888.73	1888.73	1888.73	1888.73	1888.73	12269.8	11643.6	11650.6	11758	11640.3	9443.65	13998.1	13753.9	13945	12982.1	13451.8	12714.4	765283	702730	783947	785120	807669	697592
WMW0223	Cedrene	Terpenoids	C15H24	11028-42-5	6.51166e+06	6.22474e+06	6.44026e+06	6.23834e+06	6.3895e+06	6.22429e+06	723271	723271	723271	723271	723271	723271	723271	723271	723271	723271	723271	723271	3.7552e+06	3.61636e+06	3.6704e+06	3.74013e+06	3.79214e+06	3.78482e+06
NMW0315	Chamazulene	Terpenoids	C14H16	529-05-5	21740.9	18957.8	17829.8	18406	17555.7	16640.7	11591.8	12412.9	11067.7	10875.4	11070.3	10630.2	7197.12	7554.02	7149.55	7119.03	6709.34	6860.34	12295.4	11298.8	11568.8	12146.7	11819.2	12383.1
D451	Cyclohexanecarboxamide, N-ethyl-5-methyl-2-(1-methylethyl)-	Amine	C13H25NO	39711-79-0	8317.55	7092.77	6849.01	7029.11	6847.06	6974.22	4331.51	4298.01	4110.82	4005.49	3758.46	3727.99	2673.74	2774.92	2540.02	2691.28	2748.39	2626.51	3377.09	3843.45	3339.83	3429.64	3529.59	3671.04
XMW0642	Cyclohexanol, 3,5-dimethyl-	Alcohol	C8H16O	5441-52-1	10006.5	9367.18	11547.8	10005.8	8812.42	9798.94	4126.7	2921.66	4096.87	3870.62	2540.94	2514.54	2935.97	502.907	502.907	2666.2	502.907	502.907	5370.32	5996.4	6595.43	6076.04	6387.38	6190.55
KMW0296	Cyclohexene, 1-methyl-4-(1-methylethylidene)-	Terpenoids	C10H16	586-62-9	5.10608e+07	5.08046e+07	6.00664e+07	5.63869e+07	5.64089e+07	5.04192e+07	3.03584e+06	3.03584e+06	3.03584e+06	3.03584e+06	3.03584e+06	3.03584e+06	3.03584e+06	3.03584e+06	3.03584e+06	3.03584e+06	3.03584e+06	3.03584e+06	2.36946e+07	2.33987e+07	2.35004e+07	2.36998e+07	2.40602e+07	1.51792e+07
NMW0093*140	D-Verbenone	Terpenoids	C10H14O	18309-32-5	952212	941820	883416	897011	909059	885935	112760	112760	112760	112760	112760	112760	112760	112760	112760	112760	112760	112760	797135	811609	781388	822555	792764	818920
KMW0542	Decanoic acid, ethyl ester	Ester	C12H24O2	110-38-3	2007.47	1563.13	1886.01	1570.18	1538.97	1557.29	6192.43	6188.16	6228.75	6212.07	5850.47	4302.59	7922.06	7407.71	7538.81	7052.31	6992.32	6761.47	36393.8	35474.4	37040.9	36894.5	37540.5	35847
D78	Dihydro-3-(2H)-thiophenone	Heterocyclic compound	C4H6OS	1003-04-9	44154.3	46718.3	49616	47311.4	45999.6	47713.7	5093.08	5093.08	5093.08	5093.08	5093.08	5093.08	5093.08	5093.08	5093.08	5093.08	5093.08	5093.08	27413.5	28720.3	31301.7	30701.1	33102.2	25465.4
XMW0536	Dimethylcarbamothioic acid, O-butyl ester	Ester	C7H15NOS	19708-86-2	212.8	296.946	180.72	327.609	350.406	164.574	99.449	166.557	100.863	187.103	160.684	227.174	262.577	243.977	196.09	177.592	186.162	207.468	74609.2	72255.8	80263.7	78599.8	71987.7	63845.3
XMW0204	Dodecane, 5,8-diethyl-	Hydrocarbons	C16H34	24251-86-3	7093.38	5837.26	5850.05	6580.36	6368.63	6699.35	762.181	762.181	762.181	762.181	762.181	762.181	762.181	762.181	762.181	762.181	762.181	762.181	3865.49	4945.37	3901.5	4396.17	3810.91	5106.27
XMW0151	Epizonarene	Terpenoids	C15H24	41702-63-0	9.49224e+06	6.82088e+06	8.7786e+06	6.72569e+06	7.53007e+06	9.55274e+06	922699	922699	922699	922699	922699	922699	922699	922699	922699	922699	922699	922699	7.42466e+06	6.03692e+06	6.02652e+06	4.61349e+06	7.56867e+06	7.67166e+06
XMW1220	Ethyl hydrogen succinate	Ester	C6H10O4	1070-34-4	11252.4	11252.4	11252.4	11252.4	11252.4	11252.4	11252.4	11252.4	11252.4	11252.4	11252.4	11252.4	11252.4	11252.4	11252.4	11252.4	11252.4	11252.4	166502	175034	158990	155696	139609	183151
XMW0163	Furan, 2-hexyl-	Heterocyclic compound	C10H16O	3777-70-6	9113.71	10184.4	10392.8	9884.3	9324.86	9494.73	977.729	977.729	977.729	977.729	977.729	977.729	977.729	977.729	977.729	977.729	977.729	977.729	5026.92	4888.64	977.729	977.729	6472.34	5164.98
D416	Furfuryl pentanoate	Ester	C10H14O3	36701-01-6	208224	204562	193019	196328	194582	193810	115440	117390	108297	106460	100182	103688	105285	100056	96539.5	103132	80981.1	95004.3	171648	174456	169064	178414	170332	179169
NMW0263	GrAmine	Heterocyclic compound	C11H14N2	87-52-5	87943.4	72877.6	76120.1	71122.1	70754	69155.2	45378.3	55021.8	45171.1	52844.3	42382.9	35556	28658.2	29275.3	27548.3	26704.4	27354.4	26445	41948	42811	40692	42538.7	42924.6	46494.4
KMW0683	Heptadecane	Hydrocarbons	C17H36	629-78-7	76677.4	67889.7	63816.5	70066.6	76267.9	88277.4	30752.7	43783.4	34611	33559.4	29116.8	34865.3	26335.9	29992	33237.3	28927.3	33191	35961	28785.4	44264.2	31635.2	39564.9	30081	41501.5
XMW0221	Heptadecane, 7-methyl-	Hydrocarbons	C18H38	20959-33-5	27420.4	22246	22459.3	23972.5	29192	31177.2	11387.6	15714.1	12787.7	12221.6	10701.7	12390.1	10121.3	11740	14086.1	12778.3	14258.7	13841.6	11625.1	17311.4	13485.4	16995.7	12218.7	16851.9
NMW0221	Hexa-2,4-diyn-1-ylbenzene	Aromatics	C12H10	520-74-1	36978.6	28217.5	28604	26617.3	28931.2	28693.5	26209.8	28382.2	25247.7	25023.1	23868.2	23066.4	14757.3	14927.2	13120.6	13527.9	11871.9	13543	28330.8	31558.5	28432.2	30986.8	30122	33553.3
XMW1240	Hexanoic acid, 2-methylbutyl ester	Ester	C11H22O2	2601-13-0	78849.2	77864.9	73005.7	74204.2	74782.6	76653.5	43545.3	45078.2	42071.1	40620.6	39992.9	40196.2	41250.5	38184.7	38314.5	39374.7	30478.5	35890	65233.9	68619.2	67552	68784	63299	68271.3
XMW0575	L-Norleucine, methyl ester	Ester	C7H15NO2	21754-55-2	60117.5	66156.8	71159.7	68025.6	68709.7	67292.7	7874.21	7874.21	7874.21	7874.21	7874.21	7874.21	7874.21	7874.21	7874.21	7874.21	205347	7874.21	41239.6	40243.8	41230.9	41607.4	42600.6	39371.1
NMW0333	Meperidine	Heterocyclic compound	C15H21NO2	57-42-1	35555.3	30612.7	27768.2	31381.8	35111.3	40060.4	14556	21216.1	17881.9	16499	13829	17682.2	11994.1	13508	16054.8	15115.7	15984.3	16525.4	12235.8	18362.8	13370.6	18077.3	12679.3	17041.2
NMW0174	Mexiletine	Amine	C11H17NO	31828-71-4	4892.51	5659.52	948.968	948.968	948.968	4744.84	8623.49	8447.91	8676.55	8487.96	8066.71	6509.07	948.968	9810.49	9864.63	9101.77	9271.96	8946.76	1.61346e+06	1.60135e+06	1.64652e+06	1.60835e+06	1.87099e+06	1.58025e+06
NMW0058	Naphthalene, 1,2,3,4-tetrahydro-	Aromatics	C10H12	119-64-2	27125	25853.8	25996.4	26049.5	26152.8	27025	13670.5	12002.1	12989.9	12673.8	10237.1	10731.8	12761.4	12600.3	8522.59	12439.1	6634.08	8327.98	22763.5	24368.2	23394.6	20361.3	26568.9	24400.9
NMW0261	Naphthalene, 1-nitro-	Aromatics	C10H7NO2	86-57-7	104431	86267.6	88940.9	84146.8	85890	82459.5	53594.4	65459.8	54595.6	54612.9	50782.9	43695.4	34116.3	35216	33183.1	32018.8	32299.6	30813.3	50588.7	51064.4	47735.8	49895.8	51261.8	55748.3
XMW0520	Nitroguanidine	Nitrogen compounds	CH4N4O2	556-88-7	3872.47	3388.63	4159.59	3178.95	3769.41	3567.69	11322.4	14272	11073.9	8917.91	8738.74	8357.67	17675.4	17102	15873.9	12653.9	15374.5	9612.43	366880	365569	373303	412702	421796	358809
NMW0196	Octanedioic acid, dimethyl ester	Ester	C10H18O4	1732-09-8	8066.07	7368.29	93534.2	7377.4	8119.4	8202.3	911.654	911.654	911.654	911.654	911.654	911.654	911.654	911.654	911.654	911.654	911.654	911.654	5441.81	4558.27	5303.1	5912.86	5808.19	5614.25
NMW0234	Patulin	Heterocyclic compound	C7H6O4	149-29-1	62683.4	55573.8	60092.5	56496	57089.4	56948	2141.21	2141.21	2141.21	2141.21	2141.21	2141.21	2141.21	2141.21	2141.21	2141.21	2141.21	2141.21	38690.5	37148.1	10706	37419.7	38737.1	38662.2
XMW0230	Pentadecane, 2,6,10,14-tetramethyl-	Hydrocarbons	C19H40	1921-70-6	34382.6	32053.1	26204.1	31492.1	33070	34532.2	11513.7	14794.4	12254	13065.7	11522	12726.5	10886.1	14758.5	16849.3	10960.1	12501.6	13491.5	11987.7	15580.7	15843.5	16077.3	13270.7	14380.5
XMW0463*110	Pentanoic acid, phenylmethyl ester	Ester	C12H16O2	10361-39-4	760693	688619	781185	688596	721649	703237	2.16015e+06	2.14524e+06	2.06449e+06	2.07287e+06	2.05088e+06	1.60641e+06	2.60224e+06	2.60245e+06	2.53869e+06	2.37798e+06	2.36816e+06	2.18507e+06	1.00851e+07	8.92595e+06	1.03113e+07	1.02566e+07	1.07598e+07	8.74319e+06
D204	Pentyl octanoate	Ester	C13H26O2	638-25-5	735235	651919	667604	487792	633406	491083	60138.5	60138.5	60138.5	60138.5	60138.5	60138.5	60138.5	60138.5	60138.5	60138.5	60138.5	60138.5	300693	381618	378291	308870	405386	312211
KMW0696	Phenol, 2-methoxy-4-propyl-	Aromatics	C10H14O2	2785-87-7	655.647	431.639	604.409	446.595	454.51	86.3278	1424.93	951.297	1339.98	1400.95	1082.28	968.658	1198.48	1417.13	1261.16	1133.37	1051.46	1149.99	303218	290497	311925	310886	319357	289237
XMW0394	Phenol, 4-(1-phenylethyl)-	Phenol	C14H14O	1988-89-2	142774	123712	119297	117323	114615	111268	73827.1	80317.9	71876.4	72382.1	73070.1	67441.2	47993.4	48877.1	46067.5	44970.8	45062.5	45486.2	80395.9	74599.6	74290.8	80555.7	77721	81887.1
NMW0202	Phenol, 4-pentyl-	Phenol	C11H16O	14938-35-3	3.61886e+06	3.31485e+06	3.73626e+06	3.34866e+06	3.47803e+06	3.35593e+06	1.06923e+06	1.26374e+06	1.01264e+06	1.2426e+06	1.03505e+06	833196	1.36927e+06	1.40347e+06	999127	1.28198e+06	1.24398e+06	1.17131e+06	1.83801e+06	1.74757e+06	1.75703e+06	1.82409e+06	1.89009e+06	1.87797e+06
D188	Pyrazinamide	Heterocyclic compound	C5H5N3O	98-96-4	151670	149457	139978	142075	143149	139129	133837	102872	129120	121703	118797	120496	77878.1	74882	72530.7	77580.9	59653.3	69504.2	124195	127904	122168	129729	124135	128259
WMW0172*091	TRANS-ANETHOLE	Aromatics	C10H12O	4180-23-8	1319.55	1517.11	1464.06	1322.51	1244.06	1599.71	179.711	179.711	179.711	179.711	179.711	179.711	179.711	179.711	179.711	179.711	179.711	179.711	1024.82	1057.78	898.553	1008.74	986.852	1091.22
XMW0372	Tridecane, 4,8-dimethyl-	Hydrocarbons	C15H32	55030-62-1	8452.88	7748.37	8577.34	7691.07	9546.23	7951.01	23585.8	23295.2	22203.9	22691	22954.5	17874	25558.7	26115	26148.1	25002.4	23915.6	22487	140111	137626	140031	142570	149384	127305
D339	cis-.alpha.-Bisabolene	Terpenoids	C15H24	29837-07-8	1.67704e+07	1.63e+07	1.73529e+07	1.61801e+07	1.58619e+07	1.53305e+07	2.65899e+06	2.65899e+06	2.65899e+06	2.65899e+06	2.65899e+06	2.65899e+06	2.65899e+06	2.65899e+06	2.65899e+06	2.65899e+06	2.65899e+06	2.65899e+06	1.6722e+07	1.3295e+07	1.33168e+07	1.64716e+07	1.68832e+07	1.69815e+07
KMW0393	cis-4-Decenal	Aldehyde	C10H18O	21662-09-9	103425	104666	102313	99954.3	103305	100101	58220.2	55473.5	5806.32	30333.8	53078.7	49496.9	37974.1	40053.4	29031.6	38498.5	46895.3	38123.7	82182.1	83350.3	80820.6	84395.3	85154.4	85510.8
XMW1105	n-Heptyl hexanoate	Ester	C13H26O2	6976-72-3	813642	736409	766638	742360	747349	746959	259545	231069	261120	237476	224984	207163	137740	135372	136017	128164	125490	127586	477291	474557	471915	485543	497686	496101
WMW0040*154	trans-.beta.-Ocimene	Terpenoids	C10H16	3779-61-1	8.06525e+07	8.23506e+07	8.31714e+07	8.17587e+07	8.1763e+07	8.12613e+07	1.04086e+07	1.04086e+07	1.04086e+07	1.04086e+07	1.04086e+07	1.04086e+07	1.04086e+07	1.04086e+07	1.04086e+07	1.04086e+07	1.04086e+07	1.04086e+07	5.56597e+07	5.2043e+07	5.60455e+07	5.6457e+07	5.82393e+07	5.22472e+07
KMW0674	trans-2-Dodecen-1-ol	Alcohol	C12H24O	69064-37-5	290946	300296	344387	285373	292766	285395	115864	114678	112066	112561	4841.31	74661.1	106799	103557	99310.4	107583	110899	116266	25406.9	24603.3	24206.5	148930	4841.31	25843.2
KMW0604	(1S,2E,6E,10R)-3,7,11,11-Tetramethylbicyclo[8.1.0]undeca-2,6-diene	Terpenoids	C15H24	24703-35-3	5.95673e+06	5.46984e+06	6.01605e+06	4.21478e+06	5.74342e+06	5.70652e+06	6.69862e+06	6.33736e+06	6.33483e+06	6.37211e+06	6.22302e+06	5.70739e+06	6.87464e+06	6.84887e+06	1.03308e+07	1.12889e+07	1.12509e+07	8.17219e+06	1.86014e+06	1.70074e+06	1.74598e+06	1.82984e+06	1.88371e+06	1.87547e+06
XMW0157*063	(2R,3R,6S)-6-Isopropyl-3-methyl-2-(prop-1-en-2-yl)-3-vinylcyclohexanone	Terpenoids	C15H24O	39020-72-9	70841.2	65874	68449.2	65327.8	68649	67571.5	13065.6	13065.6	13065.6	13065.6	13065.6	185493	196022	190363	186019	154367	152372	161565	13065.6	13065.6	13065.6	13065.6	13065.6	13065.6
XMW0216*063	(2S,3S,6S)-6-Isopropyl-3-methyl-2-(prop-1-en-2-yl)-3-vinylcyclohexanone	Terpenoids	C15H24O	21698-44-2	70841.2	65874	68449.2	65327.8	68649	67571.5	13065.6	13065.6	13065.6	13065.6	13065.6	185493	196022	190363	186019	154367	152372	161565	13065.6	13065.6	13065.6	13065.6	13065.6	13065.6
D328	(5R,10R)-10-Methyl-6-methylene-2-(propan-2-ylidene)spiro[4.5]dec-7-ene	Terpenoids	C15H22	28908-27-2	148475	126138	159121	125093	134559	132756	487478	518957	464494	18775.3	18775.3	350954	571052	566634	553420	500192	481989	459731	111560	104547	93876.4	110256	112418	119399
XMW1227	(E)-2-Methylbut-2-en-1-yl methacrylate	Ester	C9H14O2	88142-95-4	194287	199399	161623	206225	205388	192822	175773	142702	170808	131260	132266	163779	274914	239313	271659	271548	201316	295663	121684	116923	123832	125556	130637	117131
XMW1411	1,3,6,10-Dodecatetraene, 3,7,11-trimethyl-, (Z,E)-	Terpenoids	C15H24	26560-14-5	339933	379815	336204	382521	405752	395804	352670	331279	339910	326994	331574	256404	572941	882603	861971	556535	571029	573630	71330.3	64828.3	64964.1	103849	105430	70271.8
XMW1239	1,3-Dioxepane, 2-heptyl-	Heterocyclic compound	C12H24O2	61732-92-1	22434.5	20139	7698.96	8007.41	7541.41	7502.93	1064.53	1064.53	1064.53	1064.53	1064.53	5322.65	21394.8	21039.1	20046.4	20340.1	1064.53	20011.4	8749.11	8981.78	8988.44	9323.73	8822.25	9313.91
XMW0098*043	1,4-BenzenedicarboxAldehyde	Aldehyde	C8H6O2	623-27-8	146875	177125	195201	141070	129841	138000	174808	171879	175079	164493	155869	162255	1.24895e+06	1.26127e+06	1.18235e+06	1.24686e+06	1.14669e+06	1.21078e+06	121660	110031	122702	127293	128908	120391
XMW0097	1,5-Cycloundecadiene, 8,8-dimethyl-9-methylene-	Hydrocarbons	C14H22	62338-54-9	3.98328e+06	3.62967e+06	4.14942e+06	4.8053e+06	3.80323e+06	3.83669e+06	6.21294e+06	5.97668e+06	5.90055e+06	5.98857e+06	5.82235e+06	4.70535e+06	1.04796e+07	1.06188e+07	1.03509e+07	9.15117e+06	9.20917e+06	6.85078e+06	1.69596e+06	1.38633e+06	1.42151e+06	1.64845e+06	1.66656e+06	1.71858e+06
XMW0231*075	1-((1S,3aR,4R,7S,7aS)-4-Hydroxy-7-isopropyl-4-methyloctahydro-1H-inden-1-yl)ethanone	Terpenoids	C15H26O2	1911-78-0	202.496	202.496	1012.48	202.496	202.496	202.496	7036.84	8009.08	6599.32	6841.84	6537.86	6883.11	25663.1	28096.5	25057.8	25923.9	25809.3	23958.2	1369.56	1406.79	1186.45	1285.43	1178.91	1178.65
XMW0167	1-(2,3,4,5-Tetramethylphenyl)ethanone	Ketone	C12H16O	34764-71-1	107154	101709	107234	105928	107651	105246	119320	6471.61	112603	6471.61	6471.61	102653	187943	187053	178426	176455	179690	179567	35684.9	32358.1	33194.9	34935.6	35707.7	36454.6
NMW0211	1-Cyclohexene-1-carboxylic acid, 4-(1-methylethenyl)-	Terpenoids	C10H14O2	7694-45-3	878680	753368	905966	763341	816283	791213	1.20986e+06	736645	740067	724903	717964	732955	1.68564e+06	1.69097e+06	1.74819e+06	1.57711e+06	1.58786e+06	1.54828e+06	243014	233550	236044	230537	237864	244511
KMW0706	1-Hexadecanol	Alcohol	C16H34O	36653-82-4	41227.5	36489.2	43599.5	26579.9	38181.4	40441.3	20449.7	24218.3	20911.6	21396.5	20473.4	22054.6	136059	147142	145336	140465	154172	135682	32495	33885.6	29199.7	34268.1	28165.8	36412.5
XMW1476	1-Propanone, 1-(4-methoxyphenyl)-	Ketone	C10H12O2	121-97-1	2.00755e+06	2.38619e+06	2.06587e+06	2.33743e+06	2.11643e+06	2.20875e+06	5.58415e+06	9.65026e+06	5.40018e+06	8.83164e+06	5.38567e+06	5.4756e+06	1.58549e+07	1.57171e+07	1.54989e+07	1.37144e+07	1.37854e+07	9.98658e+06	2.69111e+06	1.96223e+06	1.96503e+06	1.94263e+06	2.71652e+06	2.74554e+06
XMW1261	2(3H)-Furanone, 5-acetyldihydro-	Heterocyclic compound	C6H8O3	29393-32-6	3790.56	17088.2	17474.8	3125.88	17381	3500.55	625.176	625.176	80542	625.176	625.176	625.176	53840.9	55000.1	56430.7	51528.1	66244	55125	8750.47	8799.34	8873.85	9146.37	9194.73	9802.07
NMW0308	2,6,9,11-Dodecatetraenal, 2,6,10-trimethyl-	Terpenoids	C15H22O	4955-32-2	8485.95	8485.95	8485.95	8485.95	8485.95	8485.95	8485.95	8485.95	8485.95	8485.95	8485.95	8485.95	124403	127283	125373	113654	117229	108009	8485.95	8485.95	8485.95	8485.95	8485.95	8485.95
KMW0435	2-Decenal, (Z)-	Aldehyde	C10H18O	2497-25-8	307590	397719	423811	399288	382321	359299	321490	328642	247704	352896	365416	338394	381837	384327	355768	366728	466367	366432	203998	180686	199175	157996	185515	193807
XMW0923	3,3-Dimethyl-6-methylenecyclohexene	Hydrocarbons	C9H14	20185-16-4	536289	542192	572701	573377	530763	623009	947997	861301	656446	924942	556760	716354	1.26413e+06	1.27513e+06	1.23688e+06	1.21795e+06	1.10208e+06	1.22363e+06	255538	268152	271518	266375	298413	267152
XMW1172	3,6-Dimethyl-4H-furo[3,2-c]pyran-4-one	Heterocyclic compound	C9H8O3	36745-38-7	24922.8	22345.1	25917	22144.7	23565.2	22403.8	69150.8	63403	65724.1	64886.5	62481.7	51460.6	104110	104225	78182	73800.7	73186.9	70495.5	87557.7	82082.5	97237.6	100420	95363.5	83362
XMW1144	4-Acetoxy-3-methoxystyrene	Aromatics	C11H12O3	46316-15-8	9972.15	7811.94	10364.7	31437.9	8828.24	8247.85	26671.4	27779.4	25273.1	27180.5	28430.7	19037.1	58690.5	58511.6	64784.3	53674.3	53063	50434	20523.6	19069.5	19505.6	19741.3	21596.2	23628.7
D74	4-Acetylanisole	Ketone	C9H10O2	100-06-1	6864.26	7240.2	8207.49	7654.28	7240.2	7019.49	5180.88	471.819	4624.98	4812.4	471.819	4759.21	12152.6	12174.8	11795.7	11096.2	11449.6	11529.2	3306.01	2861.07	2359.1	2901.94	2829.21	3230.42
XMW0942	4-Nitro-1,3-phenylenediAmine	Amine	C6H7N3O2	5131-58-8	14589.5	12056.8	14934.6	13502.2	13395.5	13511.1	9069.04	10509	8955.33	8845.72	8678.64	9497.17	45549.7	47860.3	49494.6	45771.5	49842.8	45307.2	10927.5	12478.1	10099.7	11372.4	10261	14164.3
XMW0854	4a(2H)-Naphthalenol, 1,3,4,5,6,8a-hexahydro-4,7-dimethyl-1-(1-methylethyl)-, (1S,4S,4aS,8aR)-	Terpenoids	C15H26O	73365-77-2	1615.22	1615.22	1615.22	1615.22	1615.22	1615.22	1615.22	1615.22	1615.22	10675	1615.22	14506.3	9178.75	10646.5	9659	9342.84	9113.88	9438.67	1615.22	1615.22	1615.22	1615.22	1615.22	1615.22
D430	5-Acetyl-2,4-dimethylthiazole	Heterocyclic compound	C7H9NOS	38205-60-6	6945.59	6421.73	6742.08	4631.41	4266.36	6647.31	15733.2	13854.6	15236.3	15057.4	13622.7	10659.5	23298.9	23323.3	22500.4	21133.4	21879.8	20140.4	8310.06	8183.4	8188.63	8148	8250.76	9090.7
XMW0790	6,7-Dimethyl-1,2,3,5,8,8a-hexahydronaphthalene	Aromatics	C12H18	107914-92-1	29934.7	28969.2	32304.6	28835.8	30685.9	33806.7	4857.46	4857.46	4857.46	4857.46	4857.46	4857.46	208501	207865	204270	203878	191104	200775	25685.4	24287.3	30858.4	26392.6	27113.5	24729.8
XMW0863*075	7-Acetyl-2-hydroxy-2-methyl-5-isopropylbicyclo[4.3.0]nonane	Terpenoids	C15H26O2	96093-81-1	202.496	202.496	1012.48	202.496	202.496	202.496	7036.84	8009.08	6599.32	6841.84	6537.86	6883.11	25663.1	28096.5	25057.8	25923.9	25809.3	23958.2	1369.56	1406.79	1186.45	1285.43	1178.91	1178.65
XMW0865	8-Isopropyl-1-methyltricyclo[4.4.0.02,7]dec-3-ene-3-carbAldehyde	Aldehyde	C15H22O	41610-68-8	12465.9	10186.5	12392.9	10586.7	10871.2	11025.5	307.129	6379.74	307.129	18761.9	15861	52277.7	40434.9	47736.1	47504.2	44166.9	33662.5	45451.3	2385.19	2352.7	1822.18	2597.84	1535.65	2823.13
NMW0025	Acetic acid, phenyl ester	Ester	C8H8O2	122-79-2	7.80177e+06	7.97238e+06	8.1329e+06	8.00227e+06	7.99326e+06	7.89168e+06	1.00011e+06	1.00011e+06	1.00011e+06	1.00011e+06	1.00011e+06	1.00011e+06	2.66644e+07	2.6524e+07	2.62994e+07	2.58542e+07	2.42348e+07	2.52647e+07	5.15433e+06	5.00053e+06	5.37591e+06	5.41669e+06	5.59552e+06	5.01667e+06
NMW0389	Aminopyrine	Heterocyclic compound	C13H17N3O	58-15-1	2927.05	2360.12	4218.75	7071.91	2467.99	2661.95	1583.66	1890.23	1674.27	1662.09	1415.01	1531	7648.17	8215.62	8482.5	8253.41	8601.16	7549.29	1964.93	2206.93	3508.65	2188.94	4150.79	2279.77
XMW0193	Asarone	Aromatics	C12H16O3	2883-98-9	152587	314915	298257	344949	256500	294669	1.07909e+06	1.08578e+06	695689	1.28448e+06	1.47806e+06	6.22116e+06	4.08402e+06	4.99655e+06	4.80328e+06	4.42376e+06	2.89704e+06	4.67654e+06	130842	128748	86754.7	144316	100765	132955
XMW0820	BenzenAmine, 2-ethyl-	Amine	C8H11N	578-54-1	5562.16	5683.74	6103.57	5361.92	5808.4	5732.7	5046.83	4629.56	4933.97	4907.64	4739.29	4400.74	7525.2	7590.91	7263.08	7865.32	7084.98	7284.87	880.147	880.147	880.147	880.147	880.147	880.147
NMW0012	Benzene, 1,2,3-trimethyl-	Aromatics	C9H12	526-73-8	807794	817620	914781	773234	831381	815201	91770.8	91770.8	91770.8	91770.8	91770.8	2.00175e+06	1.21768e+06	1.28891e+06	1.63079e+06	1.91221e+06	1.97595e+06	1.55323e+06	474685	458854	485404	462400	483495	463459
XMW1176	Benzeneacetic Acid, .alpha.-cyclopentyl-	Acid	C13H16O2	3900-93-4	1293.97	1293.97	1293.97	1293.97	1293.97	1293.97	1293.97	1293.97	1293.97	1293.97	1293.97	1293.97	28688.9	28291.8	28412.5	28695	28921.1	26483	1293.97	1293.97	1293.97	1293.97	1293.97	1293.97
D143	Benzenepropanoic acid, methyl ester	Ester	C10H12O2	103-25-3	2708.25	2643.63	2802.84	2521.74	2803.48	3342.21	454.894	454.894	454.894	454.894	454.894	454.894	18686.2	18932.2	18375.5	18387.7	17224.1	17890.5	2532.63	2308.64	3033.33	2575.97	2594.51	2274.47
XMW1443	Benzoic acid, 1,2,3,4,5-pentamethylcyclopenta-2,4-dienyl ester	Ester	C17H20O2	119254-26-1	16048.5	13922.3	16502.3	15298.5	14995.5	15373.7	9852.87	11360.4	10434.6	9755.8	9599.63	10604.3	46322.6	49880.2	52528.8	47140.1	54007	48474	14676.9	13753.6	14011.3	12825.6	12757.2	16789
KMW0585	Citronellyl isobutyrate	Ester	C14H26O2	97-89-2	977665	1.06951e+06	950981	1.08273e+06	983790	1.11924e+06	1.02083e+06	1.08195e+06	976118	1.07327e+06	953096	972113	1.67805e+06	1.70192e+06	1.56317e+06	1.61314e+06	1.64816e+06	1.67299e+06	335848	307127	313255	331719	336376	341756
XMW1163	Ethyl 2-hydroxybenzyl sulfone	Phenol	C9H12O3S	53380-27-1	5953.97	5953.97	5953.97	5953.97	5953.97	5953.97	5953.97	5953.97	5953.97	5953.97	5953.97	5953.97	83535.4	83520.3	82511.9	80371.8	81495.4	79437	5953.97	5953.97	5953.97	5953.97	5953.97	5953.97
XMW1359	Ethyl tridecanoate	Ester	C15H30O2	28267-29-0	1816.75	218.858	218.858	218.858	1878.18	2151.61	2025.23	2721.22	1429.18	3201.28	5081.64	16353.2	10807.7	13064.9	13207.6	11217.6	15350.7	12937.5	1597.99	1287.75	1094.29	1330.72	1293.85	1495.3
KMW0460	Geraniol	Terpenoids	C10H18O	106-24-1	498703	651133	701795	661506	629709	590355	512684	533769	407273	570423	591676	547331	617025	620777	579950	592534	594032	594581	244639	206477	236508	240111	281616	225019
XMW1046	Heptanoic acid, anhydride	Others	C14H26O3	626-27-7	6436.5	6849.64	6330.44	7218.61	5857.52	7054.99	4303.28	5530.97	4717.79	4942.39	11511.7	11823.6	7999.22	9988.08	9896.91	10555.2	10037.6	11348.8	2888.57	3617.37	2992.67	3225.33	3266.26	4112.74
NMW0170	Hydrocoumarin	Heterocyclic compound	C9H8O2	119-84-6	212560	194211	220407	192406	202259	197536	611076	600421	576065	594988	568124	441308	722401	717742	708958	659574	660990	617019	1.00916e+06	966351	1.03038e+06	1.03023e+06	1.06533e+06	977707
XMW0610*043	IsophthalAldehyde	Aldehyde	C8H6O2	626-19-7	146875	177125	195201	141070	129841	138000	174808	171879	175079	164493	155869	162255	1.24895e+06	1.26127e+06	1.18235e+06	1.24686e+06	1.14669e+06	1.21078e+06	121660	110031	122702	127293	128908	120391
XMW0160	Megastigmatrienone	Ketone	C13H18O	38818-55-2	159627	150149	164742	157712	158887	159098	186579	243100	178187	243906	173390	154593	287023	353024	344423	268560	326508	270748	54853.3	49622.8	51492.4	54312.8	54424.4	56889.4
XMW0614	Nonanoic acid, ethyl ester	Ester	C11H22O2	123-29-5	5222.09	5351.83	5593	5284.31	5175.92	5327.52	807.682	807.682	807.682	807.682	807.682	807.682	12218.8	12703.3	12139.5	12052.4	12053.1	12085.8	4154.49	4125.9	4038.41	4092.32	4157.5	4121.51
NMW0311	Phenacetin	Amine	C10H13NO2	62-44-2	1030.46	1030.46	1030.46	1030.46	1030.46	1030.46	32448.7	36580.6	31965.9	32679.6	31497.9	33692.7	124892	127083	124379	122542	133498	121075	6248.79	5708.36	5259.04	5783.32	5152.32	6011.83
D330	Phenol, 2-(phenylmethyl)-	Phenol	C13H12O	28994-41-4	921.898	921.898	921.898	921.898	921.898	921.898	921.898	921.898	921.898	921.898	921.898	6280.68	4956.61	5066.01	5130.02	4813.59	4739.42	4609.49	921.898	921.898	921.898	921.898	921.898	921.898
D246	Propanoic acid, 2-methyl-, 3,7-dimethyl-2,6-octadienyl ester, (Z)-	Ester	C14H24O2	2345-24-6	590125	697295	598534	713002	750188	727225	633252	595087	614839	588060	598137	493673	1.81458e+06	1.82051e+06	1.78063e+06	1.69796e+06	1.69646e+06	1.65321e+06	180512	171566	174002	171961	172997	184271
KMW0241*014	Pyrazine, 2-ethyl-3-methyl-	Heterocyclic compound	C7H10N2	15707-23-0	214111	217936	231730	230083	213737	222283	242082	206712	225192	236994	19281.1	283262	250349	262747	264715	255635	239610	251446	96405.4	101385	102220	98669.4	111145	97526.6
KMW0183*014	Pyrazine, 2-ethyl-5-methyl-	Heterocyclic compound	C7H10N2	13360-64-0	214111	217936	231730	230083	213737	222283	242082	206712	225192	236994	19281.1	283262	250349	262747	264715	255635	239610	251446	96405.4	101385	102220	98669.4	111145	97526.6
XMW1309	Pyrazine, tetramethyl-	Heterocyclic compound	C8H12N2	1124-11-4	130489	130489	130489	130489	130489	130489	823978	981033	829942	719686	655293	652445	1.48611e+06	1.71343e+06	1.512e+06	1.50793e+06	1.59995e+06	1.49193e+06	130489	130489	130489	130489	130489	130489
KMW0598	Tridecanal	Aldehyde	C13H26O	10486-19-8	135361	127437	138590	121544	134845	132434	227026	228941	220428	258887	216642	232326	481769	474719	463762	379035	377824	393956	141288	155873	149257	145325	142206	145688
XMW0176	[1α,4aα,8aα]-1,2,4a,5,6,8a-hexahydro-4-7-dimethyl-1-[1-methylethyl]naphthalene	Terpenoids	C15H24	31983-22-9	1.57005e+06	1.35907e+06	1.34701e+06	1.51744e+06	1.43666e+06	1.48044e+06	1.40454e+06	83535.4	1.38665e+06	83535.4	83535.4	1.41137e+06	2.38042e+06	2.3076e+06	2.24289e+06	2.31471e+06	2.34155e+06	2.38409e+06	417677	645119	662711	681781	685586	430634
XMW0386*065	cis-Calamenene	Terpenoids	C15H22	72937-55-4	24499.8	24499.8	24499.8	24499.8	24499.8	24499.8	160720	149967	158886	148062	138072	143212	339737	319783	318999	299928	279061	273428	24499.8	24499.8	24499.8	24499.8	24499.8	24499.8
KMW0458	p-Menth-8-en-3-ol, acetate	Ester	C12H20O2	89-49-6	50098.7	65513.8	70448.6	65484.1	62461	58444.4	67573.9	68237.3	53797.5	73323	49761.1	70192.7	98744	100928	77042.2	78138.9	70456.5	93027.2	29093.1	25641.7	29292.7	30078.3	34830.1	27655.9
WMW0021*065	trans-Calamenene	Terpenoids	C15H22	73209-42-4	24499.8	24499.8	24499.8	24499.8	24499.8	24499.8	160720	149967	158886	148062	138072	143212	339737	319783	318999	299928	279061	273428	24499.8	24499.8	24499.8	24499.8	24499.8	24499.8
KMW0685	trans-Farnesol	Terpenoids	C15H26O	106-28-5	1302.31	1302.31	1302.31	1302.31	1302.31	1302.31	1302.31	1302.31	1302.31	1302.31	1302.31	1302.31	16106.7	16657.1	15449.7	15667.2	15800.9	14962.3	1302.31	1302.31	1302.31	1302.31	1302.31	1302.31
XMW0006*015	(+)-3-Carene	Terpenoids	C10H16	498-15-7	3.39495e+06	3.46603e+06	3.67073e+06	3.13781e+06	3.38471e+06	2.89304e+06	5.4422e+06	5.03444e+06	5.06719e+06	5.27137e+06	4.11649e+06	4.73969e+06	3.46463e+06	3.60462e+06	3.34074e+06	3.36109e+06	2.96499e+06	3.44656e+06	1.14296e+06	1.19159e+06	1.18403e+06	1.20512e+06	1.37719e+06	1.19964e+06
XMW0192*015	(+)-4-Carene	Terpenoids	C10H16	29050-33-7	3.39495e+06	3.46603e+06	3.67073e+06	3.13781e+06	3.38471e+06	2.89304e+06	5.4422e+06	5.03444e+06	5.06719e+06	5.27137e+06	4.11649e+06	4.73969e+06	3.46463e+06	3.60462e+06	3.34074e+06	3.36109e+06	2.96499e+06	3.44656e+06	1.14296e+06	1.19159e+06	1.18403e+06	1.20512e+06	1.37719e+06	1.19964e+06
KMW0717	(+)-Diethyl L-tartrate	Ester	C8H14O6	87-91-2	6612.14	5865.25	6704.07	6149	6401.64	5694.24	10594.3	17511	9962.51	11455.6	11144.3	9854.52	7271.15	6960.85	6759.22	5442.62	5871.09	5889.68	2741.97	2746.88	2194.29	1974.42	2616.72	3419.29
XMW1149	(1R,3aS,8aS)-1,4,4,6-Tetramethyl-1,2,3,3a,4,5,7,8-octahydrocyclopenta[c]pentalene	Terpenoids	C15H24	871660-96-7	16693.2	17430.9	20159.9	18839.5	18394.4	17540.5	52809.4	49392	43063.4	53544.5	52942.2	59948.3	23137.2	22412.2	26548.2	21045.2	18227.7	19701.3	5365.95	5111.48	5741.14	5378.04	6052.06	5297.17
NMW0361	(1R,4aR,7R,8aR)-7-(2-Hydroxypropan-2-yl)-1,4a-dimethyldecahydronaphthalen-1-ol	Terpenoids	C15H28O2	4666-84-6	7863.98	5678.37	6047.25	3868.72	6083.07	4745.1	9937.41	16092.2	10860.8	9600.54	14096.6	7266.6	5828.81	6000.71	5905.82	5913.98	7500.37	5531.61	3043.53	2572.86	2237.69	2526.45	2590.93	4120.88
NMW0206	(1R,9R,E)-4,11,11-Trimethyl-8-methylenebicyclo[7.2.0]undec-4-ene	Terpenoids	C15H24	68832-35-9	2.68478e+06	2.45624e+06	2.76904e+06	2.46692e+06	2.57191e+06	2.47478e+06	5.97511e+06	6.0121e+06	5.71209e+06	5.89022e+06	5.70895e+06	4.88919e+06	1.98779e+06	1.94942e+06	1.86769e+06	5.11835e+06	5.07904e+06	4.84764e+06	1.37936e+06	1.30618e+06	1.31623e+06	1.37308e+06	1.41975e+06	1.40306e+06
XMW0853	(1S,4aR,7R,8aR)-1,4a-Dimethyl-7-(prop-1-en-2-yl)decahydronaphthalen-1-ol	Terpenoids	C15H26O	5945-72-2	72561.7	51568.6	53252.5	47488.3	55733.6	59381	92656.5	92906.1	100627	87269.8	108753	58852.6	40560.1	44289.2	43211.9	42628.9	45989	40381.8	32028.5	33651.2	27115.5	29020.5	29054.2	42871.5
D320	(3E,7E)-1,5,5,8-Tetramethylcycloundeca-3,7-dienol	Terpenoids	C15H26O	28446-26-6	131079	100806	91588.2	80043.5	90235	94074.6	183094	198368	185712	187533	155116	164589	120825	129335	137409	110268	115284	112687	14759.6	15414.2	12780.5	15053	19672.9	26455.2
D325	(3R,3aR,7S,8aS)-3,6,8,8-Tetramethyl-4,7,8,8a-tetrahydro-1H-3a,7-methanoazulen-2(3H)-one	Terpenoids	C15H22O	288249-25-2	178284	142968	156164	148750	153240	151595	229996	226676	267966	212996	207233	171200	128819	132239	129878	125352	134976	124217	101171	103218	91656.9	96787	93446.4	110504
D244	(3S,3aR,3bR,4S,7R,7aR)-4-Isopropyl-3,7-dimethyloctahydro-1H-cyclopenta[1,3]cyclopropa[1,2]benzen-3-ol	Terpenoids	C15H26O	23445-02-5	9174.91	8544.13	11352.2	7960.39	8745.24	8268.03	8382.83	14880.3	7882.35	14668.7	7160.52	13738.2	7709.49	6977.87	7053.19	7479.27	7716.55	7637.05	1395.57	1395.57	1395.57	1395.57	1395.57	1395.57
D322	(3S,3aR,6R,8aS)-3,7,7-Trimethyl-8-methylenehexahydro-1H-3a,6-methanoazulen-2(3H)-one	Terpenoids	C15H22O	28624-27-3	53218.3	34928.2	35937.9	31865.3	39657	44584.4	68926.3	68676.9	76516.7	65139.5	60365	46218.6	32642.5	34007	33931.2	32501.2	39310.9	32931.2	24031.8	25229.8	20512.8	21414.2	20779	33864.7
XMW1016	(4,4-Dimethyl-2,4,5,6-tetrahydro-1H-inden-2-yl)acetic Acid	Acid	C13H18O2	113522-67-1	69080.6	57082.5	60261.2	57388.2	59135.2	59356.7	94745.2	91342.7	93236.3	84525.7	82026.7	69505.7	56724.2	59462.7	57750.2	53931.7	56822.3	51429.8	34380.7	35665	35051.6	34065.3	35808	39214.5
NMW0252	(5R,6R)-3,6-Dimethyl-5-(prop-1-en-2-yl)-6-vinyl-6,7-dihydrobenzofuran-4(5H)-one	Terpenoids	C15H18O2	20493-56-5	96932.5	69578.6	60304.4	63249.2	62700.8	81893.6	230415	247070	258721	217452	219933	156607	113714	105581	107521	118395	160263	122066	44818.8	64506	55181.8	55737.1	39386.9	78876.9
WMW0052	(E)-1-Methyl-4-(6-methylhept-5-en-2-ylidene)cyclohex-1-ene	Terpenoids	C15H24	53585-13-0	8.18344e+07	7.56655e+07	8.44445e+07	7.65592e+07	7.97019e+07	7.75847e+07	1.30169e+08	1.31903e+08	1.2393e+08	1.28712e+08	1.23687e+08	1.10641e+08	9.98841e+07	9.91179e+07	9.75979e+07	8.28714e+07	8.4728e+07	8.78876e+07	5.56732e+07	5.37564e+07	5.30699e+07	5.47711e+07	5.58553e+07	5.63193e+07
XMW1000	(E)-5-((1R,3R,6S)-2,3-Dimethyltricyclo[2.2.1.02,6]heptan-3-yl)-2-methylpent-2-enal	Terpenoids	C15H22O	19903-70-9	126142	107148	114339	104017	112343	115061	220383	229070	236452	195601	195036	188344	136144	151328	148170	138376	138987	140214	48389.4	48206.9	46506	46920.7	41631.2	61864.4
NMW0350	(S,E)-4-Hydroxy-3,5,5-trimethyl-4-(3-oxobut-1-en-1-yl)cyclohex-2-enone	Terpenoids	C13H18O3	39763-33-2	11323.4	8604.42	6181.72	4658.18	6582.86	6948.46	9696.36	15852.1	11058.9	17264.1	21255.8	12026.9	4616.78	4710.6	4741.68	4617.5	30308.6	4463.68	4128.33	2809.43	2383.66	2284.09	2028.63	5931.78
D288	(Z)-Pentadec-6-en-2-one	Ketone	C15H28O	252931-22-9	10050.5	6938.75	7319.12	6390.64	7754.33	8190.69	16139.8	15714.7	18595.6	15401.6	14489	10907.4	7524.07	7971.62	7971.24	7808.47	8625.13	8178.42	4710.13	5432.55	4086.51	4344.23	4163.12	6775.69
NMW0306*099	(Z)-epi-.beta.-Santalol	Terpenoids	C15H24O	79081-90-6	23972.3	21553.6	24384.9	22694.4	22989.8	22903.6	28764.4	31102.6	29886.4	28537.8	28951.5	35516.6	27476.4	26292.7	26500	25108.2	28630.9	24218.5	12420.4	11169.7	9554.12	10397.5	10093.9	12803.2
KMW0198*015	.alpha.-Phellandrene 1	Terpenoids	C10H16	99-83-2	3.39495e+06	3.46603e+06	3.67073e+06	3.13781e+06	3.38471e+06	2.89304e+06	5.4422e+06	5.03444e+06	5.06719e+06	5.27137e+06	4.11649e+06	4.73969e+06	3.46463e+06	3.60462e+06	3.34074e+06	3.36109e+06	2.96499e+06	3.44656e+06	1.14296e+06	1.19159e+06	1.18403e+06	1.20512e+06	1.37719e+06	1.19964e+06
KMW0667	.tau.-Muurolol	Terpenoids	C15H26O	19912-62-0	196167	108318	114819	95999.1	161384	163419	271144	281372	271574	263938	254416	232814	181669	188394	173638	177236	180028	170494	118034	112713	104941	110614	111761	126893
XMW0036	1,3-Cyclopentanedione, 4-(3-methylbutyl)-	Ketone	C10H16O2	939-86-6	8857.83	9750.74	9522.64	9570.6	8867.74	8948.1	19443	24870	19548.8	20981.2	20130.3	16843	8860.5	8515.16	8757.47	9719.65	9098.22	8862.63	4810.89	4260.93	3124.53	2912.95	4058.01	5528.54
XMW0209	1,4-Cyclohexadiene-1-methanol, 4-(1-methylethyl)-	Alcohol	C10H16O	22539-72-6	265584	249707	281725	250617	268592	234891	463688	742267	433314	490093	477176	415947	250687	253580	241644	231748	244480	246290	109515	109349	86521	78566.6	109653	141553
NMW0287	1,8,11,14-Heptadecatetraene, (Z,Z,Z)-	Hydrocarbons	C17H28	10482-53-8	127691	83186.8	85880.5	77125.7	93119.5	103503	162655	164766	183864	157411	140443	107009	62029	76564.5	77014.4	77556.8	103746	61545.3	58337.8	59969.2	49012	50892.3	48781.8	80107.7
XMW1273	1-(5-Dimethylethyl)pyrazin-2-yl-ethan-1-one	Heterocyclic compound	C10H14N2O	182306-61-2	1891.36	2476.08	3352.88	3022.32	3198.37	2700.02	7992.26	8770.97	5479.57	8555.06	8973.89	10250.9	2374	2070.51	2482.51	1927.39	2058.98	1605.43	626.747	538.891	739.558	857.214	827.199	725.318
XMW1260	1-Cyclohexene-1-propanol, .alpha.,2,6,6-tetramethyl-	Alcohol	C13H24O	3293-47-8	661412	603156	100525	612260	637441	613035	754627	727186	726707	717166	711563	702934	742414	727266	718002	683748	680499	20104.9	330554	315498	317840	325995	340263	338823
XMW1074	1-Cyclopentene-1-methanol, 2-methyl-5-(1-methylethyl)-	Alcohol	C10H18O	80113-82-2	56876.7	61820.4	48485.6	53246.8	64330.2	55631.2	89905.8	104053	90802.3	87593.1	104407	78423.7	50312.3	51104.3	51526.6	51949.2	49586.3	48904.7	45866.8	41175.2	41472.8	43569.6	40022.7	44643.9
WMW0122	1-Undecyn-4-ol	Alcohol	C11H20O	22127-86-2	478876	580151	638557	604669	573500	698024	551468	592097	394371	633325	589376	608832	636493	646068	407645	421619	555768	587139	285403	252062	277595	350726	340250	270038
KMW0693*135	10-epi-.gamma.-Eudesmol	Terpenoids	C15H26O	15051-81-7	5258.17	3738.21	5258.46	4943.39	4990.12	5517.19	11192.8	11489.9	10732.5	11389.7	11149.6	12404.1	4012.91	411.225	3786.96	4155.51	4538.99	7023.87	2056.13	2593.87	2148.84	2400.01	2943.44	3081.65
XMW1177	11,11-Dimethyl-4,8-dimethylenebicyclo[7.2.0]undecan-3-ol	Alcohol	C15H24O	79580-01-1	466002	338245	352022	314569	368271	382571	549732	738432	642707	517627	647073	509627	370020	385185	376465	370998	417510	364423	222591	233478	199949	208644	196004	280738
D400*124	11-Tetradecen-1-ol, (E)-	Alcohol	C14H28O	35153-18-5	74391.5	49123.4	50841.9	36521.1	55613.2	60141.9	95971.4	99771.1	108794	92632.1	82559.1	61516.8	42586.2	43851	43872.2	44006.5	48510.9	42580.4	34576	36618.2	28225.7	30477.6	28926.4	48651.8
KMW0636	1H-3a,7-Methanoazulen-5-ol, octahydro-3,8,8-trimethyl-6-methylene-	Terpenoids	C15H24O	28231-03-0	84830.4	61289.9	39788.2	56682.8	68000.1	71905.1	101481	103370	107062	100703	89122.8	60793.3	48395.5	50888.1	41797.1	44571.2	46063.9	45542	7139.11	7139.11	7139.11	7139.11	7139.11	7139.11
KMW0615	2(3H)-Furanone, 5-butyldihydro-4-methyl-, cis-	Heterocyclic compound	C9H16O2	55013-32-6	16783	14872.2	17023.9	15134	16956.5	14908.7	20479.3	27081.7	20097.9	21913.6	21585.4	17693.4	11027.6	10725.1	10638	10608.2	11463.9	11680.3	5168.91	6640.33	5553.43	5138.31	6284.25	7074.67
WMW0050	2(4H)-Benzofuranone, 5,6,7,7a-tetrahydro-4,4,7a-trimethyl-, (R)-	Heterocyclic compound	C11H16O2	17092-92-1	543700	501896	545769	509015	526790	517240	714321	592072	677927	569512	527119	527180	479331	454024	453963	360955	342620	390729	246295	257839	262912	241294	239400	242397
XMW0390	2,2,4-Trimethyl-1,3-pentanediol diisobutyrate	Ester	C16H30O4	6846-50-0	207113	157985	192393	171669	173301	187485	366773	381406	399310	342188	336331	265886	195776	205715	204032	202233	234867	202063	105042	117340	97560.8	96560.5	91034	134242
GMW0309	2,3,5,9-tetramethyltricyclo[6.3.0.01,5]undec-3-ene	Terpenoids	C15H24	138752-23-5	2.091e+06	2.01622e+06	2.28749e+06	2.37292e+06	2.16744e+06	2.18357e+06	5.21159e+06	6.543e+06	4.95818e+06	5.65774e+06	5.4947e+06	4.84072e+06	2.73205e+06	2.7542e+06	2.64111e+06	2.54409e+06	2.74068e+06	2.76113e+06	1.04501e+06	1.04951e+06	789039	724013	1.03092e+06	1.13303e+06
XMW1389	2,3-Dimethylanisole	Ether	C9H12O	2944-49-2	241051	260268	277903	210443	271293	226281	406549	447674	411675	386948	448815	423157	276054	351708	279784	283839	289697	264358	210623	183631	186291	198564	169559	204330
XMW0084*030	2,4,6-Octatriene, 2,6-dimethyl-	Terpenoids	C10H16	673-84-7	323070	351423	369926	292709	365122	357075	681370	680603	682186	643765	638936	587387	341134	347151	335586	338965	331414	318860	268773	234688	234587	249658	223298	267966
XMW0453*030	2,4,6-Octatriene, 2,6-dimethyl-, (E,Z)-	Terpenoids	C10H16	7216-56-0	323070	351423	369926	292709	365122	357075	681370	680603	682186	643765	638936	587387	341134	347151	335586	338965	331414	318860	268773	234688	234587	249658	223298	267966
XMW1131	2,5-Furandione, 3-methyl-4-propyl-	Heterocyclic compound	C8H10O3	16493-20-2	119951	113518	128312	114494	122876	105866	290508	392180	282030	314771	302449	254610	161228	160973	154536	148893	162291	163674	52126.4	53356.7	39843.8	35323	50830.2	66167.9
XMW0497	2,5-ThiophenedicarboxAldehyde	Heterocyclic compound	C6H4O2S	932-95-6	341588	321674	338098	235262	349775	282974	677013	818654	701031	636695	777524	654843	353645	357157	379783	371019	386828	346971	243639	221773	200382	215437	181165	260821
XMW0203	2,5-di-tert-Butyl-1,4-benzoquinone	Aromatics	C14H20O2	2460-77-7	18134.8	13903.2	13860.8	12677.2	14164.1	15417.3	51977.4	49161.8	56512.1	47820.6	44798	31237.5	21403.4	20782.1	20997.4	21547.1	25355.3	22736.4	10491	11789.4	9964.65	9786.92	9191.72	13350.4
NMW0302	2,6,10-Dodecatrien-1-ol, 3,7,11-trimethyl-, (Z,E)-	Terpenoids	C15H26O	3790-71-4	23091.8	20385.3	23867.8	21942.7	22744.3	22191.1	25799.1	28846.9	25880.7	25781.7	25449.7	26577	19292.9	20648.3	20730.2	19024.7	20820.3	18613.6	10441.6	10657.8	9092.71	9994.26	9073.19	12344.2
KMW0681	2,6,11-Dodecatrienal, 2,6-dimethyl-10-methylene-	Terpenoids	C15H22O	60066-88-8	89008.9	80886.4	91568.6	84392	87769.7	85372.8	104596	116092	103961	104868	107387	112948	72295.5	71963	73479	68228.8	75499.9	66647.6	39331.4	40614.2	35639.1	37770.7	35558.3	45823.5
XMW0744	2,6-Dodecadien-1-al	Aldehyde	C12H20O	21662-13-5	43600.9	39049.4	43057	42047.7	40778.5	40740.3	91078.2	87677.4	53710.9	72460.8	85000.5	55825	49079.8	49404.3	49215.8	46068.8	47205.8	49955.2	24065.8	23326.4	23559.7	23844.6	23650.8	24827.4
NMW0141	2,7-Octadiene-1,6-diol, 2,6-dimethyl-, (E)-	Terpenoids	C10H18O2	75991-61-6	91537	73541.5	83583.2	79977.3	84975.1	76689.4	125131	158223	124887	133161	130093	106501	75889.9	73737.2	74259.7	70721.9	77050.3	75597.2	31050.3	53050.8	31193.8	27112	49531.3	62096.9
XMW1084	2-Butenoic acid, 3-hexenyl ester, (E,Z)-	Ester	C10H16O2	65405-80-3	73349.8	83401.3	82030	77581.6	81795.8	79349.4	144254	116493	152671	143144	134793	127575	9126.08	9126.08	105276	9126.08	102274	99268.7	45906.9	45630.4	48750.3	51055.7	51033.1	48083.7
KMW0310	2-Cyclohexen-1-ol, 1-methyl-4-(1-methylethenyl)-, trans-	Alcohol	C10H16O	7212-40-0	43553.9	36097.7	37699.3	34153	37093.2	36328.2	69234.6	77737.5	67247.2	66463.4	62524.7	57837.3	32507.9	32202	33845.4	33653.6	37306.4	31356.8	22570.5	23677.6	23146	24992.7	22013	30504.4
XMW0527	2-Cyclohexen-1-ol, 1-methyl-4-(1-methylethyl)-, cis-	Alcohol	C10H18O	29803-82-5	514562	554576	594190	454742	567549	473008	809155	896105	767719	768463	891077	942479	452644	450184	465680	462565	515224	430752	344980	309827	308902	327657	300254	350780
KMW0547	2-Cyclohexen-1-ol, 2-methyl-5-(1-methylethenyl)-, acetate	Ester	C12H18O2	97-42-7	48583.1	46946.4	54607.4	31941.4	51966.2	30001	92541.9	111251	82726.9	100594	100358	96986.9	54044.7	54986.4	53837	51453.4	45498.7	44678	20061.6	20909.4	17019.5	17001	21446.5	24647.1
XMW0951	2-Cyclohexen-1-ol, 2-methyl-5-(1-methylethenyl)-, acetate, (1R-cis)-	Ester	C12H18O2	7111-29-7	18041.7	19085.9	23843.4	21384.9	21488.4	20186.6	37635.7	43554.5	39198.3	37446.1	36553	31618.8	9198.53	9008.74	45413.6	47563.1	9317.35	44654.1	11782.3	11996	11471.6	11550.7	12693.8	13553
XMW0956	2-Cyclohexen-1-ol, 2-methyl-5-(1-methylethenyl)-, acetate, cis-	Ester	C12H18O2	1205-42-1	62957.6	56075.6	59932	55817.5	55030.7	51819.1	73422	97509.1	68011.9	68937.8	60300.3	67691	68765.4	67953.7	66142.9	62143.9	60034	57173.1	22662.1	20528	21926.6	22232.1	24142.9	21677.1
KMW0420	2-Cyclohexen-1-ol, 3-methyl-6-(1-methylethyl)-, trans-	Terpenoids	C10H18O	16721-39-4	580203	544265	556773	395615	591297	469772	988657	1.27889e+06	1.33806e+06	939265	1.13903e+06	977199	514347	546645	575445	556711	610162	513284	402283	377832	352719	367329	307621	425564
KMW0701*135	2-Naphthalenemethanol, 1,2,3,4,4a,5,6,7-octahydro-.alpha.,.alpha.,4a,8-tetramethyl-, (2R-cis)-	Terpenoids	C15H26O	1209-71-8	5258.17	3738.21	5258.46	4943.39	4990.12	5517.19	11192.8	11489.9	10732.5	11389.7	11149.6	12404.1	4012.91	411.225	3786.96	4155.51	4538.99	7023.87	2056.13	2593.87	2148.84	2400.01	2943.44	3081.65
XMW0175	2-Nonen-4-one	Ketone	C9H16O	32064-72-5	309426	336206	360653	279083	349050	268614	513794	641615	581498	489525	605371	566921	319195	325829	320387	320163	319482	303714	224428	179671	177481	189298	167805	223488
XMW1463	2-Oxabicyclo[2.2.2]octan-6-ol, 1,3,3-trimethyl-, acetate	Ester	C12H20O3	57709-95-2	38841.7	36367.2	40909.7	35095.1	39088.8	32632.6	81950.7	98969.4	76179.1	88235.5	88037.5	64275	36149.3	37178.8	36217.5	34009.3	35772.3	34705	14825.3	14552.5	11694.5	11372.6	14899.8	18821.2
D123	2-Propanone, 1,3-diphenyl-	Aromatics	C15H14O	102-04-5	17226.5	14222.6	14112.3	6879.87	11612.9	15807.4	19440.4	35273.9	25332.7	24831.6	29659	19236.7	18848.1	18299.4	20419.4	17160	18920.3	14958.8	5327.33	9473.67	6994.64	7055.4	6215.39	11920.5
NMW0195*057	2-Propen-1-ol, 3-phenyl-, acetate, (E)-	Ester	C11H12O2	21040-45-9	40381.8	31001.3	42876.2	30859.1	37333.5	31617.9	74993.6	79904.7	72074.4	77001.6	73414.3	75867.4	79378.1	3474.25	80685	3474.25	3474.25	3474.25	18598	17894.9	17371.2	19182.1	19912.5	19186.2
XMW0062	2-Propenoic acid, 2-methyl-, 3,3,5-trimethylcyclohexyl ester	Ester	C13H22O2	7779-31-9	39901.2	36586.1	41006.1	35860.7	39507.9	32049	76294.3	94756.9	73773.8	82057.7	79084	67405.5	36576.9	36342.5	35900.2	33827.9	36586.4	35776.7	27496.2	27714.2	22615.4	19520.8	26443.6	25850.4
KMW0708	2-[(2S,4aR,8aR)-4a,8-dimethyl-2,3,4,5,6,8a-hexahydro-1H-naphthalen-2-yl]propan-2-ol	Terpenoids	C15H26O	123123-38-6	98623.6	75233.4	76109.3	67788.2	74520.6	81631.3	231074	136931	254874	122857	109797	80891.1	57761.4	64741.6	65431.3	61673.4	69287.3	59064.1	37776.3	41071.7	35101.6	36166.4	35870.4	50920.8
D195	2H-1-Benzopyran-2-one, 4-hydroxy-	Heterocyclic compound	C9H6O3	1076-38-6	27396.7	19016.3	18805.2	18047.4	20390.4	22250.6	49637.9	50800.6	56071.7	47824.4	42810.6	32186.6	23061.1	24472.2	24953.4	23784.9	26581	22460.9	12011	12130.8	9726.87	10128.9	9803.8	17508.7
D337	2H-2a,7-Methanoazuleno[5,6-b]oxirene, octahydro-3,6,6,7a-tetramethyl-	Terpenoids	C15H24O	29597-36-2	170365	122122	125237	115254	129067	141188	367516	375535	357534	328818	272623	226047	159560	157196	159908	160800	205398	180386	84434.5	90630.1	79421.9	80183.7	75176.1	105832
XMW0117	3,4-Dimethylcyclohexanol	Alcohol	C8H16O	5715-23-1	307509	216956	230191	178845	224564	272875	468733	477891	561059	431299	474999	324639	233663	235778	253706	240985	260581	237776	142610	185613	122956	131113	115895	211469
XMW0275	3,5,9-Undecatrien-2-one, 6,10-dimethyl-	Ketone	C13H20O	141-10-6	23842.2	17122.7	17608	15511.2	16246.5	19956.5	34763.2	35494.5	37123.2	31343	31391.3	24584.8	11979.9	11634.1	12898.6	11758.1	13109.4	17815.8	14532.1	15559.1	13627	13615.8	12312.8	18820.2
KMW0531	3,6-Nonadien-1-ol, (E,Z)-	Alcohol	C9H16O	56805-23-3	99144.6	66337.9	64926.8	53576.9	69290.2	62912	98471.9	132390	114607	88153.7	104537	77363	77793.6	75271.2	79104.5	80975.1	88151.5	75275.3	47216.2	50353.5	41723.5	43348.2	40140.1	61503.5
XMW1460	3-Buten-2-one, 4-phenyl-	Ketone	C10H10O	122-57-6	5819	5263.73	8370.31	5573.43	4984.37	7399.8	19959.5	16493.4	18803.4	17756.5	17072.3	16173.7	10393.2	9625.92	9880.75	8950.03	8996.62	8232.51	7051.32	3902.33	4391.23	4312.9	4758.76	6720.47
NMW0281	3-Butylisobenzofuran-1(3H)-one	Heterocyclic compound	C12H14O2	6066-49-5	88725.2	78786.3	87012.4	83005.5	79013.3	75532.7	143394	151773	142156	141019	99917.7	83246.6	75139.4	75220.1	72731.5	93109.2	97914	86896.3	56063.3	51569.8	51290.7	54752.5	53587.2	64579.4
KMW0220*015	3-Carene	Terpenoids	C10H16	13466-78-9	3.39495e+06	3.46603e+06	3.67073e+06	3.13781e+06	3.38471e+06	2.89304e+06	5.4422e+06	5.03444e+06	5.06719e+06	5.27137e+06	4.11649e+06	4.73969e+06	3.46463e+06	3.60462e+06	3.34074e+06	3.36109e+06	2.96499e+06	3.44656e+06	1.14296e+06	1.19159e+06	1.18403e+06	1.20512e+06	1.37719e+06	1.19964e+06
XMW0774	3-Hexene, 1-(1-methoxyethoxy)-, (Z)-	Hydrocarbons	C9H18O2	54340-96-4	57886.2	58055.4	41926.4	59731	37651	54447.1	69256	57557.2	63750.5	67000.3	51393	58781.9	43933.1	43742.1	41299	42187.5	37699.7	42362.4	23573.4	24101.6	24444.3	24089.6	27449.4	23981.1
KMW0608	3-Mercaptohexanol	Alcohol	C6H14OS	51755-83-0	157224	171596	183395	141953	177867	133770	294120	321252	290171	284437	306219	287465	161822	164852	162849	162014	160933	153657	102675	88374.1	88747.2	94348.6	83599.3	101984
D366	3-Octen-2-one, 7-methyl-	Ketone	C9H16O	33046-81-0	56397.5	59463	64203.7	50867.1	64176.5	57103.9	119681	136397	119446	113115	119743	109534	67317.6	66734.1	68686.2	68662.8	58658.7	64077	41055.3	38203.9	36908.9	39584.9	36173.9	40362.5
XMW0440	4-(Aminomethyl)pyridine	Heterocyclic compound	C6H8N2	3731-53-1	56470.1	63502.3	68007.5	52663.4	65535.3	55915.1	95163.5	121420	95724.4	90661.8	113383	105496	58621.8	59693	59702.2	59428.7	59811	55919.3	41535.8	36866.5	36839	38863.3	36101.9	39432.8
KMW0337	4-Isopropyl-1-methylcyclohex-2-enol	Terpenoids	C10H18O	619-62-5	421668	458284	484790	434146	545395	458065	867195	862067	867613	817833	798346	751304	432876	443250	424360	432647	423660	405391	343987	301395	300053	322327	284424	343527
XMW1481	5'-Hydroxy-2',3',4'-trimethylacetophenone	Ketone	C11H14O2	13667-28-2	27849.4	21788.9	21466.3	19595.2	22514.4	23365.3	60684	62622.4	68529.3	55918.5	56648.7	45229.9	33288.6	33030.7	32781.5	33371.8	38157.4	32669.5	15219.7	16630.5	13667.5	14525.4	13566.8	19499.8
KMW0308	5-Methyl-2-thiophenecarboxaldehyde	Heterocyclic compound	C6H6OS	13679-70-4	42013.8	44817	48337.1	37438.6	46792.6	39663.9	76744.4	77052.4	78271.9	73652.3	71167.5	66670.6	44315.9	44224.2	38653.5	38958.8	36933.2	36695.1	28328.5	25780.5	25354.5	27196.6	24479.2	29665.6
XMW0133	6-Methyl-6-(5-methylfuran-2-yl)heptan-2-one	Heterocyclic compound	C13H20O2	50464-95-4	111513	100889	108169	105807	103844	103123	241635	232666	234608	194559	226858	143364	127900	127111	128384	120559	121214	129946	60978.6	59497.4	59869.8	59935.7	61165.5	63782.1
WMW0048	6-Nonenal, (E)-	Aldehyde	C9H16O	2277-20-5	82058	93631.4	99709.1	68269.9	95746.4	68509	157345	167925	153087	148978	158928	153442	84581.4	85795.1	84387.8	84233.9	85592.3	79911.1	53103.4	45568.4	45501.9	48406.5	44524.6	58986.9
KMW0515	6-Octen-1-ol, 3,7-dimethyl-, acetate	Ester	C12H22O2	150-84-5	19962.6	18727.1	21367	19149.7	20035	16961	47540.7	61902.2	45077.2	50313.2	49042.4	41926.8	25645.5	25937.4	24781.7	23817.5	25784.8	25728.2	7303.32	7334.45	5588.68	5033.34	7194.8	9848.26
XMW1322	7(1H)-Pteridinone	Heterocyclic compound	C6H4N4O	2432-27-1	42035.4	36844.8	35047.5	27422.8	42822.5	44813.4	70745.9	61003.3	69478.4	59648.8	60538.7	42060.5	33336.8	38487.2	38771.6	30388.3	34765.2	31063.3	15616.7	16733.5	15925.2	15516.5	20216.9	14709.5
D432	8-Dodecen-1-ol, acetate, (E)-	Ester	C14H26O2	38363-29-0	201819	142671	160955	123464	178006	182121	490816	467483	544092	443394	454846	277218	207118	205872	208065	253160	253234	233421	135689	143423	87895.8	125596	111832	169236
XMW0749	8-Hexadecyne	Hydrocarbons	C16H30	19781-86-3	32841.7	29175.9	33297.2	32351.6	31803.2	32475.6	44978.1	51304	44832.3	45043.9	46138.5	48254.9	29434.5	30103.6	31417.2	28108.4	31812.7	27705.7	14717	15176.7	14955.7	14168.4	12389.8	16518.8
KMW0078	8-Nonen-2-one	Ketone	C9H16O	5009-32-5	353534	346522	356589	332274	346941	356924	2.07817e+06	1.817e+06	1.95095e+06	2.03913e+06	48446	48446	48446	48446	48446	48446	48446	48446	298270	292027	293116	295801	306893	297688
D396	9-Dodecen-1-ol, acetate, (E)-	Ester	C14H26O2	35148-19-7	14861.9	11474.8	11272.2	10862.7	11980.1	12607.6	17038.2	20640.6	16657.4	18042.2	14025.6	14372.5	10536.3	11546.8	11759.7	9726.13	10342.3	9711.74	2211.96	2399.6	1825.81	2241.84	2373.9	2873.42
NMW0194*057	Acetic Acid, cinnamyl ester	Acid	C11H12O2	103-54-8	40381.8	31001.3	42876.2	30859.1	37333.5	31617.9	74993.6	79904.7	72074.4	77001.6	73414.3	75867.4	79378.1	3474.25	80685	3474.25	3474.25	3474.25	18598	17894.9	17371.2	19182.1	19912.5	19186.2
D141	Acetic acid, 2-ethylhexyl ester	Ester	C10H20O2	103-09-3	44929.6	47729.4	51784.3	40142.5	50288.1	41605.5	81378.4	76871.8	70891.6	76743.4	76300	71761.9	38546.7	39960	37759	38453.7	40540.7	36500.1	31139.9	27222.6	27471.9	29604.7	25773.4	31183.7
NMW0351	Acridine	Heterocyclic compound	C13H9N	260-94-6	22403	15984.1	15202.6	11253.5	16097.1	12631.6	29165.6	54240.5	27208.7	31428.5	60956	30412.2	20265.1	13966.8	22622.4	13726.9	20172.6	12928.1	8353.54	6307.39	5557.94	5312.13	5185.3	15779.6
NMW0364	Adenine	Heterocyclic compound	C5H5N5	73-24-5	20631.9	15160.4	16754.9	13308.3	16722.6	14688.9	31348.2	42042.3	33679.1	31497.8	35212.3	28138.2	4642.06	4804.24	7092.65	4478.45	6713.19	3969.81	11982.5	4118.34	2926.75	3348.42	2591.21	14701.8
XMW0172	Azacyclohexan-3-one, 1,5,6-trimethyl-	Heterocyclic compound	C8H15NO	339590-59-9	19993.8	30906.3	33811.5	20294.3	32760.6	29664.5	68277.3	48879.7	70658.9	66661.3	44903.3	45453.3	28812	38770.6	37354.1	38051.2	37225.2	36207.6	20703.8	18324.8	18095.8	19459.6	17417.1	20350.8
XMW0664	BenzAldehyde, 2,4-dihydroxy-3,6-dimethyl-	Aldehyde	C9H10O3	34883-14-2	8330.51	5612.74	7118.4	6894.09	4942.16	4591.53	25174.9	24892.9	53281.2	24057.5	23225.6	20753.5	13159.8	12230.6	11636.6	12188.3	13031.6	11569.1	6217.94	5052.87	4802.69	4624.97	5760.29	5398.97
NMW0145	Benzamide	Amine	C7H7NO	55-21-0	264626	249296	280795	251153	267025	232520	448727	713691	415588	468856	456188	401566	236944	237545	228796	218289	230609	233669	107001	107007	85185.2	77172.4	110075	139612
XMW0784	Benzene, 1,2-diethyl-3,4-dimethyl-	Aromatics	C12H18	54410-75-2	14979.8	16488.6	19196.1	19047.4	17333.8	16650.5	52937.8	54360.3	33838.8	56379	59373.4	68068.6	14289	13591.5	13570.3	12392.5	11213.3	12035.1	4761.59	5206.21	4832.22	6002.76	6963.09	5516
XMW0041	Benzene, 1,2-dimethoxy-4-(1-propenyl)-	Aromatics	C11H14O2	93-16-3	513952	513952	513952	513952	513952	513952	9.05853e+06	9.76539e+06	8.24106e+06	8.27725e+06	8.69267e+06	9.9451e+06	3.22844e+06	3.61314e+06	3.1195e+06	3.22154e+06	2.99582e+06	3.11388e+06	513952	513952	513952	513952	513952	513952
XMW1157	Benzene, 1,4-dimethoxy-2-methyl-5-isopropyl-	Aromatics	C12H18O2	14753-08-3	2.9045e+06	3.24225e+06	2.89498e+06	3.12505e+06	2.86663e+06	3.08279e+06	6.03139e+06	5.02743e+06	5.65671e+06	4.70089e+06	4.69924e+06	5.82404e+06	4.34343e+06	3.65483e+06	3.63465e+06	4.14002e+06	4.12926e+06	3.41316e+06	573326	573326	573326	573326	573326	573326
XMW1101	Benzene, 1,4-dimethyl-2,5-bis(1-methylethyl)-	Aromatics	C14H22	10375-96-9	19035.9	14660.5	17094.4	13899.6	16657.4	14009.8	36884.6	25070.2	34587.7	33727.6	31212.7	28796.7	20002.3	18600.4	24598.4	17756.1	17708.6	15977.4	9323.2	8661.83	9639.09	9673.53	10851.9	9215.5
NMW0279	Benzenepropanoic Acid, 4-hydroxy-	Acid	C9H10O3	501-97-3	250908	180077	193336	187768	188400	179714	284999	297310	272699	277646	280065	260014	202305	201491	196404	185566	191977	184602	127252	123894	118191	123180	124640	138673
NMW0278	Benzenepropanol, 4-hydroxy-3-methoxy-	Alcohol	C10H14O3	2305-13-7	72380.2	57463.7	59688.4	52473	58925.9	57769.7	91993.5	97677.4	117856	88424	82190.2	68304.2	54491.5	59852.7	54650.5	56921.6	59450.2	53200.9	33745.6	40201	30042	31681.8	31688.1	46467.5
NMW0362	BenzphetAmine	Amine	C17H21N	156-08-1	9706.92	6979.65	7814.67	5902.62	7193.46	5927.63	11118.5	17084.7	12072.7	11130.2	15033.3	8740.11	7391.08	7241.02	7394.68	7555.91	9258.98	6317.63	3797.23	4028.48	3608.71	2882.63	2976.44	5584.24
KMW0357	Bicyclo[2.2.1]heptan-2-ol, 2,3,3-trimethyl-	Terpenoids	C10H18O	465-31-6	212077	230277	246763	182967	241719	200897	357071	396739	365592	341743	399739	379040	220526	227481	224967	230015	224616	210997	183943	160584	162698	173219	146277	180045
D269*106	Butanoic acid, 2-methyl-, 2-methylpropyl ester	Ester	C9H18O2	2445-67-2	146667	79340.9	85661.6	71185.8	83089.4	85315.5	183456	158166	175237	167738	135390	105676	112368	111158	111072	113012	117798	110570	43954.4	49081.3	43451.5	44393.6	43875.5	58565.8
KMW0366	Butanoic acid, 3-hexenyl ester, (Z)-	Ester	C10H18O2	16491-36-4	78074.5	88113.4	92155.1	81673	86257.8	83605.3	106494	75648.5	97176.7	105503	93556.3	77102.3	72130.9	77533.8	71097.7	70941.3	68330.7	65392.7	45264.3	41302.5	46439.1	46651.4	48451.9	43395.2
D441	Butanoic acid, 3-methyl-, 3,7-dimethyl-2,6-octadienyl ester, (Z)-	Ester	C15H26O2	3915-83-1	115244	82264.5	91804.1	66584.9	91852.2	94517.2	201008	204164	225023	187193	180083	129237	90011.1	93048.2	92739.6	91555.8	105628	96039.7	50521.3	52143.3	44557.6	47116	41925.2	63953.6
XMW0449*029	Butanoic acid, anhydride	Others	C8H14O3	106-31-0	358008	389377	415623	321499	402286	349885	589519	757648	605388	562662	716814	668776	375318	383243	375499	378313	366152	357739	262413	210659	209800	248441	199147	259216
XMW0389	Caryophyllenyl alcohol	Terpenoids	C15H26O	913176-41-7	18545.5	13836.7	14215.1	13457.8	13345.8	14844.2	27940.3	26827.4	29939.5	26199.4	21508.3	17931.2	12186.1	12785	12720.3	11282.2	13494.3	11795.9	5327.39	5903.86	6420.11	5861.83	4824.19	6464.04
NMW0140	Cathinone	Ketone	C9H11NO	71031-15-7	11552.6	9872.95	11304.4	9782.16	11649.2	9285.82	18453.5	22509.8	18458.4	20018.1	22764.3	19823.2	12250.7	12594.9	12061.9	11481.9	12529.7	12166.1	5363.94	5497.34	4562.76	3823.78	5452.35	6847.89
NMW0285	CinnamAldehyde, .alpha.-pentyl-	Aldehyde	C14H18O	122-40-7	32446.6	20922.9	21928.3	19584.7	24323.2	25889.1	67340.2	48587.9	74632.6	63157.7	39264.4	44161	31190	32733.9	32824.5	31307	35778.9	31841.2	20873.5	21908	17078.6	18689.2	18462.2	22206.4
KMW0342	Citronellal	Terpenoids	C10H18O	106-23-0	58552.5	64866	68919.8	51981.3	66964.2	59996.7	133926	151452	138010	129378	158842	146389	65111.8	67660.9	65485.8	65820.1	69323.1	61318.1	52031.9	46856.7	48847.3	50203.2	43599.1	49059.4
XMW1472	Cyclohexane, 1-ethyl-2-propyl-	Hydrocarbons	C11H22	62238-33-9	18674.2	19751	21089.2	15359.4	20703.4	17161	34145.8	35832.2	34962.4	32640.2	35490.3	31779.4	23690.7	24580.5	24790.1	25429.2	26535.6	22971.2	16096.3	13367.2	13592.4	14687.6	12357.2	15257.7
KMW0321	Cyclohexanecarboxylic acid, methyl ester	Ester	C8H14O2	4630-82-4	110368	111164	79636.7	115733	109156	105633	206557	182754	194051	200754	164827	196092	137917	141396	132890	132765	118336	135708	44062.8	45795.6	45968.5	45768.3	51961.9	45881.3
XMW0165	Cyclohexanol, 3-ethenyl-3-methyl-2-(1-methylethenyl)-6-(1-methylethyl)-, [1R-(1.alpha.,2.alpha.,3.beta.,6.alpha.)]-	Terpenoids	C15H26O	35727-45-8	33876.1	31371.8	35531.5	33351.4	33908.8	26430.7	38531.8	43514.3	36772.1	38025.9	40209.2	41366.8	25981.2	33422.7	32790.6	30479.3	27779.2	30671.9	14781.7	15228.3	13242.5	13925.1	13029.5	16686.4
XMW1247	Cyclohexene, 6-(2-butenylidene)-1,5,5-trimethyl-, (E,Z)-	Hydrocarbons	C13H20	71186-24-8	108469	103147	118611	104026	111456	94928.5	211266	307584	190531	227083	223583	207495	96863.3	97836.3	95533.3	92207.8	94143.4	95248.8	41609.2	40883.4	33041	31229.8	41885.3	52490.3
D285	Cyclopentaneacetic acid, 3-oxo-2-pentyl-, methyl ester	Ester	C13H22O3	24851-98-7	26999.3	17739.5	21722.6	16425.2	24010.6	26534.9	38833.3	46512.9	50506.4	35516.4	33224.6	20912.5	19914.9	15037.4	17947.2	14550.1	23001.1	19583.8	12400.8	12130.5	9654.9	10667.7	10035	17585.7
KMW0399	Decanal	Aldehyde	C10H20O	112-31-2	71571.9	66967.3	69951.7	48527.9	72373.6	58995.6	155007	186077	160752	145487	177699	149378	83301.8	84727.7	90049.9	86746.2	91371.9	81357.3	49407.9	44778	41067.1	44610.1	37154.6	53939.3
KMW0208	Decane	Hydrocarbons	C10H22	124-18-5	339656	284086	291551	254388	291753	297539	395613	347879	463820	361419	298973	314917	325189	323986	240657	241468	262381	267293	113298	169474	112364	113164	108356	204122
XMW0627	Diethyl Phthalate	Ester	C12H14O4	84-66-2	230483	169274	179213	42198.2	185675	192586	439517	456192	495244	414091	409513	309154	221326	223935	226663	222040	262614	219664	113150	121485	103347	107156	97018.5	148166
KMW0545	Dodecanal	Aldehyde	C12H24O	112-54-9	432079	324218	279975	304098	345205	332409	418409	369500	427790	372217	302200	315874	241895	252241	252579	247008	244193	237801	44039.6	44039.6	44039.6	44039.6	44039.6	44039.6
KMW0599	Dodecanoic acid, methyl ester	Ester	C13H26O2	111-82-0	18107.1	13690.3	17120.6	12330.7	19487.8	19189.8	15661	17009.4	15543.5	15445	18509.5	16899.2	16412.7	13882	15894	15055.9	12940.6	14351.1	2466.13	2466.13	2466.13	2466.13	2466.13	2466.13
XMW0450	Ethanone, 1-(2,4-dimethyl-1H-pyrrol-3-yl)-	Heterocyclic compound	C8H11NO	2386-25-6	9232.38	7084.37	6665.02	5625.81	8088.61	6511.92	12205.4	13033.2	13957	11732.4	10788.9	5348.15	9198.96	9048.14	8202.39	8454.29	8634.27	8283.13	3093.24	3242.49	2941.87	2879.14	3307.67	4145.05
D361*051	Ethyl geranate	Ester	C12H20O2	32659-21-5	3510.95	3634.2	4147.21	3868.3	3628.94	3208.84	7109.96	10306.6	6415.04	8060.63	8520.86	8736.87	3062.72	3064.54	3369.64	2830.08	2699.17	2826.06	1483.8	1702.27	1446.09	1316.88	1682.12	1862.86
D360*051	Ethyl nerate	Ester	C12H20O2	32659-20-4	3510.95	3634.2	4147.21	3868.3	3628.94	3208.84	7109.96	10306.6	6415.04	8060.63	8520.86	8736.87	3062.72	3064.54	3369.64	2830.08	2699.17	2826.06	1483.8	1702.27	1446.09	1316.88	1682.12	1862.86
XMW0711	Formamide, N-phenyl-	Amine	C7H7NO	103-70-8	51577.2	29985.8	31098.7	27161.3	35745.2	38057.8	44023.3	41957.4	50473.9	43745.1	37585.3	30446	29002.4	29250.3	29320.7	31354.6	28199.3	28684.3	19364.3	18381.5	16251.5	17004.7	14584.6	25711.1
XMW1321	Furan, 2-(1,2-diethoxyethyl)-	Heterocyclic compound	C10H16O3	14133-54-1	30579.9	42243.5	46192.3	42238.9	40975.1	37441	45606.7	46158.2	35689.4	50698.3	49762.2	41212.8	43799.8	44826.8	39966.4	40352.3	43955.1	40031	21361.4	19494.7	21387.6	22415.1	26235.8	20642.6
NMW0247	Furan, 3-(4,8-dimethyl-3,7-nonadienyl)-, (E)-	Terpenoids	C15H22O	23262-34-2	158867	140220	152497	136358	150919	139612	185173	205450	187861	184863	187587	169168	131805	136728	138832	122947	139901	124789	82068.1	81477.9	71701.3	74768.9	73513.8	95576.9
XMW0199	Hexadecane, 4-methyl-	Hydrocarbons	C17H36	25117-26-4	35713.4	31424.7	32580.7	34653.9	31157.8	32416.7	33155.3	43002.9	34007.8	33744.7	33153.1	45776.8	25839.8	28985.5	26631.7	26202.7	27432.3	26584.8	18302	19700.1	16356	17325.1	16609.5	19173.6
D199*029	Hexanoic acid, 3-oxo-, ethyl ester	Ester	C8H14O3	3249-68-1	358008	389377	415623	321499	402286	349885	589519	757648	605388	562662	716814	668776	375318	383243	375499	378313	366152	357739	262413	210659	209800	248441	199147	259216
KMW0491	Hydrocinnamic Acid	Acid	C9H10O2	501-52-0	7212.99	6724.72	7729.47	6654.86	7388.44	6120.52	13087.4	19411.1	11997.6	14205.8	14068.5	12730.2	5999.42	6379.51	6146.98	5737.29	6265.05	6103.23	2828.34	2951.62	2483.18	2197.38	2933.38	3626.88
XMW0022	Iridomyrmecin	Terpenoids	C10H16O2	485-43-8	1.73842e+06	1.61989e+06	1.79194e+06	1.63653e+06	1.69479e+06	1.64003e+06	3.69554e+06	3.70625e+06	3.50801e+06	3.61824e+06	3.53598e+06	3.02307e+06	1.2864e+06	1.26679e+06	1.22475e+06	3.12618e+06	3.11957e+06	2.97452e+06	235380	895762	894449	922722	237031	335950
XMW1310*106	Isobutyl isovalerate	Ester	C9H18O2	589-59-3	146667	79340.9	85661.6	71185.8	83089.4	85315.5	183456	158166	175237	167738	135390	105676	112368	111158	111072	113012	117798	110570	43954.4	49081.3	43451.5	44393.6	43875.5	58565.8
XMW1442	Ketone, methyl 2,2,3-trimethylcyclopentyl	Ketone	C10H18O	17983-22-1	2942.04	3556.34	3239.63	3706.14	3909.81	3590.27	8910.48	11313.8	8493.36	8844.46	9494.41	9277.5	476.349	476.349	476.349	476.349	6392.36	476.349	2402.09	2382.47	2488.96	2502.08	2439.7	2381.74
WMW0179	L-Fenchone	Terpenoids	C10H16O	7787-20-4	293884	324078	347344	268536	333738	289794	489299	621668	498259	469613	585988	549967	305844	309335	310325	313064	317679	293851	210878	189537	189811	199525	183650	206733
XMW1136	Lilac Alcohol C	Alcohol	C10H18O2	33081-36-6	75183.8	71872	76120.8	51675.4	76659.1	66738.2	145998	182407	151876	136861	172085	144415	77008.2	78606.1	83772	80734.1	83690.7	75792	55054.5	51666.6	47429.3	50343.2	40970.2	57260.7
XMW1038	Longifolenaldehyde	Terpenoids	C15H24O	19890-84-7	470800	351989	365294	323030	387325	404859	1.05239e+06	1.16437e+06	1.16461e+06	973616	993740	757975	576444	586601	597429	586465	694935	594288	269689	288849	239266	251590	223799	349629
KMW0274	Maltol	Heterocyclic compound	C6H6O3	118-71-8	26546.1	28937.7	30532.8	23811.7	30056.3	26699.8	54207.8	63022	53155.3	50414.8	52974.3	49136.3	30365.3	30343.1	30993.6	30890.1	26794	28980.3	20158.2	18349.5	17881.1	18643.3	18565.8	19923.2
XMW0665	Muurola-4,10(14)-dien-1.beta.-ol	Terpenoids	C15H24O	257293-90-6	12097.1	10262.5	12440.9	11130.5	11465.6	10829.6	19840.6	23615.1	20047.3	22051	20244.8	17605.5	8781.73	14676.9	8751.88	8082.73	8331.64	13829.9	8315.76	5686.15	5141.32	5596.68	6983.03	8950.83
D382*124	Myristoleyl Alcohol	Alcohol	C14H28O	34010-15-6	74391.5	49123.4	50841.9	36521.1	55613.2	60141.9	95971.4	99771.1	108794	92632.1	82559.1	61516.8	42586.2	43851	43872.2	44006.5	48510.9	42580.4	34576	36618.2	28225.7	30477.6	28926.4	48651.8
XMW1107	N,N'-Methylenebismethacrylamide	Amine	C9H14N2O2	2359-15-1	121628	107699	111029	113064	104123	107183	203366	212700	251812	193862	181030	160458	125584	128583	126619	125042	127111	125723	66681.7	64679.3	61938.5	65299	63758.5	67338.5
XMW0550	N-Cyanomethyl-2-cyanimino-pyrrolidine	Heterocyclic compound	C7H8N4	134881-46-2	47910	37949.5	39630.9	35919.9	42287.1	42497.7	99152.4	105887	108667	92479.5	95116.1	77833.3	54982.6	59908.9	61732.6	54881	68653.4	53819.3	27792.4	28714.8	24956.9	26184.9	23726.7	35598.4
NMW0144	Neric Acid	Terpenoids	C10H16O2	4613-38-1	188746	173793	195014	171219	187900	162629	313300	521434	299111	333966	322360	278149	181467	182655	175578	169783	181014	183485	80167.6	80407.5	62158.7	54539.9	78257.6	105764
WMW0120	Nonane, 1-iodo-	Halogenated hydrocarbons	C9H19I	4282-42-2	78798.5	70657.2	80445.1	70251.2	78059.2	66987	144713	187508	139959	157013	151014	100258	65189	65942.5	63616.6	61604.8	65648.7	66446.6	35869.5	41695.5	33660.1	34455.6	38079.7	37737.6
XMW0649	Nonane, 2,6-dimethyl-	Hydrocarbons	C11H24	17302-28-2	29073.7	29462.8	27584.2	24136.1	28678.9	25509.5	88932.3	116664	91725	82803.2	109778	57969.2	49233.5	51477	46440.5	47119.8	65730.3	43418.9	18603.9	25180.9	19326.6	19588.7	19179.9	18983.7
w14	Octane, 1,1'-oxybis-	Hydrocarbons	C16H34O	629-82-3	8449.83	7410.4	8684.53	8349.69	8001.33	7968.99	9174.75	9587.18	8549.59	8623.41	7743.92	7554.12	7042.79	7730.58	7536.66	5751.83	5898.41	5373.8	3436.14	2700.34	2720.98	2307.13	2124.16	3324.31
XMW1417	Octanoic acid, 3-hexenyl ester, (Z)-	Ester	C14H26O2	61444-41-5	213356	159037	164764	146772	172837	182056	463173	477946	507378	428262	432004	337382	259782	265419	266266	264620	308963	245535	118451	126472	105734	109917	98692.6	150835
KMW0625	Octanoic acid, hexyl ester	Ester	C14H28O2	1117-55-1	177199	146192	174169	134825	140139	138229	410133	389661	431500	379426	357524	296285	225148	223904	223164	218440	231794	212487	144862	149170	147838	148139	141032	157539
XMW0813	Pentanal O-benzyloxime	Nitrogen compounds	C12H17NO	72399-21-4	793187	637922	710571	602379	706706	687039	1.14162e+06	1.23402e+06	1.21531e+06	1.07575e+06	1.14171e+06	916910	731238	763086	767057	713375	836076	689838	485634	493850	429096	454661	425746	580914
KMW0653	Pentanoic acid, 3,7-dimethyl-2,6-octadienyl ester, (E)-	Ester	C15H26O2	10402-47-8	43260	31272.6	31330.3	28583.3	31947.2	34793.5	54896.2	57126.5	89465.5	52750.7	67945.6	52032	37432	37455.9	38241.8	37382.4	41502	35674.4	22075.5	18707.2	14657.4	16386.3	15843.4	23340.8
NMW0047	Phenol, 2-ethyl-	Phenol	C8H10O	90-00-6	24283.2	26274	27789.6	21674	27134.4	24493.1	41034.5	46319.8	42161.5	38385.1	54162.9	50631.7	31440.6	30926.1	31904.6	31715.5	22326.8	29754.8	20860	18473	19143.5	19370.2	17115.4	19789.3
D183	Phenol, 4-(2-aminoethyl)-	Phenol	C8H11NO	51-67-2	52613.8	31406.1	32926.8	29389.6	38500.1	43010.1	66464.4	65132.9	74098.5	63859.9	54660	42250.9	27112.6	21318.7	22061.7	20915.9	33261.4	29934.7	25833.3	26901.8	19216.1	21823.8	21000.8	30043.3
XMW0953	Phenylacetic acid propyl ester	Ester	C11H14O2	4606-15-9	373842	344520	399102	341552	378574	315767	644240	975764	592189	671645	659795	561818	316149	320643	303341	290837	306952	311291	146071	145024	115955	106881	149314	197509
XMW0102	Propanenitrile, 3-(butylphenylamino)-	Nitrogen compounds	C13H18N2	61852-40-2	61569.7	56525.1	61509.6	56968.2	62204.8	62932.3	112890	122126	127413	107747	109584	87016.1	62396.1	69343.8	67942.6	64915.2	71600.4	63227.6	39011.4	40204.2	34651.4	37155	33614.4	36520.8
D157	Propanoic acid, 2-methyl-, 3-phenyl-2-propenyl ester	Ester	C13H16O2	103-59-3	108590	81939.5	98187.7	110183	90624	95001.6	190671	212679	206260	186083	185281	131264	110317	113477	113604	102469	116399	99301.3	80473.8	82492.8	72985.3	78020.7	74100.8	92882.7
XMW0695	Propanoic acid, 2-methyl-, octyl ester	Ester	C12H24O2	109-15-9	5380.64	4853.71	5921.9	5188.94	5045.3	4488.61	8985.7	13425.2	8310.44	9813.94	8953.04	7883.46	4591.78	4501.38	4286.85	4208.03	4680.9	4452.9	2278.68	2146.91	1826.49	1630.58	2075.95	2754.74
XMW0038	Quinoline, 2,7-dimethyl-	Heterocyclic compound	C11H11N	93-37-8	29746.2	2462.85	2462.85	27669.2	2462.85	26618.2	26377.9	24538.5	19368.4	23404.4	22651.2	19155.6	13808.3	12427.3	12314.3	14140.9	13385.3	13189.6	2462.85	2462.85	2462.85	2462.85	2462.85	2462.85
NMW0299*099	Santalol, E-cis,epi-.beta.-	Terpenoids	C15H24O	14490-17-6	23972.3	21553.6	24384.9	22694.4	22989.8	22903.6	28764.4	31102.6	29886.4	28537.8	28951.5	35516.6	27476.4	26292.7	26500	25108.2	28630.9	24218.5	12420.4	11169.7	9554.12	10397.5	10093.9	12803.2
XMW0156	Spiro[4.5]decan-7-one, 1,8-dimethyl-4-(1-methylethyl)-	Ketone	C15H26O	39510-26-4	48101.5	51330.7	49906.9	46368.9	45822.4	45379	60861.5	67171	63059	60712.4	59432.5	60436.8	39005	40494.1	40360.8	38804.4	41201.1	37327	12976.3	14224.8	14270.1	12811.1	12373.4	16250.3
KMW0640	Tetradecanal	Aldehyde	C14H28O	124-25-4	104661	80526.5	76604.7	68940.6	74320.5	79666.8	145987	108686	147714	149185	122976	130150	98596.4	102772	105737	90475.6	94629.9	93008.1	6744.74	8584.51	7373.38	8024.4	17021.2	22349.7
NMW0135	Thiocyanic acid, phenylmethyl ester	Sulfur compounds	C8H7NS	3012-37-1	52289.4	51164.9	57114.3	46157.9	53958.1	42855.6	89679.8	109585	84159.2	96379.7	93567.6	103565	58810.4	56865	56290.7	54355.8	57505.8	57266.2	21731.5	22274.4	17501.5	15729.2	22270	28417.6
NMW0288	Tolbutamide	Others	C12H18N2O3S	64-77-7	134725	55532.2	87694	53103.8	95755.1	67531.9	210344	154426	234213	198855	180309	138553	97676.2	102796	102447	97334.5	111831	97950.1	73012.9	76992.9	62777.3	65811.2	62019.2	73254.8
D138	Triacetin	Ester	C9H14O6	102-76-1	2071.95	2213.14	2787.8	2592.02	2418.05	2237.89	5571.39	6041.91	4331.91	6191.83	6505.67	7613.16	2125.61	2115.2	1917.57	2125.4	1636.61	1855.72	541.07	466.355	765.411	536.685	731.332	521.019
XMW0948	Valerena-4,7(11)-diene	Terpenoids	C15H24	351222-66-7	2.73744e+06	2.51057e+06	2.819e+06	2.52539e+06	2.6245e+06	2.52762e+06	5.99734e+06	6.0121e+06	5.76821e+06	5.89022e+06	5.72991e+06	4.94225e+06	1.98779e+06	1.94942e+06	1.86769e+06	1.01606e+06	5.13054e+06	4.90125e+06	1.38818e+06	1.31492e+06	1.32611e+06	1.38163e+06	1.42961e+06	1.41215e+06
NMW0294	Z-Butylidenephthalide	Hydrocarbons	C12H12O2	72917-31-8	10028.7	7041.13	9266.15	6975.67	8940.02	8621.43	24360.6	19162.5	26754.7	20031.3	17543.7	17310.4	12450.9	12583.8	12713	12495.4	11060.6	12484.2	4520.05	5988.26	4855.31	4918.33	4384.63	6273.01
KMW0478	cis-.beta.-Farnesene	Terpenoids	C15H24	28973-97-9	478928	433782	484012	451930	462820	452730	646226	588616	625905	572185	598794	633431	586867	581847	584582	552400	324748	400187	184992	184197	183792	185874	188494	191997
XMW0479	cis-3-Hexenyl salicylate	Ester	C13H16O3	65405-77-8	59241.7	40518.1	42483.6	37465.8	43991.2	46514.1	116998	114116	126017	104374	100832	80767.3	55878.8	58014	58473.1	56006.2	64908.4	56337.2	25343.5	29745.9	30859.1	32552.7	22555.4	33784.4
D399*124	cis-9-Tetradecen-1-ol	Alcohol	C14H28O	35153-15-2	74391.5	49123.4	50841.9	36521.1	55613.2	60141.9	95971.4	99771.1	108794	92632.1	82559.1	61516.8	42586.2	43851	43872.2	44006.5	48510.9	42580.4	34576	36618.2	28225.7	30477.6	28926.4	48651.8
KMW0555	trans-.alpha.-Bergamotene	Terpenoids	C15H24	13474-59-4	5.01856e+06	4.59079e+06	4.96997e+06	4.78924e+06	4.71821e+06	4.72893e+06	1.20573e+07	1.13817e+07	1.17308e+07	1.14282e+07	1.12109e+07	1.0242e+07	6.21711e+06	6.25582e+06	6.25662e+06	5.99104e+06	6.28343e+06	8.46857e+06	2.72664e+06	2.64895e+06	2.659e+06	2.70092e+06	2.73005e+06	2.86093e+06
D368	trans-11-Tetradecenyl acetate	Ester	C16H30O2	33189-72-9	3825.02	2834.27	2561.74	2148.98	2565.78	2347.15	4261.31	6860.99	4884.45	4046.57	7182.78	3785.05	1823.74	1947.92	2172.29	1902.91	2531.53	1942.22	1599.58	1231.59	1059.01	997.781	973.149	2271.08
KMW0299	trans-Rose oxide	Terpenoids	C10H18O	876-18-6	567472	608943	646514	491590	628125	544156	1.18987e+06	1.34167e+06	1.16298e+06	1.14219e+06	1.33576e+06	1.24432e+06	655264	656537	672881	669722	602876	629362	396390	362363	360265	374123	349119	390419
XMW1033	trans-Valerenyl acetate	Ester	C17H26O2	101527-74-6	11759.7	8293.75	8706.98	6247.83	8983.5	7170.2	10555.9	16676.9	11796.6	10306	20082.6	9938.18	6973.26	6863.25	5859.76	7049.14	10372.5	6446.75	2978.32	4638.76	3158.95	2235.38	2969.53	5366.87
XMW0746*118	(1R,2R,4S,6S,7S,8S)-8-Isopropyl-1-methyl-3-methylenetricyclo[4.4.0.02,7]decan-4-ol	Terpenoids	C15H24O	124753-76-0	163178	87987.2	101166	83186.1	110986	123343	121682	118938	145831	123772	91904.1	63376	45497.9	46745.5	52208.6	45463.4	49448.5	49468.2	81647.9	86537	64501.7	72628.4	75504.7	124250
XMW0843	(2E,4S,7E)-4-Isopropyl-1,7-dimethylcyclodeca-2,7-dienol	Alcohol	C15H26O	198991-79-6	73921.6	48807.4	66374.6	51769.6	61361.7	56617.1	31325.6	87897.7	64967.9	78670.8	71638.2	67971.8	41185.4	39453.1	45903.1	35396.8	40668.9	50343.7	26415.6	26454.2	23319.7	22579.1	22272.1	30806.9
XMW0556*064	(2S,4aR,8aR)-4a,8-Dimethyl-2-(prop-1-en-2-yl)-1,2,3,4,4a,5,6,8a-octahydronaphthalene	Terpenoids	C15H24	123123-37-5	2.96142e+06	3.60313e+06	3.37296e+06	3.28398e+06	3.02254e+06	3.11618e+06	2.33433e+06	2.35799e+06	2.23514e+06	2.41782e+06	2.216e+06	2.12859e+06	1.30952e+06	1.50589e+06	1.42639e+06	1.73996e+06	1.63811e+06	817501	893142	845300	883650	884009	893232	872048
XMW0388	(4aR,8aR)-5,8a-dimethyl-3-propan-2-ylidene-1,2,4,4a,7,8-hexahydronaphthalene	Terpenoids	C15H24	6813-21-4	6.44071e+06	8.27962e+06	6.78343e+06	8.01721e+06	7.26339e+06	7.72811e+06	5.83516e+06	5.70251e+06	5.495e+06	5.48052e+06	5.37625e+06	5.53746e+06	3.12249e+06	2.54939e+06	3.20316e+06	2.78466e+06	2.74289e+06	2.67445e+06	4.28517e+06	5.40425e+06	5.19871e+06	4.19093e+06	4.36598e+06	6.87327e+06
KMW0661*133	.alpha.-Bisabolol	Terpenoids	C15H26O	515-69-5	220412	196310	225803	278941	269713	268015	239347	289719	236248	254202	260645	266530	176444	184042	186343	168303	190949	169725	114640	122502	107115	113592	104715	134749
D216	.alpha.-Irone	Terpenoids	C14H22O	79-69-6	9.23511e+06	8.81559e+06	1.01721e+07	9.02533e+06	9.02393e+06	8.91752e+06	6.73547e+06	5.31934e+06	6.59449e+06	5.28195e+06	5.90703e+06	5.57361e+06	2.89873e+06	2.89088e+06	2.88527e+06	3.19899e+06	3.42621e+06	3.92926e+06	1.67614e+06	1.60985e+06	1.65357e+06	1.67377e+06	1.70546e+06	1.6483e+06
KMW0582*151	.beta.-Guaiene	Terpenoids	C15H24	88-84-6	330553	512448	379728	543405	564077	509431	1.0193e+06	1.09013e+06	874475	1.01935e+06	1.12099e+06	972193	32414	32414	32414	32414	32414	32414	177883	163748	162070	170158	178482	182975
XMW1429	1-(2-Hydroxyethyl)-1,2,4-triazole	Heterocyclic compound	C4H7N3O	3273-14-1	409064	402958	445976	378783	404095	379210	348281	959314	320195	309250	817028	261475	52295.1	52295.1	52295.1	52295.1	52295.1	52295.1	329561	342157	329051	342531	333609	335533
KMW0454	1-Cyclohexene-1-carboxAldehyde, 4-(1-methylethenyl)-	Aldehyde	C10H14O	2111-75-3	160698	232860	259326	243616	230544	216605	203561	219674	141310	234357	178500	227727	173796	178986	156941	159658	198196	162925	111131	96087.1	106649	116980	133604	104880
NMW0036	1-ethenyl-2-Pyrrolidinone	Heterocyclic compound	C6H9NO	88-12-0	1.00865e+06	990990	1.09379e+06	943645	1.00531e+06	1.02666e+06	1.97986e+06	1.96436e+06	1.81811e+06	1.94931e+06	1.91386e+06	1.61586e+06	172261	172261	172261	172261	172261	172261	917403	861307	905813	920726	952421	904885
KMW0644*118	1H-Cycloprop[e]azulen-7-ol, decahydro-1,1,7-trimethyl-4-methylene-, [1ar-(1a.alpha.,4a.alpha.,7.beta.,7a.beta.,7b.alpha.)]-	Terpenoids	C15H24O	6750-60-3	163178	87987.2	101166	83186.1	110986	123343	121682	118938	145831	123772	91904.1	63376	45497.9	46745.5	52208.6	45463.4	49448.5	49468.2	81647.9	86537	64501.7	72628.4	75504.7	124250
XMW0129	1H-Pyrrolizine-1-methanol, hexahydro-7-hydroxy-, [1S-(1.alpha.,7.alpha.,7a.beta.)]-	Heterocyclic compound	C8H15NO2	520-62-7	1.02788e+06	1.06456e+06	901537	979331	890726	1.08657e+06	963137	925067	1.27275e+06	874719	759869	929397	553226	591903	589502	571868	695835	584451	110645	110645	110645	110645	110645	110645
XMW0282	2,6-Dimethyldecane	Hydrocarbons	C12H26	13150-81-7	538263	507702	533632	489342	537233	514290	1.06576e+06	1.00617e+06	1.02528e+06	968922	977045	626239	72165.2	72165.2	72165.2	72165.2	72165.2	72165.2	381686	360826	376012	381864	401215	377967
XMW0034	2-Dimethylamino-4-methyl-pent-4-enenitrile	Amine	C8H14N2	94492-10-1	30440.1	25102	25770.5	21911.8	26007.3	26508.5	25202.8	22569.1	29502.3	22983.3	18528.4	12884.5	10462.6	14420.3	10262.1	10719.6	16065.9	14570.7	14252.8	15550	14302.8	14172.9	14131.6	18858.5
w42	2-Ethyl-1-dodecanol	Alcohol	C14H30O	19780-33-7	988354	860695	1.06538e+06	930178	1.00969e+06	968877	587417	844482	600794	613382	601804	555605	418574	408256	427770	377250	410197	383785	368759	408742	369192	383831	403726	471202
NMW0268	2-Propenoic Acid, 3-(2-hydroxyphenyl)-	Acid	C9H8O3	583-17-5	36235.8	29981.3	28070.7	29485.8	29964.6	29773.5	26051.6	27888.8	28164	24127.2	23507.9	3438.28	3438.28	3438.28	3438.28	3438.28	3438.28	3438.28	17745.3	18270.3	17191.4	17439.8	17815.6	19525.7
XMW0903	2-PyrrolidinemethanAmine, N-methyl-, (S)-	Heterocyclic compound	C6H14N2	66411-54-9	755573	747286	747118	725331	743093	762882	983652	756099	893796	923177	652536	591416	102606	102606	102606	102606	102606	102606	689877	563160	570447	589969	582131	709221
w45	2-Tetradecene, (E)-	Hydrocarbons	C14H28	35953-54-9	672646	626469	514130	584308	672591	647840	768273	687835	790083	675645	631973	585607	435145	457015	365565	451463	443975	356177	189346	158220	137807	154653	180610	220768
KMW0266	2-Thiophenemethanethiol	Heterocyclic compound	C5H6S2	6258-63-5	271639	264911	276733	252547	268888	253702	353421	271679	326803	248556	281690	210800	40966.1	40966.1	40966.1	40966.1	40966.1	40966.1	229790	235982	232174	237650	235467	237923
w10	2-Undecanone, 6,10-dimethyl-	Ketone	C13H26O	1604-34-8	87834.3	63688.3	54423	60393.2	70005.5	67724.2	78303.9	78405.4	80737.7	57924.8	63997.2	37737.1	38142.5	37626.3	38902.7	45797.7	28096.2	36926.3	19501.1	16717.3	14054.6	17801.6	18506.1	22850.1
KMW0258	2-methoxy-Phenol	Phenol	C7H8O2	90-05-1	201383	201038	192151	195313	196806	182268	20263.2	738560	769344	20263.2	648723	673527	20263.2	20263.2	20263.2	20263.2	20263.2	20263.2	164137	161926	161155	166290	162702	167204
XMW0391	3,5,11-Eudesmatriene	Terpenoids	C15H22	193615-07-5	55429.3	47820	51743.2	48255.6	49730.7	49401.1	40278.4	48049.9	54851.1	47099.1	39243.9	31343.3	25217.2	28225.5	26403.2	25782.3	27987.1	25187.2	26259.5	19205.1	19675.6	19924.1	20314.3	29286.7
XMW0073*145	3-Methylheptyl acetate	Ester	C10H20O2	72218-58-7	1.05255e+06	993853	1.36529e+06	960160	1.06094e+06	989745	2.39987e+06	1.88966e+06	2.00325e+06	2.32705e+06	1.99795e+06	1.57192e+06	155017	155017	155017	155017	155017	155017	796943	775085	789958	796679	828425	800002
NMW0230	5,6-Dihydro-5-methyluracil	Heterocyclic compound	C5H8N2O2	696-04-8	128386	74741.7	110894	66526.4	127105	127700	55686.4	121831	74246.5	120963	74128.1	115378	70416.6	64119.8	64344.3	49384	49054.8	43785.7	27205.3	26279.6	28246.6	27268.7	27171.9	26142.1
XMW1455	5-Amino-2-methoxyphenol	Phenol	C7H9NO2	1687-53-2	176864	113878	137538	105789	118698	111375	117878	124066	130359	122891	98334.7	94910.6	77081.3	80542.8	81187	69297	70044.5	74721.8	13859.4	13859.4	13859.4	13859.4	13859.4	13859.4
D434	5-Decen-1-ol, acetate, (E)-	Ester	C12H22O2	38421-90-8	191209	143916	119891	133380	153350	149065	173573	173887	179454	127074	142707	130920	85089.9	84470.9	85950.8	101145	62018.6	80412.2	12403.7	12403.7	12403.7	12403.7	12403.7	12403.7
WMW0115	5-Ethylhydantoin	Heterocyclic compound	C5H8N2O2	15414-82-1	56029.4	56299.2	79571.4	53076.9	55280.7	56661.2	125628	91977	93156.7	116719	94488	82648.5	9996.09	9996.09	9996.09	9996.09	9996.09	9996.09	57529.4	54218.7	49980.5	58190.1	52001	56930.4
KMW0546	Acetic acid, decyl ester	Ester	C12H24O2	112-17-4	472359	489533	514506	450931	409235	500894	441467	424492	582301	398835	350413	355256	256603	269541	268708	263920	263525	268143	51320.6	51320.6	51320.6	51320.6	51320.6	51320.6
NMW0045	AmphetAmine	Amine	C9H13N	300-62-9	11873.7	12548.4	13673.9	10735.4	12961.3	11002.2	23834.3	26582.7	23291.8	23389.6	26716.8	24741.4	2147.08	2147.08	2147.08	2147.08	2147.08	2147.08	2147.08	2147.08	2147.08	2147.08	2147.08	2147.08
NMW0233	Anabasine	Heterocyclic compound	C10H14N2	494-52-0	92601.4	98804.5	130585	97413.1	94113.3	95572.5	113379	92301.6	111084	92229.2	103211	90040.3	49152.3	43703.6	43720	53863.2	58029.4	62269.7	20176.6	18551.9	17892.8	20323.4	21136.7	19674.9
XMW0544	Azulene, 1,2,3,3a,4,5,6,7-octahydro-1,4-dimethyl-7-(1-methylethenyl)-, [1R-(1.alpha.,3a.beta.,4.alpha.,7.beta.)]-	Terpenoids	C15H24	22567-17-5	5.64851e+06	5.18858e+06	6.02667e+06	5.31277e+06	5.48301e+06	5.34838e+06	1.05142e+07	1.05776e+07	9.6827e+06	1.0488e+07	9.67103e+06	8.33338e+06	499314	499314	499314	499314	499314	499314	2.6712e+06	2.49657e+06	2.52604e+06	2.64265e+06	2.73656e+06	2.70751e+06
NMW0083	Benzene, 1-methyl-4-nitro-	Aromatics	C7H7NO2	99-99-0	104843	90491.1	92354.5	74794.2	96996.5	86650.6	238168	55323	175073	216449	43244.2	30268.5	52880.8	51275.6	46939.1	47890.6	51079.8	48671.3	42772.1	45526.3	40748.7	44568.2	38237.4	54347.8
XMW0751	Bergamotol, Z-.alpha.-trans-	Terpenoids	C15H24O	88034-74-6	287801	267350	300729	285317	281673	280191	254194	300496	246782	260657	267155	273096	176814	190107	183394	170049	188820	170435	123394	130859	113282	118568	111632	142265
D292	Bicyclo[2.2.1]heptane, 2-methyl-3-methylene-2-(4-methyl-3-pentenyl)-, (1S-endo)-	Terpenoids	C15H24	25532-78-9	143728	133481	141808	110430	137704	136839	186899	170891	184206	15397.8	174966	184579	15397.8	15397.8	15397.8	15397.8	15397.8	15397.8	78668.7	76988.9	77457.4	79290.3	78234.2	82589.6
NMW0043	Bicyclo[3.1.1]hept-2-en-6-one, 2,7,7-trimethyl-	Terpenoids	C10H14O	473-06-3	88549.9	94334.2	100571	77608.9	98143.2	82128	156845	148833	152735	151201	149608	142587	10248.3	10248.3	79895.2	10248.3	10248.3	75267.2	61989.3	54346.9	52928.4	56964.5	51241.6	62129
WMW0013*151	Bicyclosesquiphellandrene	Terpenoids	C15H24	54324-03-7	330553	512448	379728	543405	564077	509431	1.0193e+06	1.09013e+06	874475	1.01935e+06	1.12099e+06	972193	32414	32414	32414	32414	32414	32414	177883	163748	162070	170158	178482	182975
D284*126	Butanoic acid, 2-methyl-, 2-phenylethyl ester	Ester	C13H18O2	24817-51-4	73300.2	49898.5	56447.8	49102	60510	49907	47276.3	42871.5	49083.6	55765.5	51892.7	36905.2	29801.7	29335.7	28119.4	27481.4	19973.5	21225.2	34853.6	34196.4	35195.1	35495.4	38431.4	36114
KMW0424	Butanoic acid, 2-methyl-, hexyl ester	Ester	C11H22O2	10032-15-2	4053.02	4085.97	3911.54	3596	3999.71	3557.04	6028.07	6795.3	6963.78	5785.44	6374.15	5811.18	614.266	614.266	614.266	614.266	614.266	614.266	3143.91	3132.38	3175.89	3302.3	3188.48	3071.33
XMW1067	Butanoic acid, 2-pentenyl ester, (Z)-	Ester	C9H16O2	42125-13-3	4.6484e+06	4.44265e+06	4.92049e+06	4.29357e+06	4.64795e+06	3.81928e+06	8.84825e+06	6.88872e+06	8.45711e+06	8.55579e+06	6.85628e+06	5.96378e+06	536365	536365	536365	536365	536365	536365	2.7693e+06	2.68183e+06	2.74275e+06	2.76216e+06	2.89979e+06	2.77136e+06
D272*145	Butanoic acid, 3-methyl-, 2-methylbutyl ester	Ester	C10H20O2	2445-77-4	1.05255e+06	993853	1.36529e+06	960160	1.06094e+06	989745	2.39987e+06	1.88966e+06	2.00325e+06	2.32705e+06	1.99795e+06	1.57192e+06	155017	155017	155017	155017	155017	155017	796943	775085	789958	796679	828425	800002
XMW0981*126	Butanoic acid, 3-methyl-, 2-phenylethyl ester	Ester	C13H18O2	140-26-1	73300.2	49898.5	56447.8	49102	60510	49907	47276.3	42871.5	49083.6	55765.5	51892.7	36905.2	29801.7	29335.7	28119.4	27481.4	19973.5	21225.2	34853.6	34196.4	35195.1	35495.4	38431.4	36114
D85	Butanoic acid, 3-methyl-, hexyl ester	Ester	C11H22O2	10032-13-0	292532	288056	301785	303693	305870	310875	429257	443338	412402	405932	400622	403640	46872.4	46872.4	46872.4	46872.4	46872.4	46872.4	239999	284023	275402	279496	234362	285128
XMW1071	Butanoic acid, cyclopentyl ester	Ester	C9H16O2	6290-13-7	4724.21	5003.11	5356.76	3249.04	4998.42	3162.91	6876.74	7665.48	6893.73	6585.35	7313.65	6880.83	607.228	607.228	607.228	607.228	607.228	607.228	3554.34	3036.14	3281.21	3410.26	3260.8	3364.84
WMW0218	Butylated Hydroxytoluene	Aromatics	C15H24O	128-37-0	3.36365e+06	3.0687e+06	3.49431e+06	3.18493e+06	3.25189e+06	3.15627e+06	3.25027e+06	2.94792e+06	3.10834e+06	2.85286e+06	2.9564e+06	2.65433e+06	1.53564e+06	1.33656e+06	1.336e+06	1.54851e+06	1.60944e+06	1.65474e+06	448003	428441	444425	447408	449467	431166
XMW0271	Cadina-1(10),6,8-triene	Terpenoids	C15H22	1460-96-4	51911.7	51603.6	46140.7	52752.8	51705.2	51604.5	64530	58649.6	62062.7	57655.4	58080.5	52490.4	31342.7	28787.8	28106.3	31426.2	32847.6	32619.2	8775.42	8143.59	8575.89	8944.72	8809.14	8589.53
D218	Cyclohexanecarboxylic Acid	Acid	C7H12O2	98-89-5	5013.95	5175.03	5369.02	3856.57	5559.34	6456.48	6138.4	6480.15	4734.69	7861.36	6393.97	6808.14	3109.08	3213.75	2422.7	3189.59	4032.9	3623.37	4448.68	2911.86	2941.67	2622.67	2692.04	3068.51
XMW0411	Cyclohexanol, 2,6-dimethyl-	Alcohol	C8H16O	5337-72-4	59769.6	48707.7	52168.6	39885.4	49524.3	55081.9	72245.4	98433.5	72504.1	70096.2	91591.9	86016.6	5617.93	5617.93	5617.93	5617.93	5617.93	5617.93	31586.5	37170.5	28731.8	29955.2	28089.7	41719.5
D293	Cyclohexene, 4-[(1E)-1,5-dimethyl-1,4-hexadien-1-yl]-1-methyl-	Terpenoids	C15H24	25532-79-0	1.65677e+07	1.77439e+07	2.62583e+07	1.76449e+07	1.67446e+07	1.70369e+07	1.90541e+07	1.6215e+07	1.86481e+07	1.60944e+07	1.71799e+07	1.60863e+07	8.5365e+06	7.36491e+06	7.40876e+06	9.11903e+06	9.67798e+06	1.01857e+07	4.54406e+06	4.36767e+06	4.44406e+06	4.52286e+06	4.59442e+06	4.48254e+06
XMW0611	Decane, 2,3,6-trimethyl-	Hydrocarbons	C13H28	62238-12-4	3908.47	4304.09	4471.41	3616.13	4522.14	4252.64	8074.89	9108.64	8039.54	7624.44	7915.73	7220.71	512.104	512.104	512.104	512.104	4031.56	512.104	2846.3	3042.05	2560.52	3085.14	2608.13	3173.87
XMW1399	Decane, 2,5,9-trimethyl-	Hydrocarbons	C13H28	62108-22-9	2589.13	3739.98	3109.08	2151.35	2804.14	2300.17	5279.99	5904.74	5219.64	5106.19	5822.97	5490.13	321.807	321.807	321.807	321.807	321.807	321.807	1677.43	1718.95	1678.74	1723.45	1609.03	1870.56
XMW0734	Ethanone, 1-(2,4-dihydroxyphenyl)-	Ketone	C8H8O3	89-84-9	252420	233494	247885	234746	236581	237526	207152	246408	199558	233391	195792	164758	72220.1	68077.1	65694.2	65768.8	67970.4	70459.4	187741	182393	171069	184042	188383	191399
KMW0278	Ethanone, 1-(2-thienyl)-	Heterocyclic compound	C6H6OS	88-15-3	41082.9	39940.3	29026.4	38114.6	40096.7	38026	71497.7	60481.7	64570.1	64998.9	62379.5	53197.9	5805.28	5805.28	5805.28	5805.28	5805.28	5805.28	32394	30582	31622.2	32302.8	31678.4	32041.7
XMW0054	Farnesene epoxide, E-	Terpenoids	C15H24O	83637-40-5	54033.5	46430.1	49639.7	47640.9	47921.5	48276.5	35593.4	30464.9	47322.6	30375.9	40012.5	25038.6	20850.6	20185.2	20023.8	19365.7	20076	21286.1	29070.5	29486.3	27630.8	28909.1	29281.2	33202.4
NMW0218	Hordenine	Amine	C10H15NO	539-15-1	11949.1	10131.1	12681.4	9666.12	11205.7	10156.2	8643.21	9116.71	8273.91	9283.79	7548.92	8533.17	549.704	549.704	549.704	549.704	549.704	549.704	2823.98	2825.28	2748.52	2850.59	2915.51	3071.66
NMW0031	Hygrine	Heterocyclic compound	C8H15NO	496-49-1	7546.29	7623.96	7709.56	7368.03	7568.67	7386	12006.3	11962	11309	11710.9	11248.9	8988.17	876.714	876.714	876.714	876.714	876.714	876.714	6155.55	4383.57	4631.53	7449.83	6362.66	4718.46
XMW1454	Isomaltol	Heterocyclic compound	C6H6O3	3420-59-5	26225.2	16600	16916.6	14823.7	18730.9	23270.4	19593.7	17289.1	25699.1	19230.6	11667.1	8809.78	6849.25	6813.21	7254.54	7574.35	8095.39	7650.17	9154.76	11050	6314.58	9911.45	8940.01	13191
XMW0213	Isopentyl hexanoate	Ester	C11H22O2	2198-61-0	72990.2	116924	125796	119820	115070	105832	52762.5	70141.2	34388.2	73567.5	71876.1	86222.9	64357	68262.5	58978.8	61005.2	52931.7	57981	35653.1	30337.9	34214.8	35287.2	41992.8	33260.3
KMW0645*133	Levomenol	Terpenoids	C15H26O	23089-26-1	220412	196310	225803	278941	269713	268015	239347	289719	236248	254202	260645	266530	176444	184042	186343	168303	190949	169725	114640	122502	107115	113592	104715	134749
XMW1336	N-Benzyloxy-2-carbomethoxyaziridine	Heterocyclic compound	C11H13NO3	53084-33-6	2.67915e+07	1.31788e+07	2.60786e+07	2.20393e+07	2.58337e+07	2.13907e+07	2.16117e+07	1.98172e+07	2.52561e+07	1.91866e+07	1.90731e+07	2.32746e+07	1.08516e+07	8.61617e+06	1.08876e+07	9.07982e+06	9.13095e+06	8.55558e+06	1.27678e+07	1.33856e+07	1.35586e+07	1.25855e+07	1.23841e+07	1.21503e+07
KMW0626	Naphthalene, 1,2,3,4-tetrahydro-1,6-dimethyl-4-(1-methylethyl)-, (1S-cis)-	Terpenoids	C15H22	483-77-2	60920.3	50717.4	65124.2	53232.9	65773.9	67089.2	61004.5	66804.8	58173.2	49019.6	57649.9	57442.8	25455.4	29563.6	42114.3	33839.4	34646	18510.8	14522.7	12972.7	12996.9	14163.2	15490.4	14880.4
KMW0618*064	Naphthalene, 1,2,3,5,6,8a-hexahydro-4,7-dimethyl-1-(1-methylethyl)-, (1S-cis)-	Terpenoids	C15H24	483-76-1	2.96142e+06	3.60313e+06	3.37296e+06	3.28398e+06	3.02254e+06	3.11618e+06	2.33433e+06	2.35799e+06	2.23514e+06	2.41782e+06	2.216e+06	2.12859e+06	1.30952e+06	1.50589e+06	1.42639e+06	1.73996e+06	1.63811e+06	817501	893142	845300	883650	884009	893232	872048
XMW0009*064	Naphthalene, 1,2,4a,5,8,8a-hexahydro-4,7-dimethyl-1-(1-methylethyl)-, [1S-(1.alpha.,4a.beta.,8a.alpha.)]-	Terpenoids	C15H24	523-47-7	2.96142e+06	3.60313e+06	3.37296e+06	3.28398e+06	3.02254e+06	3.11618e+06	2.33433e+06	2.35799e+06	2.23514e+06	2.41782e+06	2.216e+06	2.12859e+06	1.30952e+06	1.50589e+06	1.42639e+06	1.73996e+06	1.63811e+06	817501	893142	845300	883650	884009	893232	872048
KMW0672	Naphthalene, 2,6-dimethyl-	Aromatics	C12H12	581-42-0	74262.9	59739.7	64316.9	55659.1	59068.1	60189.2	59801.2	69541.4	58699.4	66974.3	56326.3	42852.2	41047.2	36856.3	37819.6	33700.8	32293.2	30788	20218.7	19913.9	18174	18850.9	20089.6	22805.3
XMW0617	Propanoic acid, 2-methyl-, 3-hydroxy-2,2,4-trimethylpentyl ester	Ester	C12H24O3	77-68-9	17302.5	14681.7	43959.1	40237.8	24763.7	16104	13361.3	13194.1	21450	8320.61	10597.9	7533.95	7597.81	7711.55	7315.74	7665.42	7395.37	7639.23	1463.15	1463.15	1463.15	1463.15	1463.15	1463.15
KMW0190	Pyrazine, trimethyl-	Heterocyclic compound	C7H10N2	14667-55-1	111532	92466.2	118384	104826	117299	122491	135957	122956	164367	124793	102780	60397.5	62314.8	86223.4	61110.4	88678	94014.3	87258.2	52232.2	55483.6	51487	52875.8	51374.1	66929.6
KMW0306	Undecane	Hydrocarbons	C11H24	1120-21-4	6.07832e+06	5.73602e+06	7.43353e+06	5.58204e+06	6.99149e+06	5.80998e+06	1.34714e+07	1.08633e+07	1.09128e+07	1.30349e+07	1.10823e+07	8.87999e+06	811067	811067	811067	811067	811067	811067	4.23893e+06	4.05534e+06	4.18592e+06	4.19625e+06	4.42273e+06	4.21487e+06
WMW0007	[1S-(1.alpha.,7.alpha.,8a.beta.)]-1,2,3,5,6,7,8,8a-octahydro-1,4-dimethyl-7-(1-methylethenyl)-Azulene	Terpenoids	C15H24	3691-11-0	4.56464e+06	3.852e+06	4.19693e+06	3.71521e+06	4.73377e+06	4.94126e+06	8.69206e+06	8.73748e+06	8.34052e+06	8.48993e+06	1.1299e+07	8.50704e+06	743042	743042	743042	743042	743042	743042	4.11034e+06	4.32781e+06	4.32813e+06	4.10815e+06	4.20895e+06	4.08049e+06
