# Supplementary material for: Integrated volatile metabolome and transcriptome analyses provide insights into the warm aroma formation elicited by methyl jasmonate in carrot root
Source: Front Plant Sci. 2024 Sep 18;15:1467957. doi: 10.3389/fpls.2024.1467957 (PMC11457697; doi:10.3389/fpls.2024.1467957)
Supplement: Supplementary file 3 [file Table3.xlsx]

## Sheet: Sheet1
Table S3 Primer sequences utilized for qRT-PCR
Gene ID	Functional annotation	Forward primer (5'-3')	Reverse primer (5'-3')
DCAR_012538.v1.0	Terpene synthase like-5	GGTGCTCACTGCTGCTACA	ATCCGCCACATCCCATCTTT
novel.1328	(R)-limonene synthase 1-like	CTAATCCAGTGCCGATACTCTAAG	GCCTCTTCATCTTCAACACCAA
novel.566	sesquiterpene synthase 2	GGCTAAGGATGTGAGAGGAATG	TCAATGAACGACGAACAAGGT
novel.748	terpene synthase 10-like	CTGGTGAATGATACGACTTACGA	CTCCTCTAGTGTTGGCTGGTA
DCAR_015840.v1.0	ethylene-responsive transcription factor ERF098-like	GGATACGAGCCTCACCACTT	AACCTCCTTCTCTTTCTCCTTAGT
DCAR_005379.v1.0	probable WRKY transcription factor 30	GTAGACTACACTAAGCAGAAGGC	TAGCACCAGACTTGAGCATTG
DCAR_007653.v1.0	protein TIFY 10A isoform X2	CCTCTGCCTCTGCGACTATT	CCTGTCCTTCCTCTTCTCCAA
DCAR_009709.v1.0	myb-related protein 308-like	CTTAACCTCTCCAAGTGTCTCAG	GCCAGCTCATAATCTTCAACCA
DCAR_007860.v1.0	Ethylene-responsive transcription factor ERF109	TGCTGATTACAAGTCTTCGTCTC	TGTCCATCGCCATCATCCAT
