# Supplementary material for: Integrated volatile metabolome and transcriptome analyses provide insights into the warm aroma formation elicited by methyl jasmonate in carrot root
Source: Front Plant Sci. 2024 Sep 18;15:1467957. doi: 10.3389/fpls.2024.1467957 (PMC11457697; doi:10.3389/fpls.2024.1467957)
Supplement: Supplementary file 4 [file Table4.xlsx]

## Sheet: Sheet1
Table S4 Summary of samples and RNA-seq data
Samples	Raw reads	Clean reads	Q20 (%)	Mapped reads	Mapped ratio (%)
CK-1	58387746	56555198	98.16	50995928	90.17%
CK-2	50232268	48686736	98.2	43916118	90.20%
CK-3	48290416	46811544	98.19	42192068	90.13%
MeJA100-1	53425186	51627276	98.25	46559683	89.48%
MeJA100-2	53011832	51392072	98.22	43749431	89.96%
MeJA100-3	52565052	51032826	98.28	45849207	90.43%
MeJA200-1	53784046	52257146	98.17	46667718	90.39%
MeJA200-2	56193016	54531306	98.12	46410140	90.31%
MeJA200-3	58392840	56636758	98.15	46088720	90.31%
DIECA-1	53930522	52034584	98.33	46683879	89.33%
DIECA-2	50157452	48629540	98.16	48697990	89.30%
DIECA-3	52267492	50701870	98.3	50537646	89.23%
	CK-1	56555198	50995928(90.17%)	49039176(86.71%)	1956752(3.46%)	24642005(43.57%)
	CK-2	48686736	43916118(90.20%)	42360857(87.01%)	1555261(3.19%)	21280406(43.71%)
	CK-3	46811544	42192068(90.13%)	40669961(86.88%)	1522107(3.25%)	20433523(43.65%)
	DIECA-1	52034584	46559683(89.48%)	44829836(86.15%)	1729847(3.32%)	22490313(43.22%)
	DIECA-2	48629540	43749431(89.96%)	42080542(86.53%)	1668889(3.43%)	21148102(43.49%)
	DIECA-3	50701870	45849207(90.43%)	44175305(87.13%)	1673902(3.30%)	22177044(43.74%)
	MeJA100-1	51627276	46667718(90.39%)	45036307(87.23%)	1631411(3.16%)	22621826(43.82%)
	MeJA100-2	51392072	46410140(90.31%)	44741184(87.06%)	1668956(3.25%)	22474844(43.73%)
	MeJA100-3	51032826	46088720(90.31%)	44483691(87.17%)	1605029(3.15%)	22343592(43.78%)
	MeJA200-1	52257146	46683879(89.33%)	44988327(86.09%)	1695552(3.24%)	22604461(43.26%)
	MeJA200-2	54531306	48697990(89.30%)	46911669(86.03%)	1786321(3.28%)	23590870(43.26%)
	MeJA200-3	56636758	50537646(89.23%)	48686359(85.96%)	1851287(3.27%)	24471147(43.21%)
